# Supplementary material
Source: Research Square preprint supplement (doi:10.21203/rs.3.rs-9081705/v1)
Supplement: Supplementary file 2 [file 6ac53ab006e674852bd1b2bd.xlsx]

## Sheet: Contents
Additional File 1
Table S1	Description of published construct-based RT-PCR and MPSA datasets selected for inclusion in analysis
Table S2	Detailed summary of MPSA designs and characteristics
Table S3	Minigene RT-PCR splicing assay results and bioinformatic predictions
Table S4	Variants tested by RT-PCR minigene assay and reported in ClinVar with clinical classifications
Table S5	Manual review of ClinVar submissions for variants outside the splice donor/acceptor ±1,2 dinucleotide positions
Table S6	Concordance of spliceAI max delta score thresholds defined in Walker et al., 2023 and observed splicing by MPSAs
Table S7	Number of variants tested and percentage of canonical transcript produced by each wild type construct included in the traditional minigene dataset
Table S8	Distribution of variants outside the splice donor/acceptor ±1,2 dinucleotide positions with additional stratification of SpliceAI max delta score bins
Table S9	Proportion of variants (including the splice donor/acceptor ±1,2 dinucleotide positions) across different ranges of SpliceAI max delta scores
Table S10	Concordance of SAI-10k-calc transcript prediction with minigene assay results
Table S11	Concordance of minigene and patient RNA findings
Table S12	BRCA2 variants showing no aberration in patient RNA assays
Table S13	Considerations for design and critique of minigene and multiplex assay reliability and performance
Table S14	Shorthand nomenclature for variant-induced transcripts

## Sheet: S1
Supplementary Table S1. Description of published construct-based RT-PCR and MPSA datasets selected for inclusion in analysis
First Author	Year	Title	Number of Variants	Assay type	Data source
RT-PCR data
Canson et al (PMID: 40341019)	2025	TP53 minigene analysis of 161 sequence changes provides evidence for role of spatial constraint and regulatory elements on variant-induced splicing impact	150	8 exon minigene	https://doi.org/10.1038/s41525-025-00498-0
Fortuno et al (PMID: 39780207)	2025	Exploring the role of splicing in TP53 variant pathogenicity through predictions and minigene assays	67	8 exon minigene	http://doi.org/10.1186/s40246-024-00714-5
Sanoguera-Miralles et al (PMID: 37725924)	2024	Systematic Minigene-Based Splicing Analysis and Tentative Clinical Classification of 52 CHEK2 Splice-Site Variants	52	5-7 exon minigenes	http://doi.org/10.1093/clinchem/hvad125
Sanoguera-Miralles et al (PMID: 35740625)	2022	Minigene Splicing Assays Identify 20 Spliceogenic Variants of the Breast/Ovarian Cancer Susceptibility Gene RAD51C	20	7 exon minigene	http://doi.org/10.3390/cancers14122960
Valenzuela-Palomo et al (PMID: 36139699)	2022	Splicing Analysis of 16 PALB2 ClinVar Variants by Minigene Assays: Identification of Six Likely Pathogenic Variants	16	3 exon minigene	http://doi.org/10.3390/cancers14184541
Bueno-Martínez et al (PMID: 35716007)	2022	Minigene‐based splicing analysis and ACMG/AMP‐based tentative classification of 56 ATM variants	56	4-7 exon minigenes	http://doi.org/10.1002/path.5979
Valenzuela-Palomo et al (PMID: 34846068)	2022	Splicing predictions, minigene analyses, and ACMG‐AMP clinical classification of 42 germline PALB2 splice‐site variants	42	3-8 exon minigenes	http://doi.org/10.1002/path.5839
Bueno-Martínez et al (PMID: 34200360)	2021	RAD51D Aberrant Splicing in Breast Cancer: Identification of Splicing Regulatory Elements and Minigene-Based Evaluation of 53 DNA Variants	11	8 exon minigene	http://doi.org/10.3390/cancers13112845
Sanoguera-Miralles et al (PMID: 33333735)	2020	Comprehensive Functional Characterization and Clinical Interpretation of 20 Splice-Site Variants of the RAD51C Gene	20	7 exon minigene	http://doi.org/10.3390/cancers12123771
Fraile-Bethencourt et al (PMID:30883759)	2019	Mis-splicing in breast cancer: identification of pathogenic BRCA2 variants by systematic minigene assays	83	8 exon minigene	http://doi.org/10.1002/path.5268
Fraile-Bethencourt et al (PMID:31191615)	2019	Minigene Splicing Assays Identify 12 Spliceogenic Variants of BRCA2 Exons 14 and 15	52	7 exon minigene	http://doi.org/10.3389/fgene.2019.00503
Fraile-Bethencourt et al (PMID:29881398)	2018	Identification of Eight Spliceogenic Variants in BRCA2 Exon 16 by Minigene Assays	12	7 exon minigene	http://doi.org/10.3389/fgene.2018.00188
Fraile-Bethencourt et al (PMID:28339459)	2017	Functional classification of DNA variants by hybrid minigenes: Identification of 30 spliceogenic variants of BRCA2 exons 17 and 18	52	7 exon minigene	http://doi.org/10.1371/journal.pgen.1006691
Acedo et al (PMID:25382762)	2015	Functional classification of BRCA2 DNA variants by splicing assays in a large minigene with 9 exons	40	9 exon minigene	http://doi.org/10.1002/humu.22725
Massively Parallel Splicing Assays (MPSA) data
O’Neill et al (PMID: 39333091)	2024	ParSE-seq: A Calibrated Multiplexed Assay to Facilitate the Clinical Classification of Putative Splice-altering Variants	244	Minigene - percentage spliced in (sequencing data)	https://doi.org/10.1038/s41467-024-52474-4
Rong et al (PMID: 37192163)	2023	Large-scale functional screen identifies genetic variants with splicing effects in modern and archaic humans	5169	Same as Soemedi	http://doi.org/10.1073/pnas.2218308120
Rhine et al (PMID: 35051175)	2022	Massively parallel reporter assays discover de novo exonic splicing mutants in paralogs of Autism genes	725	Same as Soemedi	http://doi.org/10.1371/journal.pgen.1009884
Patel et al (PMID: 34461741)	2021	Contribution of Noncanonical Splice Variants to TTN Truncating Variant Cardiomyopathy	261	Minigene - percentage spliced in (sequencing data)	http://doi.org/10.1161/CIRCGEN.121.003389
Chong et al (PMID: 30503770)	2019	A Multiplexed Assay for Exon Recognition Reveals that an Unappreciated Fraction of Rare Genetic Variants Cause Large-Effect Splicing Disruptions	27733	Minigene - GFP reporter	Github - https://github.com/KosuriLab/MFASS
Adamson et al (PMID: 29859120)	2018	Vex-seq: high-throughput identification of the impact of genetic variation on premRNA splicing efficiency	2059	Minigene - percentage spliced in (sequencing data)	Github - https://github.com/scottiadamson/Vex-seq
Soemedi et al (PMID: 28416821)	2017	Pathogenic variants that alter protein code often disrupt splicing	4,964	Minigene - allelic ratio	http://fairbrother.biomed.brown.edu/ESM_browser/

## Sheet: S2
Supplementary Table S2. Detailed summary of MPSA designs and characteristics
First Author	Year	PMID	Assay type	Splicing reporter design	Test sequence	Test exon size	Flanking intron size	Total size of insert	Cell line	Sequencing platform/method	Splicing quantification	Study reported threshold for splicing impact (FC, fold change; FDR, False discovery rate; PSI, Percentage spliced in)	Type of aberration detected	Variant location	No. of variants tested	Experimental control variants (positive=impacts splicing, negative=no impact)	Clinical validation controls	Issues with published dataset
Soemedi	2017	28416821	broad screen (950 genes, 1-63 exons per gene)	Splicing reporter includes a cytomegalovirus (CMV) promoter, an adenovirus (pHMS81) exon with part of its downstream intron, the 200-mer oligonucleotide library, exon 16 of ACTN1 with part of intron 15 and the bGH poly(A) signal sequence.	1 exon with flanking intronic sequence	≤100 bp	≥55 bp upstream of exon, 15 bp downstream of exon	170 bp flanked by 15-mer common primer sequences	HEK293T	Illumina HiSeq 2500 (100-bp paired-end reads)	Allelic ratio	Allelic ratio FC > 1.5, FDR < 0.05	Exon skipping/inclusion and alternative splice site usage. Exact position of alternative splice sites was not provided.	Exon only	4964	No splice site dinucleotide variants included in the assay. Negative controls: common SNPs (231 in supp. table, 228 in main text) - assumed not to impact splicing, 8 of these SNPS disrupted splicing in the assay. Validation using patient samples: 20 positive and 12 negative; 85% (17/20) of MaPSy-detected splice-altering variants and 75% (9/12) of splice-neutral variants were validated in patient …		Genome coordinates were provided with incorrect reference allele. We assume the alleles were coded based on transcripts. Allelic ratio and p-values were manually calculated based on count data provided. The public data link is no longer active.
Adamson	2018	29859120	broad screen (110 genes, 1 exon per gene)	A modified version of the splicing reporter plasmid pcAT7-Glo1. Reporter includes a chicken beta-actin promoter, the first exon and part of the first intron of the globin gene, the test sequence, followed by the second intron and final exon of the reporter transcript, ending with the barcode and the 3′ UTR.	1 exon with flanking intronic sequence	68-97 bp	≥50 bp upstream of exon, ≥20 bp downstream of exon	~170 bp	HepG2 and K562	Illumina MiSeq using a v2 300-cycle kit (read 1 and read 2 were 150 bases each)	Percentage spliced in (from barcoded sequencing data)	Absolute PSI > 5	Exon skipping/inclusion	Exon or intron up to ~50 bp flanking the exon	2059	Positive controls: AG>TC acceptor site and GT>CA donor site variants. The variant constructs contained a 20-nt pyrimidine tract, an AG at the 3' splice site, and a consensus donor motif of GTAAGT. No negative control variants identified in the study.
Chong	2019	30503770	broad screen (1591 genes, 1-23 exons per gene)	Splicing reporter includes a CAG-GS promoter, an emerald GFP (emGFP) coding sequence split into two exons that flank a constant intron backbone sequence (either DHFR or SMN1), and an mCherry coding sequence. The test exon is inserted in between the emGFP split exons.	1 exon with flanking intronic sequence	<100 bp (in-frame)	≥40 bp upstream of exon, ≥30 bp downstream of exon	170 bp flanked by 15-mer common primer sequences	HEK293T	Illumina NextSeq 2500 (150-bp paired-end reads) - SNV library version 2 dataset: for confirmation of variant	Inclusion index (from fluorescence-activated cell sorting based on GFP and mCherry reporter proteins)	Delta PSI ≤ -0.5	Exon skipping/inclusion. Alternative 5' and 3' splice site usage result in false negatives for MFASS.	Exon or intron up to ~50 bp flanking the exon	27733	Positive controls: (i) AG>TT acceptor site and GT>CC donor site variants, (ii) scrambled sequences, and (iii) exons that were skipped in the SRE library. Negative controls: natural exons (not variants)
Patel	2021	34461741	gene-specific (3 genes, multiple exons per gene)	A ∼1,200 bp DNA construct containing a cytomegalovirus (CMV) promoter, the relevant intron flanked by exon fragments, and a 2 bp barcode, and SV40 polyA tail	500 bp Exon-Intron-Exon test sequence (~220 bp sequences surrounding splice junctions)	Whole exons were not tested due to the 500-bp limit. Only part of the exon upstream of the donor site and part of the exon downstream of the acceptor site were included in the construct.	Intronic sequences were allocated such that the sequences surrounding the splice junctions would total to ~220 bp.	500 bp exon-intron-exon (excluding deep intronic regions when necessary)	HEK293	Illumina MiSeq	Percentage spliced in (from barcoded sequencing data)	Fisher's p < 0.001	Splice site loss (resulting in intron retention) and alternative splice site usage	Within the splice region (9 bp donor motif and 23 bp acceptor motif) excluding splice site dinucleotides	254	No splice site dinucleotide variants included in this study. Assay method was previously validated using 10 positive control variants known to alter splicing with 100% concordance (PMID: 28679633). No negative control variants identified in the study.		We re-calculated the p values following the formula originally used by the authors, but we could not replicate the published p values.
Rhine	2022	35051175	broad screen (681 genes, 1-3 exons per gene)	Splicing reporter includes a cytomegalovirus (CMV) promoter, an adenovirus (pHMS81) exon with part of its downstream intron, the 200-mer oligonucleotide library, exon 16 of ACTN1 with part of intron 15 and the bGH poly(A) signal sequence.	1 exon with flanking intronic sequence	≤100 bp	≥55 bp upstream of exon, 15 bp downstream of exon	170 bp flanked by 15-mer common primer sequences	HEK293T	Illumina HiSeq 2500 (100-bp paired-end reads)	Allelic ratio	Allelic ratio FC > 1.5, FDR < 0.05	Exon skipping/inclusion and alternative splice site usage. Exact position of alternative splice sites was not provided.	Exon only	725	No splice site dinucleotide variants included in the assay. Assay method was previously assessed using common SNPs as negative controls and validated using patient samples (Soemedi et al., 2017).
Rong	2023	37192163	broad screen (3512 genes)	Splicing reporter includes a cytomegalovirus (CMV) promoter, an adenovirus (pHMS81) exon with part of its downstream intron, the 230-mer oligonucleotide library, exon 16 of ACTN1 with part of intron 15 and the bGH poly(A) signal sequence.	1 exon with flanking intronic sequence	10-120 bp	For exons > 120 bp: ≥55 bp upstream of exons, ≥15 bp downstream of the exon For 5` varaints in exons 121-500 bp: 55 bp upstream + 100 bp test exon, 20 bp common exon and 15 bp common intron downstream For 3` varaints in exons 121-500 bp: 55bp common intron, 20 bp common exon, 100 bp test exon, 15 bp intron downstream	230 bp	HEK293T	HiSeq 4000 (2x150 paired-end)	Allelic ratio	Allelic ratio FC > log2(1.5), FDR < 0.05	Exon skipping/inclusion and alternative splice site usage. Exact position of alternative splice sites was not provided.	Exon only	5169	No splice site dinucleotide variants included in the assay. Assay method was previously assessed using common SNPs as negative controls and validated using patient samples (Soemedi et al., 2017).
O’Neill	2024	39333091	gene-specific (1 gene, 19 exons)	A modified pET01 vector (pAG424) containing rat insulin exon 1 and part of its downstream intron 1, the test exon with flanking intronic sequences, followed by part of rat insulin intron 1 and then exon 2 with 18-mer barcode.	1 exon with flanking intronic sequence	54-351 bp	150-250 bp upstream of exon, 125-250 bp downstream of exon	342-873 bp	HEK293 and iPSC-CM	Illumina NovaSeq (150-bp paired-end reads)	Percentage spliced in (from barcoded sequencing data)	Aberrant: Normalised PSI < 50%; Indeterminate: Normalised PSI >50% and <20%; Normal: Normalised PSI >20%	Exon skipping/inclusion and alternative splice site usage. Exact position of alternative splice sites was not provided.	Exon or intron within 170 bp from exon-intron junction	HEK293: 244, iPSC-CM: 224	Positive controls: 36 splice site dinucleotide variants [with SAI max delta score >=0.2]	HEK293 - 30 abnormal out of 31 P/LP variants and 27 normal out of 27 B/LB variants; iPSC-CM - 24 abnormal out of 25 P/LP variants and 21 normal out of 22 B/LB variants. OddsPath equivalent to PS3/BS3 Strong

## Sheet: S3
Supplementary Table S3. Minigene RT-PCR splicing assay results and bioinformatic predictions
# HGVS descriptions for transcripts are reported in the original publications (see Reference PMIDs).
# Notes for CHEK2 assay results : OTHER - the native start codon is eliminated; 5'UTR - affects the 5'UTR only
# SAI-10k-calc vs assay (number codes); SAI-10k-calc with SAI-visual vs assay (number codes): see Supplementary Table S10 for descriptions
# SpliceVault top events: ES - exon skipping, CD - cryptic donor, CA - cryptic acceptor. For ES, describes skipped exons, e.g. ES:2 represents exon 2 skipping and ES:2-3 represents skipping of exon 2 and 3. For CD/CA, describes the distance from the annotated splice-site to the cryptic splice-site with reference to the transcript (distances to negative strand transcripts are reported according to…
# Match assay results and SpliceVault Top-4: 1 - match with at least 1 detected transcript >20%; 0 - no match or match with assay-detected transcript(s) ≤20%; "-" - no prediction; NA - not applicable
Reference (PMID)	Gene	RefSeq transcript	HGVSc	Canonical transcript from WT construct	Canonical transcript from variant construct	CT reduction: (WT-variant)/WT	PTC transcript	PTC transcript proportions	In-frame transcript	In-frame transcript proportions	Uncharacterised	Uncharacterised transcript proportions	Level of splicing aberration	SpliceAI max delta score (raw)	SAI-10k-calc (Any splicing aberration)	SAI-10k-calc aberration prediction	SAI-10k-calc flagged (exon skipping or intron retention)	SAI-visual manual inspection (exon skipping or intron retention)	SAI-10k-calc vs assay (number codes)	SAI-10k-calc with SAI-visual vs assay (number codes)	SpliceVault top events	Match assay results and SpliceVault Top-4
33333735	RAD51C	NM_058216.3	WT (mgR51C_ex2-8)	0.986	0.986	0	-	-	-	-	1106-nt	0.014	NA	NA	NA	NA			NA	NA	NA	NA
33333735	RAD51C	NM_058216.3	NM_058216.3:c.146-3C>T	0.986	1	-0.0141988	-	-	-	-	-	-	no aberration	0.17	NO	no aberrant transcript			3-	3-	-	-
33333735	RAD51C	NM_058216.3	NM_058216.3:c.404G>A	0.986	0	1	▼(E2q27); Δ(E2q175); Δ(E2q22); Δ(E2)	69.3%; 19.9%; 4.3%; 2.4%	-	-	913-nt	0.041	complete	0.85	YES	Δ(E2q22) [FS]; flagged	lost site/s do not match native site	Δ(E2) [FS]	4+	4+	Top1:CD:+28:11%:inFrame,Top2:ES:2:8%:Frameshift,Top3:CD:-22:0.6%:Frameshift,Top4:CD:-175:0.5%:Frameshift	1
33333735	RAD51C	NM_058216.3	NM_058216.3:c.405-6T>A	0.986	0	1	▼(E3p4); Δ(E3)	95.2%; 4.8%	-	-	-	-	complete	0.95	YES	▼(E3p4) [FS]; Δ(E3) [FS]			6+	6+	Top1:ES:3:23%:Frameshift,Top2:ES:3-4:3%:Frameshift,Top3:CA:-213:0.3%:Frameshift,Top4:ES:2-3:0.2%:inFrame	0
33333735	RAD51C	NM_058216.3	NM_058216.3:c.571+4A>G	0.986	0.054	0.945233	Δ(E3); ▼(E3q4)	76.5%; 11.6%	Δ(E3q114)	0.04	808-nt; 774-nt	1.4%; 1.1%	high	0.47	YES	Δ(E3) [FS]			5+	5+	Top1:ES:3:25%:Frameshift,Top2:ES:3-4:4%:Frameshift,Top3:CD:-114:1%:inFrame,Top4:ES:2-3:0.2%:inFrame	1
33333735	RAD51C	NM_058216.3	NM_058216.3:c.571+5G>A	0.986	0	1	Δ(E3)	0.915	Δ(E3q114)	0.048	808-nt; 917-nt; 774-nt	1.6%; 1.1%; 1.0%	complete	0.93	YES	Δ(E3) [FS]			6+	6+	Top1:ES:3:25%:Frameshift,Top2:ES:3-4:4%:Frameshift,Top3:CD:-114:1%:inFrame,Top4:ES:2-3:0.2%:inFrame	1
33333735	RAD51C	NM_058216.3	NM_058216.3:c.572-1G>T	0.986	0	1	Δ(E4)	0.934	-	-	1005-nt; 1058-nt	3.3%; 3.3%	complete	0.99	YES	Δ(E4) [FS]			6+	6+	Top1:ES:4:12%:Frameshift,Top2:CA:+81:6%:inFrame,Top3:ES:3-4:4%:Frameshift,Top4:ES:4-5:2%:Frameshift	1
33333735	RAD51C	NM_058216.3	NM_058216.3:c.705G>T	0.986	0	1	Δ(E4)	100%	-	-	-	-	complete	0.87	YES	Δ(E4) [FS]			6+	6+	Top1:ES:4:12%:Frameshift,Top2:ES:3-4:4%:Frameshift,Top3:ES:4-5:1%:Frameshift,Top4:CD:+276:0.02%:Frameshift	1
33333735	RAD51C	NM_058216.3	NM_058216.3:c.705+5G>C	0.986	0.516	0.476673	Δ(E4)	0.484	-	-	-	-	intermediate	0.09	NO	no aberrant transcript			1-	1-	-	-
33333735	RAD51C	NM_058216.3	NM_058216.3:c.706-2A>C	0.986	0	1	Δ(E5p10); Δ(E5p52)	91.4%; 1.8%	Δ(E5)	0.04	886-nt	0.028	complete	1	YES	Δ(E5p10) [FS]; Δ(E5) [IF]			6+	6+	Top1:ES:5:2%:inFrame,Top2:ES:4-5:1%:Frameshift,Top3:CA:-275:0.2%:Frameshift,Top4:ES:5-6:0.1%:Frameshift	0
33333735	RAD51C	NM_058216.3	NM_058216.3:c.706-2A>G	0.986	0	1	Δ(E5p10)	0.335	Δ(E5)	0.654	972-nt	0.011	complete	1	YES	Δ(E5p10) [FS]; Δ(E5) [IF]			6+	6+	Top1:ES:5:2%:inFrame,Top2:ES:4-5:1%:Frameshift,Top3:CA:-275:0.2%:Frameshift,Top4:ES:5-6:0.1%:Frameshift	1
33333735	RAD51C	NM_058216.3	NM_058216.3:c.837+2T>C	0.986	0	1	Δ(E4_E5)	0.022	Δ(E5)	0.893	972-nt	0.085	complete	0.99	YES	Δ(E5) [IF]			6+	6+	Top1:ES:5:2%:inFrame,Top2:ES:4-5:1%:Frameshift,Top3:ES:5-6:0.1%:Frameshift,Top4:CD:-58:0.006%:Frameshift	1
33333735	RAD51C	NM_058216.3	NM_058216.3:c.905-3C>G	0.986	0	1	Δ(E7); Δ(E7_E8)	98.1%; 1.9%	-	-	-	-	complete	0.9	YES	Δ(E7) [FS]			6+	6+	Top1:ES:7:48%:Frameshift,Top2:ES:7-8:24%:Frameshift,Top3:ES:6-7:10%:Frameshift,Top4:CA:-23:0.5%:Frameshift	1
33333735	RAD51C	NM_058216.3	NM_058216.3:c.905-2A>C	0.986	0	1	Δ(E7)	0.974	-	-	660-nt	0.026	complete	0.91	YES	Δ(E7) [FS]			6+	6+	Top1:ES:7:48%:Frameshift,Top2:ES:7-8:24%:Frameshift,Top3:ES:6-7:10%:Frameshift,Top4:CA:-23:0.5%:Frameshift	1
33333735	RAD51C	NM_058216.3	NM_058216.3:c.905-2_905-1del	0.986	0	1	Δ(E7)	100%	-	-	-	-	complete	0.91	-	-			NA	NA	Top1:ES:7:48%:Frameshift,Top2:ES:7-8:24%:Frameshift,Top3:ES:6-7:10%:Frameshift,Top4:CA:-23:0.5%:Frameshift	1
33333735	RAD51C	NM_058216.3	NM_058216.3:c.965+5G>A	0.986	0	1	Δ(E7)	100%	-	-	-	-	complete	0.92	YES	Δ(E7) [FS]			6+	6+	Top1:ES:7:48%:Frameshift,Top2:ES:7-8:24%:Frameshift,Top3:ES:6-7:10%:Frameshift,Top4:CD:+5:0.04%:Frameshift	1
33333735	RAD51C	NM_058216.3	NM_058216.3:c.966-3C>A	0.986	0.02	0.979716	Δ(E8)	0.868	▼(E8p3)	0.097	881-nt	0.015	high	0.56	YES	Δ(E8) [FS]			6+	6+	Top1:CA:-4:52%:inFrame,Top2:ES:7-8:24%:Frameshift,Top3:ES:8:9%:Frameshift,Top4:CA:-41:0.03%:Frameshift	1
33333735	RAD51C	NM_058216.3	NM_058216.3:c.966-2A>G	0.986	0	1	Δ(E8)	0.867	▼(E8p3)	0.11	881-nt; 940-nt	1.2%; 1.1%	complete	0.84	YES	Δ(E8) [FS]			6+	6+	Top1:CA:-4:52%:inFrame,Top2:ES:7-8:24%:Frameshift,Top3:ES:8:9%:Frameshift,Top4:CA:-41:0.03%:Frameshift	1
33333735	RAD51C	NM_058216.3	NM_058216.3:c.966-2A>T	0.986	0	1	Δ(E8)	0.891	▼(E8p3)	0.059	881-nt; 940-nt	2.8%; 2.2%	complete	0.84	YES	Δ(E8) [FS]			6+	6+	Top1:CA:-4:52%:inFrame,Top2:ES:7-8:24%:Frameshift,Top3:ES:8:9%:Frameshift,Top4:CA:-41:0.03%:Frameshift	1
33333735	RAD51C	NM_058216.3	NM_058216.3:c.1026+5_1026+7del	0.986	0	1	Δ(E8); ▼(E8q41)	79.5%; 3.3%	Δ(E8q18)	0.138	881-nt; 778-nt	2%; 1.4%	complete	0.88	-	-			NA	NA	Top1:ES:7-8:24%:Frameshift,Top2:ES:8:8%:Frameshift,Top3:CD:-18:0.2%:inFrame,Top4:CD:+45:0.07%:Frameshift	1
33333735	RAD51C	NM_058216.3	NM_058216.3:c.1026+5G>T	0.986	0	1	Δ(E8); ▼(E8q44)	78.0%; 1.4%	Δ(E8q18)	0.187	881-nt	0.019	complete	0.88	YES	Δ(E8) [FS]			5+	5+	Top1:ES:7-8:24%:Frameshift,Top2:ES:8:8%:Frameshift,Top3:CD:-18:0.2%:inFrame,Top4:CD:+45:0.07%:Frameshift	1
35740625	RAD51C	NM_058216.3	WT (mgR51C_ex2-8)	0.986	0.986	0	-	-	-	-	1106 nt	0.014	NA	NA	NA	NA			NA	NA	NA	NA
35740625	RAD51C	NM_058216.3	NM_058216.3:c.146-4_146-2del	0.986	0	1	Δ(E2)	0.738	Δ(E2p3)	0.251	657nt	0.011	complete	0.93	-	-			NA	NA	Top1:CA:+3:8%:inFrame,Top2:ES:2:7%:Frameshift,Top3:CA:-29:0.3%:Frameshift,Top4:ES:2-3:0.2%:inFrame	1
35740625	RAD51C	NM_058216.3	NM_058216.3:c.146-3C>G	0.986	0	1	Δ(E2)	0.948	Δ(E2p3)	0.052	-	-	complete	0.81	YES	Δ(E2) [FS]			6+	6+	Top1:CA:+3:8%:inFrame,Top2:ES:2:7%:Frameshift,Top3:CA:-29:0.3%:Frameshift,Top4:ES:2-3:0.2%:inFrame	1
35740625	RAD51C	NM_058216.3	NM_058216.3:c.404+2T>C	0.986	0	1	▼(E2q27); Δ(E2); Δ(E2q175)	77.2%; 16.7%; 4.7%	-	-	657 nt	0.014	complete	0.97	YES	▼(E2q27) [IF,PTC]; flagged	lost site/s do not match native site	Δ(E2) [FS]	5+	6+	Top1:CD:+28:11%:inFrame,Top2:ES:2:8%:Frameshift,Top3:CD:-22:0.6%:Frameshift,Top4:CD:-175:0.5%:Frameshift	1
35740625	RAD51C	NM_058216.3	NM_058216.3:c.404+3A>G	0.986	0.263	0.733266	▼(E2q27); Δ(E2q175)	66.4%; 5.4%	-	-	657 nt	0.019	intermediate	0.61	YES	▼(E2q27) [IF,PTC]; flagged	lost site/s do not match native site	Δ(E2) [FS]	5+	5+	Top1:CD:+28:11%:inFrame,Top2:ES:2:8%:Frameshift,Top3:CD:-22:0.6%:Frameshift,Top4:CD:-175:0.5%:Frameshift	1
35740625	RAD51C	NM_058216.3	NM_058216.3:c.405-1G>C	0.986	0	1	Δ(E3p7); Δ(E3)	48.9%; 48.2%	-	-	813 nt	0.029	complete	0.99	YES	Δ(E3p7) [FS]; Δ(E3) [FS]			6+	6+	Top1:ES:3:23%:Frameshift,Top2:ES:3-4:3%:Frameshift,Top3:CA:-213:0.3%:Frameshift,Top4:ES:2-3:0.2%:inFrame	1
35740625	RAD51C	NM_058216.3	NM_058216.3:c.571+1del	0.986	0	1	Δ(E3q1)	0.984	-	-	800 nt	0.016	complete	0.99	-	-			NA	NA	Top1:ES:3:25%:Frameshift,Top2:ES:3-4:4%:Frameshift,Top3:CD:-114:1%:inFrame,Top4:ES:2-3:0.2%:inFrame	0
35740625	RAD51C	NM_058216.3	NM_058216.3:c.572-3C>G	0.986	0	1	Δ(E4)	0.947	-	-	1063 nt; 1008 nt	3.0%; 2.3%	complete	0.99	YES	Δ(E4) [FS]			6+	6+	Top1:ES:4:12%:Frameshift,Top2:CA:+81:6%:inFrame,Top3:ES:3-4:4%:Frameshift,Top4:ES:4-5:2%:Frameshift	1
35740625	RAD51C	NM_058216.3	NM_058216.3:c.572-1G>C	0.986	0	1	Δ(E4)	0.938	-	-	1008 nt; 1063 nt; 976 nt	3.2%; 1.5%; 1.5%	complete	0.99	YES	Δ(E4) [FS]			6+	6+	Top1:ES:4:12%:Frameshift,Top2:CA:+81:6%:inFrame,Top3:ES:3-4:4%:Frameshift,Top4:ES:4-5:2%:Frameshift	1
35740625	RAD51C	NM_058216.3	NM_058216.3:c.705+1G>A	0.986	0	1	Δ(E4)	100%	-	-	-	-	complete	1	YES	Δ(E4) [FS]			6+	6+	Top1:ES:4:12%:Frameshift,Top2:ES:3-4:4%:Frameshift,Top3:ES:4-5:1%:Frameshift,Top4:CD:+276:0.02%:Frameshift	1
35740625	RAD51C	NM_058216.3	NM_058216.3:c.705+3A>G	0.986	0.213	0.783976	Δ(E4)	0.787	-	-	-	-	intermediate	0.44	NO	no aberrant transcript			1-	1-	-	-
35740625	RAD51C	NM_058216.3	NM_058216.3:c.706-1G>T	0.986	0	1	Δ(E5p10)	100%	-	-	-	-	complete	1	YES	Δ(E5p10) [FS]; Δ(E5) [IF]			6+	6+	Top1:ES:5:2%:inFrame,Top2:ES:4-5:1%:Frameshift,Top3:CA:-275:0.2%:Frameshift,Top4:ES:5-6:0.1%:Frameshift	0
35740625	RAD51C	NM_058216.3	NM_058216.3:c.837+1G>T	0.986	0	1	-	-	Δ(E5)	0.953	976 nt	0.047	complete	1	YES	Δ(E5) [IF]			6+	6+	Top1:ES:5:2%:inFrame,Top2:ES:4-5:1%:Frameshift,Top3:ES:5-6:0.1%:Frameshift,Top4:CD:-58:0.006%:Frameshift	1
35740625	RAD51C	NM_058216.3	NM_058216.3:c.837+4_837+7del	0.986	0	1	-	-	Δ(E5)	100%	-	-	complete	1	-	-			NA	NA	Top1:ES:5:2%:inFrame,Top2:ES:4-5:1%:Frameshift,Top3:ES:5-6:0.1%:Frameshift,Top4:CD:-58:0.006%:Frameshift	1
35740625	RAD51C	NM_058216.3	NM_058216.3:c.838-2A>G	0.986	0	1	Δ(E6)	0.984	-	-	590 nt	0.016	complete	0.97	YES	Δ(E6) [FS]			6+	6+	Top1:CA:-231:24%:Frameshift,Top2:ES:6:11%:Frameshift,Top3:ES:6-7:10%:Frameshift,Top4:CA:-259:0.3%:inFrame	1
35740625	RAD51C	NM_058216.3	NM_058216.3:c.904G>A	0.986	0.024	0.975659	▼(E6q4)	0.976	-	-	-	-	high	0.62	YES	▼(E6q4) [FS]; Δ(E6) [FS]			6+	6+	Top1:ES:6:11%:Frameshift,Top2:ES:6-7:10%:Frameshift,Top3:CD:+5:0.1%:Frameshift,Top4:ES:5-6:0.1%:Frameshift	1
35740625	RAD51C	NM_058216.3	NM_058216.3:c.904+1G>T	0.986	0	1	▼(E6q4)	100%	-	-	-	-	complete	0.98	YES	Δ(E6) [FS]			3+	3+	Top1:ES:6:11%:Frameshift,Top2:ES:6-7:10%:Frameshift,Top3:CD:+5:0.1%:Frameshift,Top4:ES:5-6:0.1%:Frameshift	1
35740625	RAD51C	NM_058216.3	NM_058216.3:c.905-3_906del	0.986	0	1	Δ(E7)	100%	-	-	-	-	complete	0.91	-	-			NA	NA	-	-
35740625	RAD51C	NM_058216.3	NM_058216.3:c.905-2del	0.986	0	1	Δ(E7)	100%	-	-	-	-	complete	0.91	-	-			NA	NA	Top1:ES:7:48%:Frameshift,Top2:ES:7-8:24%:Frameshift,Top3:ES:6-7:10%:Frameshift,Top4:CA:-23:0.5%:Frameshift	1
35740625	RAD51C	NM_058216.3	NM_058216.3:c.965+1G>A	0.986	0	1	Δ(E7)	100%	-	-	-	-	complete	0.94	YES	Δ(E7) [FS]			6+	6+	Top1:ES:7:48%:Frameshift,Top2:ES:7-8:24%:Frameshift,Top3:ES:6-7:10%:Frameshift,Top4:CD:+5:0.04%:Frameshift	1
35740625	RAD51C	NM_058216.3	NM_058216.3:c.966-1G>C	0.986	0	1	Δ(E8)	0.206	▼(E8p3)	0.794	-	-	complete	0.84	YES	Δ(E8) [FS]			5+	5+	Top1:CA:-4:52%:inFrame,Top2:ES:7-8:24%:Frameshift,Top3:ES:8:9%:Frameshift,Top4:CA:-41:0.03%:Frameshift	1
34200360	RAD51D	NM_002878.4	WT (mgR51D_ex2-9) Primers V1-ex9	0.578	0.578	0	∆(E4_E5); ∆(E3_E7); ∆(E2_E5)	13.8%; 9.9%; 5.2%	∆(E3_E5)	0.133	-	-	NA	NA	NA	NA			NA	NA	NA	NA
34200360	RAD51D	NM_002878.4	NM_002878.4:c.83-2A>G	0.578	0	1	∆(E2_E5); ∆(E2); ∆(E2_E3)	41.9%; 39.6%; 9.6%	-	-	487-nt	0.09	complete	0.97	YES	Δ(E2p21) [IF]; Δ(E2) [FS]			5+	5+	Top1:ES:2-3:3%:Frameshift,Top2:ES:2:0.9%:Frameshift,Top3:CA:+21:0.05%:inFrame,Top4:CA:-70:0.007%:inFrame	1
34200360	RAD51D	NM_002878.4	NM_002878.4:c.83-4_83-3delinsAG	0.578	0	1	▼(E2p2); ∆(E2_E5); ∆(E2)	54.2%; 38.6%; 7.2%	-	-	-	-	complete	0.93	-	-			NA	NA	-	-
34200360	RAD51D	NM_002878.4	WT (mgR51D_ex2-9) Primers ex2-V2	0.731	0.731	0	∆(E4_E5)	0.094	∆(E3_E5)	0.175	-	-	NA	NA	NA	NA			NA	NA	NA	NA
34200360	RAD51D	NM_002878.4	NM_002878.4:c.145-2A>G	0.731	0	1	∆(E3)	0.555	∆(E3_E5)	0.445	-	-	complete	0.95	YES	Δ(E3) [FS]			5+	5+	Top1:ES:3:85%:Frameshift,Top2:ES:3-4:12%:inFrame,Top3:ES:2-3:3%:Frameshift,Top4:CA:-19:0.1%:inFrame	1
34200360	RAD51D	NM_002878.4	NM_002878.4:c.263+6T>C	0.731	0.49	0.329685	∆(E3)	0.156	∆(E3_E5)	0.354	-	-	intermediate	0.15	NO	no aberrant transcript			1-	1-	-	-
34200360	RAD51D	NM_002878.4	NM_002878.4:c.343C>T	0.731	0.034	0.953488	∆(E4); ∆(E4_E5)	45.7%; 28.1%	∆(E3_E5)	0.227	-	-	high	0.75	YES	Δ(E4) [FS]			5+	5+	Top1:ES:4-5:25%:Frameshift,Top2:ES:3-4:10%:inFrame,Top3:ES:4:8%:Frameshift,Top4:CD:-17:2%:Frameshift	1
34200360	RAD51D	NM_002878.4	NM_002878.4:c.345+2T>C	0.731	0	1	∆(E4); ∆(E4_E5)	49.6%; 26.4%	∆(E3_E5)	0.24	-	-	complete	0.92	YES	Δ(E4) [FS]			5+	5+	Top1:ES:4-5:25%:Frameshift,Top2:ES:3-4:10%:inFrame,Top3:ES:4:8%:Frameshift,Top4:CD:-17:2%:Frameshift	1
34200360	RAD51D	NM_002878.4	NM_002878.4:c.480+1G>A	0.731	0	1	∆(E4_E5)	0.292	∆(E3_E5); ∆(E5)	41.2%; 29.6%	-	-	complete	0.98	YES	Δ(E5) [IF]			5+	5+	Top1:ES:5:39%:inFrame,Top2:ES:4-5:25%:Frameshift,Top3:ES:5-6:0.3%:inFrame,Top4:CD:-135:0.02%:inFrame	1
34200360	RAD51D	NM_002878.4	NM_002878.4:c.476_480+1dup	0.731	0	1	∆(E4_E5); [∆(E4)▼(E5q6)]; [∆(E2)▼(E5q6)]; [∆(E3)▼(E5q6)]	8.6%; 6.3%; 4.3%; 3.6%	▼(E5q6) [6nt insertion due to duplication]; ∆(E3_E5)	60.4%; 16.7%	-	-	complete	0.05	-	-			NA	NA	-	-
34200360	RAD51D	NM_002878.4	NM_002878.4:c.481-8C>A	0.731	0.004	0.994528	[∆(E4_E5)▼(E6p6)]	0.134	▼(E6p6); [∆(E3_5)▼(E6p6)]; ∆(E3_E5)	70.0%; 8.8%; 7.5%	-	-	high	1	YES	▼(E6p6) [IF]; flagged	lost site/s do not match native site	no exon skipping or intron retention	5+	5+	Top1:CA:+4:4%:Frameshift,Top2:ES:5-6:0.3%:inFrame,Top3:CA:-29:0.07%:Frameshift,Top4:ES:6:0.04%:inFrame	0
34200360	RAD51D	NM_002878.4	NM_002878.4:c.577-2A>G	0.731	0	1	▼(E7p41); ∆(E7)	65.5%; 14.3%	∆(E6_E9)	0.202	-	-	complete	0.99	YES	Δ(E7p16) [FS]; Δ(E7) [FS]			4+	4+	Top1:ES:7-8:10%:inFrame,Top2:ES:7:0.2%:Frameshift,Top3:CA:-527:0.1%:Frameshift,Top4:CA:-507:0.03%:Frameshift	0
34200360	RAD51D	NM_002878.4	NM_002878.4:c.738+1G>A	0.731	0	1	▼(E8q43); ∆(E8); ∆(E4_E7)	27.9%; 51.1%; 10.9%	-	-	1363-nt	0.101	complete	0.95	YES	Δ(E8) [FS]			5+	5+	Top1:ES:7-8:9%:inFrame,Top2:ES:8:2%:Frameshift,Top3:CD:-3:0.2%:inFrame,Top4:CD:+38:0.1%:Frameshift	1
34846068	PALB2	NM_024675.4	WT (mgPB2_ex1-3)	1	1	0	-	-	-	-	-	-	NA	NA	NA	NA			NA	NA	NA	NA
34846068	PALB2	NM_024675.4	NM_024675.4:c.47A>G	1	0	1	∆(E1q17)	100%	-	-	-	-	complete	0.92	YES	Δ(E1q169) [impacts native start site]			3+	3+	Top1:CD:-17:11%:Frameshift,Top2:CD:+450:3%:Frameshift,Top3:CD:-169:0.6%:Frameshift,Top4:CD:+338:0.6%:Frameshift	1
34846068	PALB2	NM_024675.4	NM_024675.4:c.48G>A	1	0.009	0.991	∆(E1q17); ▼(I1-mg)	88.6%; 5%	▼(E1q9)	0.054	-	-	high	0.94	YES	▼(E1q9) [IF]			4+	4+	Top1:CD:-17:11%:Frameshift,Top2:CD:+450:3%:Frameshift,Top3:CD:-169:0.6%:Frameshift,Top4:CD:+338:0.6%:Frameshift	1
34846068	PALB2	NM_024675.4	NM_024675.4:c.48+1G>A	1	0	1	∆(E1q17); ▼(I1-mg)	77.0%; 13.8%	▼(E1q9)	9.2%	-	-	complete	0.94	YES	▼(E1q9) [IF]			4+	4+	Top1:CD:-17:11%:Frameshift,Top2:CD:+450:3%:Frameshift,Top3:CD:-169:0.6%:Frameshift,Top4:CD:+338:0.6%:Frameshift	1
34846068	PALB2	NM_024675.4	NM_024675.4:c.48+2T>C	1	0	1	∆(E1q17)	100%	-	-	-	-	complete	0.94	YES	▼(E1q9) [IF]			3+	3+	Top1:CD:-17:11%:Frameshift,Top2:CD:+450:3%:Frameshift,Top3:CD:-169:0.6%:Frameshift,Top4:CD:+338:0.6%:Frameshift	1
34846068	PALB2	NM_024675.4	NM_024675.4:c.48+4C>T	1	0.945	0.055	∆(E1q17)	0.055	-	-	-	-	low	0.14	NO	no aberrant transcript			2-	2-	-	-
34846068	PALB2	NM_024675.4	NM_024675.4:c.48+7G>C	1	1	0	-	-	-	-	-	-	no aberration	0.37	YES	▼(E1q9) [IF]			0+	0+	-	-
34846068	PALB2	NM_024675.4	NM_024675.4:c.49-2A>T	1	0	1	-	-	∆(E2p6)	100%	-	-	complete	0.97	YES	Δ(E2p6) [IF]; Δ(E2) [IF]			6+	6+	Top1:CA:-464:27%:Frameshift,Top2:ES:2:0.5%:inFrame,Top3:CA:+6:0.2%:inFrame,Top4:CA:-27:0.09%:Frameshift	1
34846068	PALB2	NM_024675.4	NM_024675.4:c.108+1G>A	1	0	1	-	-	∆(E2)	100%	-	-	complete	0.98	YES	Δ(E2) [IF]			6+	6+	Top1:ES:2:0.4%:inFrame,Top2:ES:2-3:0.007%:Frameshift,Top3:CD:+5:0.001%:Frameshift	1
34846068	PALB2	NM_024675.4	NM_024675.4:c.108+2T>C	1	0.855	0.145	-	-	∆(E2)	0.145	-	-	low	0.31	YES, flagged	flagged	lost site/s do not match native site	Δ(E2) [IF]	1+	2+	Top1:ES:2:0.4%:inFrame,Top2:ES:2-3:0.007%:Frameshift,Top3:CD:+5:0.001%:Frameshift	0
34846068	PALB2	NM_024675.4	NM_024675.4:c.109-6_109-4del	1	1	0	-	-	-	-	-	-	no aberration	0.07	-	-			NA	NA	-	-
34846068	PALB2	NM_024675.4	NM_024675.4:c.109-2A>G	1	0	1	∆(E3); ∆(E3p11)	41%; 59%	-	-	-	-	complete	1	YES	Δ(E3p11) [FS]; Δ(E3) [FS]			6+	6+	Top1:CA:-37:7%:inFrame,Top2:ES:3-4:0.2%:Frameshift,Top3:ES:3:0.2%:Frameshift,Top4:CA:+11:0.07%:Frameshift	1
34846068	PALB2	NM_024675.4	NM_024675.4:c.211+1G>A	1	0	1	∆(E3)	0.457	▼(E3q48)	0.543	-	-	complete	1	YES	▼(E3q48) [IF]; Δ(E3) [FS]			6+	6+	Top1:ES:3-4:0.2%:Frameshift,Top2:ES:3:0.2%:Frameshift,Top3:CD:+49:0.02%:inFrame,Top4:ES:2-3:0.007%:Frameshift	1
34846068	PALB2	NM_024675.4	NM_024675.4:c.211+5del	1	1	0	-	-	-	-	-	-	no aberration	0.03	-	-			NA	NA	-	-
34846068	PALB2	NM_024675.4	WT (mgPB2_ex4-6)	1	1	0	-	-	-	-	-	-	NA	NA	NA	NA			NA	NA	NA	NA
34846068	PALB2	NM_024675.4	NM_024675.4:c.1684+4A>G	1	0.417	0.583	-	-	∆(E4)	0.583	-	-	intermediate	0.39	YES, flagged	flagged	lost site/s do not match native site	no exon skipping or intron retention	1-	1-	Top1:ES:4-5:3%:Frameshift,Top2:ES:4:0.5%:inFrame,Top3:ES:3-4:0.2%:Frameshift,Top4:CD:+592:0.1%:inFrame	1
34846068	PALB2	NM_024675.4	NM_024675.4:c.1685-2A>C	1	0	1	∆(E5p139); ∆(E5p5); ▼(E5p88); ∆(E5p10); ∆(E5p97)	67.0%; 15.4%; 6.3%; 5.7%; 5.5%	-	-	-	-	complete	0.99	YES	Δ(E5p139) [FS]; flagged	lost site/s do not match native site	no exon skipping or intron retention	5+	5+	Top1:CA:+139:4%:Frameshift,Top2:ES:4-5:3%:Frameshift,Top3:CA:+510:0.2%:inFrame,Top4:ES:5-6:0.09%:Frameshift	1
34846068	PALB2	NM_024675.4	NM_024675.4:c.1685-2A>G	1	0	1	∆(E5p139); ▼(E5p88); ∆(E5p10); ∆(E5p97); ∆(E5p5)	73.3%; 8.8%; 7.3%; 6.7%; 4.0%	-	-	-	-	complete	0.99	YES	Δ(E5p139) [FS]; flagged	lost site/s do not match native site	no exon skipping or intron retention	5+	5+	Top1:CA:+139:4%:Frameshift,Top2:ES:4-5:3%:Frameshift,Top3:CA:+510:0.2%:inFrame,Top4:ES:5-6:0.09%:Frameshift	1
34846068	PALB2	NM_024675.4	NM_024675.4:c.2513A>C	1	0.731	0.269	▼(I5); ▼(E5q106)	21.2%; 5.7%	-	-	-	-	intermediate	0.44	YES	▼(E5q106) [FS]; ▼(I5)			5+	5+	Top1:ES:4-5:3%:Frameshift,Top2:CD:+107:0.2%:Frameshift,Top3:ES:5-6:0.08%:Frameshift,Top4:ES:5:0.07%:Frameshift	0
34846068	PALB2	NM_024675.4	NM_024675.4:c.2515-2A>G	1	0	1	▼(I5)	100%	-	-	-	-	complete	0.97	YES	Δ(E6) [IF]			3+	3+	Top1:ES:6:1%:inFrame,Top2:CA:-29:0.6%:Frameshift,Top3:ES:5-6:0.08%:Frameshift,Top4:ES:6-7:0.03%:inFrame	0
34846068	PALB2	NM_024675.4	WT (mgPB2_ex5-12)	1	1	0	-	-	-	-	-	-	NA	NA	NA	NA			NA	NA	NA	NA
34846068	PALB2	NM_024675.4	NM_024675.4:c.2586+4A>T	1	1	0	-	-	-	-	-	-	no aberration	0.21	YES	Δ(E6) [IF]			0+	0+	Top1:ES:6:1%:inFrame,Top2:ES:5-6:0.08%:Frameshift,Top3:ES:6-7:0.03%:inFrame,Top4:CD:-7:0.0006%:Frameshift	0
34846068	PALB2	NM_024675.4	NM_024675.4:c.2587-2A>G	1	0	1	∆(E7p10)	100%	-	-	-	-	complete	0.68	YES	Δ(E7p10) [FS]			6+	6+	Top1:CA:+10:14%:Frameshift,Top2:ES:7:13%:inFrame,Top3:CA:+25:0.3%:Frameshift,Top4:CA:-43:0.2%:inFrame	1
34846068	PALB2	NM_024675.4	NM_024675.4:c.2748+1G>T	1	0	1	-	-	∆(E7)	100%	-	-	complete	0.73	YES	Δ(E7) [IF]			6+	6+	Top1:ES:7:13%:inFrame,Top2:ES:7-8:0.06%:Frameshift,Top3:ES:6-7:0.03%:inFrame,Top4:CD:+565:0.01%:inFrame	1
34846068	PALB2	NM_024675.4	NM_024675.4:c.2748+2dup	1	0	1	-	-	∆(E7)	83.7%	592‐nt; 710‐nt	8.9%; 7.4%	complete	0.72	-	-			NA	NA	Top1:ES:7:13%:inFrame,Top2:ES:7-8:0.06%:Frameshift,Top3:ES:6-7:0.03%:inFrame,Top4:CD:+565:0.01%:inFrame	1
34846068	PALB2	NM_024675.4	NM_024675.4:c.2748+4A>T	1	1	0	-	-	-	-	-	-	no aberration	0.42	YES	Δ(E7) [IF]			0+	0+	Top1:ES:7:13%:inFrame,Top2:ES:7-8:0.06%:Frameshift,Top3:ES:6-7:0.03%:inFrame,Top4:CD:+565:0.01%:inFrame	0
34846068	PALB2	NM_024675.4	NM_024675.4:c.2749-1G>T	1	0	1	∆(E8p7)	0.969	∆(E8p15)	0.031	-	-	complete	0.97	YES	Δ(E8p7) [FS]; Δ(E8) [FS]			6+	6+	Top1:ES:8-9:0.5%:Frameshift,Top2:ES:8:0.4%:Frameshift,Top3:ES:7-8:0.06%:Frameshift,Top4:CA:-31:0.04%:inFrame	0
34846068	PALB2	NM_024675.4	NM_024675.4:c.2750T>C	1	1	0	-	-	-	-	-	-	no aberration	0.09	NO	no aberrant transcript			3-	3-	-	-
34846068	PALB2	NM_024675.4	NM_024675.4:c.2834G>C	1	0.9	0.1	∆(E8); ▼(E8q69)	7.8%; 2.2%	-	-	-	-	low	0.57	YES	Δ(E8) [FS]			2+	2+	Top1:ES:8-9:0.5%:Frameshift,Top2:ES:8:0.5%:Frameshift,Top3:ES:7-8:0.06%:Frameshift,Top4:CD:+70:0.01%:inFrame	0
34846068	PALB2	NM_024675.4	NM_024675.4:c.2834+1G>A	1	0	1	∆(E8); ▼(E8q69)	82.1%; 17.9%	-	-	-	-	complete	0.98	YES	Δ(E8) [FS]			6+	6+	Top1:ES:8-9:0.5%:Frameshift,Top2:ES:8:0.5%:Frameshift,Top3:ES:7-8:0.06%:Frameshift,Top4:CD:+70:0.01%:inFrame	1
34846068	PALB2	NM_024675.4	NM_024675.4:c.2834+3A>G	1	0.802	0.198	∆(E8)	0.198	-	-	-	-	low	0.43	YES	Δ(E8) [FS]			2+	2+	Top1:ES:8-9:0.5%:Frameshift,Top2:ES:8:0.5%:Frameshift,Top3:ES:7-8:0.06%:Frameshift,Top4:CD:+70:0.01%:inFrame	0
34846068	PALB2	NM_024675.4	NM_024675.4:c.2834+5G>A	1	0.407	0.593	∆(E8)	0.593	-	-	-	-	intermediate	0.76	YES	Δ(E8) [FS]			5+	5+	Top1:ES:8-9:0.5%:Frameshift,Top2:ES:8:0.5%:Frameshift,Top3:ES:7-8:0.06%:Frameshift,Top4:CD:+70:0.01%:inFrame	1
34846068	PALB2	NM_024675.4	NM_024675.4:c.2834+6T>C	1	1	0	-	-	-	-	-	-	no aberration	0.17	NO	no aberrant transcript			3-	3-	-	-
34846068	PALB2	NM_024675.4	NM_024675.4:c.2996+4A>G	1	0.129	0.871	-	-	∆(E9)	0.871	-	-	high	0.6	YES	Δ(E9) [IF]			6+	6+	Top1:ES:9:2%:inFrame,Top2:ES:9-10:1%:inFrame,Top3:ES:8-9:0.5%:Frameshift,Top4:CD:-18:0.003%:inFrame	1
34846068	PALB2	NM_024675.4	NM_024675.4:c.2997-2del	1	0	1	∆(E10p2)	0.666	∆(E10)	0.333	-	-	complete	0.99	-	-			NA	NA	Top1:ES:9-10:1%:inFrame,Top2:ES:10:1%:inFrame,Top3:CA:+2:0.4%:Frameshift,Top4:ES:10-11:0.04%:Frameshift	1
34846068	PALB2	NM_024675.4	NM_024675.4:c.2997-1G>A	1	0	1	∆(E10p2)	0.958	-	-	-	-	complete	0.99	YES	Δ(E10p2) [FS]; Δ(E10) [IF]			6+	6+	Top1:ES:9-10:1%:inFrame,Top2:ES:10:1%:inFrame,Top3:CA:+2:0.4%:Frameshift,Top4:ES:10-11:0.04%:Frameshift	1
34846068	PALB2	NM_024675.4	NM_024675.4:c.3113G>A	1	0.105	0.895	∆(E10q31); ∆(E10q41)	52.9%; 2.2%	∆(E10); ∆(E9_E10)	28.1%; 6.3%	-	-	high	0.74	YES	Δ(E10) [IF]			5+	5+	Top1:ES:9-10:1%:inFrame,Top2:ES:10:1%:inFrame,Top3:CD:-31:0.2%:Frameshift,Top4:ES:10-11:0.04%:Frameshift	1
34846068	PALB2	NM_024675.4	NM_024675.4:c.3113+3A>G	1	0.08	0.92	∆(E10q31); ∆(E10q65)	62.7%; 4.9%	∆(E10); ∆(E9_E10)	19.9%; 4.5%	-	-	high	0.05	NO	no aberrant transcript			0-	0-	-	-
34846068	PALB2	NM_024675.4	NM_024675.4:c.3113+5G>C	1	0.049	0.951	∆(E10q31); ∆(E10q41); ∆(E10q65)	90.0%; 2.8%; 2.3%	-	-	-	-	high	0.47	YES	Δ(E10) [IF]			3+	3+	Top1:ES:9-10:1%:inFrame,Top2:ES:10:1%:inFrame,Top3:CD:-31:0.2%:Frameshift,Top4:ES:10-11:0.04%:Frameshift	1
34846068	PALB2	NM_024675.4	NM_024675.4:c.3201+1G>A	1	0	1	∆(E11)	100%	-	-	-	-	complete	0.96	YES	Δ(E11) [FS]			6+	6+	Top1:ES:11:27%:Frameshift,Top2:ES:11-12:18%:inFrame,Top3:ES:10-11:0.04%:Frameshift,Top4:CD:-27:0.001%:inFrame	1
34846068	PALB2	NM_024675.4	NM_024675.4:c.3201+3_3201+4insTG	1	0	1	∆(E11)	100%	-	-	-	-	complete	0.89	-	-			NA	NA	-	-
34846068	PALB2	NM_024675.4	NM_024675.4:c.3201+6T>A	1	0.115	0.885	∆(E11)	0.885	-	-	-	-	high	0.32	YES	Δ(E11) [FS]			6+	6+	Top1:ES:11:27%:Frameshift,Top2:ES:11-12:18%:inFrame,Top3:ES:10-11:0.04%:Frameshift,Top4:CD:-27:0.001%:inFrame	1
34846068	PALB2	NM_024675.4	NM_024675.4:c.3348C>T	1	0.68	0.32	∆(E12q4); ∆(E12)	26.7%; 5.3%	-	-	-	-	intermediate	0.32	YES	Δ(E12) [FS]			4+	4+	-	-
34846068	PALB2	NM_024675.4	NM_024675.4:c.3350+4A>G	1	0	1	▼(E12q4); ∆(E12)	56.1%; 43.9%	-	-	-	-	complete	0.39	YES	Δ(E12) [FS]			5+	5+	-	-
34846068	PALB2	NM_024675.4	NM_024675.4:c.3350+5G>A	1	0	1	∆(E12)	100%	-	-	-	-	complete	0.44	YES	Δ(E12) [FS]			6+	6+	-	-
36139699	PALB2	NM_024675.4	WT (mgPB2_ex1-3)	1	1	0	-	-	-	-	-	-	NA	NA	NA	NA			NA	NA	NA	NA
36139699	PALB2	NM_024675.4	NM_024675.4:c.46A>G	1	0.925	0.075	∆(E1q17)	0.075	-	-	-	-	low	0.27	NO	no aberrant transcript			2-	2-	-	-
36139699	PALB2	NM_024675.4	NM_024675.4:c.48+1del	1	0	1	∆(E1q17)	100%	-	-	-	-	complete	0.94	-	-			NA	NA	Top1:CD:-17:11%:Frameshift,Top2:CD:+450:3%:Frameshift,Top3:CD:-169:0.6%:Frameshift,Top4:CD:+338:0.6%:Frameshift	1
36139699	PALB2	NM_024675.4	NM_024675.4:c.48+1G>C	1	0	1	∆(E1q17)	0.908	▼(E1q9)	0.092	-	-	complete	0.94	YES	▼(E1q9) [IF]			4+	4+	Top1:CD:-17:11%:Frameshift,Top2:CD:+450:3%:Frameshift,Top3:CD:-169:0.6%:Frameshift,Top4:CD:+338:0.6%:Frameshift	1
36139699	PALB2	NM_024675.4	NM_024675.4:c.48+1G>T	1	0	1	∆(E1q17)	100%	-	-	-	-	complete	0.94	YES	▼(E1q9) [IF]			3+	3+	Top1:CD:-17:11%:Frameshift,Top2:CD:+450:3%:Frameshift,Top3:CD:-169:0.6%:Frameshift,Top4:CD:+338:0.6%:Frameshift	1
36139699	PALB2	NM_024675.4	NM_024675.4:c.48+2T>G	1	0	1	∆(E1q17)	100%	-	-	-	-	complete	0.94	NO	no aberrant transcript			0-	0-	Top1:CD:-17:11%:Frameshift,Top2:CD:+450:3%:Frameshift,Top3:CD:-169:0.6%:Frameshift,Top4:CD:+338:0.6%:Frameshift	1
36139699	PALB2	NM_024675.4	NM_024675.4:c.48+5C>T	1	1	0	-	-	-	-	-	-	no aberration	0.04	NO	no aberrant transcript			3-	3-	-	-
36139699	PALB2	NM_024675.4	NM_024675.4:c.49-2del	1	0	1	-	-	∆(E2p6)	100%	-	-	complete	0.98	-	-			NA	NA	Top1:CA:-464:27%:Frameshift,Top2:ES:2:0.5%:inFrame,Top3:CA:+6:0.2%:inFrame,Top4:CA:-27:0.09%:Frameshift	1
36139699	PALB2	NM_024675.4	NM_024675.4:c.49-1del	1	0	1	-	-	∆(E2p6)	100%	-	-	complete	0.98	-	-			NA	NA	Top1:CA:-464:27%:Frameshift,Top2:ES:2:0.5%:inFrame,Top3:CA:+6:0.2%:inFrame,Top4:CA:-27:0.09%:Frameshift	1
36139699	PALB2	NM_024675.4	NM_024675.4:c.49-1G>A	1	0	1	-	-	∆(E2p6)	100%	-	-	complete	0.98	YES	Δ(E2p6) [IF]; Δ2 [IF]			6+	6+	Top1:CA:-464:27%:Frameshift,Top2:ES:2:0.5%:inFrame,Top3:CA:+6:0.2%:inFrame,Top4:CA:-27:0.09%:Frameshift	1
36139699	PALB2	NM_024675.4	NM_024675.4:c.108+1_108+2insC	1	0	1	-	-	∆(E2)	100%	-	-	complete	0.99	-	-			NA	NA	Top1:ES:2:0.4%:inFrame,Top2:ES:2-3:0.007%:Frameshift,Top3:CD:+5:0.001%:Frameshift	1
36139699	PALB2	NM_024675.4	NM_024675.4:c.108+5G>A	1	1	0	-	-	-	-	-	-	no aberration	0.16	NO	no aberrant transcript			3-	3-	-	-
36139699	PALB2	NM_024675.4	NM_024675.4:c.109-2A>C	1	0	1	∆(E3p11); ∆(E3)	85.0%; 15.0%	-	-	-	-	complete	1	YES	Δ(E3p11) [FS]; Δ(E3) [FS]			6+	6+	Top1:CA:-37:7%:inFrame,Top2:ES:3-4:0.2%:Frameshift,Top3:ES:3:0.2%:Frameshift,Top4:CA:+11:0.07%:Frameshift	1
36139699	PALB2	NM_024675.4	NM_024675.4:c.210A>G	1	1	0	-	-	-	-	-	-	no aberration	0.25	NO	no aberrant transcript			3-	3-	-	-
36139699	PALB2	NM_024675.4	NM_024675.4:c.210A>C	1	1	0	-	-	-	-	-	-	no aberration	0.28	NO	no aberrant transcript			3-	3-	-	-
36139699	PALB2	NM_024675.4	NM_024675.4:c.211+1G>T	1	0	1	∆(E3)	0.733	▼(E3q48)	0.267	-	-	complete	1	YES	▼(E3q48) [IF]; Δ(E3) [FS]			6+	6+	Top1:ES:3-4:0.2%:Frameshift,Top2:ES:3:0.2%:Frameshift,Top3:CD:+49:0.02%:inFrame,Top4:ES:2-3:0.007%:Frameshift	1
36139699	PALB2	NM_024675.4	NM_024675.4:c.211+2T>C	1	0	1	∆(E3)	0.481	▼(E3q48)	0.519	-	-	complete	0.99	YES	▼(E3q48) [IF]; Δ(E3) [FS]			6+	6+	Top1:ES:3-4:0.2%:Frameshift,Top2:ES:3:0.2%:Frameshift,Top3:CD:+49:0.02%:inFrame,Top4:ES:2-3:0.007%:Frameshift	1
35716007	ATM	NM_000051.4	WT (mgATM_ex4-9)	0.657	0.657	0	∆(E7)	0.342	-	-	-	-	NA	NA	NA	NA			NA	NA	NA	NA
35716007	ATM	NM_000051.4	NM_000051.4:c.332-5A>G	0.657	0.4	0.391172	∆(E7); [▼(E5p4)∆(E7]; ∆(E5,E7)	36.7%; 16.9%; 6.4%	-	-	-	-	intermediate	0.4	YES	Δ(E5) [IF]			3+	3+	Top1:ES:5:24%:inFrame,Top2:CA:+3:0.1%:inFrame,Top3:CA:+51:0.04%:inFrame,Top4:ES:5-6:0.04%:Frameshift	0
35716007	ATM	NM_000051.4	NM_000051.4:c.332-1G>A	0.657	0	1	∆(E5,E7); ∆(E5p1)	36.6%; 19.8%	∆(E5)	0.436	-	-	complete	0.93	YES	Δ(E5) [IF]			5+	5+	Top1:ES:5:24%:inFrame,Top2:CA:+3:0.1%:inFrame,Top3:CA:+51:0.04%:inFrame,Top4:ES:5-6:0.04%:Frameshift	1
35716007	ATM	NM_000051.4	NM_000051.4:c.496G>A	0.657	0.718	-0.0928463	∆(E7)	0.282	-	-	-	-	no aberration	0.66	YES	Δ(E5) [IF]			0+	0+	Top1:ES:5:25%:inFrame,Top2:CD:+335:0.9%:Frameshift,Top3:CD:+339:0.3%:Frameshift,Top4:CD:+287:0.3%:Frameshift	0
35716007	ATM	NM_000051.4	NM_000051.4:c.496+5G>A	0.657	0.252	0.616438	∆(E7); ∆(E5,E7)	5.7%; 33.0%	∆(E5)	0.361	-	-	intermediate	0.82	YES	Δ(E5) [IF]			5+	5+	Top1:ES:5:25%:inFrame,Top2:CD:+335:0.9%:Frameshift,Top3:CD:+339:0.3%:Frameshift,Top4:CD:+287:0.3%:Frameshift	1
35716007	ATM	NM_000051.4	NM_000051.4:c.901G>T	0.657	0	1	∆(E7)	0.91	-	-	970-nt	0.09	complete	0.94	YES	Δ(E7) [FS]			6+	6+	Top1:ES:7:13%:Frameshift,Top2:ES:6-7:8%:inFrame,Top3:ES:7-8:0.3%:Frameshift,Top4:CD:-219:0.0006%:inFrame	1
35716007	ATM	NM_000051.4	NM_000051.4:c.901+2T>C	0.657	0	1	∆(E7)	1	-	-	-	-	complete	0.99	YES	Δ(E7) [FS]			6+	6+	Top1:ES:7:13%:Frameshift,Top2:ES:6-7:8%:inFrame,Top3:ES:7-8:0.3%:Frameshift,Top4:CD:-219:0.0006%:inFrame	1
35716007	ATM	NM_000051.4	NM_000051.4:c.901+3A>T	0.657	0	1	∆(E7)	0.905	-	-	970-nt	0.095	complete	0.73	YES	Δ(E7) [FS]			6+	6+	Top1:ES:7:13%:Frameshift,Top2:ES:6-7:8%:inFrame,Top3:ES:7-8:0.3%:Frameshift,Top4:CD:-219:0.0006%:inFrame	1
35716007	ATM	NM_000051.4	NM_000051.4:c.902-1G>T	0.657	0	1	∆(E8); ∆(E7_E8)	37.4%; 62.6%	-	-	-	-	complete	0.96	YES	Δ(E8) [FS]			5+	5+	Top1:ES:8:2%:Frameshift,Top2:ES:8-9:0.3%:Frameshift,Top3:ES:7-8:0.3%:Frameshift,Top4:CA:-497:0.09%:Frameshift	1
35716007	ATM	NM_000051.4	NM_000051.4:c.902G>A	0.657	0.648	0.0136986	∆(E7); ∆(E7_E8)	22.6%; 12.6%	-	-	-	-	low	0.11	NO	no aberrant transcript			2-	2-	-	-
35716007	ATM	NM_000051.4	NM_000051.4:c.903T>G	0.657	0.615	0.0639269	∆(E7); ∆(E7_E8)	21.3%; 17.2%	-	-	-	-	low	0.19	NO	no aberrant transcript			2-	2-	-	-
35716007	ATM	NM_000051.4	NM_000051.4:c.1065+1G>T	0.657	0	1	▼(E8q5); [∆(E7)▼(E8q5)]	54.8%; 45.2%	-	-	-	-	complete	0.97	YES	▼(E8q5) [FS]			5+	5+	Top1:CD:+6:8%:Frameshift,Top2:ES:8:2%:Frameshift,Top3:CD:+10:2%:inFrame,Top4:ES:8-9:0.3%:Frameshift	1
35716007	ATM	NM_000051.4	NM_000051.4:c.1065+3A>G	0.657	0.253	0.614916	∆(E7); [∆(E7)▼(E8q5)]; ∆(E7_E8); ∆(E8); ▼(E8q5)	5.7%; 8.9%; 28.8%; 6.1%; 25.2%	-	-	-	-	intermediate	0.38	YES	▼(E8q9) [IF,PTC]; Δ(E8) [FS]			4+	4+	Top1:CD:+6:8%:Frameshift,Top2:ES:8:2%:Frameshift,Top3:CD:+10:2%:inFrame,Top4:ES:8-9:0.3%:Frameshift	1
35716007	ATM	NM_000051.4	NM_000051.4:c.1066-6T>G	0.657	0.267	0.593607	∆(E9); ∆(E7,E9); ∆(E7)	44.8%; 14.9%; 3.3%	∆(E7_E9)	0.103	-	-	intermediate	0.63	YES	Δ(E9) [FS]			5+	5+	Top1:ES:9:33%:Frameshift,Top2:CA:-30:0.5%:Frameshift,Top3:ES:8-9:0.3%:Frameshift,Top4:CA:-23:0.2%:Frameshift	1
35716007	ATM	NM_000051.4	NM_000051.4:c.1235+4_1235+5del	0.657	0.451	0.313546	∆(E9); ∆(E7,E9); ∆(E7)	19.4%; 11.3%; 12.8%	∆(E7_E9)	0.114	-	-	intermediate	0.7	-	-			NA	NA	Top1:ES:9:33%:Frameshift,Top2:ES:8-9:0.3%:Frameshift,Top3:ES:9-10:0.1%:Frameshift,Top4:CD:+6:0.06%:Frameshift	0
35716007	ATM	NM_000051.4	WT (mgATM _ex11-17)	0.841	0.841	0	-	-	∆(E11)	0.159	-	-	NA	NA	NA	NA			NA	NA	NA	NA
35716007	ATM	NM_000051.4	NM_000051.4:c.1898G>T	0.841	0.626	0.255648	-	-	∆(E12)	0.374	-	-	intermediate	0.44	YES	Δ(E12) [IF]			5+	5+	Top1:ES:12:0.03%:inFrame,Top2:ES:11-12:0.003%:inFrame,Top3:ES:12-13:0.003%:Frameshift,Top4:CD:-11:0.002%:Frameshift	1
35716007	ATM	NM_000051.4	NM_000051.4:c.1898+2T>G	0.841	0.13	0.845422	-	-	∆(E12)	0.87	-	-	high	1	YES	Δ(E12q62) [FS]; Δ(E12) [IF]			6+	6+	Top1:ES:12:0.03%:inFrame,Top2:ES:11-12:0.003%:inFrame,Top3:ES:12-13:0.003%:Frameshift,Top4:CD:-11:0.002%:Frameshift	1
35716007	ATM	NM_000051.4	NM_000051.4:c.1898+3A>T	0.841	1	-0.189061	-	-	-	-	-	-	no aberration	0.41	YES	Δ(E12q62) [FS]; flagged	lost site/s do not match native site	Δ(E12) [IF]	0+	0+	-	-
35716007	ATM	NM_000051.4	NM_000051.4:c.1898+3_1898+4del	0.841	0	1	-	-	∆(E12)	1	-	-	complete	0.99	-	-			NA	NA	Top1:ES:12:0.03%:inFrame,Top2:ES:11-12:0.003%:inFrame,Top3:ES:12-13:0.003%:Frameshift,Top4:CD:-11:0.002%:Frameshift	1
35716007	ATM	NM_000051.4	NM_000051.4:c.2251-1G>C	0.841	0	1	∆(E15p19)	0.574	∆(E15); ∆(E11,E15); ∆(E15_E16)	11.7%; 18.2%; 12.7%	-	-	complete	0.97	YES	Δ(E15p19) [FS]			5+	5+	Top1:ES:15-16:9%:inFrame,Top2:CA:+19:6%:Frameshift,Top3:ES:15:0.2%:inFrame,Top4:CA:-344:0.05%:Frameshift	1
35716007	ATM	NM_000051.4	NM_000051.4:c.2376+1G>A	0.841	0	1	-	-	∆(E15); ∆(E11,E15)	81.3%; 18.7%	-	-	complete	0.96	YES	Δ(E15) [IF]			6+	6+	Top1:ES:15-16:9%:inFrame,Top2:ES:15:0.1%:inFrame,Top3:CD:-23:0.01%:Frameshift,Top4:ES:14-15:0.01%:inFrame	1
35716007	ATM	NM_000051.4	NM_000051.4:c.2376+3A>T	0.841	0	1	-	-	∆(E15); ∆(E11,E15)	80.0%; 20.0%	-	-	complete	0.78	YES	Δ(E15) [IF]			6+	6+	Top1:ES:15-16:9%:inFrame,Top2:ES:15:0.1%:inFrame,Top3:CD:-23:0.01%:Frameshift,Top4:ES:14-15:0.01%:inFrame	1
35716007	ATM	NM_000051.4	NM_000051.4:c.2377-6T>A	0.841	0.833	0.00951249	-	-	∆(E11)	0.167	-	-	low	0.11	NO	no aberrant transcript			2-	2-	-	-
35716007	ATM	NM_000051.4	NM_000051.4:c.2377-2A>G	0.841	0	1	-	-	∆(E16); ∆(E16p3); ∆(E11,E16)	45.2%; 38.7%; 16.1%	-	-	complete	0.99	YES	Δ(E16) [IF]			5+	5+	Top1:ES:16:11%:inFrame,Top2:CA:+3:10%:inFrame,Top3:ES:15-16:9%:inFrame,Top4:ES:16-17:0.5%:Frameshift	1
35716007	ATM	NM_000051.4	NM_000051.4:c.2467-3A>G	0.841	1	-0.189061	-	-	-	-	-	-	no aberration	0.17	NO	no aberrant transcript			3-	3-	-	-
35716007	ATM	NM_000051.4	NM_000051.4:c.2638+3A>G	0.841	1	-0.189061	-	-	-	-	-	-	no aberration	0.01	NO	no aberrant transcript			3-	3-	-	-
35716007	ATM	NM_000051.4	WT (mgATM _ex25-29)	1	1	0	-	-	-	-	-	-	NA	NA	NA	NA			NA	NA	NA	NA
35716007	ATM	NM_000051.4	NM_000051.4:c.3577-1G>A	1	0	1	∆(E25)	1	-	-	-	-	complete	0.99	YES	Δ(E25p1) [FS]; Δ(E25) [FS]			6+	6+	Top1:ES:25:3%:Frameshift,Top2:ES:25-26:1%:inFrame,Top3:ES:24-25:0.6%:Frameshift,Top4:CA:+13:0.01%:Frameshift	1
35716007	ATM	NM_000051.4	NM_000051.4:c.3577G>C	1	0.373	0.627	∆(E25)	0.471	∆(E25p159); ∆(E25_E26)	7.9%; 7.7%	-	-	intermediate	0.07	NO	no aberrant transcript			1-	1-	-	-
35716007	ATM	NM_000051.4	NM_000051.4:c.3746+1G>A	1	0	1	∆(E25)	1	-	-	-	-	complete	0.98	YES	Δ(E25) [FS]			6+	6+	Top1:ES:25:3%:Frameshift,Top2:ES:25-26:1%:inFrame,Top3:ES:24-25:0.7%:Frameshift,Top4:CD:+5:0.0007%:Frameshift	1
35716007	ATM	NM_000051.4	NM_000051.4:c.3746+4A>C	1	0.714	0.286	∆(E25)	0.286	-	-	-	-	intermediate	0.08	NO	no aberrant transcript			1-	1-	-	-
35716007	ATM	NM_000051.4	NM_000051.4:c.3746+5G>A	1	0	1	∆(E25)	1	-	-	-	-	complete	0.24	YES	Δ(E25) [FS]			6+	6+	Top1:ES:25:3%:Frameshift,Top2:ES:25-26:1%:inFrame,Top3:ES:24-25:0.7%:Frameshift,Top4:CD:+5:0.0007%:Frameshift	1
35716007	ATM	NM_000051.4	NM_000051.4:c.3993G>A	1	0	1	∆(E26)	0.271	∆(E26q120)	0.729	-	-	complete	0.68	YES	Δ(E26q120) [IF]			5+	5+	-	-
35716007	ATM	NM_000051.4	NM_000051.4:c.3993+1G>A	1	0	1	∆(E26)	0.327	∆(E26q120)	0.673	-	-	complete	1	YES	Δ(E26q120) [IF]; flagged	lost site/s do not match native site	no exon skipping or intron retention	5+	5+	Top1:CD:-120:4%:inFrame,Top2:ES:25-26:1%:inFrame,Top3:CD:-192:0.02%:inFrame,Top4:ES:26:0.003%:Frameshift	1
35716007	ATM	NM_000051.4	NM_000051.4:c.3993+5G>T	1	0.762	0.238	-	-	∆(E26q120)	0.238	-	-	intermediate	0.18	NO	no aberrant transcript			1-	1-	-	-
35716007	ATM	NM_000051.4	NM_000051.4:c.3994-3C>T	1	1	0	-	-	-	-	-	-	no aberration	0.09	NO	no aberrant transcript			3-	3-	-	-
35716007	ATM	NM_000051.4	NM_000051.4:c.3994-2A>G	1	0	1	∆(E27)	1	-	-	-	-	complete	0.99	YES	Δ(E27p20) [FS]; Δ(E27) [FS]			6+	6+	Top1:CA:-191:30%:Frameshift,Top2:CA:-184:0.6%:inFrame,Top3:ES:27:0.6%:Frameshift,Top4:CA:-103:0.3%:inFrame	1
35716007	ATM	NM_000051.4	NM_000051.4:c.4109+1G>T	1	0	1	∆(E27); ∆(E27q1)	83.4%; 16.6%	-	-	-	-	complete	1	YES	Δ(E27q1) [FS]; Δ(E27) [FS]			6+	6+	Top1:ES:27:0.5%:Frameshift,Top2:CD:+5:0.03%:Frameshift,Top3:CD:+149:0.006%:Frameshift,Top4:ES:26-27:0.001%:inFrame	1
35716007	ATM	NM_000051.4	NM_000051.4:c.4109+3A>G	1	0.457	0.543	∆(E27)	0.543	-	-	-	-	intermediate	0.13	NO	no aberrant transcript			1-	1-	-	-
35716007	ATM	NM_000051.4	NM_000051.4:c.4109+5G>A	1	0	1	∆(E27)	1	-	-	-	-	complete	0.83	YES	Δ(E27) [FS]			6+	6+	Top1:ES:27:0.5%:Frameshift,Top2:CD:+5:0.03%:Frameshift,Top3:CD:+149:0.006%:Frameshift,Top4:ES:26-27:0.001%:inFrame	1
35716007	ATM	NM_000051.4	NM_000051.4:c.4109+6T>G	1	0.685	0.315	∆(E27)	0.315	-	-	-	-	intermediate	0.11	NO	no aberrant transcript			1-	1-	-	-
35716007	ATM	NM_000051.4	NM_000051.4:c.4110-9C>G	1	0	1	∆(E28); ▼(E28p8)	15.2%; 84.8%	-	-	-	-	complete	0.91	YES	▼(E28p8) [FS]; Δ(E28) [FS]			6+	6+	Top1:ES:28-29:2%:inFrame,Top2:CA:+53:0.4%:Frameshift,Top3:ES:28:0.2%:Frameshift,Top4:CA:+72:0.003%:inFrame	0
35716007	ATM	NM_000051.4	NM_000051.4:c.4110-2A>C	1	0	1	∆(E28); ∆(E28p53)	84.2%; 15.8%	-	-	-	-	complete	0.99	YES	Δ(E28) [FS]			6+	6+	Top1:ES:28-29:2%:inFrame,Top2:CA:+53:0.4%:Frameshift,Top3:ES:28:0.2%:Frameshift,Top4:CA:+72:0.003%:inFrame	1
35716007	ATM	NM_000051.4	NM_000051.4:c.4236+1G>A	1	0	1	∆(E28)	1	-	-	-	-	complete	1	YES	Δ(E28) [FS]			6+	6+	Top1:ES:28-29:2%:inFrame,Top2:ES:28:0.3%:Frameshift,Top3:CD:+402:0.007%:Frameshift,Top4:CD:-84:0.002%:inFrame	1
35716007	ATM	NM_000051.4	NM_000051.4:c.4236+5G>A	1	0	1	∆(E28)	1	-	-	-	-	complete	0.98	YES	Δ(E28) [FS]			6+	6+	Top1:ES:28-29:2%:inFrame,Top2:ES:28:0.3%:Frameshift,Top3:CD:+402:0.007%:Frameshift,Top4:CD:-84:0.002%:inFrame	1
35716007	ATM	NM_000051.4	NM_000051.4:c.4236+6T>C	1	0	1	∆(E28)	1	-	-	-	-	complete	0.51	YES	Δ(E28) [FS]			6+	6+	Top1:ES:28-29:2%:inFrame,Top2:ES:28:0.3%:Frameshift,Top3:CD:+402:0.007%:Frameshift,Top4:CD:-84:0.002%:inFrame	1
35716007	ATM	NM_000051.4	NM_000051.4:c.4436+4A>G	1	0.728	0.272	∆(E29)	0.211	∆(E28_29)	0.061	-	-	intermediate	0.1	NO	no aberrant transcript			1-	1-	-	-
35716007	ATM	NM_000051.4	WT (mgATM _ex49-52)	0.758	0.758	0	-	-	∆(E52)	0.242	-	-	NA	NA	NA	NA			NA	NA	NA	NA
35716007	ATM	NM_000051.4	NM_000051.4:c.7307+1G>A	0.758	0	1	∆(E49q38); ∆(E49q38,E52); ∆(E49); ∆(E49,E52)	62.5%; 17.7%; 8.7%; 8.1%	-	-	-	-	complete	0.96	YES	Δ(E49q38) [FS]; flagged	lost site/s do not match native site	Δ(E49) [FS]	5+	5+	Top1:CD:-38:15%:Frameshift,Top2:CD:+49:0.04%:inFrame,Top3:CD:-34:0.03%:Frameshift,Top4:CD:+451:0.03%:inFrame	1
35716007	ATM	NM_000051.4	NM_000051.4:c.7307+4A>G	0.758	0	1	∆(E49q38); ∆(E49q38,E52)	86.5%; 13.5%	-	-	-	-	complete	0.63	YES	Δ(E49q38) [FS]; flagged	lost site/s do not match native site	Δ(E49) [FS]	6+	6+	Top1:CD:-38:15%:Frameshift,Top2:CD:+49:0.04%:inFrame,Top3:CD:-34:0.03%:Frameshift,Top4:CD:+451:0.03%:inFrame	1
35716007	ATM	NM_000051.4	NM_000051.4:c.7515G>A	0.758	0	1	∆(E50); ∆(E50,E52)	65.6%; 34.4%	-	-	-	-	complete	0.88	YES	Δ(E50q70) [FS]; flagged	lost site/s do not match native site	Δ(E50) [FS]	3+	5+	Top1:CD:+5:#430:Frameshift,Top2:ES:50:#57:Frameshift,Top3:CD:-70:#18:Frameshift,Top4:ES:49-50:#4:inFrame	1
35716007	ATM	NM_000051.4	NM_000051.4:c.7515+6T>C	0.758	0.484	0.361478	∆(E50); ∆(E50,E52)	34.3%; 17.3%	-	-	-	-	intermediate	0.54	YES	Δ(E50q70) [FS]; flagged	lost site/s do not match native site	Δ(E50) [FS]	3+	5+	Top1:CD:+5:#430:Frameshift,Top2:ES:50:#57:Frameshift,Top3:CD:-70:#18:Frameshift,Top4:ES:49-50:#4:inFrame	1
35716007	ATM	NM_000051.4	NM_000051.4:c.7629+2T>G	0.758	0	1	-	-	∆(E51)	1	-	-	complete	0.99	YES	Δ(E51) [IF]			6+	6+	Top1:CD:+232:0.02%:inFrame,Top2:CD:-12:0.004%:inFrame,Top3:CD:+5:0.003%:Frameshift,Top4:ES:50-51:0.002%:Frameshift	0
35716007	ATM	NM_000051.4	NM_000051.4:c.7630-3C>T	0.758	0.221	0.708443	-	-	∆(E52)	0.779	-	-	intermediate	0.38	YES	Δ(E52) [IF]			5+	5+	Top1:ES:52:15%:inFrame,Top2:ES:52-53:5%:Frameshift,Top3:CA:-15:4%:Frameshift,Top4:CA:+61:2%:Frameshift	1
35716007	ATM	NM_000051.4	NM_000051.4:c.7630-2A>C	0.758	0	1	∆(E52p11)	0.336	∆(E52)	0.664	-	-	complete	0.91	YES	Δ(E52p11) [FS]; Δ(E52) [IF]			6+	6+	Top1:ES:52:15%:inFrame,Top2:ES:52-53:5%:Frameshift,Top3:CA:-15:4%:Frameshift,Top4:CA:+61:2%:Frameshift	1
35716007	ATM	NM_000051.4	NM_000051.4:c.7787A>T	0.758	0	1	-	-	∆(E52)	1	-	-	complete	0.77	YES	Δ(E52) [IF]			6+	6+	Top1:ES:52:15%:inFrame,Top2:ES:52-53:5%:Frameshift,Top3:CD:+550:0.01%:inFrame,Top4:CD:-60:0.01%:inFrame	1
35716007	ATM	NM_000051.4	NM_000051.4:c.7788G>A	0.758	0	1	-	-	∆(E52)	1	-	-	complete	0.81	YES	Δ(E52) [IF]			6+	6+	Top1:ES:52:15%:inFrame,Top2:ES:52-53:5%:Frameshift,Top3:CD:+550:0.01%:inFrame,Top4:CD:-60:0.01%:inFrame	1
35716007	ATM	NM_000051.4	NM_000051.4:c.7788+1G>C	0.758	0	1	-	-	∆(E52)	1	-	-	complete	0.82	YES	Δ(E52) [IF]			6+	6+	Top1:ES:52:15%:inFrame,Top2:ES:52-53:5%:Frameshift,Top3:CD:+550:0.01%:inFrame,Top4:CD:-60:0.01%:inFrame	1
35716007	ATM	NM_000051.4	NM_000051.4:c.7788+6T>G	0.758	0.509	0.328496	-	-	∆(E52)	0.491	-	-	intermediate	0.12	NO	no aberrant transcript			1-	1-	-	-
37725924	CHEK2	NM_007194.4	WT (mgChk2_ex1-7)	0.733	0.733	0	[Δ(E4)▼(E4A38)]; Δ(E5)	13.2%; 4.0%	5'UTR: Δ(E1q13)	0.095	-	-	NA	NA	NA	NA			NA	NA	NA	NA
37725924	CHEK2	NM_007194.4	NM_007194.4:c.-7G>A	0.733	0.065	0.911323	[Δ(E1q13)Δ(E4)▼(E4A38)]; Δ(E1q13,E5)	7.6%; 2.2%	5'UTR: Δ(E1q13); 5'UTR: ▼(I1-mg)	75.7%; 8.0%	-	-	high	0.55	YES	Δ(E1q13) (does not affect coding region) [IF]			5+	5+	-	-
37725924	CHEK2	NM_007194.4	NM_007194.4:c.-7G>T	0.733	0.242	0.66985	[Δ(E1q13)Δ(E4)▼(E4A38)]	0.075	5'UTR: Δ(E1q13); 5'UTR: ▼(I1-mg)	60.2%; 8.1%	-	-	intermediate	0.54	YES	Δ(E1q13) (does not affect coding region) [IF]			5+	5+	-	-
37725924	CHEK2	NM_007194.4	NM_007194.4:c.-7+1G>T	0.733	0	1	[Δ(E1q13)Δ(E4)▼(E4A38)]; Δ(E1q13,E5)	11.2%; 3.0%	5'UTR: Δ(E1q13); 5'UTR: ▼(I1-mg)	81.2%; 3.6%	721-nt	0.01	complete	0.99	YES	Δ(E1q13) (does not affect coding region) [IF]; flagged	lost site/s do not match native site	no exon skipping or intron retention	6+	6+	-	-
37725924	CHEK2	NM_007194.4	NM_007194.4:c.-7+4_-7+13del	0.733	0	1	[Δ(E1q13)Δ(E4)▼(E4A38)]; Δ(E1q13,E5)	14.2%; 3.8%	5'UTR: Δ(E1q13); 5'UTR: ▼(I1-mg)	80.9%; 1.1%	-	-	complete	0.89	-	-			NA	NA	-	-
37725924	CHEK2	NM_007194.4	NM_007194.4:c.-6-6_-6-4del	0.733	0.925	-0.261937	-	-	5'UTR: Δ(E1q13); 5'UTR: ▼(I1-mg)	2.6%; 4.9%	-	-	no aberration	0.37	-	-			NA	NA	-	-
37725924	CHEK2	NM_007194.4	NM_007194.4:c.-6G>A	0.733	0.749	-0.0218281	[Δ(E4)▼(E4A38)]	0.104	5'UTR: ▼(I1-mg); 5'UTR: Δ(E1q13); OTHER: Δ(E2_E3)	7.1%; 5.0%; 2.6%	-	-	no aberration	0.09	NO	no aberrant transcript			3-	3-	-	-
37725924	CHEK2	NM_007194.4	NM_007194.4:c.-5T>G	0.733	0.493	0.327422	[Δ(E4)▼(E4A38)]	0.066	5'UTR: ▼(I1-mg); 5'UTR: Δ(E1q13); OTHER: Δ(E2_E3)	24.4%; 14.1%; 5.6%	-	-	intermediate	0.12	NO	no aberrant transcript			1-	1-	-	-
37725924	CHEK2	NM_007194.4	NM_007194.4:c.319G>A	0.733	0.26	0.645293	OTHER: Δ(E2); OTHER: [Δ(E2)Δ(E4)▼(E4A38)]; OTHER: Δ(E1q13,E2); OTHER: Δ(E2,E5)	53.0%; 9.2%; 4.7%; 4.0%	-	-	881-nt	0.031	intermediate	0.36	YES	Δ(E2) (start codon is lost) [FS]			5+	5+	-	-
37725924	CHEK2	NM_007194.4	NM_007194.4:c.319+2T>A	0.733	0	1	OTHER: Δ(E2); OTHER: [Δ(E2)Δ(E4)▼(E4A38)]; OTHER: Δ(E2,E5); OTHER: Δ(E1q13,E2)	73.9%; 9.3%; 9.3%; 6.1%	-	-	482-nt	0.014	complete	0.99	YES	Δ(E2) (start codon is lost) [FS]			5+	5+	Top1:ES:2:33%:Frameshift,Top2:ES:2-3:0.01%:inFrame,Top3:CD:+277:0.0006%:inFrame,Top4:CD:+16:0.0006%:inFrame	1
37725924	CHEK2	NM_007194.4	NM_007194.4:c.319+4del	0.733	0	1	OTHER: Δ(E2); OTHER: [Δ(E2)Δ(E4)▼(E4A38)]; OTHER: Δ(E2,E5); OTHER: Δ(E1q13,E2)	74.2%; 9.8%; 7.6%; 7.4%	-	-	482-nt	0.01	complete	0.8	-	-			NA	NA	Top1:ES:2:33%:Frameshift,Top2:ES:2-3:0.01%:inFrame,Top3:CD:+277:0.0006%:inFrame,Top4:CD:+16:0.0006%:inFrame	1
37725924	CHEK2	NM_007194.4	NM_007194.4:c.319+5G>T	0.733	0.228	0.68895	[Δ(E4)▼(E4A38)]; [Δ(E1q13)Δ(E4)▼(E4A38)] OTHER: Δ(E2); OTHER: Δ(E2,E5); OTHER: [Δ(E2)Δ(E4)▼(E4A38)]; OTHER: Δ(E1q13,E2)	2.7%; 1.4%; 37.4%; 9.8%; 5.0%; 4.6%	5'UTR: Δ(E1q13)	0.088	482-nt; 1446-nt; 881-nt	3.4%; 2.2%; 1.9%	intermediate	0.21	YES	Δ(E2) (start codon is lost) [FS]			5+	5+	-	-
37725924	CHEK2	NM_007194.4	NM_007194.4:c.320-3C>G	0.733	0	1	Δ(E3); ▼(E3p2); [Δ(E3_E4)▼(E4A38)]; Δ(E1q13,E3); [Δ(E1q13)▼(E3p2)]; Δ(E3,E5)	55.2%; 32.0%; 4.4%; 4.1%; 2.3%; 2.0%	-	-	-	-	complete	0.84	YES	▼(E3p2) [FS]; Δ(E3) [FS]			6+	6+	Top1:ES:3-4:3%:inFrame,Top2:CA:-29:0.03%:Frameshift,Top3:ES:3:0.02%:Frameshift,Top4:ES:2-3:0.01%:inFrame	1
37725924	CHEK2	NM_007194.4	NM_007194.4:c.320-2A>G	0.733	0	1	Δ(E3); Δ(E1q13,E3); [Δ(E3_E4)▼(E4A38)]; Δ(E3p28)	70.0%; 20.6%; 4.9%; 4.5%	-	-	-	-	complete	1	YES	▼(E3p28) [FS]; Δ(E3) [FS]			5+	5+	Top1:ES:3-4:3%:inFrame,Top2:CA:-29:0.03%:Frameshift,Top3:ES:3:0.02%:Frameshift,Top4:ES:2-3:0.01%:inFrame	1
37725924	CHEK2	NM_007194.4	NM_007194.4:c.444+1G>T	0.733	0	1	Δ(E3q1); Δ(E1q13,E3q1)	66.9%; 10.8%	[Δ(E3q1_E4)▼(E4A38)]; OTHER: Δ(E2_E3)	14.%; 8.3%	-	-	complete	1	YES	Δ(E3q1) [FS]			5+	5+	Top1:ES:3-4:2%:inFrame,Top2:CD:+5:0.3%:Frameshift,Top3:ES:3:0.01%:Frameshift,Top4:ES:2-3:0.01%:inFrame	0
37725924	CHEK2	NM_007194.4	NM_007194.4:c.444+1G>A	0.733	0	1	▼(E3q4); [Δ(E1q13)▼(E3q4)]	87.2%; 12.8%	-	-	-	-	complete	1	YES	▼(E3q4) [FS]			6+	6+	Top1:ES:3-4:2%:inFrame,Top2:CD:+5:0.3%:Frameshift,Top3:ES:3:0.01%:Frameshift,Top4:ES:2-3:0.01%:inFrame	1
37725924	CHEK2	NM_007194.4	NM_007194.4:c.444+3A>G	0.733	0.739	-0.00818554	[Δ(E4)▼(E4A38)]	0.137	5'UTR: Δ(E1q13)	0.124	-	-	no aberration	0.11	NO	no aberrant transcript			3-	3-	-	-
37725924	CHEK2	NM_007194.4	NM_007194.4:c.444+6T>C	0.733	0.733	0	[Δ(E4)▼(E4A38)]	0.155	5'UTR: Δ(E1q13)	0.112	-	-	no aberration	0.23	YES	▼(E3q35) [FS]			0+	0+	-	-
37725924	CHEK2	NM_007194.4	NM_007194.4:c.445-2A>G	0.733	0	1	[Δ(E4)▼(E4A38)]; [Δ(E1q13)Δ(E4)▼(E4A38)]; Δ(E4); Δ(E1q13,E4); Δ(E4_E5)	55.3%; 18.0%; 9.8%; 3.0%; 3.1%	-	-	952-nt	0.108	complete	0.99	YES	Δ(E4) [FS]			4+	4+	Top1:ES:4-5:15%:Frameshift,Top2:ES:4:4%:Frameshift,Top3:ES:3-4:2%:inFrame,Top4:CA:+4:2%:Frameshift	0
37725924	CHEK2	NM_007194.4	NM_007194.4:c.592+2T>G	0.733	0	1	[Δ(E4)▼(E4A38)]; Δ(E4); [Δ(E1q13)Δ(E4)▼(E4A38)]; Δ(E4_E5); Δ(E1q13,E4)	46.5%; 22.7%; 9.3%; 6.7%; 4.8%	-	-	952-nt	0.1	complete	0.99	YES	Δ(E4) [FS]			5+	5+	Top1:ES:4-5:17%:Frameshift,Top2:CD:+92:12%:Frameshift,Top3:CD:+413:11%:Frameshift,Top4:ES:4:5%:Frameshift	1
37725924	CHEK2	NM_007194.4	NM_007194.4:c.592+3A>T	0.733	0	1	[Δ(E4)▼(E4A38)]; Δ(E4); [Δ(E1q13)Δ(E4)▼(E4A38)]; Δ(E4_E5); Δ(E1q13,E4)	53.6%; 17.7%; 7.8%; 7.6%; 1.9%	-	-	952-nt	0.114	complete	0.9	YES	Δ(E4) [FS]			4+	4+	Top1:ES:4-5:17%:Frameshift,Top2:CD:+92:12%:Frameshift,Top3:CD:+413:11%:Frameshift,Top4:ES:4:5%:Frameshift	0
37725924	CHEK2	NM_007194.4	NM_007194.4:c.592+4A>G	0.733	0.353	0.518417	[Δ(E4)▼(E4A38)]; Δ(E4); Δ(E4_E5); [Δ(E1q13)Δ(E4)▼(E4A38)]; Δ(E1q13,E4)	30.1%; 10.2%; 5.6%; 4.8%; 1.3%	5'UTR: Δ(E1q13)	0.058	952-nt	0.069	intermediate	0.1	NO	no aberrant transcript			1-	1-	-	-
37725924	CHEK2	NM_007194.4	NM_007194.4:c.593-11_593-7del	0.733	0.123	0.832196	Δ(E5); Δ(E1q13,E5)	62.0%; 25.7%	-	-	-	-	high	0.63	-	-			NA	NA	-	-
37725924	CHEK2	NM_007194.4	NM_007194.4:c.683+3A>G	0.733	0.139	0.810368	Δ(E5); Δ(E1q13,E5)	57.3%; 23.7%	5'UTR: Δ(E1q13)	0.051	-	-	high	0.46	YES	Δ(E5) [FS]			5+	5+	Top1:ES:5:30%:Frameshift,Top2:ES:4-5:15%:Frameshift,Top3:CD:+431:0.002%:Frameshift,Top4:ES:5-6:0.001%:Frameshift	1
37725924	CHEK2	NM_007194.4	NM_007194.4:c.683+6T>C	0.733	0.67	0.0859482	[Δ(E4)▼(E4A38)]	0.073	5'UTR: Δ(E1q13)	0.257	-	-	low	0.07	NO	no aberrant transcript			2-	2-	-	-
37725924	CHEK2	NM_007194.4	NM_007194.4:c.684-2A>G	0.733	0	1	▼(E6p1); Δ(E6p14); [Δ(E4)▼(E4A38)▼(E6p1)]; [Δ(E4)▼(E4A38)Δ(E6p14)]; Δ(E6p22); Δ(E1q13,E6p14)	40.4%; 33.9%; 9.2%; 6.5%; 5.2%; 4.8%	-	-	-	-	complete	1	YES	Δ(E6p14) [FS]; Δ(E6) [FS]			5+	5+	Top1:ES:6-7:0.03%:Frameshift,Top2:CA:-509:0.03%:Frameshift,Top3:CA:-30:0.02%:Frameshift,Top4:CA:-278:0.02%:Frameshift	0
37725924	CHEK2	NM_007194.4	NM_007194.4:c.784_792+5del	0.733	0	1	[Δ(E6q9)▼(E6q114)]; [Δ(E1q13)Δ(E6q9)▼(E6q114)]; [Δ(E4)▼(E4A38)Δ(E6q9)▼(E6q114)]; Δ(E6q65)	76.1%; 10.5%; 9.3%; 4.1%	-	-	-	-	complete	1	-	-			NA	NA	-	-
37725924	CHEK2	NM_007194.4	NM_007194.4:c.792+1G>A	0.733	0	1	▼(E6q119); Δ(E6q65); [Δ(E4)▼(E4A38)▼(E6q119)]; [Δ(E1q13)▼(E6q119)]; [Δ(E4)▼(E4A38)Δ(E6q65)]	58.7%; 24.4%; 7.7%; 3.4%; 3.2%	-	-	957-nt	0.026	complete	1	YES	▼(E6q119) [FS]; Δ(E6) [FS]			5+	5+	Top1:CD:+120:1%:Frameshift,Top2:ES:6-7:0.04%:Frameshift,Top3:CD:+566:0.02%:Frameshift,Top4:CD:-65:0.01%:Frameshift	1
37725924	CHEK2	NM_007194.4	WT (mgChk2_ex6-10)	0.895	0.895	0	Δ(E8)	0.03	Δ(E10)	0.075	-	-	NA	NA	NA	NA			NA	NA	NA	NA
37725924	CHEK2	NM_007194.4	NM_007194.4:c.793-2A>G	0.895	0	1	▼(E7p1); [▼(E7p1)Δ(E10)]; [▼(E7p1)Δ(E8)]	83.0%; 14.2%; 2.8%	-	-	-	-	complete	0.99	YES	▼(E7p1) [FS]			6+	6+	Top1:ES:7-8:1%:Frameshift,Top2:ES:7:0.3%:inFrame,Top3:ES:6-7:0.04%:Frameshift,Top4:CA:+7:0.02%:Frameshift	0
37725924	CHEK2	NM_007194.4	NM_007194.4:c.793-1G>T	0.895	0	1	Δ(E7p7); Δ(E7_E8)	11.3%; 3.7%	Δ(E7); Δ(E7,E10)	74.6%; 10.4%	-	-	complete	0.99	YES	Δ(E7p7) [FS]; Δ(E7) [IF]			6+	6+	Top1:ES:7-8:1%:Frameshift,Top2:ES:7:0.3%:inFrame,Top3:ES:6-7:0.04%:Frameshift,Top4:CA:+7:0.02%:Frameshift	1
37725924	CHEK2	NM_007194.4	NM_007194.4:c.793-1G>A	0.895	0	1	Δ(E7p1); Δ(E7p1,E10); Δ(E7_E8)	63.7%; 5.5%; 2.4%	Δ(E7); Δ(E7,E10)	23.3%; 5.1%	-	-	complete	0.99	YES	Δ(E7p1) [FS]; Δ(E7) [IF]			6+	6+	Top1:ES:7-8:1%:Frameshift,Top2:ES:7:0.3%:inFrame,Top3:ES:6-7:0.04%:Frameshift,Top4:CA:+7:0.02%:Frameshift	1
37725924	CHEK2	NM_007194.4	NM_007194.4:c.846+1G>T	0.895	0	1	Δ(E7_E8)	0.05	Δ(E7); Δ(E7,E10)	84.2%; 10.8%	-	-	complete	0.99	YES	Δ(E7) [IF]			6+	6+	Top1:ES:7-8:2%:Frameshift,Top2:ES:7:0.4%:inFrame,Top3:ES:6-7:0.04%:Frameshift	1
37725924	CHEK2	NM_007194.4	NM_007194.4:c.846+5G>A	0.895	0	1	Δ(E7_E8)	0.044	Δ(E7); Δ(E7,E10)	84.3%; 11.3%	-	-	complete	0.98	YES	Δ(E7) [IF]			6+	6+	Top1:ES:7-8:2%:Frameshift,Top2:ES:7:0.4%:inFrame,Top3:ES:6-7:0.04%:Frameshift	1
37725924	CHEK2	NM_007194.4	NM_007194.4:c.846+6T>C	0.895	0.082	0.90838	Δ(E7_E8)	0.044	Δ(E7); Δ(E7,E10)	77.5%; 9.9%	-	-	high	0.6	YES	Δ(E7) [IF]			5+	5+	Top1:ES:7-8:2%:Frameshift,Top2:ES:7:0.4%:inFrame,Top3:ES:6-7:0.04%:Frameshift	1
37725924	CHEK2	NM_007194.4	NM_007194.4:c.846+4_846+7del	0.895	0	1	Δ(E7_E8)	0.058	Δ(E7); Δ(E7,E10)	80.3%; 13.9%	-	-	complete	0.99	-	-			NA	NA	Top1:ES:7-8:2%:Frameshift,Top2:ES:7:0.4%:inFrame,Top3:ES:6-7:0.04%:Frameshift	1
37725924	CHEK2	NM_007194.4	NM_007194.4:c.847-14_847-2delinsGG	0.895	0	1	Δ(E8); Δ(E8,E10)	81.4%; 18.6%	-	-	-	-	complete	0.88	-	-			NA	NA	-	-
37725924	CHEK2	NM_007194.4	NM_007194.4:c.908+1G>T	0.895	0	1	Δ(E8); Δ(E8,E10)	81.4%; 18.6%	-	-	-	-	complete	0.88	YES	Δ(E8) [FS]			6+	6+	Top1:ES:8:61%:Frameshift,Top2:ES:7-8:1%:Frameshift,Top3:ES:8-9:1%:inFrame,Top4:CD:+271:0.002%:inFrame	1
37725924	CHEK2	NM_007194.4	NM_007194.4:c.908+3A>T	0.895	0	1	Δ(E8); Δ(E8,E10)	83.3%; 16.7%	-	-	-	-	complete	0.88	YES	Δ(E8) [FS]			6+	6+	Top1:ES:8:61%:Frameshift,Top2:ES:7-8:1%:Frameshift,Top3:ES:8-9:1%:inFrame,Top4:CD:+271:0.002%:inFrame	1
37725924	CHEK2	NM_007194.4	NM_007194.4:c.1008+4A>G	0.895	0.928	-0.0368715	-	-	Δ(E10)	0.072	-	-	no aberration	0.03	NO	no aberrant transcript			3-	3-	-	-
37725924	CHEK2	NM_007194.4	NM_007194.4:c.1009-5T>A	0.895	0.018	0.979888	Δ(E8,E10)	0.019	Δ(E10)	0.963	-	-	high	0.76	YES	▼(E10p142) [FS]; Δ(E10) [IF]			6+	6+	Top1:ES:10:43%:inFrame,Top2:CA:-143:18%:Frameshift,Top3:ES:10-11:3%:Frameshift,Top4:CA:-46:0.2%:inFrame	1
37725924	CHEK2	NM_007194.4	NM_007194.4:c.1095G>C	0.895	0.058	0.935196	Δ(E8,E10)	0.027	Δ(E10)	0.915	-	-	high	0.3	YES	Δ(E10) [IF]			6+	6+	Top1:ES:10:42%:inFrame,Top2:ES:10-11:2%:Frameshift,Top3:ES:9-10:0.06%:Frameshift,Top4:CD:+517:0.04%:inFrame	1
37725924	CHEK2	NM_007194.4	NM_007194.4:c.1095+1G>A	0.895	0	1	Δ(E8,E10)	0.048	Δ(E10)	0.952	-	-	complete	0.97	YES	Δ(E10) [IF]			6+	6+	Top1:ES:10:42%:inFrame,Top2:ES:10-11:2%:Frameshift,Top3:ES:9-10:0.06%:Frameshift,Top4:CD:+517:0.04%:inFrame	1
37725924	CHEK2	NM_007194.4	WT (mgChk2_ex11-15)	0.859	0.859	0	-	-	Δ(E12p33)	0.141	-	-	NA	NA	NA	NA			NA	NA	NA	NA
37725924	CHEK2	NM_007194.4	NM_007194.4:c.1096-6T>G	0.859	0	1	▼(E11p5); [▼(E11p5)Δ(E12p33)]	89.8%; 10.2%	-	-	-	-	complete	0.54	YES	▼(E11p5) [FS]; Δ(E11) [FS]			6+	6+	Top1:ES:11:5%:Frameshift,Top2:ES:10-11:2%:Frameshift,Top3:CA:+24:0.1%:inFrame,Top4:CA:-34:0.01%:inFrame	0
37725924	CHEK2	NM_007194.4	NM_007194.4:c.1259+5G>C	0.859	0.683	0.204889	Δ(E11); Δ(E11_E12p33)	21.1%; 2.1%	Δ(E12p33)	0.085	-	-	intermediate	0.66	YES	Δ(E11) [FS]			5+	5+	Top1:ES:11:5%:Frameshift,Top2:ES:10-11:2%:Frameshift,Top3:ES:11-12:0.01%:Frameshift,Top4:CD:-25:0.002%:Frameshift	1
37725924	CHEK2	NM_007194.4	NM_007194.4:c.1260-8A>G	0.859	0	1	▼(E12p7)	0.99	Δ(E12p33)	0.01	-	-	complete	0.99	YES	▼(E12p7) [FS]; flagged	lost site/s do not match native site	no exon skipping or intron retention	6+	6+	Top1:CA:+33:26%:inFrame,Top2:CA:+6:5%:inFrame,Top3:CA:+28:0.7%:Frameshift,Top4:ES:12:0.09%:Frameshift	0
37725924	CHEK2	NM_007194.4	NM_007194.4:c.1375G>A	0.859	0	1	Δ(E12); Δ(E12_E13)	98.9%; 1.1%	-	-	-	-	complete	0.54	YES, flagged	flagged	lost site/s do not match native site	Δ(E12) [FS]	3+	6+	Top1:ES:12:0.09%:Frameshift,Top2:ES:12-13:0.08%:Frameshift,Top3:CD:-25:0.05%:Frameshift,Top4:CD:+211:0.05%:inFrame	1
37725924	CHEK2	NM_007194.4	NM_007194.4:c.1375+1_1375+2del	0.859	0	1	Δ(E12)	1	-	-	-	-	complete	0.99	-	-			NA	NA	Top1:ES:12:0.09%:Frameshift,Top2:ES:12-13:0.08%:Frameshift,Top3:CD:-25:0.05%:Frameshift,Top4:CD:+211:0.05%:inFrame	1
37725924	CHEK2	NM_007194.4	NM_007194.4:c.1376-1G>C	0.859	0	1	Δ(E13); Δ(E13p17); Δ(E13p20); Δ(E12p33,E13); Δ(E12p33,E13p17); Δ(E12p33,E13p20); Δ(E12_E13)	51.4%; 22.2%; 11.2%; 7.9%; 3.9%; 1.9%; 1.5%	-	-	-	-	complete	0.94	YES	Δ(E13p17) [FS]; Δ(E13) [FS]			5+	5+	Top1:ES:13:2%:Frameshift,Top2:ES:12-13:0.08%:Frameshift,Top3:CA:+17:0.01%:Frameshift,Top4:CA:+20:0.01%:Frameshift	1
37725924	CHEK2	NM_007194.4	NM_007194.4:c.1459C>T	0.859	0.734	0.145518	Δ(E13); Δ(E12p33,E13); Δ(E12_E13)	12.5%; 1.8%; 1.5%	Δ(E12p33)	0.108	-	-	low	0.11	NO	no aberrant transcript			2-	2-	-	-
37725924	CHEK2	NM_007194.4	NM_007194.4:c.1461+5G>T	0.859	0	1	Δ(E13); Δ(E12p33,E13); Δ(E12_E13)	85.8%; 12.8%; 1.4%	-	-	-	-	complete	0.9	YES	Δ(E13) [FS]			6+	6+	Top1:ES:13:2%:Frameshift,Top2:CD:+299:0.3%:Frameshift,Top3:ES:12-13:0.08%:Frameshift,Top4:CD:+93:0.009%:Frameshift	1
37725924	CHEK2	NM_007194.4	NM_007194.4:c.1542G>T	0.859	0	1	-	-	Δ(E14q12); Δ(E12p33,E14q12)	83.9%; 15.1%	632-nt	0.01	complete	0.84	YES	Δ(E14q12) [IF]; Δ(E14) [IF]			6+	6+	Top1:CD:-12:1%:inFrame,Top2:CD:+7:0.2%:inFrame,Top3:ES:14:0.01%:inFrame,Top4:CD:+315:0.01%:Frameshift	1
37725924	CHEK2	NM_007194.4	NM_007194.4:c.1542+3A>G	0.859	0	1	▼(E14q2); [Δ(E12p33)▼(E14q2)]	70.4%; 10.7%	Δ(E14q12); Δ(E12p33,E14q12)	16.9%; 2.0%	-	-	complete	0.46	YES	Δ(E14q12) [IF]			4+	4+	-	-
37725924	CHEK2	NM_007194.4	NM_007194.4:c.1543-9_1546del	0.859	0	1	Δ(E15p11); Δ(E12p33,E15p11)	84.9%; 15.1%	-	-	-	-	complete	0.98	-	-			NA	NA	-	-
30883759	BRCA2	NM_000059.4	WT (mgBR2_2-9)	0.919	0.919	0	Δ(E5); Δ(E5_E6); Δ(E6q39_E7)	3.2%; 0.6%; 3.4%	Δ(E3)	0.008	-	-	NA	NA	NA	NA			NA	NA	NA	NA
30883759	BRCA2	NM_000059.4	NM_000059.4:c.48dup	0.919	0.962	-0.04679	Δ(E5)	0.025	Δ(E3)	0.013	-	-	no aberration	0.02	-	-			NA	NA	-	-
30883759	BRCA2	NM_000059.4	NM_000059.4:c.62A>G	0.919	0.939	-0.0217628	Δ(E6q39_E7)	0.027	-	-	857-nt	0.034	no aberration	0.02	NO	no aberrant transcript			3-	3-	-	-
30883759	BRCA2	NM_000059.4	NM_000059.4:c.67G>A	0.919	0.077	0.916213	Δ(E2q4)	0.89	-	-	963-nt	0.033	high	0.59	YES	Δ(E2) (start codon is lost) [FS]; Δ(E2q4) [FS]			6+	6+	Top1:ES:2:0.7%:Frameshift,Top2:ES:2-3:0.2%:Frameshift,Top3:CD:-4:0.05%:Frameshift,Top4:CD:-73:0.02%:Frameshift	1
30883759	BRCA2	NM_000059.4	NM_000059.4:c.67+1G>T	0.919	0	1	Δ(E2)	1	-	-	-	-	complete	0.98	YES	Δ(E2) (start codon is lost) [FS]			6+	6+	Top1:ES:2:0.7%:Frameshift,Top2:ES:2-3:0.2%:Frameshift,Top3:CD:-4:0.05%:Frameshift,Top4:CD:-73:0.02%:Frameshift	1
30883759	BRCA2	NM_000059.4	NM_000059.4:c.67+2T>C	0.919	0	1	Δ(E2); Δ(E3_E4)	83.7%; 8.7%	-	-	609-nt; 757-nt; 860-nt	0.9%; 2.0%; 4.7%	complete	0.94	YES	Δ(E2) (start codon is lost) [FS]			6+	6+	Top1:ES:2:0.7%:Frameshift,Top2:ES:2-3:0.2%:Frameshift,Top3:CD:-4:0.05%:Frameshift,Top4:CD:-73:0.02%:Frameshift	1
30883759	BRCA2	NM_000059.4	NM_000059.4:c.67+3A>G	0.919	0.024	0.973885	Δ(E2); Δ(E3_E4)	77.6%; 10.5%	-	-	609-nt; 757-nt; 860-nt	1.1%; 2.4%; 6.0%	high	0.58	YES	Δ(E2) (start codon is lost) [FS]			5+	5+	Top1:ES:2:0.7%:Frameshift,Top2:ES:2-3:0.2%:Frameshift,Top3:CD:-4:0.05%:Frameshift,Top4:CD:-73:0.02%:Frameshift	1
30883759	BRCA2	NM_000059.4	NM_000059.4:c.68-7T>A	0.919	0.9	0.0206746	Δ(E6q39_E7)	0.072	Δ(E3)	0.028	-	-	low	0.07	NO	no aberrant transcript			2-	2-	-	-
30883759	BRCA2	NM_000059.4	NM_000059.4:c.71T>A	0.919	0.972	-0.0576714	Δ(E6q39_E7)	0.028	-	-	-	-	no aberration	0.01	NO	no aberrant transcript			3-	3-	-	-
30883759	BRCA2	NM_000059.4	NM_000059.4:c.79A>G	0.919	0.973	-0.0587595	Δ(E6q39_E7)	0.027	-	-	-	-	no aberration	0.01	NO	no aberrant transcript			3-	3-	-	-
30883759	BRCA2	NM_000059.4	NM_000059.4:c.92G>A	0.919	0.52	0.434168	Δ(E5); Δ(E5_E6)	3.3%; 1.5%	Δ(E3)	0.355	715-nt; 675-nt	4.8%; 2.8%	intermediate	0.22	YES	Δ(E3) [IF]			5+	5+	Top1:ES:3:16%:inFrame,Top2:ES:3-4:2%:Frameshift,Top3:ES:2-3:0.2%:Frameshift,Top4:CA:+6:0.09%:inFrame	1
30883759	BRCA2	NM_000059.4	NM_000059.4:c.92G>C	0.919	0.946	-0.0293798	Δ(E5); Δ(E6q39_E7)	1.7%; 2.2%	-	-	-	-	no aberration	0.01	NO	no aberrant transcript			3-	3-	-	-
30883759	BRCA2	NM_000059.4	NM_000059.4:c.97G>A	0.919	0.233	0.746464	Δ(E6q39_E7)	0.014	Δ(E3)	0.711	715-nt	0.042	intermediate	0.14	NO	no aberrant transcript			1-	1-	-	-
30883759	BRCA2	NM_000059.4	NM_000059.4:c.100G>A	0.919	0.337	0.633297	-	-	Δ(E3)	0.57	973-nt; 715-nt	5.1%; 4.2%	intermediate	0.44	YES	Δ(E3) [IF]			5+	5+	-	-
30883759	BRCA2	NM_000059.4	NM_000059.4:c.121C>T	0.919	0.945	-0.0282916	Δ(E5)	0.055	-	-	-	-	no aberration	0	NO	no aberrant transcript			3-	3-	-	-
30883759	BRCA2	NM_000059.4	NM_000059.4:c.140C>T	0.919	0.827	0.100109	Δ(E5)	0.039	Δ(E3)	0.134	-	-	low	0.02	NO	no aberrant transcript			2-	2-	-	-
30883759	BRCA2	NM_000059.4	NM_000059.4:c.143A>G	0.919	0.703	0.235038	-	-	Δ(E3)	0.269	715-nt	0.029	intermediate	0.13	NO	no aberrant transcript			1-	1-	-	-
30883759	BRCA2	NM_000059.4	NM_000059.4:c.144del	0.919	0.787	0.143634	Δ(E5); Δ(E6q39_E7)	3.4%; 2.1%	Δ(E3)	0.158	-	-	low	0.26	-	-			NA	NA	-	-
30883759	BRCA2	NM_000059.4	NM_000059.4:c.215A>G	0.919	0.79	0.14037	Δ(E5); Δ(E6q39_E7)	6.6%; 1.8%	Δ(E3)	0.083	927-nt; 715-nt	2.6%; 1.8%	low	0.04	NO	no aberrant transcript			2-	2-	-	-
30883759	BRCA2	NM_000059.4	NM_000059.4:c.217C>T	0.919	0.789	0.141458	-	-	Δ(E3)	0.211	-	-	low	0.17	NO	no aberrant transcript			2-	2-	-	-
30883759	BRCA2	NM_000059.4	NM_000059.4:c.222G>A	0.919	0.623	0.322089	Δ(E5); Δ(E6q39_E7)	2.1%; 1.7%	Δ(E3)	0.315	715-nt	0.024	intermediate	0.05	NO	no aberrant transcript			1-	1-	-	-
30883759	BRCA2	NM_000059.4	NM_000059.4:c.244A>T	0.919	0.913	0.00652884	Δ(E5); Δ(E6q39_E7)	2.4%; 2.4%	Δ(E3)	0.039	-	-	low	0.12	NO	no aberrant transcript			2-	2-	-	-
30883759	BRCA2	NM_000059.4	NM_000059.4:c.250C>T	0.919	0.965	-0.0500544	Δ(E6q39_E7)	0.035	-	-	-	-	no aberration	0.23	YES	Δ(E3) [IF]			0+	0+	-	-
30883759	BRCA2	NM_000059.4	NM_000059.4:c.316+2T>C	0.919	0	1	-	-	Δ(E3)	0.962	715-nt	0.038	complete	0.95	YES	Δ(E3) [IF]			6+	6+	Top1:ES:3:15%:inFrame,Top2:ES:3-4:1%:Frameshift,Top3:ES:2-3:0.2%:Frameshift,Top4:CD:+402:0.005%:Frameshift	1
30883759	BRCA2	NM_000059.4	NM_000059.4:c.316+3del	0.919	0	1	-	-	Δ(E3)	0.886	715-nt; 675-nt	7.0%; 2.3%	complete	0.96	-	-			NA	NA	Top1:ES:3:15%:inFrame,Top2:ES:3-4:1%:Frameshift,Top3:ES:2-3:0.2%:Frameshift,Top4:CD:+402:0.005%:Frameshift	1
30883759	BRCA2	NM_000059.4	NM_000059.4:c.316+5G>C	0.919	0	1	-	-	Δ(E3)	0.903	715-nt; 675-nt	7.3%; 2.4%	complete	0.92	YES	Δ(E3) [IF]			6+	6+	Top1:ES:3:15%:inFrame,Top2:ES:3-4:1%:Frameshift,Top3:ES:2-3:0.2%:Frameshift,Top4:CD:+402:0.005%:Frameshift	1
30883759	BRCA2	NM_000059.4	NM_000059.4:c.316+6T>C	0.919	0.219	0.761697	-	-	Δ(E3)	0.687	715-nt; 675-nt	7.0%; 2.4%	intermediate	0.2	YES	Δ(E3) [IF]			5+	5+	-	-
30883759	BRCA2	NM_000059.4	NM_000059.4:c.317-2A>G	0.919	0	1	Δ(E4); Δ(E4_E6)	62.9%; 13.3%	Δ(E4_E5)	0.238	-	-	complete	0.98	YES	Δ(E4) [FS]			5+	5+	Top1:CA:+4:8%:Frameshift,Top2:ES:3-4:1%:Frameshift,Top3:ES:4:0.7%:Frameshift,Top4:ES:4-5:0.2%:inFrame	1
30883759	BRCA2	NM_000059.4	NM_000059.4:c.352C>T	0.919	0.737	0.198041	Δ(E4); Δ(E4_E6)	11.6%; 8.4%	Δ(E4_E5)	0.063	-	-	low	0.15	NO	no aberrant transcript			2-	2-	-	-
30883759	BRCA2	NM_000059.4	NM_000059.4:c.356C>G	0.919	0.879	0.0435256	Δ(E5); Δ(E5_E6); Δ(E6q39_E7)	6.5%; 2.9%; 2.7%	-	-	-	-	low	0.02	NO	no aberrant transcript			2-	2-	-	-
30883759	BRCA2	NM_000059.4	NM_000059.4:c.368_372del	0.919	0.706	0.231774	Δ(E4); Δ(E4_E6)	13.7%; 8.9%	Δ(E4_E5)	0.068	-	-	intermediate	0.07	-	-			NA	NA	-	-
30883759	BRCA2	NM_000059.4	NM_000059.4:c.375T>A	0.919	0.931	-0.0130577	Δ(E5)	0.069	-	-	-	-	no aberration	0	NO	no aberrant transcript			3-	3-	-	-
30883759	BRCA2	NM_000059.4	NM_000059.4:c.378A>G	0.919	0.54	0.412405	Δ(E4); Δ(E4_E6)	25.6%; 9.4%	Δ(E4_E5)	0.109	-	-	intermediate	0.1	NO	no aberrant transcript			1-	1-	-	-
30883759	BRCA2	NM_000059.4	NM_000059.4:c.379G>T	0.919	0.841	0.0848749	Δ(E4); Δ(E4_E6); Δ(E5); Δ(E5_E6)	4.0%; 4.3%; 5.8%; 1.9%	-	-	-	-	low	0.03	NO	no aberrant transcript			2-	2-	-	-
30883759	BRCA2	NM_000059.4	NM_000059.4:c.383A>G	0.919	0.783	0.147987	Δ(E4); Δ(E4q43); Δ(E4_E6); Δ(E5)	3.6%; 12.1%; 3.9%; 2.1%	-	-	-	-	low	0.39	YES	Δ(E4) [FS]			2+	2+	-	-
30883759	BRCA2	NM_000059.4	NM_000059.4:c.394_398del	0.919	0.92	-0.00108814	Δ(E5); Δ(E6q39_E7)	3.3%; 3.1%	-	-	817-nt	0.016	no aberration	0.03	-	-			NA	NA	-	-
30883759	BRCA2	NM_000059.4	NM_000059.4:c.407del	0.919	0.878	0.0446137	Δ(E5)	0.08	Δ(E3)	0.015	927-nt	0.027	low	0.03	-	-			NA	NA	-	-
30883759	BRCA2	NM_000059.4	NM_000059.4:c.426-12_426-8del	0.919	0.247	0.73123	Δ(E5); Δ(E5_E6)	72.7%; 1.9%	-	-	806-nt	0.008	intermediate	0.38	-	-			NA	NA	-	-
30883759	BRCA2	NM_000059.4	NM_000059.4:c.426-2A>T	0.919	0	1	Δ(E5)	1	-	-	-	-	complete	0.98	YES	Δ(E5) [FS]			6+	6+	Top1:ES:5:5%:Frameshift,Top2:ES:5-6:0.6%:Frameshift,Top3:CA:-536:0.4%:Frameshift,Top4:ES:4-5:0.2%:inFrame	1
30883759	BRCA2	NM_000059.4	NM_000059.4:c.438A>G	0.919	0.95	-0.0337323	Δ(E4); Δ(E6q39_E7)	1.8%; 3.2%	-	-	-	-	no aberration	0	NO	no aberrant transcript			3-	3-	-	-
30883759	BRCA2	NM_000059.4	NM_000059.4:c.440A>G	0.919	0.937	-0.0195865	Δ(E6q39_E7)	0.046	Δ(E3)	0.017	-	-	no aberration	0.02	NO	no aberrant transcript			3-	3-	-	-
30883759	BRCA2	NM_000059.4	NM_000059.4:c.440A>T	0.919	0.801	0.129489	Δ(E5); Δ(E6q39_E7)	15.7%; 2.5%	-	-	817-nt	0.017	low	0.02	NO	no aberrant transcript			2-	2-	-	-
30883759	BRCA2	NM_000059.4	NM_000059.4:c.441A>G	0.919	0	1	Δ(E5); Δ(E5_E6)	96%; 4%	-	-	-	-	complete	0.04	NO	no aberrant transcript			0-	0-	-	-
30883759	BRCA2	NM_000059.4	NM_000059.4:c.447A>G	0.919	0.929	-0.0108814	Δ(E6q39_E7)	0.043	Δ(E3)	0.028	-	-	no aberration	0.01	NO	no aberrant transcript			3-	3-	-	-
30883759	BRCA2	NM_000059.4	NM_000059.4:c.451G>A	0.919	0	1	Δ(E5); Δ(E5_E6)	89.2%; 9.6%	Δ(E7_E8)	0.013	-	-	complete	0.01	NO	no aberrant transcript			0-	0-	-	-
30883759	BRCA2	NM_000059.4	NM_000059.4:c.467A>G	0.919	0	1	-	-	Δ(E5q9); Δ(E4_E5)	96.6%; 1.5%	930-nt	0.019	complete	0.97	YES	Δ(E5q9) [IF]			6+	6+	-	-
30883759	BRCA2	NM_000059.4	NM_000059.4:c.470_474del	0.919	0.167	0.818281	Δ(E5)	0.832	-	-	-	-	high	0.38	-	-			NA	NA	-	-
30883759	BRCA2	NM_000059.4	NM_000059.4:c.475+1G>T	0.919	0	1	Δ(E5)	1	-	-	-	-	complete	0.98	YES	Δ(E5) [FS]			6+	6+	Top1:ES:5:5%:Frameshift,Top2:ES:5-6:0.6%:Frameshift,Top3:ES:4-5:0.2%:inFrame,Top4:CD:-5:0.01%:Frameshift	1
30883759	BRCA2	NM_000059.4	NM_000059.4:c.475+3A>T	0.919	0	1	Δ(E5); Δ(E5_E6)	96.8%; 3.2%	-	-	-	-	complete	0.82	YES	Δ(E5) [FS]			6+	6+	Top1:ES:5:5%:Frameshift,Top2:ES:5-6:0.6%:Frameshift,Top3:ES:4-5:0.2%:inFrame,Top4:CD:-5:0.01%:Frameshift	1
30883759	BRCA2	NM_000059.4	NM_000059.4:c.476-3C>A	0.919	0.298	0.675734	Δ(E5_E6); Δ(E6)	55.3%; 15%	-	-	-	-	intermediate	0.31	YES	Δ(E6) [FS]			4+	4+	Top1:ES:5-6:0.6%:Frameshift,Top2:ES:6-7:0.2%:inFrame,Top3:ES:6:0.1%:Frameshift,Top4:CA:-52:0.0009%:inFrame	1
30883759	BRCA2	NM_000059.4	NM_000059.4:c.476-2A>G	0.919	0	1	Δ(E5_E6); Δ(E6)	27.3%; 72.7%	-	-	-	-	complete	0.98	YES	Δ(E6) [FS]; Δ(E6p32) [FS]			5+	5+	Top1:ES:5-6:0.6%:Frameshift,Top2:ES:6-7:0.2%:inFrame,Top3:ES:6:0.1%:Frameshift,Top4:CA:-52:0.0009%:inFrame	1
30883759	BRCA2	NM_000059.4	NM_000059.4:c.478G>A	0.919	1	-0.0881393	-	-	-	-	-	-	no aberration	0.01	NO	no aberrant transcript			3-	3-	-	-
30883759	BRCA2	NM_000059.4	NM_000059.4:c.506A>G	0.919	0.941	-0.0239391	Δ(E5); Δ(E6q39_E7)	1.9%; 3.0%	Δ(E3)	0.01	-	-	no aberration	0.12	NO	no aberrant transcript			3-	3-	-	-
30883759	BRCA2	NM_000059.4	NM_000059.4:c.508T>G	0.919	0.957	-0.0413493	Δ(E5); Δ(E6q39_E7)	1.7%; 2.6%	-	-	-	-	no aberration	0.02	NO	no aberrant transcript			3-	3-	-	-
30883759	BRCA2	NM_000059.4	NM_000059.4:c.516+1G>T	0.919	0	1	Δ(E5_E6); Δ(E6)	14.8%; 85.2%	-	-	-	-	complete	0.98	YES	Δ(E6) [FS]			6+	6+	Top1:ES:5-6:0.6%:Frameshift,Top2:ES:6-7:0.2%:inFrame,Top3:ES:6:0.1%:Frameshift	1
30883759	BRCA2	NM_000059.4	NM_000059.4:c.516+2T>C	0.919	0	1	Δ(E5_E6); Δ(E6)	47.7%; 52.3%	-	-	-	-	complete	0.97	YES	Δ(E6) [FS]			5+	5+	Top1:ES:5-6:0.6%:Frameshift,Top2:ES:6-7:0.2%:inFrame,Top3:ES:6:0.1%:Frameshift	1
30883759	BRCA2	NM_000059.4	NM_000059.4:c.516+4_516+5del	0.919	0.064	0.930359	Δ(E5_E6); Δ(E6)	52.7%; 40.9%	-	-	-	-	high	0.47	-	-			NA	NA	Top1:ES:5-6:0.6%:Frameshift,Top2:ES:6-7:0.2%:inFrame,Top3:ES:6:0.1%:Frameshift	1
30883759	BRCA2	NM_000059.4	NM_000059.4:c.517-2A>G	0.919	0	1	Δ(E7)	0.938	Δ(E7_E8)	0.038	651-nt	0.024	complete	0.81	YES	Δ(E7) [FS]			6+	6+	Top1:ES:7:1%:Frameshift,Top2:ES:6-7:0.2%:inFrame,Top3:CA:+9:0.08%:inFrame,Top4:CA:+37:0.007%:Frameshift	1
30883759	BRCA2	NM_000059.4	NM_000059.4:c.517-1G>A	0.919	0	1	Δ(E5); Δ(E7p1); Δ(E7)	2.1%; 84.6%; 11.1%	-	-	856-nt	0.022	complete	0.78	YES	Δ(E7) [FS]; Δ(E7p1) [FS]			6+	6+	Top1:ES:7:1%:Frameshift,Top2:ES:6-7:0.2%:inFrame,Top3:CA:+9:0.08%:inFrame,Top4:CA:+37:0.007%:Frameshift	0
30883759	BRCA2	NM_000059.4	NM_000059.4:c.517G>T	0.919	0	1	Δ(E7)	0.908	Δ(E7_E8)	0.064	651-nt	0.028	complete	0.4	YES	Δ(E7) [FS]			6+	6+	Top1:ES:7:1%:Frameshift,Top2:ES:6-7:0.2%:inFrame,Top3:CA:+9:0.08%:inFrame,Top4:CA:+37:0.007%:Frameshift	1
30883759	BRCA2	NM_000059.4	NM_000059.4:c.572A>G	0.919	0.149	0.837867	Δ(E6q39_E7); Δ(E7q60)	1.4%; 83.6%	-	-	-	-	high	0.87	YES	Δ(E7q60) [FS]			6+	6+	-	-
30883759	BRCA2	NM_000059.4	NM_000059.4:c.599C>T	0.919	0.904	0.0163221	-	-	-	-	872-nt; 834-nt	6.1%; 3.5%	low	0.17	NO	no aberrant transcript			2-	2-	-	-
30883759	BRCA2	NM_000059.4	NM_000059.4:c.606C>T	0.919	0.9	0.0206746	Δ(E5); Δ(E6q39_E7)	5.7%; 3.1%	Δ(E3)	0.013	-	-	low	0.01	NO	no aberrant transcript			2-	2-	-	-
30883759	BRCA2	NM_000059.4	NM_000059.4:c.617C>G	0.919	0.724	0.212187	Δ(E6q39_E7); Δ(E7)	4.5%; 23.1%	-	-	-	-	intermediate	0.13	NO	no aberrant transcript			1-	1-	-	-
30883759	BRCA2	NM_000059.4	NM_000059.4:c.620C>T	0.919	0.781	0.150163	Δ(E7)	0.219	-	-	-	-	low	0.28	YES	Δ(E7) [FS]			2+	2+	Top1:ES:7:1%:Frameshift,Top2:ES:6-7:0.2%:inFrame,Top3:CD:-70:0.02%:Frameshift,Top4:ES:7-8:0.004%:inFrame	1
30883759	BRCA2	NM_000059.4	NM_000059.4:c.625C>T	0.919	0.925	-0.00652884	Δ(E5); Δ(E6q39_E7)	1.9%; 4.0%	Δ(E3)	0.017	-	-	no aberration	0.07	NO	no aberrant transcript			3-	3-	-	-
30883759	BRCA2	NM_000059.4	NM_000059.4:c.627C>A	0.919	0.959	-0.0435256	Δ(E5); Δ(E6q39_E7)	1.2%; 2.9%	-	-	-	-	no aberration	0.04	NO	no aberrant transcript			3-	3-	-	-
30883759	BRCA2	NM_000059.4	NM_000059.4:c.627C>G	0.919	0.971	-0.0565832	Δ(E6q39_E7)	0.029	-	-	-	-	no aberration	0.03	NO	no aberrant transcript			3-	3-	-	-
30883759	BRCA2	NM_000059.4	NM_000059.4:c.627C>T	0.919	0.965	-0.0500544	Δ(E6q39_E7)	0.035	-	-	-	-	no aberration	0.03	NO	no aberrant transcript			3-	3-	-	-
30883759	BRCA2	NM_000059.4	NM_000059.4:c.631G>A	0.919	0	1	Δ(E6q39_E7); Δ(E7)	4.5%; 91.0%	Δ(E7_E8)	0.028	742-nt	0.017	complete	0.81	YES	Δ(E7) [FS]			6+	6+	Top1:ES:7:1%:Frameshift,Top2:ES:6-7:0.2%:inFrame,Top3:CD:-70:0.02%:Frameshift,Top4:ES:7-8:0.004%:inFrame	1
30883759	BRCA2	NM_000059.4	NM_000059.4:c.631+1G>A	0.919	0	1	Δ(E6q39_E7); Δ(E7)	8.7%; 91.3%	-	-	-	-	complete	0.82	YES	Δ(E7) [FS]			6+	6+	Top1:ES:7:1%:Frameshift,Top2:ES:6-7:0.2%:inFrame,Top3:CD:-70:0.02%:Frameshift,Top4:ES:7-8:0.004%:inFrame	1
30883759	BRCA2	NM_000059.4	NM_000059.4:c.631+3A>G	0.919	0.078	0.915125	Δ(E7)	0.875	Δ(E7_E8)	0.047	-	-	high	0.71	YES	Δ(E7) [FS]			6+	6+	Top1:ES:7:1%:Frameshift,Top2:ES:6-7:0.2%:inFrame,Top3:CD:-70:0.02%:Frameshift,Top4:ES:7-8:0.004%:inFrame	1
30883759	BRCA2	NM_000059.4	NM_000059.4:c.632-3C>G	0.919	0	1	[Δ(E6q39_E7)▼(E8p2)]; ▼(E8p2)	25.1%; 74.9%	-	-	-	-	complete	0.95	YES	▼(I7) [IF,PTC]; ▼(E8p2) [FS]			5+	5+	Top1:CA:+4:0.8%:Frameshift,Top2:ES:8:0.03%:Frameshift,Top3:ES:8-9:0.02%:inFrame,Top4:ES:7-8:0.004%:inFrame	0
30883759	BRCA2	NM_000059.4	NM_000059.4:c.632-1G>C	0.919	0	1	Δ(E6q39_E8p4); Δ(E8p4)	30.9%; 67.9%	-	-	963-nt	0.012	complete	0.99	YES	▼(I7) [IF,PTC]; Δ(E8p4) [FS]			5+	5+	Top1:CA:+4:0.8%:Frameshift,Top2:ES:8:0.03%:Frameshift,Top3:ES:8-9:0.02%:inFrame,Top4:ES:7-8:0.004%:inFrame	1
30883759	BRCA2	NM_000059.4	NM_000059.4:c.681+4A>G	0.919	0	1	▼(E8q4)	0.927	Δ(E3)	0.018	971-nt; 868-nt	3.5%; 2.0%	complete	0.94	YES	▼(E8q4) [FS]; flagged	lost site/s do not match native site	no exon skipping or intron retention	6+	6+	Top1:CD:+5:0.06%:Frameshift,Top2:ES:8:0.04%:Frameshift,Top3:ES:8-9:0.02%:inFrame,Top4:ES:7-8:0.004%:inFrame	1
30883759	BRCA2	NM_000059.4	NM_000059.4:c.682-1G>C	0.919	0	1	Δ(E9)	1	-	-	-	-	complete	1	YES	Δ(E9) [FS]; Δ(E9p73) [FS]			6+	6+	Top1:ES:9-10:3%:Frameshift,Top2:CA:+73:0.5%:Frameshift,Top3:CA:+77:0.08%:Frameshift,Top4:CA:+11:0.05%:Frameshift	0
30883759	BRCA2	NM_000059.4	NM_000059.4:c.709G>T	0.919	0.973	-0.0587595	Δ(E5)	0.027	-	-	-	-	no aberration	0.04	NO	no aberrant transcript			3-	3-	-	-
30883759	BRCA2	NM_000059.4	NM_000059.4:c.741C>T	0.919	0.928	-0.00979325	Δ(E5); Δ(E6q39_E7)	4.7%; 2.5%	-	-	-	-	no aberration	0.06	NO	no aberrant transcript			3-	3-	-	-
30883759	BRCA2	NM_000059.4	NM_000059.4:c.746C>T	0.919	1	-0.0881393	-	-	-	-	-	-	no aberration	0.17	NO	no aberrant transcript			3-	3-	-	-
30883759	BRCA2	NM_000059.4	NM_000059.4:c.750G>A	0.919	1	-0.0881393	-	-	-	-	-	-	no aberration	0.02	NO	no aberrant transcript			3-	3-	-	-
30883759	BRCA2	NM_000059.4	NM_000059.4:c.752C>G	0.919	0.978	-0.0642002	Δ(E6q39_E7)	0.022	-	-	-	-	no aberration	0.05	NO	no aberrant transcript			3-	3-	-	-
30883759	BRCA2	NM_000059.4	NM_000059.4:c.756_757del	0.919	0.956	-0.0402612	Δ(E5); Δ(E6q39_E7)	2.2%; 2.2%	-	-	-	-	no aberration	0.04	-	-			NA	NA	-	-
30883759	BRCA2	NM_000059.4	NM_000059.4:c.772C>T	0.919	0.978	-0.0642002	Δ(E6q39_E7)	0.022	-	-	-	-	no aberration	0.01	NO	no aberrant transcript			3-	3-	-	-
30883759	BRCA2	NM_000059.4	NM_000059.4:c.793+1G>T	0.919	0	1	Δ(E9)	0.951	-	-	854-nt; 744-nt	2.8%; 2.2%	complete	1	YES	Δ(E9) [FS]			6+	6+	Top1:ES:9-10:2%:Frameshift,Top2:ES:9:0.02%:Frameshift,Top3:ES:8-9:0.02%:inFrame,Top4:CD:+437:0.003%:Frameshift	1
31191615	BRCA2	NM_000059.4	WT (mgBR2_14-20)	1	1	0	-	-	-	-	-	-	NA	NA	NA	NA			NA	NA	NA	NA
31191615	BRCA2	NM_000059.4	NM_000059.4:c.7008-5T>C	1	1	0	-	-	-	-	-	-	no aberration	0.12	NO	no aberrant transcript			3-	3-	-	-
31191615	BRCA2	NM_000059.4	NM_000059.4:c.7008-3C>G	1	0.072	0.928	Δ(E14)	0.793	Δ(E14p246)	0.134	-	-	high	0.92	YES	Δ(E14) [FS]			5+	5+	Top1:ES:14:0.1%:Frameshift,Top2:CA:-34:0.02%:inFrame,Top3:ES:13-14:0.01%:inFrame,Top4:ES:14-15:0.005%:Frameshift	1
31191615	BRCA2	NM_000059.4	NM_000059.4:c.7008-2A>T	1	0	1	Δ(E14); Δ(E14p10)	11.9%; 88.1%	-	-	-	-	complete	0.97	YES	Δ(E14) [FS]; Δ(E14p10) [FS]			6+	6+	Top1:ES:14:0.1%:Frameshift,Top2:CA:-34:0.02%:inFrame,Top3:ES:13-14:0.01%:inFrame,Top4:ES:14-15:0.005%:Frameshift	0
31191615	BRCA2	NM_000059.4	NM_000059.4:c.7008-1G>A	1	0	1	Δ(E14); Δ(E14p10)	13.5%; 86.5%	-	-	-	-	complete	0.97	YES	Δ(E14) [FS]			4+	4+	Top1:ES:14:0.1%:Frameshift,Top2:CA:-34:0.02%:inFrame,Top3:ES:13-14:0.01%:inFrame,Top4:ES:14-15:0.005%:Frameshift	0
31191615	BRCA2	NM_000059.4	NM_000059.4:c.7009A>G	1	1	0	-	-	-	-	-	-	no aberration	0	NO	no aberrant transcript			3-	3-	-	-
31191615	BRCA2	NM_000059.4	NM_000059.4:c.7010C>T	1	1	0	-	-	-	-	-	-	no aberration	0.01	NO	no aberrant transcript			3-	3-	-	-
31191615	BRCA2	NM_000059.4	NM_000059.4:c.7024C>T	1	1	0	-	-	-	-	-	-	no aberration	0.11	NO	no aberrant transcript			3-	3-	-	-
31191615	BRCA2	NM_000059.4	NM_000059.4:c.7030A>G	1	1	0	-	-	-	-	-	-	no aberration	0.09	NO	no aberrant transcript			3-	3-	-	-
31191615	BRCA2	NM_000059.4	NM_000059.4:c.7037A>G	1	1	0	-	-	-	-	-	-	no aberration	0.01	NO	no aberrant transcript			3-	3-	-	-
31191615	BRCA2	NM_000059.4	NM_000059.4:c.7157C>A	1	1	0	-	-	-	-	-	-	no aberration	0.01	NO	no aberrant transcript			3-	3-	-	-
31191615	BRCA2	NM_000059.4	NM_000059.4:c.7170T>G	1	1	0	-	-	-	-	-	-	no aberration	0.01	NO	no aberrant transcript			3-	3-	-	-
31191615	BRCA2	NM_000059.4	NM_000059.4:c.7177A>G	1	0.952	0.048	-	-	Δ(E14p256)	0.015	942-nt	0.033	low	0.46	YES	Δ(E14q259) [IF]			1+	1+	-	-
31191615	BRCA2	NM_000059.4	NM_000059.4:c.7180A>T	1	1	0	-	-	-	-	-	-	no aberration	0.01	NO	no aberrant transcript			3-	3-	-	-
31191615	BRCA2	NM_000059.4	NM_000059.4:c.7182A>G	1	1	0	-	-	-	-	-	-	no aberration	0.01	NO	no aberrant transcript			3-	3-	-	-
31191615	BRCA2	NM_000059.4	NM_000059.4:c.7203A>G	1	1	0	-	-	-	-	-	-	no aberration	0.02	NO	no aberrant transcript			3-	3-	-	-
31191615	BRCA2	NM_000059.4	NM_000059.4:c.7261C>G	1	1	0	-	-	-	-	-	-	no aberration	0.01	NO	no aberrant transcript			3-	3-	-	-
31191615	BRCA2	NM_000059.4	NM_000059.4:c.7266T>A	1	1	0	-	-	-	-	-	-	no aberration	0.1	NO	no aberrant transcript			3-	3-	-	-
31191615	BRCA2	NM_000059.4	NM_000059.4:c.7294A>G	1	1	0	-	-	-	-	-	-	no aberration	0.01	NO	no aberrant transcript			3-	3-	-	-
31191615	BRCA2	NM_000059.4	NM_000059.4:c.7296A>G	1	1	0	-	-	-	-	-	-	no aberration	0.01	NO	no aberrant transcript			3-	3-	-	-
31191615	BRCA2	NM_000059.4	NM_000059.4:c.7330G>T	1	1	0	-	-	-	-	-	-	no aberration	0	NO	no aberrant transcript			3-	3-	-	-
31191615	BRCA2	NM_000059.4	NM_000059.4:c.7339A>G	1	1	0	-	-	-	-	-	-	no aberration	0	NO	no aberrant transcript			3-	3-	-	-
31191615	BRCA2	NM_000059.4	NM_000059.4:c.7397T>C	1	1	0	-	-	-	-	-	-	no aberration	0.01	NO	no aberrant transcript			3-	3-	-	-
31191615	BRCA2	NM_000059.4	NM_000059.4:c.7418G>A	1	1	0	-	-	-	-	-	-	no aberration	0.03	NO	no aberrant transcript			3-	3-	-	-
31191615	BRCA2	NM_000059.4	NM_000059.4:c.7428A>G	1	1	0	-	-	-	-	-	-	no aberration	0.01	NO	no aberrant transcript			3-	3-	-	-
31191615	BRCA2	NM_000059.4	NM_000059.4:c.7435+1G>C	1	0	1	▼(E14q5)	1	-	-	-	-	complete	0.99	YES	Δ(E14) [FS];▼(E14q5) [FS]			6+	6+	Top1:ES:14:0.1%:Frameshift,Top2:CD:+6:0.02%:Frameshift,Top3:ES:13-14:0.01%:inFrame,Top4:ES:14-15:0.005%:Frameshift	1
31191615	BRCA2	NM_000059.4	NM_000059.4:c.7435+3A>G	1	1	0	-	-	-	-	-	-	no aberration	0.41	YES	Δ(E14) [FS]			0+	0+	Top1:ES:14:0.1%:Frameshift,Top2:CD:+6:0.02%:Frameshift,Top3:ES:13-14:0.01%:inFrame,Top4:ES:14-15:0.005%:Frameshift	0
31191615	BRCA2	NM_000059.4	NM_000059.4:c.7435+5T>C	1	1	0	-	-	-	-	-	-	no aberration	0.02	NO	no aberrant transcript			3-	3-	-	-
31191615	BRCA2	NM_000059.4	NM_000059.4:c.7435+6G>A	1	1	0	-	-	-	-	-	-	no aberration	0.05	NO	no aberrant transcript			3-	3-	-	-
31191615	BRCA2	NM_000059.4	NM_000059.4:c.7435+7T>G	1	1	0	-	-	-	-	-	-	no aberration	0.05	NO	no aberrant transcript			3-	3-	-	-
31191615	BRCA2	NM_000059.4	NM_000059.4:c.7435+10G>A	1	1	0	-	-	-	-	-	-	no aberration	0.04	NO	no aberrant transcript			3-	3-	-	-
31191615	BRCA2	NM_000059.4	NM_000059.4:c.7436-22C>T	1	1	0	-	-	-	-	-	-	no aberration	0.07	NO	no aberrant transcript			3-	3-	-	-
31191615	BRCA2	NM_000059.4	NM_000059.4:c.7436-14T>G	1	1	0	-	-	-	-	-	-	no aberration	0.02	NO	no aberrant transcript			3-	3-	-	-
31191615	BRCA2	NM_000059.4	NM_000059.4:c.7436-4A>G	1	1	0	-	-	-	-	-	-	no aberration	0.01	NO	no aberrant transcript			3-	3-	-	-
31191615	BRCA2	NM_000059.4	NM_000059.4:c.7436-4A>T	1	1	0	-	-	-	-	-	-	no aberration	0.01	NO	no aberrant transcript			3-	3-	-	-
31191615	BRCA2	NM_000059.4	NM_000059.4:c.7436-2A>T	1	0	1	Δ(E15p13)	1	-	-	-	-	complete	0.95	YES	Δ(E15p13) [FS]			6+	6+	Top1:CA:-18:0.4%:Frameshift,Top2:CA:+83:0.3%:Frameshift,Top3:CA:-341:0.3%:Frameshift,Top4:CA:-362:0.3%:Frameshift	0
31191615	BRCA2	NM_000059.4	NM_000059.4:c.7436-1G>A	1	0	1	Δ(E15p13); Δ(E15p83)	96.3%; 3.7%	-	-	-	-	complete	0.95	YES	Δ(E15) [FS]; Δ(E15p13) [FS]			6+	6+	Top1:CA:-18:0.4%:Frameshift,Top2:CA:+83:0.3%:Frameshift,Top3:CA:-341:0.3%:Frameshift,Top4:CA:-362:0.3%:Frameshift	0
31191615	BRCA2	NM_000059.4	NM_000059.4:c.7447A>G	1	0.899	0.101	-	-	Δ(E15p12)	0.101	-	-	low	0.51	YES	Δ(E15p12) [IF]			2+	2+	-	-
31191615	BRCA2	NM_000059.4	NM_000059.4:c.7466A>G	1	1	0	-	-	-	-	-	-	no aberration	0.02	NO	no aberrant transcript			3-	3-	-	-
31191615	BRCA2	NM_000059.4	NM_000059.4:c.7467T>C	1	1	0	-	-	-	-	-	-	no aberration	0.06	NO	no aberrant transcript			3-	3-	-	-
31191615	BRCA2	NM_000059.4	NM_000059.4:c.7471del	1	1	0	-	-	-	-	-	-	no aberration	0.04	-	-			NA	NA	-	-
31191615	BRCA2	NM_000059.4	NM_000059.4:c.7471C>T	1	1	0	-	-	-	-	-	-	no aberration	0.17	NO	no aberrant transcript			3-	3-	-	-
31191615	BRCA2	NM_000059.4	NM_000059.4:c.7472A>G	1	1	0	-	-	-	-	-	-	no aberration	0.03	NO	no aberrant transcript			3-	3-	-	-
31191615	BRCA2	NM_000059.4	NM_000059.4:c.7474_7475del	1	1	0	-	-	-	-	-	-	no aberration	0.05	-	-			NA	NA	-	-
31191615	BRCA2	NM_000059.4	NM_000059.4:c.7492A>G	1	1	0	-	-	-	-	-	-	no aberration	0.05	NO	no aberrant transcript			3-	3-	-	-
31191615	BRCA2	NM_000059.4	NM_000059.4:c.7501C>T	1	0.84	0.16	Δ(E15p83)	0.16	-	-	-	-	low	0.33	NO	no aberrant transcript			2-	2-	-	-
31191615	BRCA2	NM_000059.4	NM_000059.4:c.7544C>T	1	1	0	-	-	-	-	-	-	no aberration	0.04	NO	no aberrant transcript			3-	3-	-	-
31191615	BRCA2	NM_000059.4	NM_000059.4:c.7601C>T	1	1	0	-	-	-	-	-	-	no aberration	0.11	NO	no aberrant transcript			3-	3-	-	-
31191615	BRCA2	NM_000059.4	NM_000059.4:c.7611_7615del	1	1	0	-	-	-	-	-	-	no aberration	0.04	-	-			NA	NA	-	-
31191615	BRCA2	NM_000059.4	NM_000059.4:c.7617G>A	1	1	0	-	-	-	-	-	-	no aberration	0.55	YES	Δ(E15) [FS]			0+	0+	Top1:ES:15:0.2%:Frameshift,Top2:ES:15-16:0.1%:Frameshift,Top3:ES:14-15:0.005%:Frameshift	0
31191615	BRCA2	NM_000059.4	NM_000059.4:c.7617+1G>A	1	0	1	Δ(E15)	1	-	-	-	-	complete	0.98	YES	Δ(E15) [FS]			6+	6+	Top1:ES:15:0.2%:Frameshift,Top2:ES:15-16:0.1%:Frameshift,Top3:ES:14-15:0.005%:Frameshift	1
31191615	BRCA2	NM_000059.4	NM_000059.4:c.7617+1G>T	1	0	1	Δ(E15)	1	-	-	-	-	complete	0.98	YES	Δ(E15) [FS]			6+	6+	Top1:ES:15:0.2%:Frameshift,Top2:ES:15-16:0.1%:Frameshift,Top3:ES:14-15:0.005%:Frameshift	1
31191615	BRCA2	NM_000059.4	NM_000059.4:c.7617+2T>G	1	0	1	Δ(E15)	1	-	-	-	-	complete	0.98	YES	Δ(E15) [FS]			6+	6+	Top1:ES:15:0.2%:Frameshift,Top2:ES:15-16:0.1%:Frameshift,Top3:ES:14-15:0.005%:Frameshift	1
29881398	BRCA2	NM_000059.4	WT (mgBR2_14-20)	1	1	0	-	-	-	-	-	-	NA	NA	NA	NA			NA	NA	NA	NA
29881398	BRCA2	NM_000059.4	NM_000059.4:c.7618-2A>G	1	0	1	∆(E16p44)	0.972	-	-	954-nt	0.028	complete	0.99	YES	Δ(E16p44) [FS]; flagged	lost site/s do not match native site	Δ(E16) [FS]	6+	6+	Top1:CA:-262:2%:inFrame,Top2:CA:+44:0.6%:Frameshift,Top3:CA:+55:0.2%:Frameshift,Top4:ES:15-16:0.1%:Frameshift	1
29881398	BRCA2	NM_000059.4	NM_000059.4:c.7618-2A>T	1	0	1	∆(E16); ∆(E16p44); ∆(E16p55)	1.3%; 96.9%; 1.8%	-	-	-	-	complete	0.99	YES	Δ(E16p44) [FS]; flagged	lost site/s do not match native site	Δ(E16) [FS]	6+	6+	Top1:CA:-262:2%:inFrame,Top2:CA:+44:0.6%:Frameshift,Top3:CA:+55:0.2%:Frameshift,Top4:ES:15-16:0.1%:Frameshift	1
29881398	BRCA2	NM_000059.4	NM_000059.4:c.7618-1G>A	1	0	1	∆(E16); ∆(E16p44); ∆(E16p55); ∆(E16_E17p69)	0.7%; 91.5%; 4.7%; 1.4%	∆(E16p93)	0.017	-	-	complete	0.99	YES	Δ(E16p44) [FS]; flagged	lost site/s do not match native site	Δ(E16) [FS]	6+	6+	Top1:CA:-262:2%:inFrame,Top2:CA:+44:0.6%:Frameshift,Top3:CA:+55:0.2%:Frameshift,Top4:ES:15-16:0.1%:Frameshift	1
29881398	BRCA2	NM_000059.4	NM_000059.4:c.7618-1G>C	1	0	1	∆(E16); ∆(E16p44); ∆(E16p55); ∆(E16_E17p69)	2.8%; 92.6%; 1.9%; 0.9%	∆(E16p93)	0.011	893-nt	0.007	complete	0.99	YES	Δ(E16p44) [FS]; flagged	lost site/s do not match native site	Δ(E16) [FS]	6+	6+	Top1:CA:-262:2%:inFrame,Top2:CA:+44:0.6%:Frameshift,Top3:CA:+55:0.2%:Frameshift,Top4:ES:15-16:0.1%:Frameshift	1
29881398	BRCA2	NM_000059.4	NM_000059.4:c.7625C>G	1	1	0	-	-	-	-	-	-	no aberration	0.1	NO	no aberrant transcript			3-	3-	-	-
29881398	BRCA2	NM_000059.4	NM_000059.4:c.7738C>T	1	1	0	-	-	-	-	-	-	no aberration	0.18	NO	no aberrant transcript			3-	3-	-	-
29881398	BRCA2	NM_000059.4	NM_000059.4:c.7753G>A	1	1	0	-	-	-	-	-	-	no aberration	0.16	NO	no aberrant transcript			3-	3-	-	-
29881398	BRCA2	NM_000059.4	NM_000059.4:c.7772A>G	1	1	0	-	-	-	-	-	-	no aberration	0.04	NO	no aberrant transcript			3-	3-	-	-
29881398	BRCA2	NM_000059.4	NM_000059.4:c.7802A>G	1	0.543	0.457	Δ(E16q4)	0.457	-	-	-	-	intermediate	0.93	YES	Δ(E16q4) [FS]			5+	5+	-	-
29881398	BRCA2	NM_000059.4	NM_000059.4:c.7805G>C	1	0	1	∆(E16); ∆(E16q100); ▼(E16q20); ∆(E16_E17p69)	77.6%; 14.4%; 6.5%; 1.5%	-	-	-	-	complete	0.92	YES	Δ(E16q100) [FS]; flagged	lost site/s do not match native site	Δ(E16) [FS]	4+	6+	Top1:ES:15-16:0.1%:Frameshift,Top2:ES:16:0.07%:Frameshift,Top3:CD:-100:0.03%:Frameshift,Top4:ES:16-17:0.02%:Frameshift	1
29881398	BRCA2	NM_000059.4	NM_000059.4:c.7805+1G>A	1	0	1	∆(E16); ∆(E16q100); ∆(E16_E17p69)	88%; 10.1%; 1.9%	-	-	-	-	complete	0.98	YES	Δ(E16q100) [FS]; flagged	lost site/s do not match native site	Δ(E16) [FS]	4+	6+	Top1:ES:15-16:0.1%:Frameshift,Top2:ES:16:0.07%:Frameshift,Top3:CD:-100:0.03%:Frameshift,Top4:ES:16-17:0.02%:Frameshift	1
29881398	BRCA2	NM_000059.4	NM_000059.4:c.7805+3A>C	1	0.076	0.924	∆(E16); ∆(E16q100); ▼(E16q20)	75.3%; 13.3%; 3.8%	-	-	-	-	high	0.82	YES	Δ(E16q100) [FS]; flagged	lost site/s do not match native site	no exon skipping or intron retention	4+	4+	Top1:ES:15-16:0.1%:Frameshift,Top2:ES:16:0.07%:Frameshift,Top3:CD:-100:0.03%:Frameshift,Top4:ES:16-17:0.02%:Frameshift	1
28339459	BRCA2	NM_000059.4	WT (mgBR2_14-20)	1	1	0	-	-	-	-	-	-	NA	NA	NA	NA			NA	NA	NA	NA
28339459	BRCA2	NM_000059.4	NM_000059.4:c.7806-40A>G	1	1	0	-	-	-	-	-	-	no aberration	0	NO	no aberrant transcript			3-	3-	-	-
28339459	BRCA2	NM_000059.4	NM_000059.4:c.7806-9T>G	1	0	1	▼(E17p8)	0.363	Δ(E17); Δ(E17p69)	41.5%; 22.2%	-	-	complete	0.96	YES	Δ(E17) [IF];▼(E17p8) [FS]			5+	5+	Top1:ES:17-18:5%:Frameshift,Top2:ES:17:0.4%:inFrame,Top3:CA:+69:0.3%:inFrame,Top4:ES:16-17:0.02%:Frameshift	1
28339459	BRCA2	NM_000059.4	NM_000059.4:c.7806-2A>G	1	0	1	∆(E17p20)	0.518	Δ(E17); ∆(E17p69)	20.1%; 28.1%	-	-	complete	0.97	YES	Δ(E17) [IF]; Δ(E17p20) [FS]			5+	5+	Top1:ES:17-18:5%:Frameshift,Top2:ES:17:0.4%:inFrame,Top3:CA:+69:0.3%:inFrame,Top4:ES:16-17:0.02%:Frameshift	1
28339459	BRCA2	NM_000059.4	NM_000059.4:c.7806-1G>A	1	0	1	∆(E17p1)	1	-	-	-	-	complete	0.97	YES	Δ(E17p1) [FS]			6+	6+	Top1:ES:17-18:5%:Frameshift,Top2:ES:17:0.4%:inFrame,Top3:CA:+69:0.3%:inFrame,Top4:ES:16-17:0.02%:Frameshift	0
28339459	BRCA2	NM_000059.4	NM_000059.4:c.7806-1G>T	1	0	1	∆(E17p20)	1	-	-	-	-	complete	0.97	YES	Δ(E17) [IF]; Δ(E17p20) [FS]			6+	6+	Top1:ES:17-18:5%:Frameshift,Top2:ES:17:0.4%:inFrame,Top3:CA:+69:0.3%:inFrame,Top4:ES:16-17:0.02%:Frameshift	0
28339459	BRCA2	NM_000059.4	NM_000059.4:c.7806-2_7806-1dup	1	0	1	▼(E17p2) [2nt insertion due to duplication]	0.926	Δ(E17); Δ(E17p69)	5.1%; 2.3%	-	-	complete	0.96	-	-			NA	NA	-	-
28339459	BRCA2	NM_000059.4	NM_000059.4:c.7819A>C	1	1	0	-	-	-	-	-	-	no aberration	0.01	NO	no aberrant transcript			3-	3-	-	-
28339459	BRCA2	NM_000059.4	NM_000059.4:c.7875A>G	1	0.953	0.047	-	-	Δ(E17p69)	0.047	-	-	low	0.39	NO	no aberrant transcript			2-	2-	-	-
28339459	BRCA2	NM_000059.4	NM_000059.4:c.7940T>C	1	1	0	-	-	-	-	-	-	no aberration	0.02	NO	no aberrant transcript			3-	3-	-	-
28339459	BRCA2	NM_000059.4	NM_000059.4:c.7947A>G	1	1	0	-	-	-	-	-	-	no aberration	0.04	NO	no aberrant transcript			3-	3-	-	-
28339459	BRCA2	NM_000059.4	NM_000059.4:c.7952G>T	1	1	0	-	-	-	-	-	-	no aberration	0.04	NO	no aberrant transcript			3-	3-	-	-
28339459	BRCA2	NM_000059.4	NM_000059.4:c.7971A>G	1	1	0	-	-	-	-	-	-	no aberration	0.1	NO	no aberrant transcript			3-	3-	-	-
28339459	BRCA2	NM_000059.4	NM_000059.4:c.7975A>G	1	0.738	0.262	-	-	Δ(E17)	0.262	-	-	intermediate	0.51	YES	Δ(E17) [IF]			5+	5+	Top1:ES:17-18:4%:Frameshift,Top2:ES:17:0.4%:inFrame,Top3:CD:-151:0.05%:Frameshift,Top4:ES:16-17:0.02%:Frameshift	1
28339459	BRCA2	NM_000059.4	NM_000059.4:c.7976G>A	1	0	1	-	-	Δ(E17)	1	-	-	complete	0.82	YES	Δ(E17) [IF]			6+	6+	Top1:ES:17-18:4%:Frameshift,Top2:ES:17:0.4%:inFrame,Top3:CD:-151:0.05%:Frameshift,Top4:ES:16-17:0.02%:Frameshift	1
28339459	BRCA2	NM_000059.4	NM_000059.4:c.7976G>C	1	0	1	-	-	Δ(E17)	1	-	-	complete	0.88	YES	Δ(E17) [IF]			6+	6+	Top1:ES:17-18:4%:Frameshift,Top2:ES:17:0.4%:inFrame,Top3:CD:-151:0.05%:Frameshift,Top4:ES:16-17:0.02%:Frameshift	1
28339459	BRCA2	NM_000059.4	NM_000059.4:c.7976+1G>A	1	0	1	-	-	Δ(E17)	1	-	-	complete	0.93	YES	Δ(E17) [IF]			6+	6+	Top1:ES:17-18:4%:Frameshift,Top2:ES:17:0.4%:inFrame,Top3:CD:-151:0.05%:Frameshift,Top4:ES:16-17:0.02%:Frameshift	1
28339459	BRCA2	NM_000059.4	NM_000059.4:c.7976+35C>A	1	1	0	-	-	-	-	-	-	no aberration	0.01	NO	no aberrant transcript			3-	3-	-	-
28339459	BRCA2	NM_000059.4	NM_000059.4:c.7977-119A>T	1	1	0	-	-	-	-	-	-	no aberration	0	NO	no aberrant transcript			3-	3-	-	-
28339459	BRCA2	NM_000059.4	NM_000059.4:c.7977-7C>G	1	0	1	Δ(E18)	0.216	▼(E18p6)	0.784	-	-	complete	0.98	YES	▼(I17) [FS]; ▼(E18p6) [FS]			5+	5+	Top1:ES:17-18:4%:Frameshift,Top2:ES:18:0.2%:Frameshift,Top3:ES:18-19:0.004%:Frameshift,Top4:CA:-111:0.0009%:Frameshift	1
28339459	BRCA2	NM_000059.4	NM_000059.4:c.7977-6T>G	1	0.667	0.333	Δ(E18); Δ(E18p191)	31.0%; 2.3%	-	-	-	-	intermediate	0.03	NO	no aberrant transcript			1-	1-	-	-
28339459	BRCA2	NM_000059.4	NM_000059.4:c.7977-3_7978del	1	0	1	Δ(E18); Δ(E18p191)	90.0%; 10.0%	-	-	-	-	complete	0.98	-	-			NA	NA	-	-
28339459	BRCA2	NM_000059.4	NM_000059.4:c.7977-2A>T	1	0	1	Δ(E18); Δ(E18p191)	93.3%; 6.7%	-	-	-	-	complete	0.98	YES	Δ(E18) [FS]			6+	6+	Top1:ES:17-18:4%:Frameshift,Top2:ES:18:0.2%:Frameshift,Top3:ES:18-19:0.004%:Frameshift,Top4:CA:-111:0.0009%:Frameshift	0
28339459	BRCA2	NM_000059.4	NM_000059.4:c.7977-1G>C	1	0	1	Δ(E18); Δ(E18p191)	89.8%; 10.2%	-	-	-	-	complete	0.95	YES	Δ(E18) [FS]			6+	6+	Top1:ES:17-18:4%:Frameshift,Top2:ES:18:0.2%:Frameshift,Top3:ES:18-19:0.004%:Frameshift,Top4:CA:-111:0.0009%:Frameshift	0
28339459	BRCA2	NM_000059.4	NM_000059.4:c.7977-1G>T	1	0	1	Δ(E18); Δ(E18p191); Δ(E18p236)	91.5%; 7.0%; 1.5%	-	-	-	-	complete	0.98	YES	Δ(E18) [FS]			6+	6+	Top1:ES:17-18:4%:Frameshift,Top2:ES:18:0.2%:Frameshift,Top3:ES:18-19:0.004%:Frameshift,Top4:CA:-111:0.0009%:Frameshift	0
28339459	BRCA2	NM_000059.4	NM_000059.4:c.7984dupA	1	1	0	-	-	-	-	-	-	no aberration	0.01	-	-			NA	NA	-	-
28339459	BRCA2	NM_000059.4	NM_000059.4:c.7985C>G	1	0	1	Δ(E18); Δ(E18p191)	90.2%; 5.0%	-	-	other	0.048	complete	0.23	YES	▼(I17) [FS]			3+	3+	Top1:ES:17-18:4%:Frameshift,Top2:ES:18:0.2%:Frameshift,Top3:ES:18-19:0.004%:Frameshift,Top4:CA:-111:0.0009%:Frameshift	0
28339459	BRCA2	NM_000059.4	NM_000059.4:c.7985C>T	1	0.967	0.033	Δ(E18)	0.033	-	-	-	-	low	0.01	NO	no aberrant transcript			2-	2-	-	-
28339459	BRCA2	NM_000059.4	NM_000059.4:c.7988A>T	1	0.842	0.158	Δ(E18)	0.086	-	-	other	0.072	low	0.03	NO	no aberrant transcript			2-	2-	-	-
28339459	BRCA2	NM_000059.4	NM_000059.4:c.7992T>A	1	0.686	0.314	Δ(E18)	0.314	-	-	-	-	intermediate	0.02	NO	no aberrant transcript			1-	1-	-	-
28339459	BRCA2	NM_000059.4	NM_000059.4:c.8007A>G	1	0.848	0.152	Δ(E18)	0.152	-	-	-	-	low	0.04	NO	no aberrant transcript			2-	2-	-	-
28339459	BRCA2	NM_000059.4	NM_000059.4:c.8009C>A	1	0.04	0.96	Δ(E18); Δ(E18p191)	91.2%; 4.8%	-	-	-	-	high	0.18	NO	no aberrant transcript			0-	0-	-	-
28339459	BRCA2	NM_000059.4	NM_000059.4:c.8009C>G	1	0.799	0.201	Δ(E18)	0.201	-	-	-	-	intermediate	0.03	NO	no aberrant transcript			1-	1-	-	-
28339459	BRCA2	NM_000059.4	NM_000059.4:c.8009C>T	1	0.766	0.234	Δ(E18)	0.234	-	-	-	-	intermediate	0.02	NO	no aberrant transcript			1-	1-	-	-
28339459	BRCA2	NM_000059.4	NM_000059.4:c.8010_8032del	1	1	0	-	-	-	-	-	-	no aberration	0.02	-	-			NA	NA	-	-
28339459	BRCA2	NM_000059.4	NM_000059.4:c.8019A>G	1	1	0	-	-	-	-	-	-	no aberration	0.01	NO	no aberrant transcript			3-	3-	-	-
28339459	BRCA2	NM_000059.4	NM_000059.4:c.8023A>G	1	0	1	-	-	Δ(E18q309)	0.93	other	0.07	complete	0.99	YES	Δ(E18q309) [IF]			6+	6+	-	-
28339459	BRCA2	NM_000059.4	NM_000059.4:c.8027T>C	1	1	0	-	-	-	-	-	-	no aberration	0.01	NO	no aberrant transcript			3-	3-	-	-
28339459	BRCA2	NM_000059.4	NM_000059.4:c.8027T>A	1	1	0	-	-	-	-	-	-	no aberration	0.01	NO	no aberrant transcript			3-	3-	-	-
28339459	BRCA2	NM_000059.4	NM_000059.4:c.8035G>T	1	0.024	0.976	Δ(E18q298)	0.936	-	-	878-nt	0.04	high	0.98	YES	Δ(E18q298) [FS]			6+	6+	-	-
28339459	BRCA2	NM_000059.4	NM_000059.4:c.8039A>G	1	1	0	-	-	-	-	-	-	no aberration	0.01	NO	no aberrant transcript			3-	3-	-	-
28339459	BRCA2	NM_000059.4	NM_000059.4:c.8042C>G	1	0.977	0.023	Δ(E18)	0.023	-	-	-	-	low	0.01	NO	no aberrant transcript			2-	2-	-	-
28339459	BRCA2	NM_000059.4	NM_000059.4:c.8072C>T	1	0.949	0.051	Δ(E18)	0.051	-	-	-	-	low	0	NO	no aberrant transcript			2-	2-	-	-
28339459	BRCA2	NM_000059.4	NM_000059.4:c.8084C>T	1	1	0	-	-	-	-	-	-	no aberration	0	NO	no aberrant transcript			3-	3-	-	-
28339459	BRCA2	NM_000059.4	NM_000059.4:c.8111C>T	1	1	0	-	-	-	-	-	-	no aberration	0.01	NO	no aberrant transcript			3-	3-	-	-
28339459	BRCA2	NM_000059.4	NM_000059.4:c.8165C>G	1	1	0	-	-	-	-	-	-	no aberration	0.02	NO	no aberrant transcript			3-	3-	-	-
28339459	BRCA2	NM_000059.4	NM_000059.4:c.8168A>G	1	0.696	0.304	Δ(E18); Δ(E18q164)	4.5%; 25.9%	-	-	-	-	intermediate	0.23	NO	no aberrant transcript			1-	1-	-	-
28339459	BRCA2	NM_000059.4	NM_000059.4:c.8191C>T	1	1	0	-	-	-	-	-	-	no aberration	0.03	NO	no aberrant transcript			3-	3-	-	-
28339459	BRCA2	NM_000059.4	NM_000059.4:c.8219dup	1	1	0	-	-	-	-	-	-	no aberration	0.06	-	-			NA	NA	-	-
28339459	BRCA2	NM_000059.4	NM_000059.4:c.8249_8250del	1	0.93	0.07	Δ(E18)	0.07	-	-	-	-	low	0.17	-	-			NA	NA	-	-
28339459	BRCA2	NM_000059.4	NM_000059.4:c.8331G>A	1	0.407	0.593	Δ(E18)	0.52	-	-	other	0.073	intermediate	0.78	YES	Δ(E18) [FS]			5+	5+	Top1:ES:17-18:4%:Frameshift,Top2:CD:+563:2%:Frameshift,Top3:CD:+484:0.5%:inFrame,Top4:ES:18:0.1%:Frameshift	1
28339459	BRCA2	NM_000059.4	NM_000059.4:c.8331+1G>T	1	0	1	Δ(E18); Δ(E18q157); Δ(E17q151_E18)	81.0%; 6.4%; 6.1%	[▼(E17q58)Δ(E18)]	0.037	other	0.028	complete	0.93	YES	Δ(E18) [FS]			6+	6+	Top1:ES:17-18:4%:Frameshift,Top2:CD:+563:2%:Frameshift,Top3:CD:+484:0.5%:inFrame,Top4:ES:18:0.1%:Frameshift	1
28339459	BRCA2	NM_000059.4	NM_000059.4:c.8331+2T>C	1	0	1	Δ(E18); Δ(E17q151_E18)	87.1%; 12.9%	-	-	-	-	complete	0.93	YES	Δ(E18) [FS]			6+	6+	Top1:ES:17-18:4%:Frameshift,Top2:CD:+563:2%:Frameshift,Top3:CD:+484:0.5%:inFrame,Top4:ES:18:0.1%:Frameshift	1
25382762	BRCA2	NM_000059.4	WT (mgBR2_ex19-27)	1	1	0	-	-	-	-	-	-	NA	NA	NA	NA			NA	NA	NA	NA
25382762	BRCA2	NM_000059.4	NM_000059.4:c.8486A>T	1	0.2	0.8	-	-	Δ(E19)	0.8	-	-	high	0.54	YES	Δ(E19) [IF]			6+	6+	Top1:ES:19:8%:inFrame,Top2:ES:19-20:0.1%:Frameshift,Top3:CD:-124:0.01%:Frameshift,Top4:ES:18-19:0.004%:Frameshift	1
25382762	BRCA2	NM_000059.4	NM_000059.4:c.8488-1G>A	1	< 2%	0.98	▼(I19); Δ(E20)	43%; 28%	Δ(E20p12)	0.2	Ins-23nt ?	0.07	high	0.92	YES	Δ(E20) [FS]; Δ(E20p12) [IF]			5+	5+	Top1:ES:20:0.8%:Frameshift,Top2:ES:19-20:0.1%:Frameshift,Top3:ES:20-21:0.03%:inFrame,Top4:CA:-304:0.02%:inFrame	0
25382762	BRCA2	NM_000059.4	NM_000059.4:c.8633-24_8634del	1	0	1	Δ(E21)	1	-	-	-	-	complete	1	-	-			NA	NA	-	-
25382762	BRCA2	NM_000059.4	NM_000059.4:c.8647C>T	1	1	0	-	-	-	-	-	-	no aberration	0.01	NO	no aberrant transcript			3-	3-	-	-
25382762	BRCA2	NM_000059.4	NM_000059.4:c.8723T>G	1	1	0	-	-	-	-	-	-	no aberration	0.01	NO	no aberrant transcript			3-	3-	-	-
25382762	BRCA2	NM_000059.4	NM_000059.4:c.8732C>T	1	1	0	-	-	-	-	-	-	no aberration	0.04	NO	no aberrant transcript			3-	3-	-	-
25382762	BRCA2	NM_000059.4	NM_000059.4:c.8745_8748dup	1	1	0	-	-	-	-	-	-	no aberration	0.11	-	-			NA	NA	-	-
25382762	BRCA2	NM_000059.4	NM_000059.4:c.8754G>A	1	0	1	▼(E21q46)	1	-	-	-	-	complete	0.98	YES	▼(E21q46) [FS]			6+	6+	Top1:CD:+47:2%:Frameshift,Top2:ES:21:0.05%:Frameshift,Top3:CD:+9:0.03%:Frameshift,Top4:ES:20-21:0.03%:inFrame	1
25382762	BRCA2	NM_000059.4	NM_000059.4:c.8754+4A>G	1	0	1	▼(E21q46)	1	-	-	-	-	complete	0.74	YES	▼(E21q46) [FS]			6+	6+	Top1:CD:+47:2%:Frameshift,Top2:ES:21:0.05%:Frameshift,Top3:CD:+9:0.03%:Frameshift,Top4:ES:20-21:0.03%:inFrame	1
25382762	BRCA2	NM_000059.4	NM_000059.4:c.8754+5G>A	1	0	1	▼(E21q46)	1	-	-	-	-	complete	0.85	YES	▼(E21q46) [FS]			6+	6+	Top1:CD:+47:2%:Frameshift,Top2:ES:21:0.05%:Frameshift,Top3:CD:+9:0.03%:Frameshift,Top4:ES:20-21:0.03%:inFrame	1
25382762	BRCA2	NM_000059.4	NM_000059.4:c.8754+5G>T	1	0	1	▼(E21q46)	1	-	-	-	-	complete	0.85	YES	▼(E21q46) [FS]			6+	6+	Top1:CD:+47:2%:Frameshift,Top2:ES:21:0.05%:Frameshift,Top3:CD:+9:0.03%:Frameshift,Top4:ES:20-21:0.03%:inFrame	1
25382762	BRCA2	NM_000059.4	NM_000059.4:c.8755-1G>A	1	0	1	Δ(E22); Δ(E22p1)	17%; 83%	-	-	-	-	complete	0.99	YES	Δ(E22) [FS]; Δ(E22p1) [FS]			6+	6+	Top1:ES:22:3%:Frameshift,Top2:CA:+44:0.04%:Frameshift,Top3:CA:+11:0.04%:Frameshift,Top4:ES:22-23:0.02%:inFrame	0
25382762	BRCA2	NM_000059.4	NM_000059.4:c.8773C>T	1	1	0	-	-	-	-	-	-	no aberration	0.24	NO	no aberrant transcript			3-	3-	-	-
25382762	BRCA2	NM_000059.4	NM_000059.4:c.8789del	1	1	0	-	-	-	-	-	-	no aberration	0.09	-	-			NA	NA	-	-
25382762	BRCA2	NM_000059.4	NM_000059.4:c.8915T>G	1	1	0	-	-	-	-	-	-	no aberration	0	NO	no aberrant transcript			3-	3-	-	-
25382762	BRCA2	NM_000059.4	NM_000059.4:c.8948_8953+5del	1	0	1	Δ(E22); Δ(E22q7); ▼(I22)	52%; 23%; 25%	-	-	-	-	complete	0.99	-	-			NA	NA	-	-
25382762	BRCA2	NM_000059.4	NM_000059.4:c.8953+1G>T	1	0	1	Δ(E22); ▼(E22q4); ▼(I22)	44%; 17%; 39%	-	-	-	-	complete	0.99	YES	Δ(E22) [FS];▼(E22q4) [FS]			5+	5+	Top1:ES:22:3%:Frameshift,Top2:CD:+5:0.06%:Frameshift,Top3:ES:22-23:0.02%:inFrame,Top4:ES:21-22:0.01%:inFrame	1
25382762	BRCA2	NM_000059.4	NM_000059.4:c.9117G>A	1	0	1	Δ(E23)	1	-	-	-	-	complete	0.89	YES	Δ(E23) [FS]			6+	6+	Top1:ES:23:0.1%:Frameshift,Top2:ES:22-23:0.02%:inFrame,Top3:CD:-65:0.006%:Frameshift,Top4:CD:+17:0.003%:Frameshift	1
25382762	BRCA2	NM_000059.4	NM_000059.4:c.9256+1G>A	1	0	1	Δ(E24); Δ(E24q43)	74%; 26%	-	-	-	-	complete	1	YES	Δ(E24) [FS]			5+	5+	Top1:ES:24:0.007%:Frameshift,Top2:ES:23-24:0.003%:inFrame,Top3:ES:24-25:0.0009%:inFrame,Top4:CD:-51:0.0009%:inFrame	1
25382762	BRCA2	NM_000059.4	NM_000059.4:c.9257-18C>A	1	1	0	-	-	-	-	-	-	no aberration	0.01	NO	no aberrant transcript			3-	3-	-	-
25382762	BRCA2	NM_000059.4	NM_000059.4:c.9257-1G>C	1	0	1	-	-	Δ(E25p27)	1	-	-	complete	1	YES	Δ(E25p27) [IF]			6+	6+	Top1:ES:25:0.02%:Frameshift,Top2:CA:+27:0.02%:inFrame,Top3:ES:25-26:0.004%:Frameshift,Top4:CA:+144:0.003%:inFrame	1
25382762	BRCA2	NM_000059.4	NM_000059.4:c.9275_9278del	1	1	0	-	-	-	-	-	-	no aberration	0.01	-	-			NA	NA	-	-
25382762	BRCA2	NM_000059.4	NM_000059.4:c.9276T>G	1	1	0	-	-	-	-	-	-	no aberration	0	NO	no aberrant transcript			3-	3-	-	-
25382762	BRCA2	NM_000059.4	NM_000059.4:c.9301C>G	1	1	0	-	-	-	-	-	-	no aberration	0	NO	no aberrant transcript			3-	3-	-	-
25382762	BRCA2	NM_000059.4	NM_000059.4:c.9454G>A	1	1	0	-	-	-	-	-	-	no aberration	0	NO	no aberrant transcript			3-	3-	-	-
25382762	BRCA2	NM_000059.4	NM_000059.4:c.9466del	1	1	0	-	-	-	-	-	-	no aberration	0.02	-	-			NA	NA	-	-
25382762	BRCA2	NM_000059.4	NM_000059.4:c.9501G>A	1	1	0	-	-	-	-	-	-	no aberration	0.16	NO	no aberrant transcript			3-	3-	-	-
25382762	BRCA2	NM_000059.4	NM_000059.4:c.9501+3A>T	1	0.87	0.13	Δ(E25)	0.13	-	-	-	-	low	0.17	NO	no aberrant transcript			2-	2-	-	-
25382762	BRCA2	NM_000059.4	NM_000059.4:c.9501+4A>G	1	1	0	-	-	-	-	-	-	no aberration	0.02	NO	no aberrant transcript			3-	3-	-	-
25382762	BRCA2	NM_000059.4	NM_000059.4:c.9501+9A>C	1	1	0	-	-	-	-	-	-	no aberration	0	NO	no aberrant transcript			3-	3-	-	-
25382762	BRCA2	NM_000059.4	NM_000059.4:c.9502-12T>G	1	0.92	0.08	-	-	Δ(E26)	0.08	-	-	low	0.02	NO	no aberrant transcript			2-	2-	-	-
25382762	BRCA2	NM_000059.4	NM_000059.4:c.9502-2A>C	1	0	1	▼(E26p70); Δ(E26p28)	57%; 8%	Δ(E26)	0.33	-	-	complete	0.98	YES	Δ(E26) [IF]; Δ(E26p25) [FS]			5+	5+	Top1:ES:26:0.6%:inFrame,Top2:CA:-22:0.1%:inFrame,Top3:CA:+28:0.03%:Frameshift,Top4:CA:+25:0.03%:Frameshift	1
25382762	BRCA2	NM_000059.4	NM_000059.4:c.9550C>G	1	1	0	-	-	-	-	-	-	no aberration	0.01	NO	no aberrant transcript			3-	3-	-	-
25382762	BRCA2	NM_000059.4	NM_000059.4:c.9610A>G	1	1	0	-	-	-	-	-	-	no aberration	0.01	NO	no aberrant transcript			3-	3-	-	-
25382762	BRCA2	NM_000059.4	NM_000059.4:c.9611C>G	1	1	0	-	-	-	-	-	-	no aberration	0.01	NO	no aberrant transcript			3-	3-	-	-
25382762	BRCA2	NM_000059.4	NM_000059.4:c.9613_9614delGCinsCT	1	1	0	-	-	-	-	-	-	no aberration	0	-	-			NA	NA	-	-
25382762	BRCA2	NM_000059.4	NM_000059.4:c.9646C>T	1	1	0	-	-	-	-	-	-	no aberration	0.01	NO	no aberrant transcript			3-	3-	-	-
25382762	BRCA2	NM_000059.4	NM_000059.4:c.9649-5A>G	1	1	0	-	-	-	-	-	-	no aberration	0.06	NO	no aberrant transcript			3-	3-	-	-
25382762	BRCA2	NM_000059.4	NM_000059.4:c.9649-2A>G	1	0	1	Δ(E27p62); Δ(E27p424)	72%; 28%	-	-	-	-	complete	0.99	YES	Δ(E27p424) [FS]			5+	5+	Top1:CA:+62:3%:Frameshift,Top2:CA:-25:1%:inFrame,Top3:CA:+424:0.06%:Frameshift,Top4:CA:+88:0.05%:Frameshift	1
25382762	BRCA2	NM_000059.4	NM_000059.4:c.9698G>T	1	0.95	0.05	Δ(E27p62); Δ(E27p424)	<1%; 4%	-	-	-	-	low	0.36	YES	Δ(E27p62) [FS]			2+	2+	-	-
39780207	TP53	NM_000546.6	WT (mgTP53_2-9)	1	1	0	-	-	-	-	-	-	NA	NA	NA	NA			NA	NA	NA	NA
39780207	TP53	NM_000546.6	NM_000546.6:c.993G>C	1	0.202	0.798	▼(I9-mg); Δ(E9)	15%; 61.5%	-	-	773-nt	0.033	intermediate	0.64	YES, flagged	flagged	lost site/s do not match native site	Δ(E9) [FS]	3+	5+	Top1:CD:+329:29%:Frameshift,Top2:CD:+313:7%:inFrame,Top3:ES:9:0.06%:Frameshift,Top4:ES:8-9:0.04%:Frameshift	1
39780207	TP53	NM_000546.6	NM_000546.6:c.993G>T	1	0.253	0.747	▼(I9-mg); Δ(E9)	29.7%; 45%	-	-	-	-	intermediate	0.62	YES, flagged	flagged	lost site/s do not match native site	Δ(E9) [FS]	3+	5+	Top1:CD:+329:29%:Frameshift,Top2:CD:+313:7%:inFrame,Top3:ES:9:0.06%:Frameshift,Top4:ES:8-9:0.04%:Frameshift	1
39780207	TP53	NM_000546.6	NM_000546.6:c.992A>C	1	0.624	0.376	▼(I9-mg)	0.376	-	-	-	-	intermediate	0.33	NO	no aberrant transcript			1-	1-	-	-
39780207	TP53	NM_000546.6	NM_000546.6:c.992A>G	1	0.706	0.294	▼(I9-mg); Δ(E9)	19.5%; 9.9%	-	-	-	-	intermediate	0.36	YES, flagged	flagged	lost site/s do not match native site	no exon skipping or intron retention	1-	1-	-	-
39780207	TP53	NM_000546.6	NM_000546.6:c.992A>T	1	0.708	0.292	▼(I9-mg); Δ(E9)	24.5%; 4.7%	-	-	-	-	intermediate	0.35	YES, flagged	flagged	lost site/s do not match native site	no exon skipping or intron retention	1-	1-	-	-
39780207	TP53	NM_000546.6	NM_000546.6:c.923T>A	1	0.845	0.155	Δ(E9p5)	0.155	-	-	-	-	low	0.96	YES	Δ(E9p5) [FS]			2+	2+	-	-
39780207	TP53	NM_000546.6	NM_000546.6:c.922C>G	1	0	1	-	-	Δ(E9p3)	1	-	-	complete	0.99	YES	Δ(E9p3) [IF]			6+	6+	-	-
39780207	TP53	NM_000546.6	NM_000546.6:c.783-1G>A	1	0	1	▼(I7)	0.016	Δ(E8p24); ▼(E8p3)	48.2%; 50.2%	-	-	complete	1	YES	Δ(E8p24) [IF]			5+	5+	Top1:CA:-4:6%:inFrame,Top2:CA:+24:0.2%:inFrame,Top3:ES:8:0.05%:Frameshift,Top4:ES:8-9:0.04%:Frameshift	1
39780207	TP53	NM_000546.6	NM_000546.6:c.919G>T	1	1	0	-	-	-	-	-	-	no aberration	0.16	NO	no aberrant transcript			3-	3-	-	-
39780207	TP53	NM_000546.6	NM_000546.6:c.879G>T	1	0.772	0.228	-	-	Δ(E8q42)	0.228	-	-	intermediate	0.99	YES	Δ(E8q42) [IF]			5+	5+	-	-
39780207	TP53	NM_000546.6	NM_000546.6:c.837G>C	1	1	0	-	-	-	-	-	-	no aberration	0.71	YES	Δ(E8p57) [IF]			0+	0+	-	-
39780207	TP53	NM_000546.6	NM_000546.6:c.837G>T	1	1	0	-	-	-	-	-	-	no aberration	0.5	NO	no aberrant transcript			3-	3-	-	-
39780207	TP53	NM_000546.6	NM_000546.6:c.835G>A	1	0.7	0.3	-	-	Δ(E8p54)	0.3	-	-	intermediate	0.92	YES	Δ(E8p54) [IF]			5+	5+	-	-
39780207	TP53	NM_000546.6	NM_000546.6:c.834T>A	1	0.947	0.053	Δ(E8p53)	0.053	-	-	-	-	low	0.92	YES	Δ(E8p53) [FS]			2+	2+	-	-
39780207	TP53	NM_000546.6	NM_000546.6:c.817C>A	1	1	0	-	-	-	-	-	-	no aberration	0.05	NO	no aberrant transcript			3-	3-	-	-
39780207	TP53	NM_000546.6	NM_000546.6:c.816G>A	1	1	0	-	-	-	-	-	-	no aberration	0.02	NO	no aberrant transcript			3-	3-	-	-
39780207	TP53	NM_000546.6	NM_000546.6:c.812A>C	1	0.97	0.03	-	-	-	-	955-nt	0.03	low	0.01	NO	no aberrant transcript			2-	2-	-	-
39780207	TP53	NM_000546.6	NM_000546.6:c.811G>A	1	0.973	0.027	-	-	-	-	955-nt	0.027	low	0.01	NO	no aberrant transcript			2-	2-	-	-
39780207	TP53	NM_000546.6	NM_000546.6:c.811G>C	1	0.967	0.033	-	-	-	-	955-nt	0.033	low	0.32	NO	no aberrant transcript			2-	2-	-	-
39780207	TP53	NM_000546.6	NM_000546.6:c.797G>T	1	0.984	0.016	-	-	-	-	955-nt	0.016	low	0.17	NO	no aberrant transcript			2-	2-	-	-
39780207	TP53	NM_000546.6	NM_000546.6:c.784G>A	1	1	0	-	-	-	-	-	-	no aberration	0.52	YES	Δ(E8p3) [IF]			0+	0+	-	-
39780207	TP53	NM_000546.6	NM_000546.6:c.782+1G>A	1	0	1	Δ(E7); ▼(I7)	10.3%; 89.7%	-	-	-	-	complete	0.99	YES, flagged	flagged	lost site/s do not match native site	Δ(E7) [FS]	3+	4+	Top1:ES:7:0.03%:Frameshift,Top2:ES:6-7:0.01%:Frameshift,Top3:ES:7-8:0.005%:Frameshift	0
39780207	TP53	NM_000546.6	NM_000546.6:c.782G>A	1	0.576	0.424	Δ(E7); ▼(I7)	2.6%; 39.8%	-	-	-	-	intermediate	0.27	YES, flagged	flagged	lost site/s do not match native site	Δ(E7) [FS]	3+	4+	Top1:ES:7:0.03%:Frameshift,Top2:ES:6-7:0.01%:Frameshift,Top3:ES:7-8:0.005%:Frameshift	0
39780207	TP53	NM_000546.6	NM_000546.6:c.782G>C	1	0.166	0.834	Δ(E7); ▼(I7)	5.7%; 77.7%	-	-	-	-	high	0.64	YES, flagged	flagged	lost site/s do not match native site	Δ(E7) [FS]	3+	4+	Top1:ES:7:0.03%:Frameshift,Top2:ES:6-7:0.01%:Frameshift,Top3:ES:7-8:0.005%:Frameshift	0
39780207	TP53	NM_000546.6	NM_000546.6:c.782G>T	1	0.118	0.882	Δ(E7); ▼(I7)	30.3%; 57.9%	-	-	-	-	high	0.53	YES	Δ(E7) [FS]			5+	5+	Top1:ES:7:0.03%:Frameshift,Top2:ES:6-7:0.01%:Frameshift,Top3:ES:7-8:0.005%:Frameshift	1
39780207	TP53	NM_000546.6	NM_000546.6:c.781A>C	1	1	0	-	-	-	-	-	-	no aberration	0.03	NO	no aberrant transcript			3-	3-	-	-
39780207	TP53	NM_000546.6	NM_000546.6:c.781A>G	1	1	0	-	-	-	-	-	-	no aberration	0.04	NO	no aberrant transcript			3-	3-	-	-
39780207	TP53	NM_000546.6	NM_000546.6:c.781A>T	1	0.952	0.048	-	-	Δ(E7q36)	0.02	955-nt	0.028	low	0.05	NO	no aberrant transcript			2-	2-	-	-
39780207	TP53	NM_000546.6	NM_000546.6:c.710T>G	1	0.952	0.048	Δ(E7p38)	0.048	-	-	-	-	low	0.58	YES	Δ(E7p38) [FS]			2+	2+	-	-
39780207	TP53	NM_000546.6	NM_000546.6:c.673G>C	1	1	0	-	-	-	-	-	-	no aberration	0.13	NO	no aberrant transcript			3-	3-	-	-
39780207	TP53	NM_000546.6	NM_000546.6:c.672+1G>A	1	0	1	▼(E6q5); Δ(E6)	89.9%; 5.8%	-	-	925-nt; 1005-nt	2.3%; 2.1%	complete	0.99	YES	▼(E6q5) [FS]; Δ(E6) [FS]			6+	6+	Top1:ES:6:3%:Frameshift,Top2:CD:+6:0.3%:Frameshift,Top3:ES:5-6:0.04%:inFrame,Top4:CD:-24:0.02%:inFrame	1
39780207	TP53	NM_000546.6	NM_000546.6:c.673-1G>A	1	0	1	▼(E7p49); Δ(E7p1); ▼(I6)	63.4%; 21.5%; 7.7%	-	-	320-nt; 1050-nt; 1155-nt	2.5%; 3.5%; 1.4%	complete	1	YES	Δ(E7p1) [FS]; Δ(E7) [FS]			5+	5+	Top1:CA:+47:0.4%:Frameshift,Top2:CA:-50:0.08%:Frameshift,Top3:ES:7:0.03%:Frameshift,Top4:CA:-70:0.03%:inFrame	1
39780207	TP53	NM_000546.6	NM_000546.6:c.672G>C	1	0	1	▼(E6q5); Δ(E6)	93.9%; 6.1%	-	-	-	-	complete	0.98	YES	▼(E6q5) [FS]; flagged	lost site/s do not match native site	Δ(E6) [FS]	6+	6+	Top1:ES:6:3%:Frameshift,Top2:CD:+6:0.3%:Frameshift,Top3:ES:5-6:0.04%:inFrame,Top4:CD:-24:0.02%:inFrame	1
39780207	TP53	NM_000546.6	NM_000546.6:c.672G>T	1	0	1	▼(E6q5); Δ(E6)	95.7%; 4.3%	-	-	-	-	complete	0.97	YES	▼(E6q5) [FS]; flagged	lost site/s do not match native site	Δ(E6) [FS]	6+	6+	Top1:ES:6:3%:Frameshift,Top2:CD:+6:0.3%:Frameshift,Top3:ES:5-6:0.04%:inFrame,Top4:CD:-24:0.02%:inFrame	1
39780207	TP53	NM_000546.6	NM_000546.6:c.671A>C	1	0	1	▼(E6q5); Δ(E6)	87.6%; 7.1%	-	-	1043-nt	0.053	complete	0.77	YES, flagged	flagged	lost site/s do not match native site	Δ(E6) [FS]	3+	4+	Top1:ES:6:3%:Frameshift,Top2:CD:+6:0.3%:Frameshift,Top3:ES:5-6:0.04%:inFrame,Top4:CD:-24:0.02%:inFrame	1
39780207	TP53	NM_000546.6	NM_000546.6:c.671A>G	1	0.52	0.48	▼(E6q5); Δ(E6)	23.4%; 24.6%	-	-	-	-	intermediate	0.73	YES	Δ(E6) [FS]			5+	5+	Top1:ES:6:3%:Frameshift,Top2:CD:+6:0.3%:Frameshift,Top3:ES:5-6:0.04%:inFrame,Top4:CD:-24:0.02%:inFrame	1
39780207	TP53	NM_000546.6	NM_000546.6:c.671A>T	1	0.059	0.941	▼(E6q5); Δ(E6)	81.2% 12.9%	-	-	-	-	high	0.85	YES	▼(E6q5) [FS]; flagged	lost site/s do not match native site	Δ(E6) [FS]	6+	6+	Top1:ES:6:3%:Frameshift,Top2:CD:+6:0.3%:Frameshift,Top3:ES:5-6:0.04%:inFrame,Top4:CD:-24:0.02%:inFrame	1
39780207	TP53	NM_000546.6	NM_000546.6:c.597A>T	1	0.33	0.67	Δ(E6q77); Δ(E6); ▼(E6q5)	55%; 10.3%; 1.6%	-	-	-	-	intermediate	0.42	YES, flagged	flagged	lost site/s do not match native site	Δ(E6) [FS]	3+	4+	-	-
39780207	TP53	NM_000546.6	NM_000546.6:c.560G>C	1	0.373	0.627	Δ(E6)	0.627	-	-	-	-	intermediate	0.29	YES	Δ(E6) [FS]			5+	5+	Top1:ES:6:3%:Frameshift,Top2:CA:+17:1%:Frameshift,Top3:CA:-30:0.06%:Frameshift,Top4:ES:5-6:0.04%:inFrame	1
39780207	TP53	NM_000546.6	NM_000546.6:c.560G>T	1	0.418	0.582	Δ(E6)	0.582	-	-	-	-	intermediate	0.38	YES	Δ(E6) [FS]			5+	5+	Top1:ES:6:3%:Frameshift,Top2:CA:+17:1%:Frameshift,Top3:CA:-30:0.06%:Frameshift,Top4:ES:5-6:0.04%:inFrame	1
39780207	TP53	NM_000546.6	NM_000546.6:c.559+1G>A	1	0	1	Δ(E5q46); ▼(I5)	90.9%; 5.9%	-	-	953-nt	0.033	complete	1	YES	Δ(E5q46) [FS]; flagged	lost site/s do not match native site	▼(I5) [IF,PTC]	6+	6+	Top1:CD:-46:0.4%:Frameshift,Top2:ES:5-6:0.04%:inFrame,Top3:CD:-161:0.03%:Frameshift,Top4:ES:5:0.03%:Frameshift	1
39780207	TP53	NM_000546.6	NM_000546.6:c.560-2A>C	1	0	1	Δ(E6p17); Δ(E6); ▼(I5)	78.2%; 16.6%; 2.6%	-	-	-	-	complete	0.98	YES	Δ(E6p17) [FS]; Δ(E6) [FS]			6+	6+	Top1:ES:6:3%:Frameshift,Top2:CA:+17:1%:Frameshift,Top3:CA:-30:0.06%:Frameshift,Top4:ES:5-6:0.04%:inFrame	1
39780207	TP53	NM_000546.6	NM_000546.6:c.559G>A	1	0	1	Δ(E5q46)	0.889	-	-	417-nt	0.111	complete	0.56	NO	no aberrant transcript			0-	0-	-	-
39780207	TP53	NM_000546.6	NM_000546.6:c.559G>C	1	0	1	Δ(E5q46)	1	-	-	-	-	complete	0.4	NO	no aberrant transcript			0-	0-	-	-
39780207	TP53	NM_000546.6	NM_000546.6:c.559G>T	1	0.219	0.781	Δ(E5q46); ▼(I5)	69.8%; 5.2%	-	-	953-nt; 1000-nt	1.2%; 1.9%	intermediate	0.4	NO	no aberrant transcript			1-	1-	-	-
39780207	TP53	NM_000546.6	NM_000546.6:c.551A>G	1	0.378	0.622	-	-	Δ(E5q9)	0.622	-	-	intermediate	0.98	YES	Δ(E5q9) [IF]			5+	5+	-	-
39780207	TP53	NM_000546.6	NM_000546.6:c.516T>A	1	0.738	0.262	Δ(E5q46)	0.262	-	-	-	-	intermediate	0.5	NO	no aberrant transcript			1-	1-	-	-
39780207	TP53	NM_000546.6	NM_000546.6:c.410T>A	1	0	1	-	-	Δ(E5p36)	1	-	-	complete	0.7	NO	no aberrant transcript			0-	0-	-	-
39780207	TP53	NM_000546.6	NM_000546.6:c.376-1G>A	1	0	1	-	-	Δ(E5p21)	1	-	-	complete	1	YES	Δ(E5p21) [IF]; flagged	lost site/s do not match native site	no exon skipping or intron retention	6+	6+	Top1:CA:+21:0.2%:inFrame,Top2:ES:5-6:0.04%:inFrame,Top3:ES:5:0.03%:Frameshift,Top4:CA:-61:0.02%:inFrame	1
39780207	TP53	NM_000546.6	NM_000546.6:c.374C>G	1	1	0	-	-	-	-	-	-	no aberration	0.15	NO	no aberrant transcript			3-	3-	-	-
39780207	TP53	NM_000546.6	NM_000546.6:c.368C>G	1	0.599	0.401	-	-	Δ(E4q12)	0.401	-	-	intermediate	0.95	YES	Δ(E4q12) [IF]			5+	5+	-	-
39780207	TP53	NM_000546.6	NM_000546.6:c.362C>A	1	0.828	0.172	Δ(E4q16)	0.172	-	-	-	-	low	0.89	YES	Δ(E4q16) [FS]			2+	2+	-	-
39780207	TP53	NM_000546.6	NM_000546.6:c.359A>G	1	0.175	0.825	Δ(E4q16); Δ(E4q16_E5)	67.5%; 6.4%	-	-	364-nt	0.086	high	0.93	YES	Δ(E4q16) [FS]; flagged	lost site/s do not match native site	no exon skipping or intron retention	5+	5+	Top1:ES:4:1%:inFrame,Top2:CD:-200:0.9%:Frameshift,Top3:CD:+392:0.4%:Frameshift,Top4:CD:+110:0.2%:Frameshift	0
39780207	TP53	NM_000546.6	NM_000546.6:c.356C>G	1	0.051	0.949	Δ(E4q20); Δ(E4q200)	24.0%; 70.9%	-	-	-	-	high	0.82	YES	Δ(E4q20) [FS]; flagged	lost site/s do not match native site	no exon skipping or intron retention	5+	5+	Top1:ES:4:1%:inFrame,Top2:CD:-200:0.9%:Frameshift,Top3:CD:+392:0.4%:Frameshift,Top4:CD:+110:0.2%:Frameshift	1
39780207	TP53	NM_000546.6	NM_000546.6:c.325T>A	1	1	0	-	-	-	-	-	-	no aberration	0.64	YES	Δ(E4q53) [FS]			0+	0+	-	-
39780207	TP53	NM_000546.6	NM_000546.6:c.318C>G	1	0	1	Δ(E4q58)	1	-	-	-	-	complete	1	YES	Δ(E4q58) [FS]; flagged	lost site/s do not match native site	no exon skipping or intron retention	6+	6+	-	-
39780207	TP53	NM_000546.6	NM_000546.6:c.315C>T	1	0.841	0.159	Δ(E4q200); Δ(E4q62)	13.0%; 3.0%	-	-	-	-	low	0.73	NO	no aberrant transcript			2-	2-	-	-
39780207	TP53	NM_000546.6	NM_000546.6:c.314G>T	1	0.136	0.864	-	-	Δ(E4q63)	0.864	-	-	high	0.98	YES	Δ(E4q63) [IF]; flagged	lost site/s do not match native site	no exon skipping or intron retention	6+	6+	-	-
39780207	TP53	NM_000546.6	NM_000546.6:c.236C>G	1	0.458	0.542	Δ(E4q140)	0.542	-	-	-	-	intermediate	0.8	YES	Δ(E4q140) [FS]			5+	5+	-	-
39780207	TP53	NM_000546.6	NM_000546.6:c.206C>T	1	0.345	0.655	Δ(E4q200)	0.035	Δ(E4q171)	0.621	-	-	intermediate	0.61	NO	no aberrant transcript			1-	1-	-	-
39780207	TP53	NM_000546.6	NM_000546.6:c.182A>G	1	0.118	0.882	Δ(E4q194)	0.882	-	-	-	-	high	0.98	YES	Δ(E4q194) [FS]			6+	6+	-	-
39780207	TP53	NM_000546.6	NM_000546.6:c.178C>A	1	0.074	0.926	Δ(E4q200)	0.905	-	-	887-nt	0.021	high	0.67	YES	Δ(E4q200) [FS]			6+	6+	-	-
39780207	TP53	NM_000546.6	NM_000546.6:c.178C>G	1	0.679	0.321	Δ(E4q200)	0.321	-	-	-	-	intermediate	0.5	YES	Δ(E4q200) [FS]			5+	5+	-	-
39780207	TP53	NM_000546.6	NM_000546.6:c.114A>G	1	1	0	-	-	-	-	-	-	no aberration	0.61	YES	Δ(E4p18) [IF]			0+	0+	-	-
39780207	TP53	NM_000546.6	NM_000546.6:c.97-1G>A	1	0	1	Δ(E4p19)	0.153	Δ(E4)	0.847	-	-	complete	0.99	YES	Δ(E4p19) [FS]; flagged	lost site/s do not match native site	Δ(E4) [IF]	6+	6+	Top1:ES:4:1%:inFrame,Top2:CA:+19:0.3%:Frameshift,Top3:ES:3-4:0.05%:Frameshift,Top4:CA:+204:0.005%:inFrame	1
39780207	TP53	NM_000546.6	NM_000546.6:c.50A>T	1	0	1	Δ(E2q26)	0.923	-	-	1063-nt; 973-nt	2.2%; 5.5%	complete	0.99	YES	Δ(E2q26) [FS]; flagged	lost site/s do not match native site	no exon skipping or intron retention	6+	6+	Top1:ES:2:0.5%:inFrame,Top2:CD:-31:0.01%:Frameshift,Top3:ES:2-3:0.002%:Frameshift,Top4:CD:-47:0.0005%:Frameshift	0
39780207	TP53	NM_000546.6	NM_000546.6:c.46C>A	1	0.47	0.53	Δ(E2q31)	0.53	-	-	-	-	intermediate	0.84	YES	Δ(E2q31) [FS]			5+	5+	-	-
40341019	TP53	NM_000546.6	WT (mgTP53_2-9)	1	1	0	-	-	-	-	-	-	NA	NA	NA	NA			NA	NA	NA	NA
40341019	TP53	NM_000546.6	NM_000546.6:c.75-2A>G	1	0	1	Δ(E3); Δ(E3_E4p19)	27.5%; 34.5%	Δ(E3_E4); ▼(I2)	31.4%; 3.8%	785-nt	0.028	complete	0.99	YES	▼(I2) [IF,PTC]			4+	4+	Top1:ES:3:0.3%:Frameshift,Top2:ES:3-4:0.05%:Frameshift,Top3:ES:2-3:0.002%:Frameshift	1
40341019	TP53	NM_000546.6	NM_000546.6:c.96+1G>T	1	0	1	Δ(E3)	1	-	-	-	-	complete	1	YES	Δ(E3) [FS]			6+	6+	Top1:ES:3:0.3%:Frameshift,Top2:ES:3-4:0.05%:Frameshift,Top3:CD:+13:0.01%:inFrame,Top4:CD:-6:0.004%:inFrame	1
40341019	TP53	NM_000546.6	NM_000546.6:c.96+31_96+54del	1	0.949	0.051	-	-	Δ(E4)	0.026	954-nt	0.025	low	0.05	-	-			NA	NA	-	-
40341019	TP53	NM_000546.6	NM_000546.6:c.581_585del	1	0.933	0.067	Δ(E5q91_E6)	0.067	-	-	-	-	low	0.01	-	-			NA	NA	-	-
40341019	TP53	NM_000546.6	NM_000546.6:c.628_639del	1	0.983	0.017	Δ(E6)	0.017	-	-	-	-	low	0.21	-	-			NA	NA	-	-
40341019	TP53	NM_000546.6	NM_000546.6:c.655_670del	1	0.027	0.973	▼(E6del5q130)	0.069	Δ(E6q21)	0.904	-	-	high	0.93	-	-			NA	NA	-	-
40341019	TP53	NM_000546.6	NM_000546.6:c.82G>T	1	0.85	0.15	Δ(E6); Δ(E3)	5.3%; 9.7%	-	-	-	-	low	0.02	NO	no aberrant transcript			2-	2-	-	-
40341019	TP53	NM_000546.6	NM_000546.6:c.94C>A	1	0.975	0.025	Δ(E3_E4p19)	0.025	-	-	-	-	low	0	NO	no aberrant transcript			2-	2-	-	-
40341019	TP53	NM_000546.6	NM_000546.6:c.95T>A	1	0.956	0.044	-	-	-	-	1000-nt; 954-nt	1.9%; 2.5%	low	0	NO	no aberrant transcript			2-	2-	-	-
40341019	TP53	NM_000546.6	NM_000546.6:c.96G>C	1	0.96	0.04	Δ(E3)	0.04	-	-	-	-	low	0.04	NO	no aberrant transcript			2-	2-	-	-
40341019	TP53	NM_000546.6	NM_000546.6:c.96G>T	1	0.833	0.167	Δ(E3)	0.167	-	-	-	-	low	0.04	NO	no aberrant transcript			2-	2-	-	-
40341019	TP53	NM_000546.6	NM_000546.6:c.590T>G	1	0.954	0.046	Δ(E6)	0.046	-	-	-	-	low	0.13	NO	no aberrant transcript			2-	2-	-	-
40341019	TP53	NM_000546.6	NM_000546.6:c.592G>A	1	0.983	0.017	Δ(E6)	0.017	-	-	-	-	low	0.05	NO	no aberrant transcript			2-	2-	-	-
40341019	TP53	NM_000546.6	NM_000546.6:c.592G>C	1	0.987	0.013	Δ(E6)	0.013	-	-	-	-	low	0.07	NO	no aberrant transcript			2-	2-	-	-
40341019	TP53	NM_000546.6	NM_000546.6:c.592G>T	1	0.741	0.259	Δ(E6)	0.259	-	-	-	-	intermediate	0.35	YES	Δ(E6) [FS]			5+	5+	Top1:ES:6:3%:Frameshift,Top2:CA:+17:1%:Frameshift,Top3:CA:-30:0.06%:Frameshift,Top4:ES:5-6:0.04%:inFrame	1
40341019	TP53	NM_000546.6	NM_000546.6:c.593A>C	1	0.979	0.021	Δ(E6)	0.021	-	-	-	-	low	0.13	NO	no aberrant transcript			2-	2-	-	-
40341019	TP53	NM_000546.6	NM_000546.6:c.593A>T	1	0.795	0.205	Δ(E6)	0.205	-	-	-	-	intermediate	0.25	YES, flagged	flagged	lost site/s do not match native site	Δ(E6) [FS]	3+	5+	-	-
40341019	TP53	NM_000546.6	NM_000546.6:c.594A>G	1	0.955	0.045	Δ(E6)	0.045	-	-	-	-	low	0.13	NO	no aberrant transcript			2-	2-	-	-
40341019	TP53	NM_000546.6	NM_000546.6:c.619G>C	1	0.969	0.031	Δ(E6)	0.031	-	-	-	-	low	0.19	NO	no aberrant transcript			2-	2-	-	-
40341019	TP53	NM_000546.6	NM_000546.6:c.619G>T	1	0.914	0.086	Δ(E6)	0.086	-	-	-	-	low	0.25	YES, flagged	flagged	lost site/s do not match native site	Δ(E6) [FS]	1+	2+	-	-
40341019	TP53	NM_000546.6	NM_000546.6:c.622G>T	1	0.835	0.165	Δ(E6)	0.165	-	-	-	-	low	0.09	NO	no aberrant transcript			2-	2-	-	-
40341019	TP53	NM_000546.6	NM_000546.6:c.626G>T	1	0.976	0.024	Δ(E6)	0.024	-	-	-	-	low	0.04	NO	no aberrant transcript			2-	2-	-	-
40341019	TP53	NM_000546.6	NM_000546.6:c.627A>T	1	0.96	0.04	Δ(E6)	0.04	-	-	-	-	low	0.06	NO	no aberrant transcript			2-	2-	-	-
40341019	TP53	NM_000546.6	NM_000546.6:c.661G>T	1	0.92	0.08	Δ(E6)	0.08	-	-	-	-	low	0.19	NO	no aberrant transcript			2-	2-	-	-
40341019	TP53	NM_000546.6	NM_000546.6:c.662A>G	1	0.922	0.078	Δ(E6)	0.078	-	-	-	-	low	0.09	NO	no aberrant transcript			2-	2-	-	-
40341019	TP53	NM_000546.6	NM_000546.6:c.662A>T	1	0.896	0.104	Δ(E6)	0.104	-	-	-	-	low	0.03	NO	no aberrant transcript			2-	2-	-	-
40341019	TP53	NM_000546.6	NM_000546.6:c.666G>C	1	0.974	0.026	Δ(E6)	0.026	-	-	-	-	low	0.12	NO	no aberrant transcript			2-	2-	-	-
40341019	TP53	NM_000546.6	NM_000546.6:c.672+7T>C	1	0.89	0.11	Δ(E6)	0.11	-	-	-	-	low	0.14	NO	no aberrant transcript			2-	2-	-	-
40341019	TP53	NM_000546.6	NM_000546.6:c.672+7T>G	1	0.901	0.099	Δ(E6)	0.099	-	-	-	-	low	0.14	NO	no aberrant transcript			2-	2-	-	-
40341019	TP53	NM_000546.6	NM_000546.6:c.672+18G>A	1	0.857	0.143	Δ(E6)	0.143	-	-	-	-	low	0.15	NO	no aberrant transcript			2-	2-	-	-
40341019	TP53	NM_000546.6	NM_000546.6:c.672+26G>A	1	0.977	0.023	Δ(E6)	0.023	-	-	-	-	low	0.1	NO	no aberrant transcript			2-	2-	-	-
40341019	TP53	NM_000546.6	NM_000546.6:c.672+26G>C	1	0.919	0.081	Δ(E6)	0.081	-	-	-	-	low	0.2	YES	▼(E6q63) [IF,PTC]			1+	1+	-	-
40341019	TP53	NM_000546.6	NM_000546.6:c.672+27G>C	1	0.972	0.028	Δ(E6)	0.028	-	-	-	-	low	0.11	NO	no aberrant transcript			2-	2-	-	-
40341019	TP53	NM_000546.6	NM_000546.6:c.672+56C>A	1	0.975	0.025	Δ(E6)	0.025	-	-	-	-	low	0.01	NO	no aberrant transcript			2-	2-	-	-
40341019	TP53	NM_000546.6	NM_000546.6:c.75A>C	1	1	0	-	-	-	-	-	-	no aberration	0.01	NO	no aberrant transcript			3-	3-	-	-
40341019	TP53	NM_000546.6	NM_000546.6:c.75A>G	1	1	0	-	-	-	-	-	-	no aberration	0	NO	no aberrant transcript			3-	3-	-	-
40341019	TP53	NM_000546.6	NM_000546.6:c.75A>T	1	1	0	-	-	-	-	-	-	no aberration	0.03	NO	no aberrant transcript			3-	3-	-	-
40341019	TP53	NM_000546.6	NM_000546.6:c.76C>A	1	1	0	-	-	-	-	-	-	no aberration	0	NO	no aberrant transcript			3-	3-	-	-
40341019	TP53	NM_000546.6	NM_000546.6:c.76C>G	1	1	0	-	-	-	-	-	-	no aberration	0.05	NO	no aberrant transcript			3-	3-	-	-
40341019	TP53	NM_000546.6	NM_000546.6:c.76C>T	1	1	0	-	-	-	-	-	-	no aberration	0.01	NO	no aberrant transcript			3-	3-	-	-
40341019	TP53	NM_000546.6	NM_000546.6:c.77T>A	1	1	0	-	-	-	-	-	-	no aberration	0	NO	no aberrant transcript			3-	3-	-	-
40341019	TP53	NM_000546.6	NM_000546.6:c.77T>C	1	1	0	-	-	-	-	-	-	no aberration	0	NO	no aberrant transcript			3-	3-	-	-
40341019	TP53	NM_000546.6	NM_000546.6:c.77T>G	1	1	0	-	-	-	-	-	-	no aberration	0	NO	no aberrant transcript			3-	3-	-	-
40341019	TP53	NM_000546.6	NM_000546.6:c.78T>A	1	1	0	-	-	-	-	-	-	no aberration	0.01	NO	no aberrant transcript			3-	3-	-	-
40341019	TP53	NM_000546.6	NM_000546.6:c.78T>C	1	1	0	-	-	-	-	-	-	no aberration	0	NO	no aberrant transcript			3-	3-	-	-
40341019	TP53	NM_000546.6	NM_000546.6:c.78T>G	1	1	0	-	-	-	-	-	-	no aberration	0	NO	no aberrant transcript			3-	3-	-	-
40341019	TP53	NM_000546.6	NM_000546.6:c.79C>A	1	1	0	-	-	-	-	-	-	no aberration	0.01	NO	no aberrant transcript			3-	3-	-	-
40341019	TP53	NM_000546.6	NM_000546.6:c.79C>G	1	1	0	-	-	-	-	-	-	no aberration	0	NO	no aberrant transcript			3-	3-	-	-
40341019	TP53	NM_000546.6	NM_000546.6:c.79C>T	1	1	0	-	-	-	-	-	-	no aberration	0.01	NO	no aberrant transcript			3-	3-	-	-
40341019	TP53	NM_000546.6	NM_000546.6:c.80C>A	1	1	0	-	-	-	-	-	-	no aberration	0	NO	no aberrant transcript			3-	3-	-	-
40341019	TP53	NM_000546.6	NM_000546.6:c.80C>G	1	1	0	-	-	-	-	-	-	no aberration	0	NO	no aberrant transcript			3-	3-	-	-
40341019	TP53	NM_000546.6	NM_000546.6:c.80C>T	1	1	0	-	-	-	-	-	-	no aberration	0.01	NO	no aberrant transcript			3-	3-	-	-
40341019	TP53	NM_000546.6	NM_000546.6:c.81T>A	1	1	0	-	-	-	-	-	-	no aberration	0.01	NO	no aberrant transcript			3-	3-	-	-
40341019	TP53	NM_000546.6	NM_000546.6:c.81T>C	1	1	0	-	-	-	-	-	-	no aberration	0	NO	no aberrant transcript			3-	3-	-	-
40341019	TP53	NM_000546.6	NM_000546.6:c.81T>G	1	1	0	-	-	-	-	-	-	no aberration	0.01	NO	no aberrant transcript			3-	3-	-	-
40341019	TP53	NM_000546.6	NM_000546.6:c.82G>A	1	1	0	-	-	-	-	-	-	no aberration	0.01	NO	no aberrant transcript			3-	3-	-	-
40341019	TP53	NM_000546.6	NM_000546.6:c.82G>C	1	1	0	-	-	-	-	-	-	no aberration	0.01	NO	no aberrant transcript			3-	3-	-	-
40341019	TP53	NM_000546.6	NM_000546.6:c.83A>C	1	1	0	-	-	-	-	-	-	no aberration	0	NO	no aberrant transcript			3-	3-	-	-
40341019	TP53	NM_000546.6	NM_000546.6:c.83A>G	1	1	0	-	-	-	-	-	-	no aberration	0	NO	no aberrant transcript			3-	3-	-	-
40341019	TP53	NM_000546.6	NM_000546.6:c.83A>T	1	1	0	-	-	-	-	-	-	no aberration	0.01	NO	no aberrant transcript			3-	3-	-	-
40341019	TP53	NM_000546.6	NM_000546.6:c.84A>C	1	1	0	-	-	-	-	-	-	no aberration	0.01	NO	no aberrant transcript			3-	3-	-	-
40341019	TP53	NM_000546.6	NM_000546.6:c.84A>G	1	1	0	-	-	-	-	-	-	no aberration	0.01	NO	no aberrant transcript			3-	3-	-	-
40341019	TP53	NM_000546.6	NM_000546.6:c.84A>T	1	1	0	-	-	-	-	-	-	no aberration	0.01	NO	no aberrant transcript			3-	3-	-	-
40341019	TP53	NM_000546.6	NM_000546.6:c.85A>C	1	1	0	-	-	-	-	-	-	no aberration	0	NO	no aberrant transcript			3-	3-	-	-
40341019	TP53	NM_000546.6	NM_000546.6:c.85A>G	1	1	0	-	-	-	-	-	-	no aberration	0.01	NO	no aberrant transcript			3-	3-	-	-
40341019	TP53	NM_000546.6	NM_000546.6:c.85A>T	1	1	0	-	-	-	-	-	-	no aberration	0	NO	no aberrant transcript			3-	3-	-	-
40341019	TP53	NM_000546.6	NM_000546.6:c.86A>C	1	1	0	-	-	-	-	-	-	no aberration	0	NO	no aberrant transcript			3-	3-	-	-
40341019	TP53	NM_000546.6	NM_000546.6:c.86A>G	1	1	0	-	-	-	-	-	-	no aberration	0	NO	no aberrant transcript			3-	3-	-	-
40341019	TP53	NM_000546.6	NM_000546.6:c.86A>T	1	1	0	-	-	-	-	-	-	no aberration	0	NO	no aberrant transcript			3-	3-	-	-
40341019	TP53	NM_000546.6	NM_000546.6:c.87C>A	1	1	0	-	-	-	-	-	-	no aberration	0.01	NO	no aberrant transcript			3-	3-	-	-
40341019	TP53	NM_000546.6	NM_000546.6:c.87C>G	1	1	0	-	-	-	-	-	-	no aberration	0	NO	no aberrant transcript			3-	3-	-	-
40341019	TP53	NM_000546.6	NM_000546.6:c.87C>T	1	1	0	-	-	-	-	-	-	no aberration	0.01	NO	no aberrant transcript			3-	3-	-	-
40341019	TP53	NM_000546.6	NM_000546.6:c.88A>C	1	1	0	-	-	-	-	-	-	no aberration	0	NO	no aberrant transcript			3-	3-	-	-
40341019	TP53	NM_000546.6	NM_000546.6:c.88A>G	1	1	0	-	-	-	-	-	-	no aberration	0.01	NO	no aberrant transcript			3-	3-	-	-
40341019	TP53	NM_000546.6	NM_000546.6:c.88A>T	1	1	0	-	-	-	-	-	-	no aberration	0	NO	no aberrant transcript			3-	3-	-	-
40341019	TP53	NM_000546.6	NM_000546.6:c.89A>C	1	1	0	-	-	-	-	-	-	no aberration	0	NO	no aberrant transcript			3-	3-	-	-
40341019	TP53	NM_000546.6	NM_000546.6:c.89A>G	1	1	0	-	-	-	-	-	-	no aberration	0	NO	no aberrant transcript			3-	3-	-	-
40341019	TP53	NM_000546.6	NM_000546.6:c.89A>T	1	1	0	-	-	-	-	-	-	no aberration	0	NO	no aberrant transcript			3-	3-	-	-
40341019	TP53	NM_000546.6	NM_000546.6:c.90C>A	1	1	0	-	-	-	-	-	-	no aberration	0.01	NO	no aberrant transcript			3-	3-	-	-
40341019	TP53	NM_000546.6	NM_000546.6:c.90C>G	1	1	0	-	-	-	-	-	-	no aberration	0.18	NO	no aberrant transcript			3-	3-	-	-
40341019	TP53	NM_000546.6	NM_000546.6:c.90C>T	1	1	0	-	-	-	-	-	-	no aberration	0.01	NO	no aberrant transcript			3-	3-	-	-
40341019	TP53	NM_000546.6	NM_000546.6:c.91G>A	1	1	0	-	-	-	-	-	-	no aberration	0.01	NO	no aberrant transcript			3-	3-	-	-
40341019	TP53	NM_000546.6	NM_000546.6:c.91G>C	1	1	0	-	-	-	-	-	-	no aberration	0	NO	no aberrant transcript			3-	3-	-	-
40341019	TP53	NM_000546.6	NM_000546.6:c.91G>T	1	1	0	-	-	-	-	-	-	no aberration	0	NO	no aberrant transcript			3-	3-	-	-
40341019	TP53	NM_000546.6	NM_000546.6:c.92T>A	1	1	0	-	-	-	-	-	-	no aberration	0	NO	no aberrant transcript			3-	3-	-	-
40341019	TP53	NM_000546.6	NM_000546.6:c.92T>C	1	1	0	-	-	-	-	-	-	no aberration	0	NO	no aberrant transcript			3-	3-	-	-
40341019	TP53	NM_000546.6	NM_000546.6:c.92T>G	1	1	0	-	-	-	-	-	-	no aberration	0.01	NO	no aberrant transcript			3-	3-	-	-
40341019	TP53	NM_000546.6	NM_000546.6:c.93T>A	1	1	0	-	-	-	-	-	-	no aberration	0.01	NO	no aberrant transcript			3-	3-	-	-
40341019	TP53	NM_000546.6	NM_000546.6:c.93T>C	1	1	0	-	-	-	-	-	-	no aberration	0	NO	no aberrant transcript			3-	3-	-	-
40341019	TP53	NM_000546.6	NM_000546.6:c.93T>G	1	1	0	-	-	-	-	-	-	no aberration	0	NO	no aberrant transcript			3-	3-	-	-
40341019	TP53	NM_000546.6	NM_000546.6:c.94C>G	1	1	0	-	-	-	-	-	-	no aberration	0.01	NO	no aberrant transcript			3-	3-	-	-
40341019	TP53	NM_000546.6	NM_000546.6:c.94C>T	1	1	0	-	-	-	-	-	-	no aberration	0.01	NO	no aberrant transcript			3-	3-	-	-
40341019	TP53	NM_000546.6	NM_000546.6:c.95T>C	1	1	0	-	-	-	-	-	-	no aberration	0.01	NO	no aberrant transcript			3-	3-	-	-
40341019	TP53	NM_000546.6	NM_000546.6:c.95T>G	1	1	0	-	-	-	-	-	-	no aberration	0	NO	no aberrant transcript			3-	3-	-	-
40341019	TP53	NM_000546.6	NM_000546.6:c.96G>A	1	1	0	-	-	-	-	-	-	no aberration	0.06	NO	no aberrant transcript			3-	3-	-	-
40341019	TP53	NM_000546.6	NM_000546.6:c.575A>T	1	1	0	-	-	-	-	-	-	no aberration	0.31	NO	no aberrant transcript			3-	3-	-	-
40341019	TP53	NM_000546.6	NM_000546.6:c.577C>T	1	1	0	-	-	-	-	-	-	no aberration	0.09	NO	no aberrant transcript			3-	3-	-	-
40341019	TP53	NM_000546.6	NM_000546.6:c.586C>A	1	1	0	-	-	-	-	-	-	no aberration	0.08	NO	no aberrant transcript			3-	3-	-	-
40341019	TP53	NM_000546.6	NM_000546.6:c.586C>T	1	1	0	-	-	-	-	-	-	no aberration	0.21	YES, flagged	flagged	lost site/s do not match native site	no exon skipping or intron retention	0+	3-	-	-
40341019	TP53	NM_000546.6	NM_000546.6:c.587G>C	1	1	0	-	-	-	-	-	-	no aberration	0.07	NO	no aberrant transcript			3-	3-	-	-
40341019	TP53	NM_000546.6	NM_000546.6:c.587G>T	1	1	0	-	-	-	-	-	-	no aberration	0.14	NO	no aberrant transcript			3-	3-	-	-
40341019	TP53	NM_000546.6	NM_000546.6:c.588A>G	1	1	0	-	-	-	-	-	-	no aberration	0.08	NO	no aberrant transcript			3-	3-	-	-
40341019	TP53	NM_000546.6	NM_000546.6:c.593A>G	1	1	0	-	-	-	-	-	-	no aberration	0.15	NO	no aberrant transcript			3-	3-	-	-
40341019	TP53	NM_000546.6	NM_000546.6:c.595G>T	1	1	0	-	-	-	-	-	-	no aberration	0.14	NO	no aberrant transcript			3-	3-	-	-
40341019	TP53	NM_000546.6	NM_000546.6:c.596G>T	1	1	0	-	-	-	-	-	-	no aberration	0.04	NO	no aberrant transcript			3-	3-	-	-
40341019	TP53	NM_000546.6	NM_000546.6:c.619G>A	1	1	0	-	-	-	-	-	-	no aberration	0.13	NO	no aberrant transcript			3-	3-	-	-
40341019	TP53	NM_000546.6	NM_000546.6:c.620A>C	1	1	0	-	-	-	-	-	-	no aberration	0.06	NO	no aberrant transcript			3-	3-	-	-
40341019	TP53	NM_000546.6	NM_000546.6:c.620A>G	1	1	0	-	-	-	-	-	-	no aberration	0.26	YES, flagged	flagged	lost site/s do not match native site	Δ(E6) [FS]	0+	0+	-	-
40341019	TP53	NM_000546.6	NM_000546.6:c.620A>T	1	1	0	-	-	-	-	-	-	no aberration	0.2	YES, flagged	flagged	lost site/s do not match native site	no exon skipping or intron retention	0+	3-	-	-
40341019	TP53	NM_000546.6	NM_000546.6:c.622G>A	1	1	0	-	-	-	-	-	-	no aberration	0.07	NO	no aberrant transcript			3-	3-	-	-
40341019	TP53	NM_000546.6	NM_000546.6:c.623A>T	1	1	0	-	-	-	-	-	-	no aberration	0.09	NO	no aberrant transcript			3-	3-	-	-
40341019	TP53	NM_000546.6	NM_000546.6:c.624C>T	1	1	0	-	-	-	-	-	-	no aberration	0.12	NO	no aberrant transcript			3-	3-	-	-
40341019	TP53	NM_000546.6	NM_000546.6:c.625A>T	1	1	0	-	-	-	-	-	-	no aberration	0.09	NO	no aberrant transcript			3-	3-	-	-
40341019	TP53	NM_000546.6	NM_000546.6:c.628A>T	1	1	0	-	-	-	-	-	-	no aberration	0.03	NO	no aberrant transcript			3-	3-	-	-
40341019	TP53	NM_000546.6	NM_000546.6:c.638G>A	1	1	0	-	-	-	-	-	-	no aberration	0.08	NO	no aberrant transcript			3-	3-	-	-
40341019	TP53	NM_000546.6	NM_000546.6:c.638G>C	1	1	0	-	-	-	-	-	-	no aberration	0.14	NO	no aberrant transcript			3-	3-	-	-
40341019	TP53	NM_000546.6	NM_000546.6:c.638G>T	1	1	0	-	-	-	-	-	-	no aberration	0.13	NO	no aberrant transcript			3-	3-	-	-
40341019	TP53	NM_000546.6	NM_000546.6:c.660T>A	1	1	0	-	-	-	-	-	-	no aberration	0.09	NO	no aberrant transcript			3-	3-	-	-
40341019	TP53	NM_000546.6	NM_000546.6:c.660T>G	1	1	0	-	-	-	-	-	-	no aberration	0.06	NO	no aberrant transcript			3-	3-	-	-
40341019	TP53	NM_000546.6	NM_000546.6:c.661G>A	1	1	0	-	-	-	-	-	-	no aberration	0.08	NO	no aberrant transcript			3-	3-	-	-
40341019	TP53	NM_000546.6	NM_000546.6:c.664C>T	1	1	0	-	-	-	-	-	-	no aberration	0.04	NO	no aberrant transcript			3-	3-	-	-
40341019	TP53	NM_000546.6	NM_000546.6:c.666G>T	1	1	0	-	-	-	-	-	-	no aberration	0.05	NO	no aberrant transcript			3-	3-	-	-
40341019	TP53	NM_000546.6	NM_000546.6:c.672+7T>A	1	1	0	-	-	-	-	-	-	no aberration	0.14	NO	no aberrant transcript			3-	3-	-	-
40341019	TP53	NM_000546.6	NM_000546.6:c.672+16G>C	1	1	0	-	-	-	-	-	-	no aberration	0.03	NO	no aberrant transcript			3-	3-	-	-
40341019	TP53	NM_000546.6	NM_000546.6:c.672+23C>A	1	1	0	-	-	-	-	-	-	no aberration	0.01	NO	no aberrant transcript			3-	3-	-	-
40341019	TP53	NM_000546.6	NM_000546.6:c.672+26G>T	1	1	0	-	-	-	-	-	-	no aberration	0.07	NO	no aberrant transcript			3-	3-	-	-
40341019	TP53	NM_000546.6	NM_000546.6:c.672+27G>A	1	1	0	-	-	-	-	-	-	no aberration	0.08	NO	no aberrant transcript			3-	3-	-	-
40341019	TP53	NM_000546.6	NM_000546.6:c.672+32G>A	1	1	0	-	-	-	-	-	-	no aberration	0.01	NO	no aberrant transcript			3-	3-	-	-
40341019	TP53	NM_000546.6	NM_000546.6:c.672+32G>C	1	1	0	-	-	-	-	-	-	no aberration	0.04	NO	no aberrant transcript			3-	3-	-	-
40341019	TP53	NM_000546.6	NM_000546.6:c.672+32G>T	1	1	0	-	-	-	-	-	-	no aberration	0.01	NO	no aberrant transcript			3-	3-	-	-
40341019	TP53	NM_000546.6	NM_000546.6:c.672+33G>C	1	1	0	-	-	-	-	-	-	no aberration	0.3	YES	▼(E6q63) [IF,PTC]			0+	0+	-	-
40341019	TP53	NM_000546.6	NM_000546.6:c.672+34G>C	1	1	0	-	-	-	-	-	-	no aberration	0.37	YES	▼(E6q63) [IF,PTC]			0+	0+	-	-
40341019	TP53	NM_000546.6	NM_000546.6:c.672+40G>C	1	1	0	-	-	-	-	-	-	no aberration	0.13	NO	no aberrant transcript			3-	3-	-	-
40341019	TP53	NM_000546.6	NM_000546.6:c.672+41G>C	1	1	0	-	-	-	-	-	-	no aberration	0.13	NO	no aberrant transcript			3-	3-	-	-
40341019	TP53	NM_000546.6	NM_000546.6:c.672+42G>C	1	1	0	-	-	-	-	-	-	no aberration	0.12	NO	no aberrant transcript			3-	3-	-	-
40341019	TP53	NM_000546.6	NM_000546.6:c.672+47T>C	1	1	0	-	-	-	-	-	-	no aberration	0.04	NO	no aberrant transcript			3-	3-	-	-
40341019	TP53	NM_000546.6	NM_000546.6:c.96+14_96+18del	1	1	0	-	-	-	-	-	-	no aberration	0.04	-	-			NA	NA	-	-
40341019	TP53	NM_000546.6	NM_000546.6:c.96+55_97-41del	1	1	0	-	-	-	-	-	-	no aberration	0.08	-	-			NA	NA	-	-
40341019	TP53	NM_000546.6	NM_000546.6:c.96+10_96+25del	1	1	0	-	-	-	-	-	-	no aberration	0.05	-	-			NA	NA	-	-
40341019	TP53	NM_000546.6	NM_000546.6:c.96+31_96+41del	1	1	0	-	-	-	-	-	-	no aberration	0.05	-	-			NA	NA	-	-
40341019	TP53	NM_000546.6	NM_000546.6:c.96+47_97-41del	1	0.948	0.052	-	-	Δ(E4)	0.052	-	-	low	0.03	-	-			NA	NA	-	-
40341019	TP53	NM_000546.6	NM_000546.6:c.672+7_672+27del	1	0.871	0.129	Δ(E6)	0.129	-	-	-	-	low	0.72	-	-			NA	NA	-	-
40341019	TP53	NM_000546.6	NM_000546.6:c.672+15_672+27del	1	0.923	0.077	Δ(E6)	0.077	-	-	-	-	low	0.73	-	-			NA	NA	-	-
40341019	TP53	NM_000546.6	NM_000546.6:c.672+14_672+36del	1	0.444	0.556	▼(E6q40); Δ(E6)	31.6%; 22.7%	-	-	1040-nt	0.013	intermediate	0.97	-	-			NA	NA	-	-
40341019	TP53	NM_000546.6	NM_000546.6:c.672+29_672+49del	1	0.912	0.088	Δ(E6)	0.088	-	-	-	-	low	0.98	-	-			NA	NA	-	-
40341019	TP53	NM_000546.6	NM_000546.6:c.672+39_672+46del	1	0.977	0.023	Δ(E6)	0.023	-	-	-	-	low	0.64	-	-			NA	NA	-	-
40341019	TP53	NM_000546.6	NM_000546.6:c.672+70_672+80del	1	1	0	-	-	-	-	-	-	no aberration	0.04	-	-			NA	NA	-	-
40341019	TP53	NM_000546.6	NM_000546.6:c.573_598del	1	0.772	0.228	Δ(E6)	0.228	-	-	-	-	intermediate	0.31	-	-			NA	NA	-	-
40341019	TP53	NM_000546.6	NM_000546.6:c.618_641del	1	0.7	0.3	Δ(E6)	0.3	-	-	-	-	intermediate	0.73	-	-			NA	NA	-	-
40341019	TP53	NM_000546.6	NM_000546.6:c.653_669del	1	0.191	0.809	Δ(E6)	0.809	-	-	-	-	high	0.78	-	-			NA	NA	-	-

## Sheet: S4
Supplementary Table 4. Variants tested by RT-PCR minigene assay and reported in ClinVar with clinical classifications
# HGVS descriptions for transcripts are reported in the original publications (see Reference PMIDs).
# Notes for CHEK2 assay results : OTHER - the native start codon is eliminated; 5'UTR - affects the 5'UTR only
# Non-deleterious in-frame transcripts (variant construct): transcripts assigned with either Supporting evidence weight or N/A in the original publications (see Reference PMIDs) for ATM, CHEK2, PALB2, RAD51C, RAD51D, and TP53; for BRCA2, transcripts assigned with either Supporting evidence weight or N/A according to the ClinGen ENIGMA Variant Curation Expert Panel Specifications V1.2
# Majority rule approach used to assign Summary classification for variants with conflicting classifications: a variant classification with a higher number of submissions is chosen as the summary classification. If there are equal numbers of VUS and P/LP, or VUS and B/LB, the variant is assigned a VUS summary classification. If the variant classification is mixed with P/LP, VUS, and B/LB assertio…
Reference (PMID)	Gene	RefSeq transcript	HGVSc	HGVSp	Variant type (based on VEP consequence annotation)	Location	Canonical transcript from WT construct	Canonical transcript from variant construct	CT reduction: (WT-variant)/WT	PTC transcript	PTC transcript proportions	In-frame transcript	In-frame transcript proportions	Uncharacterised	Uncharacterised transcript proportions	Level of splicing aberration	Background splicing (predicted LOF transcripts in WT construct)	Predicted non-LOF in-frame transcripts (variant construct)	Percentage of predicted LOF transcripts (variant construct)	Binned percentage of predicted LOF transcripts (variant construct)	SpliceAI max delta score (raw)	ClinVar ID	ClinVar review status	ClinVar classification	Conflicting ClinVar classification	Summary classification (based on ClinVar or majority rule approach)	Reference set for LR analyses	ClinVar accession number per submission
33333735	RAD51C	NM_058216.3	NM_058216.3:c.146-3C>T	-	splice_polypyrimidine_tract_variant	intron,splice_region	0.986	1	-0.014	-	-	-	-	-	-	no aberration		-	0	≤20	0.17	409838	criteria_provided,_conflicting_classifications	Conflicting_classifications_of_pathogenicity	Uncertain_significance(1)|Likely_benign(5)	LB	YES	SCV000550191|SCV001140712|SCV001172057|SCV001348040|SCV003917953|SCV005886939
33333735	RAD51C	NM_058216.3	NM_058216.3:c.404G>A	NP_478123.1:p.Cys135Tyr	missense_variant,splice_region_variant	exon,splice_region	0.986	0	1	▼(E2q27); Δ(E2q175); Δ(E2q22); Δ(E2)	69.3%; 19.9%; 4.3%; 2.4%	-	-	913-nt	0.041	complete		-	95.9	≥80	0.85	234175	criteria_provided,_multiple_submitters,_no_conflicts	Pathogenic/Likely_pathogenic	NA	P/LP	NO	SCV000278700|SCV000550186|SCV000839327|SCV000909441|SCV000920120|SCV001812635|SCV002762839|SCV004209775|SCV004931388|SCV005918793
33333735	RAD51C	NM_058216.3	NM_058216.3:c.405-6T>A	-	splice_polypyrimidine_tract_variant	intron,splice_region	0.986	0	1	▼(E3p4); Δ(E3)	95.2%; 4.8%	-	-	-	-	complete		-	100	≥80	0.95	418442	criteria_provided,_conflicting_classifications	Conflicting_classifications_of_pathogenicity	Likely_pathogenic(1)|Uncertain_significance(2)	VUS	NO	SCV000565459|SCV001404415|SCV005899880
33333735	RAD51C	NM_058216.3	NM_058216.3:c.571+4A>G	-	splice_donor_region_variant	intron,splice_region	0.986	0.054	0.945	Δ(E3); ▼(E3q4)	76.5%; 11.6%	Δ(E3q114)	0.04	808-nt; 774-nt	1.4%; 1.1%	high		-	93.1	≥80	0.47	128207	criteria_provided,_conflicting_classifications	Conflicting_classifications_of_pathogenicity	Likely_pathogenic(4)|Uncertain_significance(7)	VUS	NO	SCV000150085|SCV000185236|SCV000261422|SCV000266229|SCV000691250|SCV000839330|SCV002043689|SCV004029807|SCV004207955|SCV005431501|SCV006090694
33333735	RAD51C	NM_058216.3	NM_058216.3:c.571+5G>A	-	splice_donor_region_variant	intron,splice_region	0.986	0	1	Δ(E3)	0.915	Δ(E3q114)	0.048	808-nt; 917-nt; 774-nt	1.6%; 1.1%; 1.0%	complete		-	96.3	≥80	0.93	216805	criteria_provided,_conflicting_classifications	Conflicting_classifications_of_pathogenicity	Pathogenic(1)|Likely_pathogenic(6)|Uncertain_significance(4)	P/LP	YES	SCV000255190|SCV000598657|SCV000663769|SCV000691251|SCV005416754|SCV005422733|SCV005623327|SCV005897450|SCV005911567|SCV005918799|SCV006324397
33333735	RAD51C	NM_058216.3	NM_058216.3:c.572-1G>T	-	splice_acceptor_variant	intron,splice_acceptor	0.986	0	1	Δ(E4)	0.934	-	-	1005-nt; 1058-nt	3.3%; 3.3%	complete		-	93.4	≥80	0.99	1098899	criteria_provided,_multiple_submitters,_no_conflicts	Likely_pathogenic	NA	LP	YES	SCV001623533|SCV004239991
33333735	RAD51C	NM_058216.3	NM_058216.3:c.705G>T	NP_478123.1:p.Lys235Asn	missense_variant,splice_region_variant	exon,splice_region	0.986	0	1	Δ(E4)	1	-	-	-	-	complete		-	100	≥80	0.87	216807	criteria_provided,_conflicting_classifications	Conflicting_classifications_of_pathogenicity	Pathogenic(1)|Likely_pathogenic(5)|Uncertain_significance(3)	P/LP	NO	SCV000255192|SCV000274447|SCV000807176|SCV000888601|SCV000896643|SCV001805733|SCV002043692|SCV004931512|SCV006063236
33333735	RAD51C	NM_058216.3	NM_058216.3:c.706-2A>C	-	splice_acceptor_variant	intron,splice_acceptor	0.986	0	1	Δ(E5p10); Δ(E5p52)	91.4%; 1.8%	Δ(E5)	0.04	886-nt	0.028	complete		-	97.2	≥80	1	631112	criteria_provided,_multiple_submitters,_no_conflicts	Pathogenic/Likely_pathogenic	NA	P/LP	YES	SCV000912852|SCV001227987|SCV002661541|SCV002809891|SCV004932025
33333735	RAD51C	NM_058216.3	NM_058216.3:c.706-2A>G	-	splice_acceptor_variant	intron,splice_acceptor	0.986	0	1	Δ(E5p10)	0.335	Δ(E5)	0.654	972-nt	0.011	complete		-	98.9	≥80	1	128209	criteria_provided,_multiple_submitters,_no_conflicts	Pathogenic/Likely_pathogenic	NA	P/LP	YES	SCV000150087|SCV000186640|SCV000291240|SCV000536677|SCV000686377|SCV000893462|SCV001363654|SCV001428832|SCV001447217|SCV001501671|SCV002019631|SCV002030139|SCV002530006|SCV002762841|SCV004017745|SCV004107440|SCV004209762|SCV004242885|SCV005197321|SCV006109972|SCV006277602|SCV006307210
33333735	RAD51C	NM_058216.3	NM_058216.3:c.837+2T>C	-	splice_donor_variant	intron,splice_donor	0.986	0	1	Δ(E4_E5)	0.022	Δ(E5)	0.893	972-nt	0.085	complete		-	91.5	≥80	0.99	584960	criteria_provided,_multiple_submitters,_no_conflicts	Likely_pathogenic	NA	LP	YES	SCV000905428|SCV001140723|SCV002678731
33333735	RAD51C	NM_058216.3	NM_058216.3:c.905-2A>C	-	splice_acceptor_variant	intron,splice_acceptor	0.986	0	1	Δ(E7)	0.974	-	-	660-nt	0.026	complete		-	97.4	≥80	0.91	216132	criteria_provided,_multiple_submitters,_no_conflicts	Pathogenic/Likely_pathogenic	NA	P/LP	YES	SCV000253964|SCV000663751|SCV000686402|SCV001363648|SCV004170111|SCV004207953|SCV004811863|SCV004933389|SCV005912275
33333735	RAD51C	NM_058216.3	NM_058216.3:c.905-2_905-1del	-	splice_acceptor_variant	intron,splice_acceptor	0.986	0	1	Δ(E7)	1	-	-	-	-	complete		-	100	≥80	0.91	141768	criteria_provided,_multiple_submitters,_no_conflicts	Pathogenic/Likely_pathogenic	NA	P/LP	YES	SCV000185270|SCV000293781|SCV000650029|SCV000691288|SCV001251543|SCV001447799|SCV001499811|SCV002555807|SCV002580636|SCV003838372|SCV004019918|SCV004026865|SCV004207922|SCV005051132|SCV005328365|SCV005649744|SCV006052594|SCV006324555
33333735	RAD51C	NM_058216.3	NM_058216.3:c.965+5G>A	-	splice_donor_region_variant	intron,splice_region	0.986	0	1	Δ(E7)	1	-	-	-	-	complete		-	100	≥80	0.92	409841	criteria_provided,_multiple_submitters,_no_conflicts	Pathogenic/Likely_pathogenic	NA	P/LP	YES	SCV000550196|SCV000663788|SCV000686408|SCV005053957|SCV005896248
33333735	RAD51C	NM_058216.3	NM_058216.3:c.966-2A>G	-	splice_acceptor_variant	intron,splice_acceptor	0.986	0	1	Δ(E8)	0.867	▼(E8p3)	0.11	881-nt; 940-nt	1.2%; 1.1%	complete		▼(E8p3)	86.7	≥80	0.84	859251	criteria_provided,_single_submitter	Uncertain_significance	NA	VUS	NO	SCV001230273
33333735	RAD51C	NM_058216.3	NM_058216.3:c.1026+5_1026+7del	-	splice_donor_region_variant	intron,splice_region	0.986	0	1	Δ(E8); ▼(E8q41)	79.5%; 3.3%	Δ(E8q18)	0.138	881-nt; 778-nt	2%; 1.4%	complete		-	96.6	≥80	0.88	128201	criteria_provided,_multiple_submitters,_no_conflicts	Pathogenic/Likely_pathogenic	NA	P/LP	YES	SCV000150079|SCV000184030|SCV000255311|SCV000536678|SCV000691214|SCV000807165|SCV000886446|SCV001363657|SCV001447258|SCV002518958|SCV002531784|SCV002811477|SCV004017748|SCV004207913|SCV004220129|SCV005329948|SCV005874151|SCV005912282|SCV006052440|SCV006278000|SCV006324427
35740625	RAD51C	NM_058216.3	NM_058216.3:c.146-4_146-2del	-	splice_acceptor_variant,splice_polypyrimidine_tract_variant	intron,splice_acceptor	0.986	0	1	Δ(E2)	0.738	Δ(E2p3)	0.251	657nt	0.011	complete		Δ(E2p3)	73.8	≥50 & <80	0.93	482181	criteria_provided,_multiple_submitters,_no_conflicts	Likely_pathogenic	NA	LP	YES	SCV000667135|SCV002309177|SCV004207999
35740625	RAD51C	NM_058216.3	NM_058216.3:c.146-3C>G	-	splice_polypyrimidine_tract_variant	intron,splice_region	0.986	0	1	Δ(E2)	0.948	Δ(E2p3)	0.052	-	-	complete		Δ(E2p3)	94.8	≥80	0.81	484752	criteria_provided,_multiple_submitters,_no_conflicts	Uncertain_significance	NA	VUS	NO	SCV000671913|SCV001512586
35740625	RAD51C	NM_058216.3	NM_058216.3:c.404+2T>C	-	splice_donor_variant	intron,splice_donor	0.986	0	1	▼(E2q27); Δ(E2); Δ(E2q175)	77.2%; 16.7%; 4.7%	-	-	657 nt	0.014	complete		-	98.6	≥80	0.97	182835	criteria_provided,_multiple_submitters,_no_conflicts	Pathogenic/Likely_pathogenic	NA	P/LP	YES	SCV000211627|SCV000278163|SCV000550176|SCV000888597|SCV000893459|SCV002600453|SCV004209753|SCV004930745|SCV006061437
35740625	RAD51C	NM_058216.3	NM_058216.3:c.404+3A>G	-	splice_donor_region_variant	intron,splice_region	0.986	0.263	0.733	▼(E2q27); Δ(E2q175)	66.4%; 5.4%	-	-	657 nt	0.019	intermediate		-	71.8	≥50 & <80	0.61	409857	criteria_provided,_multiple_submitters,_no_conflicts	Uncertain_significance	NA	VUS	NO	SCV000550218|SCV000567788|SCV001470082|SCV002630115
35740625	RAD51C	NM_058216.3	NM_058216.3:c.405-1G>C	-	splice_acceptor_variant	intron,splice_acceptor	0.986	0	1	Δ(E3p7); Δ(E3)	48.9%; 48.2%	-	-	813 nt	0.029	complete		-	97.1	≥80	0.99	141823	criteria_provided,_multiple_submitters,_no_conflicts	Pathogenic/Likely_pathogenic	NA	P/LP	YES	SCV000185361|SCV000259320|SCV002584296|SCV002775985|SCV004019962|SCV004208013
35740625	RAD51C	NM_058216.3	NM_058216.3:c.571+1del	-	splice_donor_variant	intron,splice_donor	0.986	0	1	Δ(E3q1)	0.984	-	-	800 nt	0.016	complete		-	98.4	≥80	0.99	482176	criteria_provided,_multiple_submitters,_no_conflicts	Pathogenic/Likely_pathogenic	NA	P/LP	YES	SCV000667128|SCV000920124|SCV000953057|SCV002053449|SCV003842257|SCV004208021|SCV004930485|SCV005688839
35740625	RAD51C	NM_058216.3	NM_058216.3:c.572-3C>G	-	splice_polypyrimidine_tract_variant	intron,splice_region	0.986	0	1	Δ(E4)	0.947	-	-	1063 nt; 1008 nt	3.0%; 2.3%	complete		-	94.7	≥80	0.99	633386	criteria_provided,_conflicting_classifications	Conflicting_classifications_of_pathogenicity	Pathogenic(1)|Likely_pathogenic(1)|Uncertain_significance(3)	VUS	NO	SCV000920119|SCV000964430|SCV002010639|SCV002650197|SCV005627557
35740625	RAD51C	NM_058216.3	NM_058216.3:c.572-1G>C	-	splice_acceptor_variant	intron,splice_acceptor	0.986	0	1	Δ(E4)	0.938	-	-	1008 nt; 1063 nt; 976 nt	3.2%; 1.5%; 1.5%	complete		-	93.8	≥80	0.99	480497	criteria_provided,_multiple_submitters,_no_conflicts	Pathogenic/Likely_pathogenic	NA	P/LP	YES	SCV000663772|SCV000691254|SCV000882845|SCV001233368|SCV001370199|SCV002762840|SCV004208016|SCV004931720|SCV006277262
35740625	RAD51C	NM_058216.3	NM_058216.3:c.705+1G>A	-	splice_donor_variant	intron,splice_donor	0.986	0	1	Δ(E4)	1	-	-	-	-	complete		-	100	≥80	1	230577	criteria_provided,_multiple_submitters,_no_conflicts	Pathogenic/Likely_pathogenic	NA	P/LP	YES	SCV000274169|SCV000686373|SCV000770061|SCV002812633|SCV004931161|SCV006079848
35740625	RAD51C	NM_058216.3	NM_058216.3:c.705+3A>G	-	splice_donor_region_variant	intron,splice_region	0.986	0.213	0.784	Δ(E4)	0.787	-	-	-	-	intermediate		-	78.7	≥50 & <80	0.44	241775	criteria_provided,_multiple_submitters,_no_conflicts	Uncertain_significance	NA	VUS	NO	SCV000291238|SCV000671892|SCV000686374|SCV000822172|SCV000839332|SCV005053973|SCV006277809|SCV006338326
35740625	RAD51C	NM_058216.3	NM_058216.3:c.706-1G>T	-	splice_acceptor_variant	intron,splice_acceptor	0.986	0	1	Δ(E5p10)	1	-	-	-	-	complete		-	100	≥80	1	452310	criteria_provided,_multiple_submitters,_no_conflicts	Likely_pathogenic	NA	LP	YES	SCV000621107|SCV000671878|SCV004933314|SCV005053951
35740625	RAD51C	NM_058216.3	NM_058216.3:c.837+1G>T	-	splice_donor_variant	intron,splice_donor	0.986	0	1	-	-	Δ(E5)	0.953	976 nt	0.047	complete		-	95.3	≥80	1	241779	criteria_provided,_multiple_submitters,_no_conflicts	Pathogenic/Likely_pathogenic	NA	P/LP	YES	SCV000291249|SCV000570749|SCV004000892|SCV004019972|SCV004021269|SCV005649740
35740625	RAD51C	NM_058216.3	NM_058216.3:c.837+4_837+7del	-	splice_donor_region_variant	intron,splice_region	0.986	0	1	-	-	Δ(E5)	1	-	-	complete		-	100	≥80	1	128212	criteria_provided,_conflicting_classifications	Conflicting_classifications_of_pathogenicity	Pathogenic(1)|Likely_pathogenic(3)|Uncertain_significance(1)	P/LP	YES	SCV000150090|SCV000273797|SCV000825126|SCV004357130|SCV005899043
35740625	RAD51C	NM_058216.3	NM_058216.3:c.838-2A>G	-	splice_acceptor_variant	intron,splice_acceptor	0.986	0	1	Δ(E6)	0.984	-	-	590 nt	0.016	complete		-	98.4	≥80	0.97	480508	criteria_provided,_multiple_submitters,_no_conflicts	Likely_pathogenic	NA	LP	YES	SCV000663789|SCV000770056|SCV002538904|SCV004208038|SCV004931055
35740625	RAD51C	NM_058216.3	NM_058216.3:c.904G>A	NP_478123.1:p.Gly302Arg	missense_variant,splice_region_variant	exon,splice_region	0.986	0.024	0.976	▼(E6q4)	0.976	-	-	-	-	high		-	97.6	≥80	0.62	478781	criteria_provided,_conflicting_classifications	Conflicting_classifications_of_pathogenicity	Likely_pathogenic(2)|Uncertain_significance(3)	VUS	NO	SCV000660417|SCV000663767|SCV000839341|SCV000913007|SCV005897569
35740625	RAD51C	NM_058216.3	NM_058216.3:c.904+1G>T	-	splice_donor_variant	intron,splice_donor	0.986	0	1	▼(E6q4)	1	-	-	-	-	complete		-	100	≥80	0.98	480510	criteria_provided,_multiple_submitters,_no_conflicts	Likely_pathogenic	NA	LP	YES	SCV000663791|SCV001134793|SCV001211695|SCV002530030|SCV004208036|SCV004932560
35740625	RAD51C	NM_058216.3	NM_058216.3:c.905-3_906del	-	splice_acceptor_variant,coding_sequence_variant	exon,intron,splice_acceptor	0.986	0	1	Δ(E7)	1	-	-	-	-	complete		-	100	≥80	0.91	182846	criteria_provided,_multiple_submitters,_no_conflicts	Pathogenic/Likely_pathogenic	NA	P/LP	YES	SCV000211642|SCV000671917|SCV000830316|SCV004208058|SCV004931482
35740625	RAD51C	NM_058216.3	NM_058216.3:c.905-2del	-	splice_acceptor_variant	intron,splice_acceptor	0.986	0	1	Δ(E7)	1	-	-	-	-	complete		-	100	≥80	0.91	230587	criteria_provided,_multiple_submitters,_no_conflicts	Pathogenic/Likely_pathogenic	NA	P/LP	YES	SCV000274184|SCV000291253|SCV001358584|SCV002551144|SCV004145756|SCV004933279|SCV005333428|SCV005689565
35740625	RAD51C	NM_058216.3	NM_058216.3:c.965+1G>A	-	splice_donor_variant	intron,splice_donor	0.986	0	1	Δ(E7)	1	-	-	-	-	complete		-	100	≥80	0.94	182838	criteria_provided,_multiple_submitters,_no_conflicts	Pathogenic/Likely_pathogenic	NA	P/LP	YES	SCV000211630|SCV000827290|SCV001348696|SCV002694201|SCV004208063|SCV004932354|SCV006276329
35740625	RAD51C	NM_058216.3	NM_058216.3:c.966-1G>C	-	splice_acceptor_variant	intron,splice_acceptor	0.986	0	1	Δ(E8)	0.206	▼(E8p3)	0.794	-	-	complete		▼(E8p3)	20.6	>20 & <50	0.84	851327	criteria_provided,_multiple_submitters,_no_conflicts	Uncertain_significance	NA	VUS	NO	SCV001220104|SCV001519432|SCV002694213|SCV004220158
34200360	RAD51D	NM_002878.4	NM_002878.4:c.83-2A>G	-	splice_acceptor_variant	intron,splice_acceptor	0.578	0	1	∆(E2_E5); ∆(E2); ∆(E2_E3)	41.9%; 39.6%; 9.6%	-	-	487-nt	0.09	complete	PTC: 13.8% ∆(E4_E5); 9.9% ∆(E3_E7); 5.2% ∆(E2_E5); IF: 13.3% ∆(E3_E5)	-	91.1	≥80	0.97	835734	criteria_provided,_conflicting_classifications	Conflicting_classifications_of_pathogenicity	Likely_pathogenic(1)|Uncertain_significance(1)	VUS	NO	SCV001200061|SCV004096114
34200360	RAD51D	NM_002878.4	NM_002878.4:c.83-4_83-3delinsAG	-	splice_polypyrimidine_tract_variant	intron,splice_region	0.578	0	1	▼(E2p2); ∆(E2_E5); ∆(E2)	54.2%; 38.6%; 7.2%	-	-	-	-	complete	PTC: 13.8% ∆(E4_E5); 9.9% ∆(E3_E7); 5.2% ∆(E2_E5); IF: 13.3% ∆(E3_E5)	-	100	≥80	0.93	926681	criteria_provided,_multiple_submitters,_no_conflicts	Uncertain_significance	NA	VUS	NO	SCV001356747|SCV001567911|SCV002675333|SCV004200446
34200360	RAD51D	NM_002878.4	NM_002878.4:c.145-2A>G	-	splice_acceptor_variant	intron,splice_acceptor	0.731	0	1	∆(E3)	0.555	∆(E3_E5)	0.445	-	-	complete	PTC: 9.4% ∆(E4_E5); IF: 17.5% ∆(E3_E5)	-	100	≥80	0.95	1477070	criteria_provided,_multiple_submitters,_no_conflicts	Likely_pathogenic	NA	LP	YES	SCV002260889|SCV004043853
34200360	RAD51D	NM_002878.4	NM_002878.4:c.343C>T	NP_002869.3:p.Gln115Ter	stop_gained,splice_region_variant	exon,splice_region	0.731	0.034	0.953	∆(E4); ∆(E4_E5)	45.7%; 28.1%	∆(E3_E5)	0.227	-	-	high	PTC: 9.4% ∆(E4_E5); IF: 17.5% ∆(E3_E5)	-	96.5	N/A (stop gained)	0.75	472599	criteria_provided,_multiple_submitters,_no_conflicts	Pathogenic	NA	P	NO	SCV000651733|SCV000912973|SCV002534798|SCV002615197|SCV004933231
34200360	RAD51D	NM_002878.4	NM_002878.4:c.345+2T>C	-	splice_donor_variant	intron,splice_donor	0.731	0	1	∆(E4); ∆(E4_E5)	49.6%; 26.4%	∆(E3_E5)	0.24	-	-	complete	PTC: 9.4% ∆(E4_E5); IF: 17.5% ∆(E3_E5)	-	100	≥80	0.92	231839	criteria_provided,_conflicting_classifications	Conflicting_classifications_of_pathogenicity	Likely_pathogenic(4)|Uncertain_significance(1)	LP	YES	SCV000275808|SCV000287705|SCV001772738|SCV004933060|SCV005053995
34200360	RAD51D	NM_002878.4	NM_002878.4:c.480+1G>A	-	splice_donor_variant	intron,splice_donor	0.731	0	1	∆(E4_E5)	0.292	∆(E3_E5); ∆(E5)	41.2%; 29.6%	-	-	complete	PTC: 9.4% ∆(E4_E5); IF: 17.5% ∆(E3_E5)	-	100	≥80	0.98	30286	criteria_provided,_conflicting_classifications	Conflicting_classifications_of_pathogenicity	Likely_pathogenic(2)|Uncertain_significance(1)	LP	YES	SCV002296792|SCV002636410|SCV004357163
34200360	RAD51D	NM_002878.4	NM_002878.4:c.577-2A>G	-	splice_acceptor_variant	intron,splice_acceptor	0.731	0	1	▼(E7p41); ∆(E7)	65.5%; 14.3%	∆(E6_E9)	0.202	-	-	complete	PTC: 9.4% ∆(E4_E5); IF: 17.5% ∆(E3_E5)	-	100	≥80	0.99	482184	criteria_provided,_multiple_submitters,_no_conflicts	Pathogenic/Likely_pathogenic	NA	P/LP	YES	SCV000667145|SCV000889828|SCV001205046|SCV001353496|SCV001360604|SCV004200422|SCV004932977|SCV005373329
34200360	RAD51D	NM_002878.4	NM_002878.4:c.738+1G>A	-	splice_donor_variant	intron,splice_donor	0.731	0	1	▼(E8q43); ∆(E8); ∆(E4_E7)	27.9%; 51.1%; 10.9%	-	-	1363-nt	0.101	complete	PTC: 9.4% ∆(E4_E5); IF: 17.5% ∆(E3_E5)	-	89.9	≥80	0.95	580022	criteria_provided,_multiple_submitters,_no_conflicts	Pathogenic/Likely_pathogenic	NA	P/LP	YES	SCV000832343|SCV001188717|SCV004930447|SCV005872521
34846068	PALB2	NM_024675.4	NM_024675.4:c.47A>G	NP_078951.2:p.Lys16Arg	missense_variant,splice_region_variant	exon,splice_region	1	0	1	∆(E1q17)	1	-	-	-	-	complete		-	100	≥80	0.92	422035	criteria_provided,_multiple_submitters,_no_conflicts	Uncertain_significance	NA	VUS	NO	SCV000571394|SCV000690933|SCV002634466|SCV004667578
34846068	PALB2	NM_024675.4	NM_024675.4:c.48G>A	NP_078951.2:p.Lys16=	splice_region_variant,synonymous_variant	exon,splice_region	1	0.009	0.991	∆(E1q17); ▼(I1-mg)	88.6%; 5%	▼(E1q9)	0.054	-	-	high		-	99	≥80	0.94	143978	criteria_provided,_multiple_submitters,_no_conflicts	Pathogenic/Likely_pathogenic	NA	P/LP	YES	SCV000665419|SCV001229787|SCV001354215|SCV001499698|SCV004188435|SCV005415956
34846068	PALB2	NM_024675.4	NM_024675.4:c.48+1G>A	-	splice_donor_variant	intron,splice_donor	1	0	1	∆(E1q17); ▼(I1-mg)	77.0%; 13.8%	▼(E1q9)	0.092	-	-	complete		-	100	≥80	0.94	482019	criteria_provided,_multiple_submitters,_no_conflicts	Likely_pathogenic	NA	LP	YES	SCV000666892|SCV000757066|SCV000821760|SCV000913014|SCV004188441
34846068	PALB2	NM_024675.4	NM_024675.4:c.48+4C>T	-	splice_donor_region_variant	intron,splice_region	1	0.945	0.055	∆(E1q17)	0.055	-	-	-	-	low		-	5.5	≤20	0.14	232567	criteria_provided,_multiple_submitters,_no_conflicts	Uncertain_significance	NA	VUS	NO	SCV000276731|SCV000757161|SCV004358009
34846068	PALB2	NM_024675.4	NM_024675.4:c.48+7G>C	-	intron_variant	intron	1	1	0	-	-	-	-	-	-	no aberration		-	0	≤20	0.37	241568	criteria_provided,_conflicting_classifications	Conflicting_classifications_of_pathogenicity	Uncertain_significance(2)|Benign(2)|Likely_benign(3)	B/LB	YES	SCV000290884|SCV000521737|SCV000686061|SCV000699605|SCV002531201|SCV002551698|SCV004019134
34846068	PALB2	NM_024675.4	NM_024675.4:c.49-2A>T	-	splice_acceptor_variant	intron,splice_acceptor	1	0	1	-	-	∆(E2p6)	1	-	-	complete		-	100	≥80	0.97	186820	reviewed_by_expert_panel	Uncertain_significance	NA	VUS	NO	SCV003915571
34846068	PALB2	NM_024675.4	NM_024675.4:c.108+1G>A	-	splice_donor_variant	intron,splice_donor	1	0	1	-	-	∆(E2)	1	-	-	complete		-	100	≥80	0.98	402289	criteria_provided,_multiple_submitters,_no_conflicts	Pathogenic/Likely_pathogenic	NA	P/LP	YES	SCV000538136|SCV000550808|SCV000572490|SCV000685845|SCV001140067|SCV001334809|SCV001434974|SCV004019178|SCV004222255|SCV005331567|SCV005901760
34846068	PALB2	NM_024675.4	NM_024675.4:c.108+2T>C	-	splice_donor_variant	intron,splice_donor	1	0.855	0.145	-	-	∆(E2)	0.145	-	-	low		-	14.5	≤20	0.31	995903	criteria_provided,_single_submitter	Likely_pathogenic	NA	LP	NO - excluded: PVS1_N/A in PALB2 Criteria Specification v1.2 (HBOP VCEP)	SCV001478141
34846068	PALB2	NM_024675.4	NM_024675.4:c.109-6_109-4del	-	splice_polypyrimidine_tract_variant	intron,splice_region	1	1	0	-	-	-	-	-	-	no aberration		-	0	≤20	0.07	630449	criteria_provided,_multiple_submitters,_no_conflicts	Likely_benign	NA	LB	YES	SCV000910302|SCV000933149|SCV002530585
34846068	PALB2	NM_024675.4	NM_024675.4:c.109-2A>G	-	splice_acceptor_variant	intron,splice_acceptor	1	0	1	∆(E3); ∆(E3p11)	41%; 59%	-	-	-	-	complete		-	100	≥80	1	182778	criteria_provided,_multiple_submitters,_no_conflicts	Pathogenic/Likely_pathogenic	NA	P/LP	YES	SCV000211539|SCV000670624|SCV000942919|SCV001500072|SCV004188416|SCV005623167|SCV005646508|SCV006061591|SCV006277766
34846068	PALB2	NM_024675.4	NM_024675.4:c.211+1G>A	-	splice_donor_variant	intron,splice_donor	1	0	1	∆(E3)	0.457	▼(E3q48)	0.543	-	-	complete		▼(E3q48)	45.7	>20 & <50	1	492177	criteria_provided,_multiple_submitters,_no_conflicts	Likely_pathogenic	NA	LP	YES	SCV000690828|SCV001140064|SCV001175177|SCV001203004|SCV002762301|SCV005053898|SCV005898588|SCV005913205
34846068	PALB2	NM_024675.4	NM_024675.4:c.211+5del	-	splice_donor_region_variant	intron,splice_region	1	1	0	-	-	-	-	-	-	no aberration		-	0	≤20	0.03	919857	criteria_provided,_conflicting_classifications	Conflicting_classifications_of_pathogenicity	Uncertain_significance(3)|Likely_benign(1)	VUS	NO	SCV001342661|SCV002285354|SCV004242702|SCV006127632
34846068	PALB2	NM_024675.4	NM_024675.4:c.1684+4A>G	-	splice_donor_region_variant	intron,splice_region	1	0.417	0.583	-	-	∆(E4)	0.583	-	-	intermediate		-	58.3	≥50 & <80	0.39	2770036	criteria_provided,_single_submitter	Uncertain_significance	NA	VUS	NO	SCV004334730
34846068	PALB2	NM_024675.4	NM_024675.4:c.1685-2A>C	-	splice_acceptor_variant	intron,splice_acceptor	1	0	1	∆(E5p139); ∆(E5p5); ▼(E5p88); ∆(E5p10); ∆(E5p97)	67.0%; 15.4%; 6.3%; 5.7%; 5.5%	-	-	-	-	complete		-	100	≥80	0.99	1042118	criteria_provided,_conflicting_classifications	Conflicting_classifications_of_pathogenicity	Likely_pathogenic(1)|Uncertain_significance(1)	VUS	NO	SCV001540180|SCV002715307
34846068	PALB2	NM_024675.4	NM_024675.4:c.1685-2A>G	-	splice_acceptor_variant	intron,splice_acceptor	1	0	1	∆(E5p139); ▼(E5p88); ∆(E5p10); ∆(E5p97); ∆(E5p5)	73.3%; 8.8%; 7.3%; 6.7%; 4.0%	-	-	-	-	complete		-	100	≥80	0.99	449968	criteria_provided,_multiple_submitters,_no_conflicts	Likely_pathogenic	NA	LP	YES	SCV000618466|SCV000665096|SCV001201271|SCV004110066|SCV004188417|SCV006079773
34846068	PALB2	NM_024675.4	NM_024675.4:c.2515-2A>G	-	splice_acceptor_variant	intron,splice_acceptor	1	0	1	▼(I5)	1	-	-	-	-	complete		-	100	≥80	0.97	4082273	criteria_provided,_single_submitter	Likely_pathogenic	NA	LP	YES	SCV006324414
34846068	PALB2	NM_024675.4	NM_024675.4:c.2586+4A>T	-	splice_donor_region_variant	intron,splice_region	1	1	0	-	-	-	-	-	-	no aberration		-	0	≤20	0.21	927993	criteria_provided,_single_submitter	Uncertain_significance	NA	VUS	NO	SCV001359482
34846068	PALB2	NM_024675.4	NM_024675.4:c.2587-2A>G	-	splice_acceptor_variant	intron,splice_acceptor	1	0	1	∆(E7p10)	1	-	-	-	-	complete		-	100	≥80	0.68	1513849	criteria_provided,_conflicting_classifications	Conflicting_classifications_of_pathogenicity	Likely_pathogenic(1)|Uncertain_significance(1)	VUS	NO	SCV002304991|SCV004188457
34846068	PALB2	NM_024675.4	NM_024675.4:c.2748+1G>T	-	splice_donor_variant	intron,splice_donor	1	0	1	-	-	∆(E7)	1	-	-	complete		-	100	≥80	0.73	186035	criteria_provided,_multiple_submitters,_no_conflicts	Pathogenic/Likely_pathogenic	NA	P/LP	YES	SCV000216287|SCV000567121|SCV000757190|SCV000840035|SCV001339502|SCV002551652|SCV004026389|SCV004188445|SCV004202185|SCV005197077|SCV005689556
34846068	PALB2	NM_024675.4	NM_024675.4:c.2748+2dup	-	splice_donor_variant	intron,splice_donor	1	0	1	-	-	∆(E7)	0.837	592‐nt; 710‐nt	8.9%; 7.4%	complete		-	83.7	≥80	0.72	647264	criteria_provided,_conflicting_classifications	Conflicting_classifications_of_pathogenicity	Likely_pathogenic(2)|Uncertain_significance(1)	LP	YES	SCV000941530|SCV002748966|SCV005623252
34846068	PALB2	NM_024675.4	NM_024675.4:c.2749-1G>T	-	splice_acceptor_variant	intron,splice_acceptor	1	0	1	∆(E8p7)	0.969	∆(E8p15)	0.031	-	-	complete		-	100	≥80	0.97	492198	criteria_provided,_multiple_submitters,_no_conflicts	Likely_pathogenic	NA	LP	YES	SCV000690871|SCV000965154|SCV004018156|SCV006047894
34846068	PALB2	NM_024675.4	NM_024675.4:c.2750T>C	NP_078951.2:p.Val917Ala	missense_variant	exon	1	1	0	-	-	-	-	-	-	no aberration		-	0	≤20	0.09	231633	criteria_provided,_multiple_submitters,_no_conflicts	Uncertain_significance	NA	VUS	NO	SCV000275539|SCV000633373|SCV000690872|SCV004202158
34846068	PALB2	NM_024675.4	NM_024675.4:c.2834G>C	NP_078951.2:p.Arg945Thr	missense_variant,splice_region_variant	exon,splice_region	1	0.9	0.1	∆(E8); ▼(E8q69)	7.8%; 2.2%	-	-	-	-	low		-	10	≤20	0.57	860213	criteria_provided,_single_submitter	Uncertain_significance	NA	VUS	NO	SCV001231494
34846068	PALB2	NM_024675.4	NM_024675.4:c.2834+1G>A	-	splice_donor_variant	intron,splice_donor	1	0	1	∆(E8); ▼(E8q69)	82.1%; 17.9%	-	-	-	-	complete		-	100	≥80	0.98	182771	criteria_provided,_multiple_submitters,_no_conflicts	Pathogenic/Likely_pathogenic	NA	P/LP	YES	SCV000211523|SCV000757388|SCV001177716|SCV001334140|SCV001348384|SCV001446557|SCV002044425|SCV002786871|SCV004188413
34846068	PALB2	NM_024675.4	NM_024675.4:c.2834+3A>G	-	splice_donor_region_variant	intron,splice_region	1	0.802	0.198	∆(E8)	0.198	-	-	-	-	low		-	19.8	≤20	0.43	410155	criteria_provided,_conflicting_classifications	Conflicting_classifications_of_pathogenicity	Uncertain_significance(1)|Likely_benign(1)	VUS	NO	SCV000550692|SCV001177718
34846068	PALB2	NM_024675.4	NM_024675.4:c.2834+5G>A	-	splice_donor_region_variant	intron,splice_region	1	0.407	0.593	∆(E8)	0.593	-	-	-	-	intermediate		-	59.3	≥50 & <80	0.76	530057	criteria_provided,_conflicting_classifications	Conflicting_classifications_of_pathogenicity	Uncertain_significance(3)|Likely_benign(1)	VUS	NO	SCV000757079|SCV001177719|SCV001354181|SCV005053885
34846068	PALB2	NM_024675.4	NM_024675.4:c.2834+6T>C	-	splice_donor_region_variant	intron,splice_region	1	1	0	-	-	-	-	-	-	no aberration		-	0	≤20	0.17	3727724	criteria_provided,_single_submitter	Uncertain_significance	NA	VUS	NO	SCV005843216
34846068	PALB2	NM_024675.4	NM_024675.4:c.2996+4A>G	-	splice_donor_region_variant	intron,splice_region	1	0.129	0.871	-	-	∆(E9)	0.871	-	-	high		-	87.1	≥80	0.6	2687484	criteria_provided,_single_submitter	Uncertain_significance	NA	VUS	NO	SCV004231844
34846068	PALB2	NM_024675.4	NM_024675.4:c.2997-1G>A	-	splice_acceptor_variant	intron,splice_acceptor	1	0	1	∆(E10p2)	0.958	-	-	-	-	complete		-	95.8	≥80	0.99	822478	criteria_provided,_conflicting_classifications	Conflicting_classifications_of_pathogenicity	Likely_pathogenic(3)|Uncertain_significance(1)	LP	YES	SCV001179025|SCV001339495|SCV004188426|SCV004245747
34846068	PALB2	NM_024675.4	NM_024675.4:c.3113G>A	NP_078951.2:p.Trp1038Ter	stop_gained,splice_region_variant	exon,splice_region	1	0.105	0.895	∆(E10q31); ∆(E10q41)	52.9%; 2.2%	∆(E10); ∆(E9_E10)	28.1%; 6.3%	-	-	high		-	89.5	N/A (stop gained)	0.74	126711	reviewed_by_expert_panel	Pathogenic	NA	P	NO	SCV003915565
34846068	PALB2	NM_024675.4	NM_024675.4:c.3113+5G>C	-	splice_donor_region_variant	intron,splice_region	1	0.049	0.951	∆(E10q31); ∆(E10q41); ∆(E10q65)	90.0%; 2.8%; 2.3%	-	-	-	-	high		-	95.1	≥80	0.47	231961	criteria_provided,_multiple_submitters,_no_conflicts	Pathogenic/Likely_pathogenic	NA	P/LP	YES	SCV000275968|SCV000290864|SCV000322190|SCV000903684|SCV004043219|SCV004202009|SCV005623211|SCV005646462|SCV005877723|SCV006083518
34846068	PALB2	NM_024675.4	NM_024675.4:c.3201+1G>A	-	splice_donor_variant	intron,splice_donor	1	0	1	∆(E11)	1	-	-	-	-	complete		-	100	≥80	0.96	2673833	criteria_provided,_multiple_submitters,_no_conflicts	Pathogenic/Likely_pathogenic	NA	P/LP	YES	SCV004188447|SCV005461081|SCV005759369
34846068	PALB2	NM_024675.4	NM_024675.4:c.3201+6T>A	-	splice_donor_region_variant	intron,splice_region	1	0.115	0.885	∆(E11)	0.885	-	-	-	-	high		-	88.5	≥80	0.32	628207	criteria_provided,_multiple_submitters,_no_conflicts	Uncertain_significance	NA	VUS	NO	SCV000905730|SCV001204941|SCV001813989
34846068	PALB2	NM_024675.4	NM_024675.4:c.3348C>T	NP_078951.2:p.Gly1116=	splice_region_variant,synonymous_variant	exon,splice_region	1	0.68	0.32	∆(E12q4); ∆(E12)	26.7%; 5.3%	-	-	-	-	intermediate		-	32	>20 & <50	0.32	1050999	criteria_provided,_multiple_submitters,_no_conflicts	Uncertain_significance	NA	VUS	NO	SCV001554838|SCV004057652|SCV006062117
34846068	PALB2	NM_024675.4	NM_024675.4:c.3350+4A>G	-	splice_donor_region_variant	intron,splice_region	1	0	1	▼(E12q4); ∆(E12)	56.1%; 43.9%	-	-	-	-	complete		-	100	≥80	0.39	126737	reviewed_by_expert_panel	Likely_pathogenic	NA	LP	YES	SCV003915566
34846068	PALB2	NM_024675.4	NM_024675.4:c.3350+5G>A	-	splice_donor_region_variant	intron,splice_region	1	0	1	∆(E12)	1	-	-	-	-	complete		-	100	≥80	0.44	142586	criteria_provided,_multiple_submitters,_no_conflicts	Pathogenic/Likely_pathogenic	NA	P/LP	YES	SCV000186838|SCV000633424|SCV000838994|SCV001358405|SCV002074502|SCV002531173|SCV004043220|SCV004202110|SCV005417798|SCV005623228|SCV005909261|SCV005913276|SCV006060036
36139699	PALB2	NM_024675.4	NM_024675.4:c.46A>G	NP_078951.2:p.Lys16Glu	missense_variant,splice_region_variant	exon,splice_region	1	0.925	0.075	∆(E1q17)	0.075	-	-	-	-	low		-	7.5	≤20	0.27	873421	no_assertion_criteria_provided	Benign	NA	B	YES	SCV001251343
36139699	PALB2	NM_024675.4	NM_024675.4:c.48+1del	-	splice_donor_variant	intron,splice_donor	1	0	1	∆(E1q17)	1	-	-	-	-	complete		-	100	≥80	0.94	402309	criteria_provided,_single_submitter	Likely_pathogenic	NA	LP	YES	SCV000538175
36139699	PALB2	NM_024675.4	NM_024675.4:c.48+1G>C	-	splice_donor_variant	intron,splice_donor	1	0	1	∆(E1q17)	0.908	▼(E1q9)	0.092	-	-	complete		-	100	≥80	0.94	126750	criteria_provided,_conflicting_classifications	Conflicting_classifications_of_pathogenicity	Likely_pathogenic(2)|Uncertain_significance(1)	LP	YES	SCV000274677|SCV000293389|SCV004019437
36139699	PALB2	NM_024675.4	NM_024675.4:c.48+1G>T	-	splice_donor_variant	intron,splice_donor	1	0	1	∆(E1q17)	1	-	-	-	-	complete		-	100	≥80	0.94	871587	criteria_provided,_multiple_submitters,_no_conflicts	Pathogenic/Likely_pathogenic	NA	P/LP	YES	SCV001247813|SCV001575354|SCV004188437
36139699	PALB2	NM_024675.4	NM_024675.4:c.48+2T>G	-	splice_donor_variant	intron,splice_donor	1	0	1	∆(E1q17)	1	-	-	-	-	complete		-	100	≥80	0.94	232295	criteria_provided,_single_submitter	Likely_pathogenic	NA	LP	YES	SCV000276388
36139699	PALB2	NM_024675.4	NM_024675.4:c.48+5C>T	-	splice_donor_region_variant	intron,splice_region	1	1	0	-	-	-	-	-	-	no aberration		-	0	≤20	0.04	492225	criteria_provided,_multiple_submitters,_no_conflicts	Likely_benign	NA	LB	YES	SCV000690935|SCV001184901|SCV001419375
36139699	PALB2	NM_024675.4	NM_024675.4:c.49-2del	-	splice_acceptor_variant	intron,splice_acceptor	1	0	1	-	-	∆(E2p6)	1	-	-	complete		-	100	≥80	0.98	641037	criteria_provided,_multiple_submitters,_no_conflicts	Uncertain_significance	NA	VUS	NO	SCV000933577|SCV006127660
36139699	PALB2	NM_024675.4	NM_024675.4:c.49-1del	-	splice_acceptor_variant	intron,splice_acceptor	1	0	1	-	-	∆(E2p6)	1	-	-	complete		-	100	≥80	0.98	830084	no_assertion_criteria_provided	Pathogenic	NA	P	YES	SCV001192911|SCV002758454
36139699	PALB2	NM_024675.4	NM_024675.4:c.49-1G>A	-	splice_acceptor_variant	intron,splice_acceptor	1	0	1	-	-	∆(E2p6)	1	-	-	complete		-	100	≥80	0.98	584471	criteria_provided,_conflicting_classifications	Conflicting_classifications_of_pathogenicity	Likely_pathogenic(2)|Uncertain_significance(2)	VUS	NO	SCV000821761|SCV002646391|SCV004358008|SCV005832095
36139699	PALB2	NM_024675.4	NM_024675.4:c.108+1_108+2insC	-	splice_donor_variant	intron,splice_donor	1	0	1	-	-	∆(E2)	1	-	-	complete		-	100	≥80	0.99	818335	reviewed_by_expert_panel	Likely_pathogenic	NA	LP	YES	SCV003915548
36139699	PALB2	NM_024675.4	NM_024675.4:c.108+5G>A	-	splice_donor_region_variant	intron,splice_region	1	1	0	-	-	-	-	-	-	no aberration		-	0	≤20	0.16	568096	criteria_provided,_single_submitter	Likely_benign	NA	LB	YES	SCV000815948
36139699	PALB2	NM_024675.4	NM_024675.4:c.109-2A>C	-	splice_acceptor_variant	intron,splice_acceptor	1	0	1	∆(E3p11); ∆(E3)	85.0%; 15.0%	-	-	-	-	complete		-	100	≥80	1	822146	criteria_provided,_single_submitter	Likely_pathogenic	NA	LP	YES	SCV001178303
36139699	PALB2	NM_024675.4	NM_024675.4:c.210A>G	NP_078951.2:p.Ser70=	splice_region_variant,synonymous_variant	exon,splice_region	1	1	0	-	-	-	-	-	-	no aberration		-	0	≤20	0.25	482003	criteria_provided,_multiple_submitters,_no_conflicts	Likely_benign	NA	LB	YES	SCV000666849|SCV000818283
36139699	PALB2	NM_024675.4	NM_024675.4:c.210A>C	NP_078951.2:p.Ser70=	splice_region_variant,synonymous_variant	exon,splice_region	1	1	0	-	-	-	-	-	-	no aberration		-	0	≤20	0.28	186040	criteria_provided,_single_submitter	Likely_benign	NA	LB	YES	SCV000216295
36139699	PALB2	NM_024675.4	NM_024675.4:c.211+1G>T	-	splice_donor_variant	intron,splice_donor	1	0	1	∆(E3)	0.733	▼(E3q48)	0.267	-	-	complete		▼(E3q48)	73.3	≥50 & <80	1	650958	criteria_provided,_multiple_submitters,_no_conflicts	Pathogenic/Likely_pathogenic	NA	P/LP	YES	SCV000946204|SCV001480064|SCV002580543|SCV004242703|SCV005462834|SCV005689558|SCV005848146|SCV005895032
36139699	PALB2	NM_024675.4	NM_024675.4:c.211+2T>C	-	splice_donor_variant	intron,splice_donor	1	0	1	∆(E3)	0.481	▼(E3q48)	0.519	-	-	complete		▼(E3q48)	48.1	>20 & <50	0.99	835687	criteria_provided,_single_submitter	Likely_pathogenic	NA	LP	YES	SCV001200001
35716007	ATM	NM_000051.4	NM_000051.4:c.332-5A>G	-	splice_polypyrimidine_tract_variant	intron,splice_region	0.657	0.4	0.391	∆(E7); [▼(E5p4)∆(E7]; ∆(E5,E7)	36.7%; 16.9%; 6.4%	-	-	-	-	intermediate	PTC: 34% ∆(E7)	-	60	≥50 & <80	0.4	3722730	criteria_provided,_single_submitter	Uncertain_significance	NA	VUS	NO	SCV005837575
35716007	ATM	NM_000051.4	NM_000051.4:c.332-1G>A	-	splice_acceptor_variant	intron,splice_acceptor	0.657	0	1	∆(E5,E7); ∆(E5p1)	36.6%; 19.8%	∆(E5)	0.436	-	-	complete	PTC: 34% ∆(E7)	-	100	≥80	0.93	231535	reviewed_by_expert_panel	Pathogenic	NA	P	YES	SCV002499301
35716007	ATM	NM_000051.4	NM_000051.4:c.496G>A	NP_000042.3:p.Glu166Lys	missense_variant,splice_region_variant	exon,splice_region	0.657	0.718	-0.093	∆(E7)	0.282	-	-	-	-	no aberration	PTC: 34% ∆(E7)	-	28.2	>20 & <50	0.66	825334	criteria_provided,_multiple_submitters,_no_conflicts	Uncertain_significance	NA	VUS	NO	SCV001185207|SCV001220596|SCV001342203
35716007	ATM	NM_000051.4	NM_000051.4:c.496+5G>A	-	splice_donor_region_variant	intron,splice_region	0.657	0.252	0.616	∆(E7); ∆(E5,E7)	5.7%; 33.0%	∆(E5)	0.361	-	-	intermediate	PTC: 34% ∆(E7)	-	74.8	≥50 & <80	0.82	3047	criteria_provided,_multiple_submitters,_no_conflicts	Pathogenic/Likely_pathogenic	NA	P/LP	YES	SCV000273575|SCV000293428|SCV000622549|SCV000687588|SCV001424016|SCV002579154|SCV004039500|SCV004207071|SCV005911182|SCV006079833
35716007	ATM	NM_000051.4	NM_000051.4:c.901+2T>C	-	splice_donor_variant	intron,splice_donor	0.657	0	1	∆(E7)	1	-	-	-	-	complete	PTC: 34% ∆(E7)	-	100	≥80	0.99	631172	criteria_provided,_multiple_submitters,_no_conflicts	Pathogenic/Likely_pathogenic	NA	P/LP	YES	SCV000913194|SCV002683497
35716007	ATM	NM_000051.4	NM_000051.4:c.901+3A>T	-	splice_donor_region_variant	intron,splice_region	0.657	0	1	∆(E7)	0.905	-	-	970-nt	0.095	complete	PTC: 34% ∆(E7)	-	90.5	≥80	0.73	186593	criteria_provided,_conflicting_classifications	Conflicting_classifications_of_pathogenicity	Likely_pathogenic(1)|Uncertain_significance(2)	VUS	NO	SCV000216990|SCV000913536|SCV004296141
35716007	ATM	NM_000051.4	NM_000051.4:c.902-1G>T	-	splice_acceptor_variant	intron,splice_acceptor	0.657	0	1	∆(E8); ∆(E7_E8)	37.4%; 62.6%	-	-	-	-	complete	PTC: 34% ∆(E7)	-	100	≥80	0.96	418911	criteria_provided,_multiple_submitters,_no_conflicts	Pathogenic	NA	P	YES	SCV000566311|SCV000581462|SCV000812959|SCV000911165|SCV002580857|SCV004010112|SCV004027780|SCV004212156|SCV004931542
35716007	ATM	NM_000051.4	NM_000051.4:c.902G>A	NP_000042.3:p.Gly301Asp	missense_variant,splice_region_variant	exon,splice_region	0.657	0.648	0.014	∆(E7); ∆(E7_E8)	22.6%; 12.6%	-	-	-	-	low	PTC: 34% ∆(E7)	-	35.2	>20 & <50	0.11	188359	criteria_provided,_conflicting_classifications	Conflicting_classifications_of_pathogenicity	Uncertain_significance(17)|Likely_benign(1)	VUS	NO	SCV000219085|SCV000273019|SCV000564611|SCV000692730|SCV000743719|SCV000805636|SCV000903251|SCV001263697|SCV002010773|SCV002068092|SCV002530669|SCV002572471|SCV002579656|SCV002789636|SCV004207039|SCV005624183|SCV005872589|SCV006094688
35716007	ATM	NM_000051.4	NM_000051.4:c.903T>G	NP_000042.3:p.Gly301=	synonymous_variant	exon	0.657	0.615	0.064	∆(E7); ∆(E7_E8)	21.3%; 17.2%	-	-	-	-	low	PTC: 34% ∆(E7)	-	38.5	>20 & <50	0.19	231747	criteria_provided,_multiple_submitters,_no_conflicts	Benign/Likely_benign	NA	B/LB	YES	SCV000275690|SCV000622879|SCV000906678|SCV005085080|SCV005880752
35716007	ATM	NM_000051.4	NM_000051.4:c.1065+1G>T	-	splice_donor_variant	intron,splice_donor	0.657	0	1	▼(E8q5); [∆(E7)▼(E8q5)]	54.8%; 45.2%	-	-	-	-	complete	PTC: 34% ∆(E7)	-	100	≥80	0.97	186470	criteria_provided,_multiple_submitters,_no_conflicts	Pathogenic/Likely_pathogenic	NA	P/LP	YES	SCV000216833|SCV000517272|SCV000537619|SCV000547061|SCV000781078|SCV000838481|SCV001623371|SCV002059549|SCV004209518|SCV004931000|SCV005904217|SCV006056771
35716007	ATM	NM_000051.4	NM_000051.4:c.1065+3A>G	-	splice_donor_region_variant	intron,splice_region	0.657	0.253	0.615	∆(E7); [∆(E7)▼(E8q5)]; ∆(E7_E8); ∆(E8); ▼(E8q5)	5.7%; 8.9%; 28.8%; 6.1%; 25.2%	-	-	-	-	intermediate	PTC: 34% ∆(E7)	-	74.7	≥50 & <80	0.38	482696	criteria_provided,_multiple_submitters,_no_conflicts	Uncertain_significance	NA	VUS	NO	SCV000668073|SCV002931676
35716007	ATM	NM_000051.4	NM_000051.4:c.1066-6T>G	-	splice_polypyrimidine_tract_variant	intron,splice_region	0.657	0.267	0.594	∆(E9); ∆(E7,E9); ∆(E7)	44.8%; 14.9%; 3.3%	∆(E7_E9)	0.103	-	-	intermediate	PTC: 34% ∆(E7)	-	73.3	≥50 & <80	0.63	3038	reviewed_by_expert_panel	Benign	NA	B	YES	SCV002499287
35716007	ATM	NM_000051.4	NM_000051.4:c.1235+4_1235+5del	-	splice_donor_region_variant	intron,splice_region	0.657	0.451	0.314	∆(E9); ∆(E7,E9); ∆(E7)	19.4%; 11.3%; 12.8%	∆(E7_E9)	0.114	-	-	intermediate	PTC: 34% ∆(E7)	-	54.9	≥50 & <80	0.7	419780	criteria_provided,_conflicting_classifications	Conflicting_classifications_of_pathogenicity	Pathogenic(1)|Likely_pathogenic(2)|Uncertain_significance(5)	VUS	NO	SCV000567832|SCV000665551|SCV000945632|SCV001347295|SCV003929025|SCV004210241|SCV004230076|SCV004701910
35716007	ATM	NM_000051.4	NM_000051.4:c.1898G>T	NP_000042.3:p.Cys633Phe	missense_variant,splice_region_variant	exon,splice_region	0.841	0.626	0.256	-	-	∆(E12)	0.374	-	-	intermediate	IF: 16% ∆(E11)	-	37.4	>20 & <50	0.44	3966285	criteria_provided,_single_submitter	Uncertain_significance	NA	VUS	NO	SCV006172494
35716007	ATM	NM_000051.4	NM_000051.4:c.1898+2T>G	-	splice_donor_variant	intron,splice_donor	0.841	0.13	0.845	-	-	∆(E12)	0.87	-	-	high	IF: 16% ∆(E11)	-	87	≥80	1	141939	criteria_provided,_multiple_submitters,_no_conflicts	Pathogenic/Likely_pathogenic	NA	P/LP	YES	SCV000185548|SCV000293075|SCV000546808|SCV000682012|SCV000892002|SCV001447752|SCV004027167|SCV004027661|SCV004212228|SCV004931360|SCV006321962
35716007	ATM	NM_000051.4	NM_000051.4:c.1898+3_1898+4del	-	splice_donor_region_variant	intron,splice_region	0.841	0	1	-	-	∆(E12)	1	-	-	complete	IF: 16% ∆(E11)	-	100	≥80	0.99	246091	criteria_provided,_single_submitter	Uncertain_significance	NA	VUS	NO	SCV000293434
35716007	ATM	NM_000051.4	NM_000051.4:c.2251-1G>C	-	splice_acceptor_variant	intron,splice_acceptor	0.841	0	1	∆(E15p19)	0.574	∆(E15); ∆(E11,E15); ∆(E15_E16)	11.7%; 18.2%; 12.7%	-	-	complete	IF: 16% ∆(E11)	-	100	≥80	0.97	232343	criteria_provided,_multiple_submitters,_no_conflicts	Pathogenic/Likely_pathogenic	NA	P/LP	YES	SCV000276460|SCV000546952|SCV004932015
35716007	ATM	NM_000051.4	NM_000051.4:c.2376+1G>A	-	splice_donor_variant	intron,splice_donor	0.841	0	1	-	-	∆(E15); ∆(E11,E15)	81.3%; 18.7%	-	-	complete	IF: 16% ∆(E11)	-	100	≥80	0.96	490469	criteria_provided,_multiple_submitters,_no_conflicts	Pathogenic/Likely_pathogenic	NA	P/LP	YES	SCV000687380|SCV001396914|SCV004212252|SCV005168347|SCV005681237|SCV006552702
35716007	ATM	NM_000051.4	NM_000051.4:c.2376+3A>T	-	splice_donor_region_variant	intron,splice_region	0.841	0	1	-	-	∆(E15); ∆(E11,E15)	80.0%; 20.0%	-	-	complete	IF: 16% ∆(E11)	-	100	≥80	0.78	407513	criteria_provided,_conflicting_classifications	Conflicting_classifications_of_pathogenicity	Likely_pathogenic(1)|Uncertain_significance(2)	VUS	NO	SCV000546765|SCV002735060|SCV004358282
35716007	ATM	NM_000051.4	NM_000051.4:c.2377-6T>A	-	splice_polypyrimidine_tract_variant	intron,splice_region	0.841	0.833	0.01	-	-	∆(E11)	0.167	-	-	low	IF: 16% ∆(E11)	-	16.7	≤20	0.11	234263	criteria_provided,_conflicting_classifications	Conflicting_classifications_of_pathogenicity	Uncertain_significance(5)|Likely_benign(4)	VUS	NO	SCV000278815|SCV000547015|SCV000706976|SCV000903246|SCV002580969|SCV004702654|SCV005184337|SCV005887797|SCV005913656
35716007	ATM	NM_000051.4	NM_000051.4:c.2377-2A>G	-	splice_acceptor_variant	intron,splice_acceptor	0.841	0	1	-	-	∆(E16); ∆(E16p3); ∆(E11,E16)	45.2%; 38.7%; 16.1%	-	-	complete	IF: 16% ∆(E11)	∆(E16p3)	61.3	≥50 & <80	0.99	370519	criteria_provided,_conflicting_classifications	Conflicting_classifications_of_pathogenicity	Likely_pathogenic(3)|Uncertain_significance(2)	LP	YES	SCV000660467|SCV000910309|SCV001229353|SCV004207725|SCV005903098
35716007	ATM	NM_000051.4	NM_000051.4:c.2638+3A>G	-	splice_donor_region_variant	intron,splice_region	0.841	1	-0.189	-	-	-	-	-	-	no aberration	IF: 16% ∆(E11)	-	0	≤20	0.01	233657	criteria_provided,_conflicting_classifications	Conflicting_classifications_of_pathogenicity	Uncertain_significance(3)|Likely_benign(2)	VUS	NO	SCV000278079|SCV000517875|SCV000622342|SCV001353237|SCV002819242
35716007	ATM	NM_000051.4	NM_000051.4:c.3577-1G>A	-	splice_acceptor_variant	intron,splice_acceptor	1	0	1	∆(E25)	1	-	-	-	-	complete		-	100	≥80	0.99	1732833	criteria_provided,_single_submitter	Likely_pathogenic	NA	LP	YES	SCV002615642
35716007	ATM	NM_000051.4	NM_000051.4:c.3746+1G>A	-	splice_donor_variant	intron,splice_donor	1	0	1	∆(E25)	1	-	-	-	-	complete		-	100	≥80	0.98	1323601	criteria_provided,_multiple_submitters,_no_conflicts	Pathogenic/Likely_pathogenic	NA	P/LP	YES	SCV002020631|SCV006170796
35716007	ATM	NM_000051.4	NM_000051.4:c.3746+4A>C	-	splice_donor_region_variant	intron,splice_region	1	0.714	0.286	∆(E25)	0.286	-	-	-	-	intermediate		-	28.6	>20 & <50	0.08	507777	criteria_provided,_conflicting_classifications	Conflicting_classifications_of_pathogenicity	Uncertain_significance(2)|Likely_benign(2)	VUS	NO	SCV000716484|SCV000949321|SCV001714397|SCV002621242
35716007	ATM	NM_000051.4	NM_000051.4:c.3746+5G>A	-	splice_donor_region_variant	intron,splice_region	1	0	1	∆(E25)	1	-	-	-	-	complete		-	100	≥80	0.24	230159	criteria_provided,_conflicting_classifications	Conflicting_classifications_of_pathogenicity	Pathogenic(1)|Likely_pathogenic(1)|Uncertain_significance(2)	VUS	NO	SCV000273604|SCV000622450|SCV001356366|SCV004215520
35716007	ATM	NM_000051.4	NM_000051.4:c.3993G>A	NP_000042.3:p.Gln1331=	splice_region_variant,synonymous_variant	exon,splice_region	1	0	1	∆(E26)	0.271	∆(E26q120)	0.729	-	-	complete		-	100	≥80	0.68	216207	criteria_provided,_multiple_submitters,_no_conflicts	Uncertain_significance	NA	VUS	NO	SCV000254094|SCV005384716
35716007	ATM	NM_000051.4	NM_000051.4:c.3993+1G>A	-	splice_donor_variant	intron,splice_donor	1	0	1	∆(E26)	0.327	∆(E26q120)	0.673	-	-	complete		-	100	≥80	1	141447	criteria_provided,_multiple_submitters,_no_conflicts	Pathogenic/Likely_pathogenic	NA	P/LP	YES	SCV000184785|SCV000282950|SCV000515987|SCV000687508|SCV002767913|SCV004027217|SCV004212088|SCV005199608|SCV005725453|SCV006056791
35716007	ATM	NM_000051.4	NM_000051.4:c.3993+5G>T	-	splice_donor_region_variant	intron,splice_region	1	0.762	0.238	-	-	∆(E26q120)	0.238	-	-	intermediate		-	23.8	>20 & <50	0.18	136444	criteria_provided,_multiple_submitters,_no_conflicts	Benign/Likely_benign	NA	B/LB	YES	SCV000167087|SCV000172923|SCV000262384|SCV000593482|SCV000602569|SCV000682171|SCV000747795|SCV000805546|SCV000840936|SCV001469348|SCV002504707|SCV002536695|SCV004017236|SCV004184191|SCV004240624|SCV005083952|SCV005090281
35716007	ATM	NM_000051.4	NM_000051.4:c.3994-3C>T	-	splice_polypyrimidine_tract_variant	intron,splice_region	1	1	0	-	-	-	-	-	-	no aberration		-	0	≤20	0.09	3715594	criteria_provided,_single_submitter	Uncertain_significance	NA	VUS	NO	SCV005828224
35716007	ATM	NM_000051.4	NM_000051.4:c.3994-2A>G	-	splice_acceptor_variant	intron,splice_acceptor	1	0	1	∆(E27)	1	-	-	-	-	complete		-	100	≥80	0.99	142167	criteria_provided,_multiple_submitters,_no_conflicts	Pathogenic/Likely_pathogenic	NA	P/LP	YES	SCV000186065|SCV000253669|SCV000904688|SCV001817496|SCV004027220|SCV004203827|SCV004932092|SCV005199609
35716007	ATM	NM_000051.4	NM_000051.4:c.4109+1G>T	-	splice_donor_variant	intron,splice_donor	1	0	1	∆(E27); ∆(E27q1)	83.4%; 16.6%	-	-	-	-	complete		-	100	≥80	1	245985	criteria_provided,_multiple_submitters,_no_conflicts	Likely_pathogenic	NA	LP	YES	SCV000293242|SCV001575684|SCV002632447|SCV002762712|SCV004212193|SCV004933289|SCV005681278
35716007	ATM	NM_000051.4	NM_000051.4:c.4109+3A>G	-	splice_donor_region_variant	intron,splice_region	1	0.457	0.543	∆(E27)	0.543	-	-	-	-	intermediate		-	54.3	≥50 & <80	0.13	834178	criteria_provided,_multiple_submitters,_no_conflicts	Uncertain_significance	NA	VUS	NO	SCV001198111|SCV002631466
35716007	ATM	NM_000051.4	NM_000051.4:c.4109+5G>A	-	splice_donor_region_variant	intron,splice_region	1	0	1	∆(E27)	1	-	-	-	-	complete		-	100	≥80	0.83	838766	criteria_provided,_conflicting_classifications	Conflicting_classifications_of_pathogenicity	Likely_pathogenic(3)|Uncertain_significance(1)	LP	YES	SCV001203950|SCV002630637|SCV003919591|SCV005681279
35716007	ATM	NM_000051.4	NM_000051.4:c.4109+6T>G	-	splice_donor_region_variant	intron,splice_region	1	0.685	0.315	∆(E27)	0.315	-	-	-	-	intermediate		-	31.5	>20 & <50	0.11	453501	criteria_provided,_multiple_submitters,_no_conflicts	Uncertain_significance	NA	VUS	NO	SCV000622473|SCV000904350|SCV005057016
35716007	ATM	NM_000051.4	NM_000051.4:c.4110-9C>G	-	splice_polypyrimidine_tract_variant	intron,splice_region	1	0	1	∆(E28); ▼(E28p8)	15.2%; 84.8%	-	-	-	-	complete		-	100	≥80	0.91	407567	criteria_provided,_conflicting_classifications	Conflicting_classifications_of_pathogenicity	Pathogenic(1)|Likely_pathogenic(4)|Uncertain_significance(2)	P/LP	YES	SCV000546867|SCV000568321|SCV001183562|SCV001360384|SCV001911460|SCV004204468|SCV004932186
35716007	ATM	NM_000051.4	NM_000051.4:c.4236+1G>A	-	splice_donor_variant	intron,splice_donor	1	0	1	∆(E28)	1	-	-	-	-	complete		-	100	≥80	1	2033903	criteria_provided,_multiple_submitters,_no_conflicts	Pathogenic/Likely_pathogenic	NA	P/LP	YES	SCV003238057|SCV005057084|SCV006056796|SCV006062846
35716007	ATM	NM_000051.4	NM_000051.4:c.4236+5G>A	-	splice_donor_region_variant	intron,splice_region	1	0	1	∆(E28)	1	-	-	-	-	complete		-	100	≥80	0.98	577620	criteria_provided,_multiple_submitters,_no_conflicts	Uncertain_significance	NA	VUS	NO	SCV000829176|SCV005947043
35716007	ATM	NM_000051.4	NM_000051.4:c.4436+4A>G	-	splice_donor_region_variant	intron,splice_region	1	0.728	0.272	∆(E29)	0.211	∆(E28_29)	0.061	-	-	intermediate		-	27.2	>20 & <50	0.1	3964363	criteria_provided,_single_submitter	Uncertain_significance	NA	VUS	NO	SCV006174234
35716007	ATM	NM_000051.4	NM_000051.4:c.7307+1G>A	-	splice_donor_variant	intron,splice_donor	0.758	0	1	∆(E49q38); ∆(E49q38,E52); ∆(E49); ∆(E49,E52)	62.5%; 17.7%; 8.7%; 8.1%	-	-	-	-	complete	IF: 24.2% ∆(E52)	-	97	≥80	0.96	1066672	criteria_provided,_multiple_submitters,_no_conflicts	Pathogenic/Likely_pathogenic	NA	P/LP	YES	SCV001575133|SCV002669716|SCV004210149|SCV004933310|SCV005726014
35716007	ATM	NM_000051.4	NM_000051.4:c.7307+4A>G	-	splice_donor_region_variant	intron,splice_region	0.758	0	1	∆(E49q38); ∆(E49q38,E52)	86.5%; 13.5%	-	-	-	-	complete	IF: 24.2% ∆(E52)	-	100	≥80	0.63	181889	criteria_provided,_conflicting_classifications	Conflicting_classifications_of_pathogenicity	Likely_pathogenic(2)|Uncertain_significance(2)	VUS	NO	SCV000209639|SCV000217508|SCV001215260|SCV006092728
35716007	ATM	NM_000051.4	NM_000051.4:c.7515G>A	NP_000042.3:p.Lys2505=	splice_region_variant,synonymous_variant	exon,splice_region	0.758	0	1	∆(E50); ∆(E50,E52)	65.6%; 34.4%	-	-	-	-	complete	IF: 24.2% ∆(E52)	-	100	≥80	0.88	2732725	criteria_provided,_single_submitter	Uncertain_significance	NA	VUS	NO	SCV004290619
35716007	ATM	NM_000051.4	NM_000051.4:c.7515+6T>C	-	splice_donor_region_variant	intron,splice_region	0.758	0.484	0.361	∆(E50); ∆(E50,E52)	34.3%; 17.3%	-	-	-	-	intermediate	IF: 24.2% ∆(E52)	-	51.6	≥50 & <80	0.54	1018598	criteria_provided,_single_submitter	Uncertain_significance	NA	VUS	NO	SCV001508605
35716007	ATM	NM_000051.4	NM_000051.4:c.7629+2T>G	-	splice_donor_variant	intron,splice_donor	0.758	0	1	-	-	∆(E51)	1	-	-	complete	IF: 24.2% ∆(E52)	-	100	≥80	0.99	3148053	criteria_provided,_single_submitter	Likely_pathogenic	NA	LP	YES	SCV004932237
35716007	ATM	NM_000051.4	NM_000051.4:c.7630-3C>T	-	splice_polypyrimidine_tract_variant	intron,splice_region	0.758	0.221	0.708	-	-	∆(E52)	0.779	-	-	intermediate	IF: 24.2% ∆(E52)	-	77.9	≥50 & <80	0.38	230219	criteria_provided,_conflicting_classifications	Conflicting_classifications_of_pathogenicity	Uncertain_significance(3)|Likely_benign(2)	VUS	NO	SCV000273682|SCV000525409|SCV000817459|SCV000904773|SCV004212232
35716007	ATM	NM_000051.4	NM_000051.4:c.7630-2A>C	-	splice_acceptor_variant	intron,splice_acceptor	0.758	0	1	∆(E52p11)	0.336	∆(E52)	0.664	-	-	complete	IF: 24.2% ∆(E52)	-	100	≥80	0.91	127447	criteria_provided,_multiple_submitters,_no_conflicts	Pathogenic	NA	P	YES	SCV000149162|SCV000183992|SCV000260235|SCV000537667|SCV000611168|SCV000821703|SCV000838594|SCV001163273|SCV001246120|SCV001360530|SCV001429071|SCV001446566|SCV002010781|SCV002064123|SCV002573222|SCV002581768|SCV002758587|SCV002762783|SCV004175607|SCV004203883|SCV004931097|SCV005626304
35716007	ATM	NM_000051.4	NM_000051.4:c.7788G>A	NP_000042.3:p.Glu2596=	splice_region_variant,synonymous_variant	exon,splice_region	0.758	0	1	-	-	∆(E52)	1	-	-	complete	IF: 24.2% ∆(E52)	-	100	≥80	0.81	135778	criteria_provided,_multiple_submitters,_no_conflicts	Pathogenic/Likely_pathogenic	NA	P/LP	YES	SCV000166142|SCV000209647|SCV000275620|SCV000682435|SCV001432026|SCV002572940|SCV002813968|SCV004209470|SCV004811542|SCV004933427|SCV005919268|SCV006276858
35716007	ATM	NM_000051.4	NM_000051.4:c.7788+1G>C	-	splice_donor_variant	intron,splice_donor	0.758	0	1	-	-	∆(E52)	1	-	-	complete	IF: 24.2% ∆(E52)	-	100	≥80	0.82	1467603	criteria_provided,_multiple_submitters,_no_conflicts	Pathogenic/Likely_pathogenic	NA	P/LP	YES	SCV002251373|SCV002669045|SCV004931566|SCV005624228|SCV006324741
37725924	CHEK2	NM_007194.4	NM_007194.4:c.-7+4_-7+13del	-	splice_donor_region_variant	intron,splice_region	0.733	0	1	[Δ(E1q13)Δ(E4)▼(E4A38)]; Δ(E1q13,E5)	14.2%; 3.8%	5'UTR: Δ(E1q13); 5'UTR: ▼(I1-mg)	80.9%; 1.1%	-	-	complete	PTC: 13% [Δ(E4)▼(E4A38)]; 4% Δ(E5)	5'UTR: Δ(E1q13); 5'UTR: ▼(I1-mg)	18	≤20	0.89	418770	criteria_provided,_single_submitter	Uncertain_significance	NA	VUS	NO	SCV000566080
37725924	CHEK2	NM_007194.4	NM_007194.4:c.-6-6_-6-4del	-	splice_polypyrimidine_tract_variant	intron,splice_region	0.733	0.925	-0.262	-	-	5'UTR: Δ(E1q13); 5'UTR: ▼(I1-mg)	2.6%; 4.9%	-	-	no aberration	PTC: 13% [Δ(E4)▼(E4A38)]; 4% Δ(E5)	5'UTR: Δ(E1q13); 5'UTR: ▼(I1-mg)	0	≤20	0.37	1332001	criteria_provided,_single_submitter	Uncertain_significance	NA	VUS	NO	SCV002053214
37725924	CHEK2	NM_007194.4	NM_007194.4:c.-6G>A	-	splice_region_variant,5_prime_UTR_variant	exon,UTR,splice_region	0.733	0.749	-0.022	[Δ(E4)▼(E4A38)]; OTHER: Δ(E2_E3)	10.4%; 2.6%	5'UTR: ▼(I1-mg); 5'UTR: Δ(E1q13)	7.1%; 5.0%	-	-	no aberration	PTC: 13% [Δ(E4)▼(E4A38)]; 4% Δ(E5)	5'UTR: Δ(E1q13); 5'UTR: ▼(I1-mg)	13	≤20	0.09	128041	criteria_provided,_conflicting_classifications	Conflicting_classifications_of_pathogenicity	Uncertain_significance(3)|Benign(1)|Likely_benign(3)	B/LB	YES	SCV000149888|SCV000698814|SCV000910728|SCV001134173|SCV003919795|SCV004024672|SCV004044107
37725924	CHEK2	NM_007194.4	NM_007194.4:c.319G>A	NP_009125.1:p.Glu107Lys	missense_variant,splice_region_variant	exon,splice_region	0.733	0.26	0.645	OTHER: Δ(E2); OTHER: [Δ(E2)Δ(E4)▼(E4A38)]; OTHER: Δ(E1q13,E2); OTHER: Δ(E2,E5)	53.0%; 9.2%; 4.7%; 4.0%	-	-	881-nt	0.031	intermediate	PTC: 13% [Δ(E4)▼(E4A38)]; 4% Δ(E5)	-	70.9	≥50 & <80	0.36	856789	criteria_provided,_multiple_submitters,_no_conflicts	Uncertain_significance	NA	VUS	NO	SCV001227120|SCV002609127|SCV005089770
37725924	CHEK2	NM_007194.4	NM_007194.4:c.319+2T>A	-	splice_donor_variant	intron,splice_donor	0.733	0	1	OTHER: Δ(E2); OTHER: [Δ(E2)Δ(E4)▼(E4A38)]; OTHER: Δ(E2,E5); OTHER: Δ(E1q13,E2)	73.9%; 9.3%; 9.3%; 6.1%	-	-	482-nt	0.014	complete	PTC: 13% [Δ(E4)▼(E4A38)]; 4% Δ(E5)	-	98.6	≥80	0.99	142352	criteria_provided,_multiple_submitters,_no_conflicts	Pathogenic/Likely_pathogenic	NA	P/LP	YES	SCV000186416|SCV000211009|SCV000611186|SCV000633168|SCV000684628|SCV000698793|SCV000839501|SCV001371419|SCV001434899|SCV002019275|SCV004020221|SCV004024666|SCV004217592|SCV004221741|SCV005197507|SCV006324472
37725924	CHEK2	NM_007194.4	NM_007194.4:c.319+4del	-	splice_donor_region_variant	intron,splice_region	0.733	0	1	OTHER: Δ(E2); OTHER: [Δ(E2)Δ(E4)▼(E4A38)]; OTHER: Δ(E2,E5); OTHER: Δ(E1q13,E2)	74.2%; 9.8%; 7.6%; 7.4%	-	-	482-nt	0.01	complete	PTC: 13% [Δ(E4)▼(E4A38)]; 4% Δ(E5)	-	99	≥80	0.8	4002253	criteria_provided,_single_submitter	Uncertain_significance	NA	VUS	NO	SCV006212046
37725924	CHEK2	NM_007194.4	NM_007194.4:c.319+5G>T	-	splice_donor_region_variant	intron,splice_region	0.733	0.228	0.689	[Δ(E4)▼(E4A38)]; [Δ(E1q13)Δ(E4)▼(E4A38)] OTHER: Δ(E2); OTHER: Δ(E2,E5); OTHER: [Δ(E2)Δ(E4)▼(E4A38)]; OTHER: Δ(E1q13,E2)	2.7%; 1.4%; 37.4%; 9.8%; 5.0%; 4.6%	5'UTR: Δ(E1q13)	0.088	482-nt; 1446-nt; 881-nt	3.4%; 2.2%; 1.9%	intermediate	PTC: 13% [Δ(E4)▼(E4A38)]; 4% Δ(E5)	5'UTR: Δ(E1q13)	60.9	≥50 & <80	0.21	182448	criteria_provided,_multiple_submitters,_no_conflicts	Uncertain_significance	NA	VUS	NO	SCV000211010|SCV001545372|SCV005663141
37725924	CHEK2	NM_007194.4	NM_007194.4:c.320-3C>G	-	splice_polypyrimidine_tract_variant	intron,splice_region	0.733	0	1	Δ(E3); ▼(E3p2); [Δ(E3_E4)▼(E4A38)]; Δ(E1q13,E3); [Δ(E1q13)▼(E3p2)]; Δ(E3,E5)	55.2%; 32.0%; 4.4%; 4.1%; 2.3%; 2.0%	-	-	-	-	complete	PTC: 13% [Δ(E4)▼(E4A38)]; 4% Δ(E5)	-	100	≥80	0.84	1388933	criteria_provided,_multiple_submitters,_no_conflicts	Uncertain_significance	NA	VUS	NO	SCV002165934|SCV006212068
37725924	CHEK2	NM_007194.4	NM_007194.4:c.320-2A>G	-	splice_acceptor_variant	intron,splice_acceptor	0.733	0	1	Δ(E3); Δ(E1q13,E3); [Δ(E3_E4)▼(E4A38)]; Δ(E3p28)	70.0%; 20.6%; 4.9%; 4.5%	-	-	-	-	complete	PTC: 13% [Δ(E4)▼(E4A38)]; 4% Δ(E5)	-	100	≥80	1	1506291	criteria_provided,_single_submitter	Likely_pathogenic	NA	LP	YES	SCV002296816
37725924	CHEK2	NM_007194.4	NM_007194.4:c.444+1G>T	-	splice_donor_variant	intron,splice_donor	0.733	0	1	Δ(E3q1); Δ(E1q13,E3q1); OTHER: Δ(E2_E3)	66.9%; 10.8%; 8.3%	[Δ(E3q1_E4)▼(E4A38)]	0.14	-	-	complete	PTC: 13% [Δ(E4)▼(E4A38)]; 4% Δ(E5)	-	100	≥80	1	126914	criteria_provided,_multiple_submitters,_no_conflicts	Pathogenic/Likely_pathogenic	NA	P/LP	YES	SCV000253712|SCV000279576|SCV001184229|SCV002579541|SCV004020235|SCV006055233|SCV006276228
37725924	CHEK2	NM_007194.4	NM_007194.4:c.444+1G>A	-	splice_donor_variant	intron,splice_donor	0.733	0	1	▼(E3q4); [Δ(E1q13)▼(E3q4)]	87.2%; 12.8%	-	-	-	-	complete	PTC: 13% [Δ(E4)▼(E4A38)]; 4% Δ(E5)	-	100	≥80	1	128075	criteria_provided,_multiple_submitters,_no_conflicts	Pathogenic/Likely_pathogenic	NA	P/LP	YES	SCV000149926|SCV000186195|SCV000253902|SCV000266069|SCV000537642|SCV000594120|SCV000601168|SCV000821730|SCV000839944|SCV000894257|SCV000915969|SCV000917232|SCV001141371|SCV001245716|SCV001366166|SCV001440944|SCV001446511|SCV001478115|SCV001499789|SCV001934406|SCV002009496|SCV002019277|SCV002537436|SCV002556670|SCV002578144|SCV002578254|SCV002579688|SCV002758572|SCV002818309|SCV004020198|SCV004024…
37725924	CHEK2	NM_007194.4	NM_007194.4:c.444+3A>G	-	splice_donor_region_variant	intron,splice_region	0.733	0.739	-0.008	[Δ(E4)▼(E4A38)]	0.137	5'UTR: Δ(E1q13)	0.124	-	-	no aberration	PTC: 13% [Δ(E4)▼(E4A38)]; 4% Δ(E5)	5'UTR: Δ(E1q13)	13.7	≤20	0.11	140788	criteria_provided,_conflicting_classifications	Conflicting_classifications_of_pathogenicity	Uncertain_significance(4)|Likely_benign(2)	VUS	NO	SCV000172819|SCV000289688|SCV000680662|SCV000689687|SCV001482295|SCV004020231
37725924	CHEK2	NM_007194.4	NM_007194.4:c.444+6T>C	-	splice_donor_region_variant	intron,splice_region	0.733	0.733	0	[Δ(E4)▼(E4A38)]	0.155	5'UTR: Δ(E1q13)	0.112	-	-	no aberration	PTC: 13% [Δ(E4)▼(E4A38)]; 4% Δ(E5)	5'UTR: Δ(E1q13)	15.5	≤20	0.23	410065	criteria_provided,_conflicting_classifications	Conflicting_classifications_of_pathogenicity	Uncertain_significance(3)|Likely_benign(1)	VUS	NO	SCV000550556|SCV000569656|SCV001337885|SCV004361397
37725924	CHEK2	NM_007194.4	NM_007194.4:c.445-2A>G	-	splice_acceptor_variant	intron,splice_acceptor	0.733	0	1	[Δ(E4)▼(E4A38)]; [Δ(E1q13)Δ(E4)▼(E4A38)]; Δ(E4); Δ(E1q13,E4); Δ(E4_E5)	55.3%; 18.0%; 9.8%; 3.0%; 3.1%	-	-	952-nt	0.108	complete	PTC: 13% [Δ(E4)▼(E4A38)]; 4% Δ(E5)	-	89.2	≥80	0.99	631187	criteria_provided,_multiple_submitters,_no_conflicts	Likely_pathogenic	NA	LP	YES	SCV000913211|SCV000949406|SCV004045001
37725924	CHEK2	NM_007194.4	NM_007194.4:c.592+2T>G	-	splice_donor_variant	intron,splice_donor	0.733	0	1	[Δ(E4)▼(E4A38)]; Δ(E4); [Δ(E1q13)Δ(E4)▼(E4A38)]; Δ(E4_E5); Δ(E1q13,E4)	46.5%; 22.7%; 9.3%; 6.7%; 4.8%	-	-	952-nt	0.1	complete	PTC: 13% [Δ(E4)▼(E4A38)]; 4% Δ(E5)	-	90	≥80	0.99	2586650	criteria_provided,_multiple_submitters,_no_conflicts	Likely_pathogenic	NA	LP	YES	SCV004055681|SCV004361393
37725924	CHEK2	NM_007194.4	NM_007194.4:c.592+3A>T	-	splice_donor_region_variant	intron,splice_region	0.733	0	1	[Δ(E4)▼(E4A38)]; Δ(E4); [Δ(E1q13)Δ(E4)▼(E4A38)]; Δ(E4_E5); Δ(E1q13,E4)	53.6%; 17.7%; 7.8%; 7.6%; 1.9%	-	-	952-nt	0.114	complete	PTC: 13% [Δ(E4)▼(E4A38)]; 4% Δ(E5)	-	88.6	≥80	0.9	142956	criteria_provided,_multiple_submitters,_no_conflicts	Pathogenic/Likely_pathogenic	NA	P/LP	YES	SCV000187541|SCV000210967|SCV000289693|SCV000537545|SCV000601175|SCV000746463|SCV000839484|SCV001360505|SCV001446500|SCV002537620|SCV002581473|SCV003919095|SCV003919096|SCV004020108|SCV004022313|SCV004033931|SCV004217481|SCV004225582|SCV004238533|SCV005373471|SCV005416864|SCV005902016|SCV006055234|SCV006324327
37725924	CHEK2	NM_007194.4	NM_007194.4:c.592+4A>G	-	splice_donor_region_variant	intron,splice_region	0.733	0.353	0.518	[Δ(E4)▼(E4A38)]; Δ(E4); Δ(E4_E5); [Δ(E1q13)Δ(E4)▼(E4A38)]; Δ(E1q13,E4)	30.1%; 10.2%; 5.6%; 4.8%; 1.3%	5'UTR: Δ(E1q13)	0.058	952-nt	0.069	intermediate	PTC: 13% [Δ(E4)▼(E4A38)]; 4% Δ(E5)	5'UTR: Δ(E1q13)	52	≥50 & <80	0.1	186130	criteria_provided,_multiple_submitters,_no_conflicts	Uncertain_significance	NA	VUS	NO	SCV000216403|SCV000289694|SCV000568929|SCV000684665|SCV000888114|SCV001748713|SCV004043314|SCV004217591|SCV005663130|SCV006277771
37725924	CHEK2	NM_007194.4	NM_007194.4:c.593-11_593-7del	-	splice_polypyrimidine_tract_variant	intron,splice_region	0.733	0.123	0.832	Δ(E5); Δ(E1q13,E5)	62.0%; 25.7%	-	-	-	-	high	PTC: 13% [Δ(E4)▼(E4A38)]; 4% Δ(E5)	-	87.7	≥80	0.63	215865	criteria_provided,_conflicting_classifications	Conflicting_classifications_of_pathogenicity	Likely_pathogenic(2)|Uncertain_significance(8)|Likely_benign(3)	Conflicting	NO	SCV000253488|SCV000567733|SCV000684666|SCV000693078|SCV001467809|SCV002537623|SCV004020092|SCV004243024|SCV005625255|SCV005900129|SCV005920720|SCV006212010|SCV006277376
37725924	CHEK2	NM_007194.4	NM_007194.4:c.683+6T>C	-	splice_donor_region_variant	intron,splice_region	0.733	0.67	0.086	[Δ(E4)▼(E4A38)]	0.073	5'UTR: Δ(E1q13)	0.257	-	-	low	PTC: 13% [Δ(E4)▼(E4A38)]; 4% Δ(E5)	5'UTR: Δ(E1q13)	7.3	≤20	0.07	1060369	criteria_provided,_single_submitter	Uncertain_significance	NA	VUS	NO	SCV001566247
37725924	CHEK2	NM_007194.4	NM_007194.4:c.684-2A>G	-	splice_acceptor_variant	intron,splice_acceptor	0.733	0	1	▼(E6p1); Δ(E6p14); [Δ(E4)▼(E4A38)▼(E6p1)]; [Δ(E4)▼(E4A38)Δ(E6p14)]; Δ(E6p22); Δ(E1q13,E6p14)	40.4%; 33.9%; 9.2%; 6.5%; 5.2%; 4.8%	-	-	-	-	complete	PTC: 13% [Δ(E4)▼(E4A38)]; 4% Δ(E5)	-	100	≥80	1	1066705	criteria_provided,_multiple_submitters,_no_conflicts	Pathogenic/Likely_pathogenic	NA	P/LP	YES	SCV001575199|SCV002556725|SCV002665000|SCV002810263|SCV004045701|SCV004361383|SCV005058435|SCV005374635|SCV005912046
37725924	CHEK2	NM_007194.4	NM_007194.4:c.792+1G>A	-	splice_donor_variant	intron,splice_donor	0.733	0	1	▼(E6q119); Δ(E6q65); [Δ(E4)▼(E4A38)▼(E6q119)]; [Δ(E1q13)▼(E6q119)]; [Δ(E4)▼(E4A38)Δ(E6q65)]	58.7%; 24.4%; 7.7%; 3.4%; 3.2%	-	-	957-nt	0.026	complete	PTC: 13% [Δ(E4)▼(E4A38)]; 4% Δ(E5)	-	97.4	≥80	1	491638	criteria_provided,_multiple_submitters,_no_conflicts	Likely_pathogenic	NA	LP	YES	SCV000689722|SCV000941212|SCV001189438|SCV004043271
37725924	CHEK2	NM_007194.4	NM_007194.4:c.793-2A>G	-	splice_acceptor_variant	intron,splice_acceptor	0.895	0	1	▼(E7p1); [▼(E7p1)Δ(E10)]; [▼(E7p1)Δ(E8)]	83.0%; 14.2%; 2.8%	-	-	-	-	complete	PTC: 3% Δ(E8); IF: 7.5% Δ(E10)	-	100	≥80	0.99	491642	criteria_provided,_multiple_submitters,_no_conflicts	Pathogenic/Likely_pathogenic	NA	P/LP	YES	SCV000689727|SCV001380746|SCV004044942|SCV005025610|SCV006055237
37725924	CHEK2	NM_007194.4	NM_007194.4:c.793-1G>T	-	splice_acceptor_variant	intron,splice_acceptor	0.895	0	1	Δ(E7p7); Δ(E7_E8)	11.3%; 3.7%	Δ(E7); Δ(E7,E10)	74.6%; 10.4%	-	-	complete	PTC: 3% Δ(E8); IF: 7.5% Δ(E10)	-	100	≥80	0.99	801161	criteria_provided,_multiple_submitters,_no_conflicts	Likely_pathogenic	NA	LP	YES	SCV001134175|SCV001189454|SCV004217714
37725924	CHEK2	NM_007194.4	NM_007194.4:c.793-1G>A	-	splice_acceptor_variant	intron,splice_acceptor	0.895	0	1	Δ(E7p1); Δ(E7p1,E10); Δ(E7_E8)	63.7%; 5.5%; 2.4%	Δ(E7); Δ(E7,E10)	23.3%; 5.1%	-	-	complete	PTC: 3% Δ(E8); IF: 7.5% Δ(E10)	-	100	≥80	0.99	182430	criteria_provided,_multiple_submitters,_no_conflicts	Pathogenic/Likely_pathogenic	NA	P/LP	YES	SCV000210975|SCV000273338|SCV000537628|SCV000550453|SCV000839943|SCV000890134|SCV002809367|SCV004020113|SCV004217509|SCV004221756|SCV005689697|SCV005848185|SCV005894398|SCV005902060|SCV006055236|SCV006277734
37725924	CHEK2	NM_007194.4	NM_007194.4:c.846+1G>T	-	splice_donor_variant	intron,splice_donor	0.895	0	1	Δ(E7_E8)	0.05	Δ(E7); Δ(E7,E10)	84.2%; 10.8%	-	-	complete	PTC: 3% Δ(E8); IF: 7.5% Δ(E10)	-	100	≥80	0.99	530044	criteria_provided,_multiple_submitters,_no_conflicts	Pathogenic/Likely_pathogenic	NA	P/LP	YES	SCV000757056|SCV002676681|SCV004044192|SCV004217721|SCV005911616
37725924	CHEK2	NM_007194.4	NM_007194.4:c.846+5G>A	-	splice_donor_region_variant	intron,splice_region	0.895	0	1	Δ(E7_E8)	0.044	Δ(E7); Δ(E7,E10)	84.3%; 11.3%	-	-	complete	PTC: 3% Δ(E8); IF: 7.5% Δ(E10)	-	100	≥80	0.98	496346	criteria_provided,_multiple_submitters,_no_conflicts	Uncertain_significance	NA	VUS	NO	SCV000698820|SCV000757097|SCV002537645|SCV004023446|SCV005025611
37725924	CHEK2	NM_007194.4	NM_007194.4:c.846+6T>C	-	splice_donor_region_variant	intron,splice_region	0.895	0.082	0.908	Δ(E7_E8)	0.044	Δ(E7); Δ(E7,E10)	77.5%; 9.9%	-	-	high	PTC: 3% Δ(E8); IF: 7.5% Δ(E10)	-	91.8	≥80	0.6	530118	criteria_provided,_single_submitter	Uncertain_significance	NA	VUS	NO	SCV000757198
37725924	CHEK2	NM_007194.4	NM_007194.4:c.846+4_846+7del	-	splice_donor_region_variant	intron,splice_region	0.895	0	1	Δ(E7_E8)	0.058	Δ(E7); Δ(E7,E10)	80.3%; 13.9%	-	-	complete	PTC: 3% Δ(E8); IF: 7.5% Δ(E10)	-	100	≥80	0.99	216652	criteria_provided,_multiple_submitters,_no_conflicts	Pathogenic/Likely_pathogenic	NA	P/LP	YES	SCV000254953|SCV000272956|SCV000329279|SCV000888125|SCV000910787|SCV001447154|SCV002511770|SCV002537644|SCV002581484|SCV002821116|SCV003800241|SCV004044125|SCV004217653|SCV004698110|SCV005044020|SCV005045694|SCV005089762|SCV005093841|SCV005663119|SCV005920718|SCV006277681
37725924	CHEK2	NM_007194.4	NM_007194.4:c.847-14_847-2delinsGG	-	splice_acceptor_variant,splice_polypyrimidine_tract_variant	intron,splice_acceptor	0.895	0	1	Δ(E8); Δ(E8,E10)	81.4%; 18.6%	-	-	-	-	complete	PTC: 3% Δ(E8); IF: 7.5% Δ(E10)	-	100	≥80	0.88	439093	criteria_provided,_multiple_submitters,_no_conflicts	Likely_pathogenic	NA	LP	YES	SCV000601181|SCV001179015|SCV001348574|SCV004044221|SCV004217495|SCV004672368
37725924	CHEK2	NM_007194.4	NM_007194.4:c.908+1G>T	-	splice_donor_variant	intron,splice_donor	0.895	0	1	Δ(E8); Δ(E8,E10)	81.4%; 18.6%	-	-	-	-	complete	PTC: 3% Δ(E8); IF: 7.5% Δ(E10)	-	100	≥80	0.88	234715	criteria_provided,_multiple_submitters,_no_conflicts	Likely_pathogenic	NA	LP	YES	SCV000279725|SCV001180081|SCV001334886|SCV002571871|SCV004043259|SCV004286273
37725924	CHEK2	NM_007194.4	NM_007194.4:c.908+3A>T	-	splice_donor_region_variant	intron,splice_region	0.895	0	1	Δ(E8); Δ(E8,E10)	83.3%; 16.7%	-	-	-	-	complete	PTC: 3% Δ(E8); IF: 7.5% Δ(E10)	-	100	≥80	0.88	822989	criteria_provided,_conflicting_classifications	Conflicting_classifications_of_pathogenicity	Likely_pathogenic(1)|Uncertain_significance(2)	VUS	NO	SCV001180083|SCV001224109|SCV004217548
37725924	CHEK2	NM_007194.4	NM_007194.4:c.1008+4A>G	-	splice_donor_region_variant	intron,splice_region	0.895	0.928	-0.037	-	-	Δ(E10)	0.072	-	-	no aberration	PTC: 3% Δ(E8); IF: 7.5% Δ(E10)	-	7.2	≤20	0.03	921507	criteria_provided,_multiple_submitters,_no_conflicts	Uncertain_significance	NA	VUS	NO	SCV001346004|SCV001537949|SCV002736609
37725924	CHEK2	NM_007194.4	NM_007194.4:c.1009-5T>A	-	splice_polypyrimidine_tract_variant	intron,splice_region	0.895	0.018	0.98	Δ(E8,E10)	0.019	Δ(E10)	0.963	-	-	high	PTC: 3% Δ(E8); IF: 7.5% Δ(E10)	-	98.2	≥80	0.76	530060	criteria_provided,_single_submitter	Uncertain_significance	NA	VUS	NO	SCV000757088
37725924	CHEK2	NM_007194.4	NM_007194.4:c.1095G>C	NP_009125.1:p.Lys365Asn	missense_variant,splice_region_variant	exon,splice_region	0.895	0.058	0.935	Δ(E8,E10)	0.027	Δ(E10)	0.915	-	-	high	PTC: 3% Δ(E8); IF: 7.5% Δ(E10)	-	94.2	≥80	0.3	948601	criteria_provided,_multiple_submitters,_no_conflicts	Uncertain_significance	NA	VUS	NO	SCV001391855|SCV004055676
37725924	CHEK2	NM_007194.4	NM_007194.4:c.1095+1G>A	-	splice_donor_variant	intron,splice_donor	0.895	0	1	Δ(E8,E10)	0.048	Δ(E10)	0.952	-	-	complete	PTC: 3% Δ(E8); IF: 7.5% Δ(E10)	-	100	≥80	0.97	231770	criteria_provided,_multiple_submitters,_no_conflicts	Likely_pathogenic	NA	LP	YES	SCV000275717|SCV000550422|SCV000618481|SCV000889323|SCV004024639|SCV004043224|SCV005689638
37725924	CHEK2	NM_007194.4	NM_007194.4:c.1096-6T>G	-	splice_polypyrimidine_tract_variant	intron,splice_region	0.859	0	1	▼(E11p5); [▼(E11p5)Δ(E12p33)]	89.8%; 10.2%	-	-	-	-	complete	IF: 14% Δ(E12p33)	-	100	≥80	0.54	647204	criteria_provided,_multiple_submitters,_no_conflicts	Uncertain_significance	NA	VUS	NO	SCV000941446|SCV002780295|SCV004361359|SCV005197501
37725924	CHEK2	NM_007194.4	NM_007194.4:c.1259+5G>C	-	splice_donor_region_variant	intron,splice_region	0.859	0.683	0.205	Δ(E11); Δ(E11_E12p33)	21.1%; 2.1%	Δ(E12p33)	0.085	-	-	intermediate	IF: 14% Δ(E12p33)	-	31.7	>20 & <50	0.66	1171383	criteria_provided,_single_submitter	Uncertain_significance	NA	VUS	NO	SCV001734302
37725924	CHEK2	NM_007194.4	NM_007194.4:c.1260-8A>G	-	splice_polypyrimidine_tract_variant	intron,splice_region	0.859	0	1	▼(E12p7)	0.99	Δ(E12p33)	0.01	-	-	complete	IF: 14% Δ(E12p33)	-	100	≥80	0.99	216641	criteria_provided,_conflicting_classifications	Conflicting_classifications_of_pathogenicity	Pathogenic(2)|Likely_pathogenic(5)|Uncertain_significance(1)	P/LP	YES	SCV000254921|SCV000567855|SCV000689646|SCV002681983|SCV004217674|SCV004228263|SCV005432613|SCV005872388
37725924	CHEK2	NM_007194.4	NM_007194.4:c.1375G>A	NP_009125.1:p.Ala459Thr	missense_variant,splice_region_variant	exon,splice_region	0.859	0	1	Δ(E12); Δ(E12_E13)	98.9%; 1.1%	-	-	-	-	complete	IF: 14% Δ(E12p33)	-	100	≥80	0.54	570196	criteria_provided,_multiple_submitters,_no_conflicts	Uncertain_significance	NA	VUS	NO	SCV000818739|SCV002699492|SCV005903090
37725924	CHEK2	NM_007194.4	NM_007194.4:c.1375+1_1375+2del	-	splice_donor_variant	intron,splice_donor	0.859	0	1	Δ(E12)	1	-	-	-	-	complete	IF: 14% Δ(E12p33)	-	100	≥80	0.99	234023	criteria_provided,_multiple_submitters,_no_conflicts	Likely_pathogenic	NA	LP	YES	SCV000278506|SCV000964756|SCV004044430|SCV006276950
37725924	CHEK2	NM_007194.4	NM_007194.4:c.1376-1G>C	-	splice_acceptor_variant	intron,splice_acceptor	0.859	0	1	Δ(E13); Δ(E13p17); Δ(E13p20); Δ(E12p33,E13); Δ(E12p33,E13p17); Δ(E12p33,E13p20); Δ(E12_E13)	51.4%; 22.2%; 11.2%; 7.9%; 3.9%; 1.9%; 1.5%	-	-	-	-	complete	IF: 14% Δ(E12p33)	-	100	≥80	0.94	410064	criteria_provided,_multiple_submitters,_no_conflicts	Likely_pathogenic	NA	LP	YES	SCV000550555|SCV000664799|SCV004043345|SCV005058426
37725924	CHEK2	NM_007194.4	NM_007194.4:c.1459C>T	NP_009125.1:p.Gln487Ter	stop_gained,splice_region_variant	exon,splice_region	0.859	0.734	0.146	Δ(E13); Δ(E12p33,E13); Δ(E12_E13)	12.5%; 1.8%; 1.5%	Δ(E12p33)	0.108	-	-	low	IF: 14% Δ(E12p33)	-	26.6	N/A (stop gained)	0.11	231595	criteria_provided,_multiple_submitters,_no_conflicts	Pathogenic	NA	P	NO	SCV000275496|SCV000779472|SCV000828198|SCV004045045
37725924	CHEK2	NM_007194.4	NM_007194.4:c.1461+5G>T	-	splice_donor_region_variant	intron,splice_region	0.859	0	1	Δ(E13); Δ(E12p33,E13); Δ(E12_E13)	85.8%; 12.8%; 1.4%	-	-	-	-	complete	IF: 14% Δ(E12p33)	-	100	≥80	0.9	418975	criteria_provided,_conflicting_classifications	Conflicting_classifications_of_pathogenicity	Likely_pathogenic(2)|Uncertain_significance(3)	VUS	NO	SCV000566438|SCV000942475|SCV002696984|SCV002761096|SCV005423829
37725924	CHEK2	NM_007194.4	NM_007194.4:c.1542G>T	NP_009125.1:p.Gln514His	missense_variant,splice_region_variant	exon,splice_region	0.859	0	1	-	-	Δ(E14q12); Δ(E12p33,E14q12)	83.9%; 15.1%	632-nt	0.01	complete	IF: 14% Δ(E12p33)	Δ(E14q12)	15.1	≤20	0.84	410014	criteria_provided,_multiple_submitters,_no_conflicts	Uncertain_significance	NA	VUS	NO	SCV000550448|SCV000666383|SCV000689667|SCV002008997|SCV004020148|SCV004217717
37725924	CHEK2	NM_007194.4	NM_007194.4:c.1542+3A>G	-	splice_donor_region_variant	intron,splice_region	0.859	0	1	▼(E14q2); [Δ(E12p33)▼(E14q2)]	70.4%; 10.7%	Δ(E14q12); Δ(E12p33,E14q12)	16.9%; 2.0%	-	-	complete	IF: 14% Δ(E12p33)	Δ(E14q12)	83.1	≥80	0.46	410067	criteria_provided,_conflicting_classifications	Conflicting_classifications_of_pathogenicity	Likely_pathogenic(2)|Uncertain_significance(5)	VUS	NO	SCV000550560|SCV000669235|SCV000698781|SCV001340910|SCV004168905|SCV004217541|SCV005625995
37725924	CHEK2	NM_007194.4	NM_007194.4:c.1543-9_1546del	-	splice_acceptor_variant,coding_sequence_variant	exon,intron,splice_acceptor	0.859	0	1	Δ(E15p11); Δ(E12p33,E15p11)	84.9%; 15.1%	-	-	-	-	complete	IF: 14% Δ(E12p33)	-	100	≥80	0.98	530119	criteria_provided,_multiple_submitters,_no_conflicts	Pathogenic/Likely_pathogenic	NA	P/LP	YES	SCV000757200|SCV004044547
30883759	BRCA2	NM_000059.4	NM_000059.4:c.48dup	NP_000050.3:p.Thr17AspfsTer14	frameshift_variant	exon	0.919	0.962	-0.047	Δ(E5)	0.025	Δ(E3)	0.013	-	-	no aberration	PTC: 3% Δ(E5); 3% Δ(E6q39_E7); 0.6% Δ(E5_E6) IF: 0.8% Δ(E3)	-	3.8	N/A (frameshift - DNA level)	0.02	266836	reviewed_by_expert_panel	Pathogenic	NA	P	NO	SCV000324282
30883759	BRCA2	NM_000059.4	NM_000059.4:c.62A>G	NP_000050.3:p.Lys21Arg	missense_variant	exon	0.919	0.939	-0.022	Δ(E6q39_E7)	0.027	-	-	857-nt	0.034	no aberration	PTC: 3% Δ(E5); 3% Δ(E6q39_E7); 0.6% Δ(E5_E6) IF: 0.8% Δ(E3)	-	2.7	≤20	0.02	38033	criteria_provided,_conflicting_classifications	Conflicting_classifications_of_pathogenicity	Uncertain_significance(7)|Likely_benign(3)	VUS	NO	SCV000166181|SCV000184332|SCV000210251|SCV000537556|SCV000600690|SCV001138937|SCV001362936|SCV003932746|SCV004846360|SCV005199765
30883759	BRCA2	NM_000059.4	NM_000059.4:c.67G>A	NP_000050.3:p.Asp23Asn	missense_variant,splice_region_variant	exon,splice_region	0.919	0.077	0.916	Δ(E2q4)	0.89	-	-	963-nt	0.033	high	PTC: 3% Δ(E5); 3% Δ(E6q39_E7); 0.6% Δ(E5_E6) IF: 0.8% Δ(E3)	-	89	≥80	0.59	225732	criteria_provided,_conflicting_classifications	Conflicting_classifications_of_pathogenicity	Likely_pathogenic(1)|Uncertain_significance(2)	VUS	NO	SCV000267724|SCV000635532|SCV004052581
30883759	BRCA2	NM_000059.4	NM_000059.4:c.67+1G>T	-	splice_donor_variant	intron,splice_donor	0.919	0	1	Δ(E2)	1	-	-	-	-	complete	PTC: 3% Δ(E5); 3% Δ(E6q39_E7); 0.6% Δ(E5_E6) IF: 0.8% Δ(E3)	-	100	≥80	0.98	52161	reviewed_by_expert_panel	Pathogenic	NA	P	YES	SCV001161560
30883759	BRCA2	NM_000059.4	NM_000059.4:c.67+2T>C	-	splice_donor_variant	intron,splice_donor	0.919	0	1	Δ(E2); Δ(E3_E4)	83.7%; 8.7%	-	-	609-nt; 757-nt; 860-nt	0.9%; 2.0%; 4.7%	complete	PTC: 3% Δ(E5); 3% Δ(E6q39_E7); 0.6% Δ(E5_E6) IF: 0.8% Δ(E3)	-	92.4	≥80	0.94	52163	criteria_provided,_multiple_submitters,_no_conflicts	Pathogenic	NA	P	YES	SCV000073037|SCV000327503|SCV000577942|SCV000804388|SCV001133872|SCV001337839|SCV001773614|SCV003932750|SCV004848792|SCV006110171|SCV006196609
30883759	BRCA2	NM_000059.4	NM_000059.4:c.67+3A>G	-	splice_donor_region_variant	intron,splice_region	0.919	0.024	0.974	Δ(E2); Δ(E3_E4)	77.6%; 10.5%	-	-	609-nt; 757-nt; 860-nt	1.1%; 2.4%; 6.0%	high	PTC: 3% Δ(E5); 3% Δ(E6q39_E7); 0.6% Δ(E5_E6) IF: 0.8% Δ(E3)	-	88.1	≥80	0.58	826563	criteria_provided,_multiple_submitters,_no_conflicts	Pathogenic/Likely_pathogenic	NA	P/LP	YES	SCV001187757|SCV002234050|SCV004361153
30883759	BRCA2	NM_000059.4	NM_000059.4:c.68-7T>A	-	splice_polypyrimidine_tract_variant	intron,splice_region	0.919	0.9	0.021	Δ(E6q39_E7)	0.072	Δ(E3)	0.028	-	-	low	PTC: 3% Δ(E5); 3% Δ(E6q39_E7); 0.6% Δ(E5_E6) IF: 0.8% Δ(E3)	-	10	≤20	0.07	52187	reviewed_by_expert_panel	Benign	NA	B	YES	SCV000783127
30883759	BRCA2	NM_000059.4	NM_000059.4:c.71T>A	NP_000050.3:p.Leu24Ter	stop_gained	exon	0.919	0.972	-0.058	Δ(E6q39_E7)	0.028	-	-	-	-	no aberration	PTC: 3% Δ(E5); 3% Δ(E6q39_E7); 0.6% Δ(E5_E6) IF: 0.8% Δ(E3)	-	2.8	N/A (stop gained)	0.01	52285	reviewed_by_expert_panel	Pathogenic	NA	P	NO	SCV000783700
30883759	BRCA2	NM_000059.4	NM_000059.4:c.79A>G	NP_000050.3:p.Ile27Val	missense_variant	exon	0.919	0.973	-0.059	Δ(E6q39_E7)	0.027	-	-	-	-	no aberration	PTC: 3% Δ(E5); 3% Δ(E6q39_E7); 0.6% Δ(E5_E6) IF: 0.8% Δ(E3)	-	2.7	≤20	0.01	52467	criteria_provided,_conflicting_classifications	Conflicting_classifications_of_pathogenicity	Uncertain_significance(5)|Benign(2)|Likely_benign(2)	VUS	NO	SCV000215554|SCV000618196|SCV000903894|SCV001470451|SCV001539079|SCV004211818|SCV004813941|SCV004846365|SCV005876294
30883759	BRCA2	NM_000059.4	NM_000059.4:c.92G>A	NP_000050.3:p.Trp31Ter	stop_gained	exon	0.919	0.52	0.434	Δ(E5); Δ(E5_E6)	3.3%; 1.5%	Δ(E3)	0.355	715-nt; 675-nt	4.8%; 2.8%	intermediate	PTC: 3% Δ(E5); 3% Δ(E6q39_E7); 0.6% Δ(E5_E6) IF: 0.8% Δ(E3)	-	40.3	N/A (stop gained)	0.22	52808	reviewed_by_expert_panel	Pathogenic	NA	P	NO	SCV000300292
30883759	BRCA2	NM_000059.4	NM_000059.4:c.92G>C	NP_000050.3:p.Trp31Ser	missense_variant	exon	0.919	0.946	-0.029	Δ(E5); Δ(E6q39_E7)	1.7%; 2.2%	-	-	-	-	no aberration	PTC: 3% Δ(E5); 3% Δ(E6q39_E7); 0.6% Δ(E5_E6) IF: 0.8% Δ(E3)	-	3.9	≤20	0.01	2098802	criteria_provided,_multiple_submitters,_no_conflicts	Likely_pathogenic	NA	LP	NO	SCV003316870|SCV003828006
30883759	BRCA2	NM_000059.4	NM_000059.4:c.97G>A	NP_000050.3:p.Glu33Lys	missense_variant	exon	0.919	0.233	0.746	Δ(E6q39_E7)	0.014	Δ(E3)	0.711	715-nt	0.042	intermediate	PTC: 3% Δ(E5); 3% Δ(E6q39_E7); 0.6% Δ(E5_E6) IF: 0.8% Δ(E3)	-	72.5	≥50 & <80	0.14	964438	criteria_provided,_multiple_submitters,_no_conflicts	Uncertain_significance	NA	VUS	NO	SCV001411483|SCV004005395
30883759	BRCA2	NM_000059.4	NM_000059.4:c.121C>T	NP_000050.3:p.Pro41Ser	missense_variant	exon	0.919	0.945	-0.028	Δ(E5)	0.055	-	-	-	-	no aberration	PTC: 3% Δ(E5); 3% Δ(E6q39_E7); 0.6% Δ(E5_E6) IF: 0.8% Δ(E3)	-	5.5	≤20	0	51085	criteria_provided,_conflicting_classifications	Conflicting_classifications_of_pathogenicity	Likely_pathogenic(1)|Uncertain_significance(7)|Likely_benign(2)	Conflicting	NO	SCV000071773|SCV000218327|SCV001247632|SCV001347761|SCV003843699|SCV004242627|SCV004846374|SCV005059127|SCV005408484|SCV006060045
30883759	BRCA2	NM_000059.4	NM_000059.4:c.143A>G	NP_000050.3:p.Glu48Gly	missense_variant	exon	0.919	0.703	0.235	-	-	Δ(E3)	0.269	715-nt	0.029	intermediate	PTC: 3% Δ(E5); 3% Δ(E6q39_E7); 0.6% Δ(E5_E6) IF: 0.8% Δ(E3)	-	26.9	>20 & <50	0.13	819217	criteria_provided,_multiple_submitters,_no_conflicts	Uncertain_significance	NA	VUS	NO	SCV001171919|SCV002207168
30883759	BRCA2	NM_000059.4	NM_000059.4:c.144del	NP_000050.3:p.Glu49AsnfsTer31	frameshift_variant	exon	0.919	0.787	0.144	Δ(E5); Δ(E6q39_E7)	3.4%; 2.1%	Δ(E3)	0.158	-	-	low	PTC: 3% Δ(E5); 3% Δ(E6q39_E7); 0.6% Δ(E5_E6) IF: 0.8% Δ(E3)	-	21.3	N/A (frameshift - DNA level)	0.26	220237	reviewed_by_expert_panel	Pathogenic	NA	P	NO	SCV000300299
30883759	BRCA2	NM_000059.4	NM_000059.4:c.215A>G	NP_000050.3:p.Asn72Ser	missense_variant	exon	0.919	0.79	0.14	Δ(E5); Δ(E6q39_E7)	6.6%; 1.8%	Δ(E3)	0.083	927-nt; 715-nt	2.6%; 1.8%	low	PTC: 3% Δ(E5); 3% Δ(E6q39_E7); 0.6% Δ(E5_E6) IF: 0.8% Δ(E3)	-	16.7	≤20	0.04	51251	criteria_provided,_conflicting_classifications	Conflicting_classifications_of_pathogenicity	Uncertain_significance(5)|Benign(1)|Likely_benign(3)	VUS	NO	SCV000071965|SCV000210433|SCV000661174|SCV000911190|SCV001715035|SCV002014954|SCV003843529|SCV005689370|SCV005915483
30883759	BRCA2	NM_000059.4	NM_000059.4:c.217C>T	NP_000050.3:p.Gln73Ter	stop_gained	exon	0.919	0.789	0.141	-	-	Δ(E3)	0.211	-	-	low	PTC: 3% Δ(E5); 3% Δ(E6q39_E7); 0.6% Δ(E5_E6) IF: 0.8% Δ(E3)	-	21.1	N/A (stop gained)	0.17	91770	reviewed_by_expert_panel	Pathogenic	NA	P	NO	SCV000300308
30883759	BRCA2	NM_000059.4	NM_000059.4:c.222G>A	NP_000050.3:p.Leu74=	synonymous_variant	exon	0.919	0.623	0.322	Δ(E5); Δ(E6q39_E7)	2.1%; 1.7%	Δ(E3)	0.315	715-nt	0.024	intermediate	PTC: 3% Δ(E5); 3% Δ(E6q39_E7); 0.6% Δ(E5_E6) IF: 0.8% Δ(E3)	-	35.3	>20 & <50	0.05	384193	reviewed_by_expert_panel	Likely_benign	NA	LB	YES	SCV000578482
30883759	BRCA2	NM_000059.4	NM_000059.4:c.244A>T	NP_000050.3:p.Lys82Ter	stop_gained	exon	0.919	0.913	0.007	Δ(E5); Δ(E6q39_E7)	2.4%; 2.4%	Δ(E3)	0.039	-	-	low	PTC: 3% Δ(E5); 3% Δ(E6q39_E7); 0.6% Δ(E5_E6) IF: 0.8% Δ(E3)	-	8.7	N/A (stop gained)	0.12	51288	reviewed_by_expert_panel	Pathogenic	NA	P	NO	SCV000324075
30883759	BRCA2	NM_000059.4	NM_000059.4:c.250C>T	NP_000050.3:p.Gln84Ter	stop_gained	exon	0.919	0.965	-0.05	Δ(E6q39_E7)	0.035	-	-	-	-	no aberration	PTC: 3% Δ(E5); 3% Δ(E6q39_E7); 0.6% Δ(E5_E6) IF: 0.8% Δ(E3)	-	3.5	N/A (stop gained)	0.23	51298	reviewed_by_expert_panel	Pathogenic	NA	P	NO	SCV000282368
30883759	BRCA2	NM_000059.4	NM_000059.4:c.316+2T>C	-	splice_donor_variant	intron,splice_donor	0.919	0	1	-	-	Δ(E3)	0.962	715-nt	0.038	complete	PTC: 3% Δ(E5); 3% Δ(E6q39_E7); 0.6% Δ(E5_E6) IF: 0.8% Δ(E3)	-	96.2	≥80	0.95	51407	reviewed_by_expert_panel	Pathogenic	NA	P	YES	SCV001156530
30883759	BRCA2	NM_000059.4	NM_000059.4:c.316+3del	-	splice_donor_region_variant	intron,splice_region	0.919	0	1	-	-	Δ(E3)	0.886	715-nt; 675-nt	7.0%; 2.3%	complete	PTC: 3% Δ(E5); 3% Δ(E6q39_E7); 0.6% Δ(E5_E6) IF: 0.8% Δ(E3)	-	88.6	≥80	0.96	51408	reviewed_by_expert_panel	Pathogenic	NA	P	YES	SCV001156531
30883759	BRCA2	NM_000059.4	NM_000059.4:c.316+5G>C	-	splice_donor_region_variant	intron,splice_region	0.919	0	1	-	-	Δ(E3)	0.903	715-nt; 675-nt	7.3%; 2.4%	complete	PTC: 3% Δ(E5); 3% Δ(E6q39_E7); 0.6% Δ(E5_E6) IF: 0.8% Δ(E3)	-	90.3	≥80	0.92	51410	reviewed_by_expert_panel	Pathogenic	NA	P	YES	SCV001156533
30883759	BRCA2	NM_000059.4	NM_000059.4:c.316+6T>C	-	splice_donor_region_variant	intron,splice_region	0.919	0.219	0.762	-	-	Δ(E3)	0.687	715-nt; 675-nt	7.0%; 2.4%	intermediate	PTC: 3% Δ(E5); 3% Δ(E6q39_E7); 0.6% Δ(E5_E6) IF: 0.8% Δ(E3)	-	68.7	≥50 & <80	0.2	51411	criteria_provided,_multiple_submitters,_no_conflicts	Uncertain_significance	NA	VUS	NO	SCV001562544|SCV002046667|SCV004063121|SCV004212879|SCV004361161
30883759	BRCA2	NM_000059.4	NM_000059.4:c.317-2A>G	-	splice_acceptor_variant	intron,splice_acceptor	0.919	0	1	Δ(E4); Δ(E4_E6)	62.9%; 13.3%	Δ(E4_E5)	0.238	-	-	complete	PTC: 3% Δ(E5); 3% Δ(E6q39_E7); 0.6% Δ(E5_E6) IF: 0.8% Δ(E3)	Δ(E4_E5)	76.2	≥50 & <80	0.98	432106	criteria_provided,_multiple_submitters,_no_conflicts	Pathogenic/Likely_pathogenic	NA	P/LP	YES	SCV000589790|SCV005831462
30883759	BRCA2	NM_000059.4	NM_000059.4:c.352C>T	NP_000050.3:p.Arg118Cys	missense_variant	exon	0.919	0.737	0.198	Δ(E4); Δ(E4_E6)	11.6%; 8.4%	Δ(E4_E5)	0.063	-	-	low	PTC: 3% Δ(E5); 3% Δ(E6q39_E7); 0.6% Δ(E5_E6) IF: 0.8% Δ(E3)	Δ(E4_E5)	20	≤20	0.15	91803	criteria_provided,_conflicting_classifications	Conflicting_classifications_of_pathogenicity	Uncertain_significance(9)|Benign(1)|Likely_benign(3)	VUS	NO	SCV000184384|SCV000210234|SCV000219151|SCV000265924|SCV000602799|SCV000694701|SCV000911378|SCV001133762|SCV001434309|SCV002067793|SCV002533806|SCV004211791|SCV005045430
30883759	BRCA2	NM_000059.4	NM_000059.4:c.356C>G	NP_000050.3:p.Thr119Arg	missense_variant	exon	0.919	0.879	0.044	Δ(E5); Δ(E5_E6); Δ(E6q39_E7)	6.5%; 2.9%; 2.7%	-	-	-	-	low	PTC: 3% Δ(E5); 3% Δ(E6q39_E7); 0.6% Δ(E5_E6) IF: 0.8% Δ(E3)	-	12.1	≤20	0.02	2819803	criteria_provided,_single_submitter	Uncertain_significance	NA	VUS	NO	SCV004486979
30883759	BRCA2	NM_000059.4	NM_000059.4:c.368_372del	NP_000050.3:p.Lys123ArgfsTer5	frameshift_variant	exon	0.919	0.706	0.232	Δ(E4); Δ(E4_E6)	13.7%; 8.9%	Δ(E4_E5)	0.068	-	-	intermediate	PTC: 3% Δ(E5); 3% Δ(E6q39_E7); 0.6% Δ(E5_E6) IF: 0.8% Δ(E3)	Δ(E4_E5)	22.6	N/A (frameshift - DNA level)	0.07	266764	reviewed_by_expert_panel	Pathogenic	NA	P	NO	SCV000324174
30883759	BRCA2	NM_000059.4	NM_000059.4:c.375T>A	NP_000050.3:p.Asp125Glu	missense_variant	exon	0.919	0.931	-0.013	Δ(E5)	0.069	-	-	-	-	no aberration	PTC: 3% Δ(E5); 3% Δ(E6q39_E7); 0.6% Δ(E5_E6) IF: 0.8% Δ(E3)	-	6.9	≤20	0	51517	criteria_provided,_conflicting_classifications	Conflicting_classifications_of_pathogenicity	Uncertain_significance(4)|Likely_benign(4)	VUS	NO	SCV000187557|SCV000694717|SCV000730232|SCV000906877|SCV001138955|SCV001509205|SCV002533818|SCV004846768
30883759	BRCA2	NM_000059.4	NM_000059.4:c.378A>G	NP_000050.3:p.Gln126=	synonymous_variant	exon	0.919	0.54	0.412	Δ(E4); Δ(E4_E6)	25.6%; 9.4%	Δ(E4_E5)	0.109	-	-	intermediate	PTC: 3% Δ(E5); 3% Δ(E6q39_E7); 0.6% Δ(E5_E6) IF: 0.8% Δ(E3)	Δ(E4_E5)	35	>20 & <50	0.1	184648	reviewed_by_expert_panel	Likely_benign	NA	LB	YES	SCV000578800
30883759	BRCA2	NM_000059.4	NM_000059.4:c.379G>T	NP_000050.3:p.Ala127Ser	missense_variant	exon	0.919	0.841	0.085	Δ(E4); Δ(E4_E6); Δ(E5); Δ(E5_E6)	4.0%; 4.3%; 5.8%; 1.9%	-	-	-	-	low	PTC: 3% Δ(E5); 3% Δ(E6q39_E7); 0.6% Δ(E5_E6) IF: 0.8% Δ(E3)	-	16	≤20	0.03	51526	criteria_provided,_conflicting_classifications	Conflicting_classifications_of_pathogenicity	Uncertain_significance(3)|Likely_benign(1)	VUS	NO	SCV000683582|SCV001508697|SCV002620143|SCV005424238
30883759	BRCA2	NM_000059.4	NM_000059.4:c.383A>G	NP_000050.3:p.Asp128Gly	missense_variant	exon	0.919	0.783	0.148	Δ(E4); Δ(E4q43); Δ(E4_E6); Δ(E5)	3.6%; 12.1%; 3.9%; 2.1%	-	-	-	-	low	PTC: 3% Δ(E5); 3% Δ(E6q39_E7); 0.6% Δ(E5_E6) IF: 0.8% Δ(E3)	-	21.7	>20 & <50	0.39	51538	criteria_provided,_conflicting_classifications	Conflicting_classifications_of_pathogenicity	Uncertain_significance(10)|Likely_benign(3)	VUS	NO	SCV000072292|SCV000186977|SCV000694719|SCV000887799|SCV000911861|SCV001138956|SCV002008813|SCV002533824|SCV004213684|SCV004846769|SCV005374650|SCV006277579|SCV006557831
30883759	BRCA2	NM_000059.4	NM_000059.4:c.394_398del	NP_000050.3:p.Cys132ThrfsTer7	frameshift_variant	exon	0.919	0.92	-0.001	Δ(E5); Δ(E6q39_E7)	3.3%; 3.1%	-	-	817-nt	0.016	no aberration	PTC: 3% Δ(E5); 3% Δ(E6q39_E7); 0.6% Δ(E5_E6) IF: 0.8% Δ(E3)	-	6.4	N/A (frameshift - DNA level)	0.03	2863032	criteria_provided,_multiple_submitters,_no_conflicts	Pathogenic/Likely_pathogenic	NA	P/LP	NO	SCV004462227|SCV005624414
30883759	BRCA2	NM_000059.4	NM_000059.4:c.407del	NP_000050.3:p.Asn136IlefsTer16	frameshift_variant	exon	0.919	0.878	0.045	Δ(E5)	0.08	Δ(E3)	0.015	927-nt	0.027	low	PTC: 3% Δ(E5); 3% Δ(E6q39_E7); 0.6% Δ(E5_E6) IF: 0.8% Δ(E3)	-	9.5	N/A (frameshift - DNA level)	0.03	37876	reviewed_by_expert_panel	Pathogenic	NA	P	NO	SCV000300319
30883759	BRCA2	NM_000059.4	NM_000059.4:c.426-2A>T	-	splice_acceptor_variant	intron,splice_acceptor	0.919	0	1	Δ(E5)	1	-	-	-	-	complete	PTC: 3% Δ(E5); 3% Δ(E6q39_E7); 0.6% Δ(E5_E6) IF: 0.8% Δ(E3)	-	100	≥80	0.98	267643	criteria_provided,_single_submitter	Pathogenic	NA	P	YES	SCV000327001
30883759	BRCA2	NM_000059.4	NM_000059.4:c.438A>G	NP_000050.3:p.Leu146=	synonymous_variant	exon	0.919	0.95	-0.034	Δ(E4); Δ(E6q39_E7)	1.8%; 3.2%	-	-	-	-	no aberration	PTC: 3% Δ(E5); 3% Δ(E6q39_E7); 0.6% Δ(E5_E6) IF: 0.8% Δ(E3)	-	5	≤20	0	427541	reviewed_by_expert_panel	Likely_benign	NA	LB	YES	SCV000579159
30883759	BRCA2	NM_000059.4	NM_000059.4:c.440A>G	NP_000050.3:p.Gln147Arg	missense_variant	exon	0.919	0.937	-0.02	Δ(E6q39_E7)	0.046	Δ(E3)	0.017	-	-	no aberration	PTC: 3% Δ(E5); 3% Δ(E6q39_E7); 0.6% Δ(E5_E6) IF: 0.8% Δ(E3)	-	6.3	≤20	0.02	51644	reviewed_by_expert_panel	Benign	NA	B	YES	SCV001161532
30883759	BRCA2	NM_000059.4	NM_000059.4:c.440A>T	NP_000050.3:p.Gln147Leu	missense_variant	exon	0.919	0.801	0.129	Δ(E5); Δ(E6q39_E7)	15.7%; 2.5%	-	-	817-nt	0.017	low	PTC: 3% Δ(E5); 3% Δ(E6q39_E7); 0.6% Δ(E5_E6) IF: 0.8% Δ(E3)	-	18.2	≤20	0.02	37900	criteria_provided,_multiple_submitters,_no_conflicts	Uncertain_significance	NA	VUS	NO	SCV000215235|SCV000568903|SCV000600588|SCV000694769|SCV000957209|SCV001347750|SCV002533870|SCV004211945|SCV004846774|SCV005916576
30883759	BRCA2	NM_000059.4	NM_000059.4:c.441A>G	NP_000050.3:p.Gln147=	synonymous_variant	exon	0.919	0	1	Δ(E5); Δ(E5_E6)	96%; 4%	-	-	-	-	complete	PTC: 3% Δ(E5); 3% Δ(E6q39_E7); 0.6% Δ(E5_E6) IF: 0.8% Δ(E3)	-	100	≥80	0.04	51645	reviewed_by_expert_panel	Likely_benign	NA	LB	YES	SCV000578756
30883759	BRCA2	NM_000059.4	NM_000059.4:c.447A>G	NP_000050.3:p.Thr149=	synonymous_variant	exon	0.919	0.929	-0.011	Δ(E6q39_E7)	0.043	Δ(E3)	0.028	-	-	no aberration	PTC: 3% Δ(E5); 3% Δ(E6q39_E7); 0.6% Δ(E5_E6) IF: 0.8% Δ(E3)	-	7.1	≤20	0.01	1740873	criteria_provided,_multiple_submitters,_no_conflicts	Likely_benign	NA	LB	YES	SCV002636111|SCV003324991
30883759	BRCA2	NM_000059.4	NM_000059.4:c.451G>A	NP_000050.3:p.Val151Ile	missense_variant	exon	0.919	0	1	Δ(E5); Δ(E5_E6)	89.2%; 9.6%	Δ(E7_E8)	0.013	-	-	complete	PTC: 3% Δ(E5); 3% Δ(E6q39_E7); 0.6% Δ(E5_E6) IF: 0.8% Δ(E3)	Δ(E7_E8)	98.8	≥80	0.01	37908	criteria_provided,_conflicting_classifications	Conflicting_classifications_of_pathogenicity	Uncertain_significance(3)|Likely_benign(1)	VUS	NO	SCV000668747|SCV000812619|SCV002571273|SCV004114519
30883759	BRCA2	NM_000059.4	NM_000059.4:c.467A>G	NP_000050.3:p.Asp156Gly	missense_variant	exon	0.919	0	1	-	-	Δ(E5q9); Δ(E4_E5)	96.6%; 1.5%	930-nt	0.019	complete	PTC: 3% Δ(E5); 3% Δ(E6q39_E7); 0.6% Δ(E5_E6) IF: 0.8% Δ(E3)	Δ(E5q9); Δ(E4_E5)	0	≤20	0.97	51694	criteria_provided,_conflicting_classifications	Conflicting_classifications_of_pathogenicity	Uncertain_significance(7)|Benign(1)|Likely_benign(6)	VUS	NO	SCV000072481|SCV000183850|SCV000210243|SCV000223762|SCV000267841|SCV000588067|SCV000600601|SCV000694795|SCV000903073|SCV001138962|SCV001157833|SCV002025870|SCV002065496|SCV005634392
30883759	BRCA2	NM_000059.4	NM_000059.4:c.470_474del	NP_000050.3:p.Lys157SerfsTer24	frameshift_variant,splice_region_variant	exon,splice_region	0.919	0.167	0.818	Δ(E5)	0.832	-	-	-	-	high	PTC: 3% Δ(E5); 3% Δ(E6q39_E7); 0.6% Δ(E5_E6) IF: 0.8% Δ(E3)	-	83.2	N/A (frameshift - DNA level)	0.38	51701	reviewed_by_expert_panel	Pathogenic	NA	P	NO	SCV000282394
30883759	BRCA2	NM_000059.4	NM_000059.4:c.475+1G>T	-	splice_donor_variant	intron,splice_donor	0.919	0	1	Δ(E5)	1	-	-	-	-	complete	PTC: 3% Δ(E5); 3% Δ(E6q39_E7); 0.6% Δ(E5_E6) IF: 0.8% Δ(E3)	-	100	≥80	0.98	51709	reviewed_by_expert_panel	Pathogenic	NA	P	YES	SCV001161654
30883759	BRCA2	NM_000059.4	NM_000059.4:c.475+3A>T	-	splice_donor_region_variant	intron,splice_region	0.919	0	1	Δ(E5); Δ(E5_E6)	96.8%; 3.2%	-	-	-	-	complete	PTC: 3% Δ(E5); 3% Δ(E6q39_E7); 0.6% Δ(E5_E6) IF: 0.8% Δ(E3)	-	100	≥80	0.82	126116	criteria_provided,_single_submitter	Pathogenic	NA	P	YES	SCV000327082
30883759	BRCA2	NM_000059.4	NM_000059.4:c.476-3C>A	-	splice_polypyrimidine_tract_variant	intron,splice_region	0.919	0.298	0.676	Δ(E5_E6); Δ(E6)	55.3%; 15%	-	-	-	-	intermediate	PTC: 3% Δ(E5); 3% Δ(E6q39_E7); 0.6% Δ(E5_E6) IF: 0.8% Δ(E3)	-	70.3	≥50 & <80	0.31	37924	criteria_provided,_multiple_submitters,_no_conflicts	Uncertain_significance	NA	VUS	NO	SCV001396566|SCV002635624|SCV004213704|SCV004361172|SCV004543895|SCV005903101|SCV005915542
30883759	BRCA2	NM_000059.4	NM_000059.4:c.476-2A>G	-	splice_acceptor_variant	intron,splice_acceptor	0.919	0	1	Δ(E5_E6); Δ(E6)	27.3%; 72.7%	-	-	-	-	complete	PTC: 3% Δ(E5); 3% Δ(E6q39_E7); 0.6% Δ(E5_E6) IF: 0.8% Δ(E3)	-	100	≥80	0.98	37923	reviewed_by_expert_panel	Pathogenic	NA	P	YES	SCV000244452
30883759	BRCA2	NM_000059.4	NM_000059.4:c.478G>A	NP_000050.3:p.Val160Ile	missense_variant	exon	0.919	1	-0.088	-	-	-	-	-	-	no aberration	PTC: 3% Δ(E5); 3% Δ(E6q39_E7); 0.6% Δ(E5_E6) IF: 0.8% Δ(E3)	-	0	≤20	0.01	1478387	criteria_provided,_multiple_submitters,_no_conflicts	Uncertain_significance	NA	VUS	NO	SCV002262870|SCV002634624
30883759	BRCA2	NM_000059.4	NM_000059.4:c.506A>G	NP_000050.3:p.Lys169Arg	missense_variant	exon	0.919	0.941	-0.024	Δ(E5); Δ(E6q39_E7)	1.9%; 3.0%	Δ(E3)	0.01	-	-	no aberration	PTC: 3% Δ(E5); 3% Δ(E6q39_E7); 0.6% Δ(E5_E6) IF: 0.8% Δ(E3)	-	5.9	≤20	0.12	37941	criteria_provided,_conflicting_classifications	Conflicting_classifications_of_pathogenicity	Uncertain_significance(2)|Benign(2)|Likely_benign(8)	B/LB	YES	SCV000072560|SCV000108617|SCV000183844|SCV000267730|SCV000600623|SCV000910662|SCV001266518|SCV001269104|SCV001361906|SCV002043114|SCV002533921|SCV003799533
30883759	BRCA2	NM_000059.4	NM_000059.4:c.508T>G	NP_000050.3:p.Phe170Val	missense_variant	exon	0.919	0.957	-0.041	Δ(E5); Δ(E6q39_E7)	1.7%; 2.6%	-	-	-	-	no aberration	PTC: 3% Δ(E5); 3% Δ(E6q39_E7); 0.6% Δ(E5_E6) IF: 0.8% Δ(E3)	-	4.3	≤20	0.02	479336	criteria_provided,_single_submitter	Uncertain_significance	NA	VUS	NO	SCV000661326
30883759	BRCA2	NM_000059.4	NM_000059.4:c.516+1G>T	-	splice_donor_variant	intron,splice_donor	0.919	0	1	Δ(E5_E6); Δ(E6)	14.8%; 85.2%	-	-	-	-	complete	PTC: 3% Δ(E5); 3% Δ(E6q39_E7); 0.6% Δ(E5_E6) IF: 0.8% Δ(E3)	-	100	≥80	0.98	267649	criteria_provided,_multiple_submitters,_no_conflicts	Pathogenic/Likely_pathogenic	NA	P/LP	YES	SCV000327149|SCV000743242|SCV000744384|SCV002239671|SCV002641351|SCV004848265|SCV006091022
30883759	BRCA2	NM_000059.4	NM_000059.4:c.516+2T>C	-	splice_donor_variant	intron,splice_donor	0.919	0	1	Δ(E5_E6); Δ(E6)	47.7%; 52.3%	-	-	-	-	complete	PTC: 3% Δ(E5); 3% Δ(E6q39_E7); 0.6% Δ(E5_E6) IF: 0.8% Δ(E3)	-	100	≥80	0.97	531315	criteria_provided,_single_submitter	Pathogenic	NA	P	YES	SCV000759014
30883759	BRCA2	NM_000059.4	NM_000059.4:c.517-2A>G	-	splice_acceptor_variant	intron,splice_acceptor	0.919	0	1	Δ(E7)	0.938	Δ(E7_E8)	0.038	651-nt	0.024	complete	PTC: 3% Δ(E5); 3% Δ(E6q39_E7); 0.6% Δ(E5_E6) IF: 0.8% Δ(E3)	Δ(E7_E8)	93.8	≥80	0.81	51801	reviewed_by_expert_panel	Pathogenic	NA	P	YES	SCV001161557
30883759	BRCA2	NM_000059.4	NM_000059.4:c.517-1G>A	-	splice_acceptor_variant	intron,splice_acceptor	0.919	0	1	Δ(E5); Δ(E7p1); Δ(E7)	2.1%; 84.6%; 11.1%	-	-	856-nt	0.022	complete	PTC: 3% Δ(E5); 3% Δ(E6q39_E7); 0.6% Δ(E5_E6) IF: 0.8% Δ(E3)	-	97.8	≥80	0.78	51800	criteria_provided,_multiple_submitters,_no_conflicts	Pathogenic	NA	P	YES	SCV000186912|SCV000296616|SCV000327156|SCV000838735|SCV001578220|SCV001814715|SCV004216042
30883759	BRCA2	NM_000059.4	NM_000059.4:c.517G>T	NP_000050.3:p.Gly173Cys	missense_variant,splice_region_variant	exon,splice_region	0.919	0	1	Δ(E7)	0.908	Δ(E7_E8)	0.064	651-nt	0.028	complete	PTC: 3% Δ(E5); 3% Δ(E6q39_E7); 0.6% Δ(E5_E6) IF: 0.8% Δ(E3)	Δ(E7_E8)	90.8	≥80	0.4	51805	criteria_provided,_conflicting_classifications	Conflicting_classifications_of_pathogenicity	Likely_pathogenic(2)|Uncertain_significance(2)	VUS	NO	SCV000273700|SCV000600629|SCV000683683|SCV001491167
30883759	BRCA2	NM_000059.4	NM_000059.4:c.572A>G	NP_000050.3:p.Asp191Gly	missense_variant	exon	0.919	0.149	0.838	Δ(E6q39_E7); Δ(E7q60)	1.4%; 83.6%	-	-	-	-	high	PTC: 3% Δ(E5); 3% Δ(E6q39_E7); 0.6% Δ(E5_E6) IF: 0.8% Δ(E3)	-	85	≥80	0.87	51920	criteria_provided,_conflicting_classifications	Conflicting_classifications_of_pathogenicity	Likely_pathogenic(1)|Uncertain_significance(1)	VUS	NO	SCV003853788|SCV004847903
30883759	BRCA2	NM_000059.4	NM_000059.4:c.599C>T	NP_000050.3:p.Thr200Ile	missense_variant	exon	0.919	0.904	0.016	-	-	-	-	872-nt; 834-nt	6.1%; 3.5%	low	PTC: 3% Δ(E5); 3% Δ(E6q39_E7); 0.6% Δ(E5_E6) IF: 0.8% Δ(E3)	-	0	≤20	0.17	140966	criteria_provided,_conflicting_classifications	Conflicting_classifications_of_pathogenicity	Uncertain_significance(5)|Likely_benign(6)	LB	YES	SCV000184012|SCV000218902|SCV000903814|SCV001805011|SCV002010345|SCV002555814|SCV004846794|SCV005045418|SCV005624476|SCV005902355|SCV006092344
30883759	BRCA2	NM_000059.4	NM_000059.4:c.606C>T	NP_000050.3:p.Pro202=	synonymous_variant	exon	0.919	0.9	0.021	Δ(E5); Δ(E6q39_E7)	5.7%; 3.1%	Δ(E3)	0.013	-	-	low	PTC: 3% Δ(E5); 3% Δ(E6q39_E7); 0.6% Δ(E5_E6) IF: 0.8% Δ(E3)	-	10.1	≤20	0.01	252412	reviewed_by_expert_panel	Likely_benign	NA	LB	YES	SCV000579193
30883759	BRCA2	NM_000059.4	NM_000059.4:c.620C>T	NP_000050.3:p.Thr207Ile	missense_variant	exon	0.919	0.781	0.15	Δ(E7)	0.219	-	-	-	-	low	PTC: 3% Δ(E5); 3% Δ(E6q39_E7); 0.6% Δ(E5_E6) IF: 0.8% Δ(E3)	-	21.9	>20 & <50	0.28	186155	criteria_provided,_multiple_submitters,_no_conflicts	Uncertain_significance	NA	VUS	NO	SCV000216436|SCV000279426|SCV000549716|SCV000889089|SCV000911793|SCV000916908|SCV002536210|SCV004213643|SCV005424253
30883759	BRCA2	NM_000059.4	NM_000059.4:c.627C>A	NP_000050.3:p.Leu209=	synonymous_variant	exon	0.919	0.959	-0.044	Δ(E5); Δ(E6q39_E7)	1.2%; 2.9%	-	-	-	-	no aberration	PTC: 3% Δ(E5); 3% Δ(E6q39_E7); 0.6% Δ(E5_E6) IF: 0.8% Δ(E3)	-	4.1	≤20	0.04	185119	reviewed_by_expert_panel	Likely_benign	NA	LB	YES	SCV000579195
30883759	BRCA2	NM_000059.4	NM_000059.4:c.627C>T	NP_000050.3:p.Leu209=	synonymous_variant	exon	0.919	0.965	-0.05	Δ(E6q39_E7)	0.035	-	-	-	-	no aberration	PTC: 3% Δ(E5); 3% Δ(E6q39_E7); 0.6% Δ(E5_E6) IF: 0.8% Δ(E3)	-	3.5	≤20	0.03	182278	reviewed_by_expert_panel	Likely_benign	NA	LB	YES	SCV000579140
30883759	BRCA2	NM_000059.4	NM_000059.4:c.631G>A	NP_000050.3:p.Val211Ile	missense_variant,splice_region_variant	exon,splice_region	0.919	0	1	Δ(E6q39_E7); Δ(E7)	4.5%; 91.0%	Δ(E7_E8)	0.028	742-nt	0.017	complete	PTC: 3% Δ(E5); 3% Δ(E6q39_E7); 0.6% Δ(E5_E6) IF: 0.8% Δ(E3)	Δ(E7_E8)	95.5	≥80	0.81	52058	criteria_provided,_multiple_submitters,_no_conflicts	Pathogenic	NA	P	NO	SCV000275759|SCV000279589|SCV000327389|SCV000683772|SCV000694962|SCV000838740|SCV001577033|SCV003810379|SCV004210543|SCV004220498
30883759	BRCA2	NM_000059.4	NM_000059.4:c.631+1G>A	-	splice_donor_variant	intron,splice_donor	0.919	0	1	Δ(E6q39_E7); Δ(E7)	8.7%; 91.3%	-	-	-	-	complete	PTC: 3% Δ(E5); 3% Δ(E6q39_E7); 0.6% Δ(E5_E6) IF: 0.8% Δ(E3)	-	100	≥80	0.82	9348	criteria_provided,_multiple_submitters,_no_conflicts	Pathogenic	NA	P	YES	SCV000072908|SCV000186906|SCV000327383|SCV001133860|SCV001362777|SCV001499760|SCV005078032
30883759	BRCA2	NM_000059.4	NM_000059.4:c.631+3A>G	-	splice_donor_region_variant	intron,splice_region	0.919	0.078	0.915	Δ(E7)	0.875	Δ(E7_E8)	0.047	-	-	high	PTC: 3% Δ(E5); 3% Δ(E6q39_E7); 0.6% Δ(E5_E6) IF: 0.8% Δ(E3)	Δ(E7_E8)	87.5	≥80	0.71	52054	criteria_provided,_multiple_submitters,_no_conflicts	Pathogenic/Likely_pathogenic	NA	P/LP	YES	SCV000072911|SCV000327386|SCV000661308|SCV004041262|SCV004825182|SCV005624492
30883759	BRCA2	NM_000059.4	NM_000059.4:c.632-3C>G	-	splice_polypyrimidine_tract_variant	intron,splice_region	0.919	0	1	[Δ(E6q39_E7)▼(E8p2)]; ▼(E8p2)	25.1%; 74.9%	-	-	-	-	complete	PTC: 3% Δ(E5); 3% Δ(E6q39_E7); 0.6% Δ(E5_E6) IF: 0.8% Δ(E3)	-	100	≥80	0.95	219896	reviewed_by_expert_panel	Likely_pathogenic	NA	LP	YES	SCV004101433
30883759	BRCA2	NM_000059.4	NM_000059.4:c.632-1G>C	-	splice_acceptor_variant	intron,splice_acceptor	0.919	0	1	Δ(E6q39_E8p4); Δ(E8p4)	30.9%; 67.9%	-	-	963-nt	0.012	complete	PTC: 3% Δ(E5); 3% Δ(E6q39_E7); 0.6% Δ(E5_E6) IF: 0.8% Δ(E3)	-	98.8	≥80	0.99	52061	no_assertion_criteria_provided	Pathogenic	NA	P	YES	SCV000147345
30883759	BRCA2	NM_000059.4	NM_000059.4:c.681+4A>G	-	splice_donor_region_variant	intron,splice_region	0.919	0	1	▼(E8q4)	0.927	Δ(E3)	0.018	971-nt; 868-nt	3.5%; 2.0%	complete	PTC: 3% Δ(E5); 3% Δ(E6q39_E7); 0.6% Δ(E5_E6) IF: 0.8% Δ(E3)	-	94.5	≥80	0.94	52193	criteria_provided,_multiple_submitters,_no_conflicts	Pathogenic/Likely_pathogenic	NA	P/LP	YES	SCV000327520|SCV000661243|SCV000694998|SCV001358249|SCV001484289|SCV005624516
30883759	BRCA2	NM_000059.4	NM_000059.4:c.682-1G>C	-	splice_acceptor_variant	intron,splice_acceptor	0.919	0	1	Δ(E9)	1	-	-	-	-	complete	PTC: 3% Δ(E5); 3% Δ(E6q39_E7); 0.6% Δ(E5_E6) IF: 0.8% Δ(E3)	-	100	≥80	1	52198	criteria_provided,_multiple_submitters,_no_conflicts	Pathogenic/Likely_pathogenic	NA	P/LP	YES	SCV000274334|SCV000887896|SCV001586456
30883759	BRCA2	NM_000059.4	NM_000059.4:c.709G>T	NP_000050.3:p.Asp237Tyr	missense_variant	exon	0.919	0.973	-0.059	Δ(E5)	0.027	-	-	-	-	no aberration	PTC: 3% Δ(E5); 3% Δ(E6q39_E7); 0.6% Δ(E5_E6) IF: 0.8% Δ(E3)	-	2.7	≤20	0.04	489779	criteria_provided,_single_submitter	Uncertain_significance	NA	VUS	NO	SCV000683852
30883759	BRCA2	NM_000059.4	NM_000059.4:c.741C>T	NP_000050.3:p.Ile247=	synonymous_variant	exon	0.919	0.928	-0.01	Δ(E5); Δ(E6q39_E7)	4.7%; 2.5%	-	-	-	-	no aberration	PTC: 3% Δ(E5); 3% Δ(E6q39_E7); 0.6% Δ(E5_E6) IF: 0.8% Δ(E3)	-	7.2	≤20	0.06	52324	reviewed_by_expert_panel	Likely_benign	NA	LB	YES	SCV000578735
30883759	BRCA2	NM_000059.4	NM_000059.4:c.746C>T	NP_000050.3:p.Ser249Phe	missense_variant	exon	0.919	1	-0.088	-	-	-	-	-	-	no aberration	PTC: 3% Δ(E5); 3% Δ(E6q39_E7); 0.6% Δ(E5_E6) IF: 0.8% Δ(E3)	-	0	≤20	0.17	2419919	criteria_provided,_multiple_submitters,_no_conflicts	Uncertain_significance	NA	VUS	NO	SCV003788420|SCV006207280
30883759	BRCA2	NM_000059.4	NM_000059.4:c.750G>A	NP_000050.3:p.Val250=	synonymous_variant	exon	0.919	1	-0.088	-	-	-	-	-	-	no aberration	PTC: 3% Δ(E5); 3% Δ(E6q39_E7); 0.6% Δ(E5_E6) IF: 0.8% Δ(E3)	-	0	≤20	0.02	135814	reviewed_by_expert_panel	Likely_benign	NA	LB	YES	SCV000578875
30883759	BRCA2	NM_000059.4	NM_000059.4:c.752C>G	NP_000050.3:p.Thr251Arg	missense_variant	exon	0.919	0.978	-0.064	Δ(E6q39_E7)	0.022	-	-	-	-	no aberration	PTC: 3% Δ(E5); 3% Δ(E6q39_E7); 0.6% Δ(E5_E6) IF: 0.8% Δ(E3)	-	2.2	≤20	0.05	141126	criteria_provided,_conflicting_classifications	Conflicting_classifications_of_pathogenicity	Uncertain_significance(7)|Likely_benign(1)	VUS	NO	SCV000184264|SCV000549535|SCV000683884|SCV000889131|SCV001437436|SCV001815377|SCV003932755|SCV004846819
30883759	BRCA2	NM_000059.4	NM_000059.4:c.756_757del	NP_000050.3:p.Asp252GlufsTer2	frameshift_variant	exon	0.919	0.956	-0.04	Δ(E5); Δ(E6q39_E7)	2.2%; 2.2%	-	-	-	-	no aberration	PTC: 3% Δ(E5); 3% Δ(E6q39_E7); 0.6% Δ(E5_E6) IF: 0.8% Δ(E3)	-	4.4	N/A (frameshift - DNA level)	0.04	38106	reviewed_by_expert_panel	Pathogenic	NA	P	NO	SCV000300356
30883759	BRCA2	NM_000059.4	NM_000059.4:c.772C>T	NP_000050.3:p.Gln258Ter	stop_gained	exon	0.919	0.978	-0.064	Δ(E6q39_E7)	0.022	-	-	-	-	no aberration	PTC: 3% Δ(E5); 3% Δ(E6q39_E7); 0.6% Δ(E5_E6) IF: 0.8% Δ(E3)	-	2.2	N/A (stop gained)	0.01	52395	reviewed_by_expert_panel	Pathogenic	NA	P	NO	SCV000300359
30883759	BRCA2	NM_000059.4	NM_000059.4:c.793+1G>T	-	splice_donor_variant	intron,splice_donor	0.919	0	1	Δ(E9)	0.951	-	-	854-nt; 744-nt	2.8%; 2.2%	complete	PTC: 3% Δ(E5); 3% Δ(E6q39_E7); 0.6% Δ(E5_E6) IF: 0.8% Δ(E3)	-	95.1	≥80	1	52438	criteria_provided,_multiple_submitters,_no_conflicts	Pathogenic/Likely_pathogenic	NA	P/LP	YES	SCV000327764|SCV000577944|SCV001189452|SCV004517313
31191615	BRCA2	NM_000059.4	NM_000059.4:c.7008-5T>C	-	splice_polypyrimidine_tract_variant	intron,splice_region	1	1	0	-	-	-	-	-	-	no aberration		-	0	≤20	0.12	38078	reviewed_by_expert_panel	Likely_benign	NA	LB	YES	SCV004101437
31191615	BRCA2	NM_000059.4	NM_000059.4:c.7008-2A>T	-	splice_acceptor_variant	intron,splice_acceptor	1	0	1	Δ(E14); Δ(E14p10)	11.9%; 88.1%	-	-	-	-	complete		-	100	≥80	0.97	52246	reviewed_by_expert_panel	Pathogenic	NA	P	YES	SCV000282248
31191615	BRCA2	NM_000059.4	NM_000059.4:c.7008-1G>A	-	splice_acceptor_variant	intron,splice_acceptor	1	0	1	Δ(E14); Δ(E14p10)	13.5%; 86.5%	-	-	-	-	complete		-	100	≥80	0.97	188436	reviewed_by_expert_panel	Pathogenic	NA	P	YES	SCV001161659
31191615	BRCA2	NM_000059.4	NM_000059.4:c.7009A>G	NP_000050.3:p.Thr2337Ala	missense_variant	exon	1	1	0	-	-	-	-	-	-	no aberration		-	0	≤20	0	96846	criteria_provided,_multiple_submitters,_no_conflicts	Uncertain_significance	NA	VUS	NO	SCV000215351|SCV003838831|SCV004220536|SCV004480748
31191615	BRCA2	NM_000059.4	NM_000059.4:c.7010C>T	NP_000050.3:p.Thr2337Ile	missense_variant	exon	1	1	0	-	-	-	-	-	-	no aberration		-	0	≤20	0.01	52248	criteria_provided,_multiple_submitters,_no_conflicts	Uncertain_significance	NA	VUS	NO	SCV000073133|SCV000185703|SCV000210412|SCV000600730|SCV000911244|SCV001554634|SCV002761559|SCV004844347|SCV005059026
31191615	BRCA2	NM_000059.4	NM_000059.4:c.7024C>T	NP_000050.3:p.Gln2342Ter	stop_gained	exon	1	1	0	-	-	-	-	-	-	no aberration		-	0	N/A (stop gained)	0.11	52250	reviewed_by_expert_panel	Pathogenic	NA	P	NO	SCV000301121
31191615	BRCA2	NM_000059.4	NM_000059.4:c.7030A>G	NP_000050.3:p.Ile2344Val	missense_variant	exon	1	1	0	-	-	-	-	-	-	no aberration		-	0	≤20	0.09	229840	criteria_provided,_multiple_submitters,_no_conflicts	Uncertain_significance	NA	VUS	NO	SCV000273190|SCV000549732|SCV000695017|SCV001339989|SCV002004019
31191615	BRCA2	NM_000059.4	NM_000059.4:c.7037A>G	NP_000050.3:p.Asn2346Ser	missense_variant	exon	1	1	0	-	-	-	-	-	-	no aberration		-	0	≤20	0.01	38080	criteria_provided,_single_submitter	Uncertain_significance	NA	VUS	NO	SCV000216241
31191615	BRCA2	NM_000059.4	NM_000059.4:c.7177A>G	NP_000050.3:p.Met2393Val	missense_variant	exon	1	0.952	0.048	-	-	Δ(E14p256)	0.015	942-nt	0.033	low		Δ(E14p256)	0	≤20	0.46	52277	criteria_provided,_multiple_submitters,_no_conflicts	Uncertain_significance	NA	VUS	NO	SCV000073167|SCV000216485|SCV000689033|SCV001773246|SCV004844368|SCV005625273
31191615	BRCA2	NM_000059.4	NM_000059.4:c.7180A>T	NP_000050.3:p.Arg2394Ter	stop_gained	exon	1	1	0	-	-	-	-	-	-	no aberration		-	0	N/A (stop gained)	0.01	52279	reviewed_by_expert_panel	Pathogenic	NA	P	NO	SCV000301138
31191615	BRCA2	NM_000059.4	NM_000059.4:c.7182A>G	NP_000050.3:p.Arg2394=	synonymous_variant	exon	1	1	0	-	-	-	-	-	-	no aberration		-	0	≤20	0.01	52280	reviewed_by_expert_panel	Likely_benign	NA	LB	YES	SCV000578666
31191615	BRCA2	NM_000059.4	NM_000059.4:c.7266T>A	NP_000050.3:p.Cys2422Ter	stop_gained	exon	1	1	0	-	-	-	-	-	-	no aberration		-	0	N/A (stop gained)	0.1	183185	reviewed_by_expert_panel	Pathogenic	NA	P	NO	SCV000301150
31191615	BRCA2	NM_000059.4	NM_000059.4:c.7294A>G	NP_000050.3:p.Arg2432Gly	missense_variant	exon	1	1	0	-	-	-	-	-	-	no aberration		-	0	≤20	0.01	479306	criteria_provided,_multiple_submitters,_no_conflicts	Uncertain_significance	NA	VUS	NO	SCV000661273|SCV000916922|SCV001340208|SCV002227112|SCV004844390
31191615	BRCA2	NM_000059.4	NM_000059.4:c.7296A>G	NP_000050.3:p.Arg2432=	synonymous_variant	exon	1	1	0	-	-	-	-	-	-	no aberration		-	0	≤20	0.01	391335	criteria_provided,_multiple_submitters,_no_conflicts	Likely_benign	NA	LB	YES	SCV000534387|SCV001350769|SCV002669227
31191615	BRCA2	NM_000059.4	NM_000059.4:c.7330G>T	NP_000050.3:p.Asp2444Tyr	missense_variant	exon	1	1	0	-	-	-	-	-	-	no aberration		-	0	≤20	0	91474	no_assertion_criteria_provided	Uncertain_significance	NA	VUS	NO	SCV000108788
31191615	BRCA2	NM_000059.4	NM_000059.4:c.7339A>G	NP_000050.3:p.Asn2447Asp	missense_variant	exon	1	1	0	-	-	-	-	-	-	no aberration		-	0	≤20	0	185933	criteria_provided,_multiple_submitters,_no_conflicts	Uncertain_significance	NA	VUS	NO	SCV000216168|SCV000549659|SCV001469708|SCV002601536|SCV005059097|SCV005394945|SCV006061864
31191615	BRCA2	NM_000059.4	NM_000059.4:c.7397T>C	NP_000050.3:p.Val2466Ala	missense_variant	exon	1	1	0	-	-	-	-	-	-	no aberration		-	0	≤20	0.01	133738	criteria_provided,_multiple_submitters,_no_conflicts	Benign	NA	B	YES	SCV000202300|SCV000268811|SCV000602752|SCV001000149|SCV001139178|SCV002025816|SCV002097591|SCV004844403|SCV005236526|SCV006311479
31191615	BRCA2	NM_000059.4	NM_000059.4:c.7418G>A	NP_000050.3:p.Cys2473Tyr	missense_variant	exon	1	1	0	-	-	-	-	-	-	no aberration		-	0	≤20	0.03	52323	criteria_provided,_conflicting_classifications	Conflicting_classifications_of_pathogenicity	Uncertain_significance(5)|Likely_benign(2)	VUS	NO	SCV000187144|SCV000906935|SCV001360797|SCV001469712|SCV001666511|SCV001814966|SCV005425747
31191615	BRCA2	NM_000059.4	NM_000059.4:c.7428A>G	NP_000050.3:p.Glu2476=	synonymous_variant	exon	1	1	0	-	-	-	-	-	-	no aberration		-	0	≤20	0.01	2774942	criteria_provided,_multiple_submitters,_no_conflicts	Likely_benign	NA	LB	YES	SCV004362206|SCV005097521|SCV005817898
31191615	BRCA2	NM_000059.4	NM_000059.4:c.7435+1G>C	-	splice_donor_variant	intron,splice_donor	1	0	1	▼(E14q5)	1	-	-	-	-	complete		-	100	≥80	0.99	267678	criteria_provided,_single_submitter	Pathogenic	NA	P	YES	SCV000327656
31191615	BRCA2	NM_000059.4	NM_000059.4:c.7435+3A>G	-	splice_donor_region_variant	intron,splice_region	1	1	0	-	-	-	-	-	-	no aberration		-	0	≤20	0.41	234911	criteria_provided,_multiple_submitters,_no_conflicts	Uncertain_significance	NA	VUS	NO	SCV000279998|SCV000549821
31191615	BRCA2	NM_000059.4	NM_000059.4:c.7435+5T>C	-	splice_donor_region_variant	intron,splice_region	1	1	0	-	-	-	-	-	-	no aberration		-	0	≤20	0.02	231148	criteria_provided,_conflicting_classifications	Conflicting_classifications_of_pathogenicity	Uncertain_significance(4)|Likely_benign(1)	VUS	NO	SCV000274905|SCV000296522|SCV000635575|SCV002556968|SCV003838173
31191615	BRCA2	NM_000059.4	NM_000059.4:c.7435+6G>A	-	splice_donor_region_variant	intron,splice_region	1	1	0	-	-	-	-	-	-	no aberration		-	0	≤20	0.05	38096	criteria_provided,_conflicting_classifications	Conflicting_classifications_of_pathogenicity	Uncertain_significance(2)|Benign(8)|Likely_benign(8)	B/LB	YES	SCV000073224|SCV000167393|SCV000219392|SCV000267022|SCV000593729|SCV000600749|SCV000683872|SCV000803156|SCV001139179|SCV001746175|SCV002025817|SCV002515145|SCV002531856|SCV002672571|SCV004014896|SCV004027472|SCV006079558|SCV006324793
31191615	BRCA2	NM_000059.4	NM_000059.4:c.7435+7T>G	-	intron_variant	intron	1	1	0	-	-	-	-	-	-	no aberration		-	0	≤20	0.05	236902	criteria_provided,_single_submitter	Likely_benign	NA	LB	YES	SCV001685151
31191615	BRCA2	NM_000059.4	NM_000059.4:c.7435+10G>A	-	intron_variant	intron	1	1	0	-	-	-	-	-	-	no aberration		-	0	≤20	0.04	52327	criteria_provided,_conflicting_classifications	Conflicting_classifications_of_pathogenicity	Uncertain_significance(2)|Benign(2)|Likely_benign(3)	B/LB	YES	SCV000073223|SCV000383766|SCV000383767|SCV000512385|SCV000683870|SCV002046106|SCV002572473
31191615	BRCA2	NM_000059.4	NM_000059.4:c.7436-14T>G	-	splice_polypyrimidine_tract_variant	intron,splice_region	1	1	0	-	-	-	-	-	-	no aberration		-	0	≤20	0.02	52328	criteria_provided,_multiple_submitters,_no_conflicts	Likely_benign	NA	LB	YES	SCV000073225|SCV000695065|SCV000715343|SCV000903527|SCV004822644
31191615	BRCA2	NM_000059.4	NM_000059.4:c.7436-4A>G	-	splice_polypyrimidine_tract_variant	intron,splice_region	1	1	0	-	-	-	-	-	-	no aberration		-	0	≤20	0.01	38097	criteria_provided,_conflicting_classifications	Conflicting_classifications_of_pathogenicity	Uncertain_significance(1)|Benign(1)|Likely_benign(9)	B/LB	YES	SCV000073228|SCV000210421|SCV000215452|SCV000219393|SCV000600750|SCV000695067|SCV000910822|SCV002048424|SCV002531857|SCV002551502|SCV004834180
31191615	BRCA2	NM_000059.4	NM_000059.4:c.7436-4A>T	-	splice_polypyrimidine_tract_variant	intron,splice_region	1	1	0	-	-	-	-	-	-	no aberration		-	0	≤20	0.01	462438	criteria_provided,_multiple_submitters,_no_conflicts	Likely_benign	NA	LB	YES	SCV000635576|SCV002670286
31191615	BRCA2	NM_000059.4	NM_000059.4:c.7436-2A>T	-	splice_acceptor_variant	intron,splice_acceptor	1	0	1	Δ(E15p13)	1	-	-	-	-	complete		-	100	≥80	0.95	52330	criteria_provided,_multiple_submitters,_no_conflicts	Pathogenic/Likely_pathogenic	NA	P/LP	YES	SCV000327662|SCV000695066|SCV000731718|SCV001344650|SCV002581715|SCV006480503
31191615	BRCA2	NM_000059.4	NM_000059.4:c.7436-1G>A	-	splice_acceptor_variant	intron,splice_acceptor	1	0	1	Δ(E15p13); Δ(E15p83)	96.3%; 3.7%	-	-	-	-	complete		-	100	≥80	0.95	1758903	criteria_provided,_multiple_submitters,_no_conflicts	Pathogenic/Likely_pathogenic	NA	P/LP	YES	SCV002670285|SCV005832087|SCV006311496
31191615	BRCA2	NM_000059.4	NM_000059.4:c.7447A>G	NP_000050.3:p.Ser2483Gly	missense_variant	exon	1	0.899	0.101	-	-	Δ(E15p12)	0.101	-	-	low		Δ(E15p12)	0	≤20	0.51	52334	criteria_provided,_multiple_submitters,_no_conflicts	Uncertain_significance	NA	VUS	NO	SCV000215595|SCV000279489|SCV000889125|SCV000896361|SCV001359212|SCV001511368|SCV001737761|SCV004213693|SCV004844406|SCV005882726|SCV006099501
31191615	BRCA2	NM_000059.4	NM_000059.4:c.7466A>G	NP_000050.3:p.Asp2489Gly	missense_variant	exon	1	1	0	-	-	-	-	-	-	no aberration		-	0	≤20	0.02	38098	criteria_provided,_conflicting_classifications	Conflicting_classifications_of_pathogenicity	Uncertain_significance(7)|Likely_benign(1)	VUS	NO	SCV000186815|SCV000210425|SCV000683875|SCV001360690|SCV001489515|SCV004844409|SCV005059190|SCV006277600
31191615	BRCA2	NM_000059.4	NM_000059.4:c.7467T>C	NP_000050.3:p.Asp2489=	synonymous_variant	exon	1	1	0	-	-	-	-	-	-	no aberration		-	0	≤20	0.06	2719609	criteria_provided,_multiple_submitters,_no_conflicts	Likely_benign	NA	LB	YES	SCV004274279|SCV005917611|SCV006482301
31191615	BRCA2	NM_000059.4	NM_000059.4:c.7471del	NP_000050.3:p.Gln2491ArgfsTer33	frameshift_variant	exon	1	1	0	-	-	-	-	-	-	no aberration		-	0	N/A (frameshift - DNA level)	0.04	254606	reviewed_by_expert_panel	Pathogenic	NA	P	NO	SCV000301168
31191615	BRCA2	NM_000059.4	NM_000059.4:c.7471C>T	NP_000050.3:p.Gln2491Ter	stop_gained	exon	1	1	0	-	-	-	-	-	-	no aberration		-	0	N/A (stop gained)	0.17	52339	reviewed_by_expert_panel	Pathogenic	NA	P	NO	SCV000301167
31191615	BRCA2	NM_000059.4	NM_000059.4:c.7472A>G	NP_000050.3:p.Gln2491Arg	missense_variant	exon	1	1	0	-	-	-	-	-	-	no aberration		-	0	≤20	0.03	479282	criteria_provided,_conflicting_classifications	Conflicting_classifications_of_pathogenicity	Uncertain_significance(3)|Likely_benign(1)	VUS	NO	SCV000661192|SCV000918995|SCV000959745|SCV004035526
31191615	BRCA2	NM_000059.4	NM_000059.4:c.7474_7475del	NP_000050.3:p.Asp2492TyrfsTer4	frameshift_variant	exon	1	1	0	-	-	-	-	-	-	no aberration		-	0	N/A (frameshift - DNA level)	0.05	52340	reviewed_by_expert_panel	Pathogenic	NA	P	NO	SCV000301169
31191615	BRCA2	NM_000059.4	NM_000059.4:c.7501C>T	NP_000050.3:p.Gln2501Ter	stop_gained	exon	1	0.84	0.16	Δ(E15p83)	0.16	-	-	-	-	low		-	16	N/A (stop gained)	0.33	267015	reviewed_by_expert_panel	Pathogenic	NA	P	NO	SCV000324558
31191615	BRCA2	NM_000059.4	NM_000059.4:c.7544C>T	NP_000050.3:p.Thr2515Ile	missense_variant	exon	1	1	0	-	-	-	-	-	-	no aberration		-	0	≤20	0.04	38102	reviewed_by_expert_panel	Benign	NA	B	YES	SCV000244473
31191615	BRCA2	NM_000059.4	NM_000059.4:c.7601C>T	NP_000050.3:p.Ala2534Val	missense_variant	exon	1	1	0	-	-	-	-	-	-	no aberration		-	0	≤20	0.11	38109	criteria_provided,_conflicting_classifications	Conflicting_classifications_of_pathogenicity	Uncertain_significance(1)|Benign(1)|Likely_benign(6)	B/LB	YES	SCV000073269|SCV000210430|SCV000273906|SCV000695084|SCV000889135|SCV000911016|SCV001148991|SCV002551557
31191615	BRCA2	NM_000059.4	NM_000059.4:c.7617G>A	NP_000050.3:p.Gln2539=	splice_region_variant,synonymous_variant	exon,splice_region	1	1	0	-	-	-	-	-	-	no aberration		-	0	≤20	0.55	1330029	criteria_provided,_multiple_submitters,_no_conflicts	Uncertain_significance	NA	VUS	NO	SCV002046432|SCV002266025
31191615	BRCA2	NM_000059.4	NM_000059.4:c.7617+1G>A	-	splice_donor_variant	intron,splice_donor	1	0	1	Δ(E15)	1	-	-	-	-	complete		-	100	≥80	0.98	52362	reviewed_by_expert_panel	Pathogenic	NA	P	YES	SCV000282250
31191615	BRCA2	NM_000059.4	NM_000059.4:c.7617+1G>T	-	splice_donor_variant	intron,splice_donor	1	0	1	Δ(E15)	1	-	-	-	-	complete		-	100	≥80	0.98	52363	criteria_provided,_multiple_submitters,_no_conflicts	Pathogenic	NA	P	YES	SCV000327693|SCV000693581|SCV000743334|SCV000744523|SCV001358604|SCV001442676|SCV001578735|SCV002671857|SCV006108462|SCV006276977
31191615	BRCA2	NM_000059.4	NM_000059.4:c.7617+2T>G	-	splice_donor_variant	intron,splice_donor	1	0	1	Δ(E15)	1	-	-	-	-	complete		-	100	≥80	0.98	52364	reviewed_by_expert_panel	Pathogenic	NA	P	YES	SCV001161562
29881398	BRCA2	NM_000059.4	NM_000059.4:c.7618-2A>G	-	splice_acceptor_variant	intron,splice_acceptor	1	0	1	∆(E16p44)	0.972	-	-	954-nt	0.028	complete		-	97.2	≥80	0.99	267684	reviewed_by_expert_panel	Pathogenic	NA	P	YES	SCV001161660
29881398	BRCA2	NM_000059.4	NM_000059.4:c.7618-2A>T	-	splice_acceptor_variant	intron,splice_acceptor	1	0	1	∆(E16); ∆(E16p44); ∆(E16p55)	1.3%; 96.9%; 1.8%	-	-	-	-	complete		-	100	≥80	0.99	2584170	criteria_provided,_single_submitter	Pathogenic	NA	P	YES	SCV004043402
29881398	BRCA2	NM_000059.4	NM_000059.4:c.7618-1G>A	-	splice_acceptor_variant	intron,splice_acceptor	1	0	1	∆(E16); ∆(E16p44); ∆(E16p55); ∆(E16_E17p69)	0.7%; 91.5%; 4.7%; 1.4%	∆(E16p93)	0.017	-	-	complete		∆(E16p93)	98.3	≥80	0.99	38110	reviewed_by_expert_panel	Pathogenic	NA	P	YES	SCV000244474
29881398	BRCA2	NM_000059.4	NM_000059.4:c.7618-1G>C	-	splice_acceptor_variant	intron,splice_acceptor	1	0	1	∆(E16); ∆(E16p44); ∆(E16p55); ∆(E16_E17p69)	2.8%; 92.6%; 1.9%; 0.9%	∆(E16p93)	0.011	893-nt	0.007	complete		∆(E16p93)	98.2	≥80	0.99	52368	criteria_provided,_single_submitter	Likely_pathogenic	NA	LP	YES	SCV005395899
29881398	BRCA2	NM_000059.4	NM_000059.4:c.7625C>G	NP_000050.3:p.Thr2542Arg	missense_variant	exon	1	1	0	-	-	-	-	-	-	no aberration		-	0	≤20	0.1	52371	criteria_provided,_single_submitter	Benign	NA	B	YES	SCV005102204
29881398	BRCA2	NM_000059.4	NM_000059.4:c.7738C>T	NP_000050.3:p.Gln2580Ter	stop_gained	exon	1	1	0	-	-	-	-	-	-	no aberration		-	0	N/A (stop gained)	0.18	52396	reviewed_by_expert_panel	Pathogenic	NA	P	NO	SCV000301199
29881398	BRCA2	NM_000059.4	NM_000059.4:c.7753G>A	NP_000050.3:p.Gly2585Arg	missense_variant	exon	1	1	0	-	-	-	-	-	-	no aberration		-	0	≤20	0.16	52400	criteria_provided,_conflicting_classifications	Conflicting_classifications_of_pathogenicity	Likely_pathogenic(5)|Uncertain_significance(2)	LP	NO	SCV000210445|SCV000605692|SCV000906940|SCV001478286|SCV002010323|SCV004538956|SCV005981134
29881398	BRCA2	NM_000059.4	NM_000059.4:c.7772A>G	NP_000050.3:p.Asn2591Ser	missense_variant	exon	1	1	0	-	-	-	-	-	-	no aberration		-	0	≤20	0.04	52407	criteria_provided,_conflicting_classifications	Conflicting_classifications_of_pathogenicity	Uncertain_significance(5)|Likely_benign(1)	VUS	NO	SCV000265961|SCV000803158|SCV001189247|SCV001535458|SCV002531883|SCV002556187
29881398	BRCA2	NM_000059.4	NM_000059.4:c.7802A>G	NP_000050.3:p.Tyr2601Cys	missense_variant	exon	1	0.543	0.457	Δ(E16q4)	0.457	-	-	-	-	intermediate		-	45.7	>20 & <50	0.93	185651	criteria_provided,_multiple_submitters,_no_conflicts	Likely_pathogenic	NA	LP	NO	SCV000215814|SCV000283325
29881398	BRCA2	NM_000059.4	NM_000059.4:c.7805G>C	NP_000050.3:p.Arg2602Thr	missense_variant,splice_region_variant	exon,splice_region	1	0	1	∆(E16); ∆(E16q100); ▼(E16q20); ∆(E16_E17p69)	77.6%; 14.4%; 6.5%; 1.5%	-	-	-	-	complete		-	100	≥80	0.92	52415	criteria_provided,_single_submitter	Pathogenic	NA	P	NO	SCV000327735
29881398	BRCA2	NM_000059.4	NM_000059.4:c.7805+1G>A	-	splice_donor_variant	intron,splice_donor	1	0	1	∆(E16); ∆(E16q100); ∆(E16_E17p69)	88%; 10.1%; 1.9%	-	-	-	-	complete		-	100	≥80	0.98	52410	criteria_provided,_multiple_submitters,_no_conflicts	Pathogenic	NA	P	YES	SCV000073326|SCV000296831|SCV000327732|SCV000665944|SCV000906942|SCV004210356|SCV004842562
29881398	BRCA2	NM_000059.4	NM_000059.4:c.7805+3A>C	-	splice_donor_region_variant	intron,splice_region	1	0.076	0.924	∆(E16); ∆(E16q100); ▼(E16q20)	75.3%; 13.3%; 3.8%	-	-	-	-	high		-	92.4	≥80	0.82	52411	reviewed_by_expert_panel	Likely_pathogenic	NA	LP	YES	SCV006310888
28339459	BRCA2	NM_000059.4	NM_000059.4:c.7806-40A>G	-	intron_variant	intron	1	1	0	-	-	-	-	-	-	no aberration		-	0	≤20	0	52419	reviewed_by_expert_panel	Benign	NA	B	YES	SCV004101439
28339459	BRCA2	NM_000059.4	NM_000059.4:c.7806-9T>G	-	splice_polypyrimidine_tract_variant	intron,splice_region	1	0	1	▼(E17p8)	0.363	Δ(E17); Δ(E17p69)	41.5%; 22.2%	-	-	complete		-	100	≥80	0.96	52420	criteria_provided,_multiple_submitters,_no_conflicts	Pathogenic	NA	P	YES	SCV000327741|SCV004296241|SCV006196624
28339459	BRCA2	NM_000059.4	NM_000059.4:c.7806-2A>G	-	splice_acceptor_variant	intron,splice_acceptor	1	0	1	∆(E17p20)	0.518	Δ(E17); ∆(E17p69)	20.1%; 28.1%	-	-	complete		-	100	≥80	0.97	52418	reviewed_by_expert_panel	Pathogenic	NA	P	YES	SCV001161563
28339459	BRCA2	NM_000059.4	NM_000059.4:c.7806-1G>A	-	splice_acceptor_variant	intron,splice_acceptor	1	0	1	∆(E17p1)	1	-	-	-	-	complete		-	100	≥80	0.97	619652	criteria_provided,_multiple_submitters,_no_conflicts	Pathogenic	NA	P	YES	SCV000887926|SCV001189290|SCV004296242
28339459	BRCA2	NM_000059.4	NM_000059.4:c.7806-1G>T	-	splice_acceptor_variant	intron,splice_acceptor	1	0	1	∆(E17p20)	1	-	-	-	-	complete		-	100	≥80	0.97	52417	criteria_provided,_multiple_submitters,_no_conflicts	Pathogenic	NA	P	YES	SCV000327738|SCV000689069|SCV000744527|SCV000916957|SCV001470447|SCV001581997|SCV002674746|SCV005374651
28339459	BRCA2	NM_000059.4	NM_000059.4:c.7806-2_7806-1dup	-	splice_acceptor_variant,splice_polypyrimidine_tract_variant	intron,splice_acceptor,splice_region	1	0	1	▼(E17p2) [2nt insertion due to duplication]	0.926	Δ(E17); Δ(E17p69)	5.1%; 2.3%	-	-	complete		-	100	≥80	0.96	812555	reviewed_by_expert_panel	Pathogenic	NA	P	YES	SCV001161661
28339459	BRCA2	NM_000059.4	NM_000059.4:c.7819A>C	NP_000050.3:p.Thr2607Pro	missense_variant	exon	1	1	0	-	-	-	-	-	-	no aberration		-	0	≤20	0.01	52422	criteria_provided,_conflicting_classifications	Conflicting_classifications_of_pathogenicity	Likely_pathogenic(1)|Uncertain_significance(1)	VUS	NO	SCV000073338|SCV002669569
28339459	BRCA2	NM_000059.4	NM_000059.4:c.7875A>G	NP_000050.3:p.Arg2625=	synonymous_variant	exon	1	0.953	0.047	-	-	Δ(E17p69)	0.047	-	-	low		-	4.7	≤20	0.39	1086635	criteria_provided,_conflicting_classifications	Conflicting_classifications_of_pathogenicity	Uncertain_significance(1)|Likely_benign(2)	LB	NO - excluded after review: VUS	SCV001606346|SCV002551635|SCV002680857
28339459	BRCA2	NM_000059.4	NM_000059.4:c.7940T>C	NP_000050.3:p.Leu2647Pro	missense_variant	exon	1	1	0	-	-	-	-	-	-	no aberration		-	0	≤20	0.02	52443	criteria_provided,_multiple_submitters,_no_conflicts	Pathogenic/Likely_pathogenic	NA	P/LP	NO	SCV000212960|SCV000567765|SCV000906945|SCV001577478|SCV004121070|SCV005625301
28339459	BRCA2	NM_000059.4	NM_000059.4:c.7947A>G	NP_000050.3:p.Pro2649=	synonymous_variant	exon	1	1	0	-	-	-	-	-	-	no aberration		-	0	≤20	0.04	52445	reviewed_by_expert_panel	Likely_benign	NA	LB	YES	SCV000578927
28339459	BRCA2	NM_000059.4	NM_000059.4:c.7971A>G	NP_000050.3:p.Lys2657=	synonymous_variant	exon	1	1	0	-	-	-	-	-	-	no aberration		-	0	≤20	0.1	215618	reviewed_by_expert_panel	Likely_benign	NA	LB	YES	SCV000579096
28339459	BRCA2	NM_000059.4	NM_000059.4:c.7975A>G	NP_000050.3:p.Arg2659Gly	missense_variant,splice_region_variant	exon,splice_region	1	0.738	0.262	-	-	Δ(E17)	0.262	-	-	intermediate		-	26.2	>20 & <50	0.51	38130	reviewed_by_expert_panel	Pathogenic	NA	P	NO	SCV001161662
28339459	BRCA2	NM_000059.4	NM_000059.4:c.7976G>A	NP_000050.3:p.Arg2659Lys	missense_variant,splice_region_variant	exon,splice_region	1	0	1	-	-	Δ(E17)	1	-	-	complete		-	100	≥80	0.82	38131	criteria_provided,_multiple_submitters,_no_conflicts	Pathogenic/Likely_pathogenic	NA	P/LP	NO	SCV000073379|SCV000186723|SCV000210454|SCV000292161|SCV000296757|SCV000327779|SCV000586979|SCV000693583|SCV000695112|SCV000744528|SCV001449881|SCV002010320|SCV002531895|SCV003810521|SCV004022481|SCV004211904|SCV004226665|SCV004243067|SCV004700962|SCV005199827
28339459	BRCA2	NM_000059.4	NM_000059.4:c.7976G>C	NP_000050.3:p.Arg2659Thr	missense_variant,splice_region_variant	exon,splice_region	1	0	1	-	-	Δ(E17)	1	-	-	complete		-	100	≥80	0.88	52455	reviewed_by_expert_panel	Pathogenic	NA	P	NO	SCV000244477
28339459	BRCA2	NM_000059.4	NM_000059.4:c.7976+1G>A	-	splice_donor_variant	intron,splice_donor	1	0	1	-	-	Δ(E17)	1	-	-	complete		-	100	≥80	0.93	52452	reviewed_by_expert_panel	Pathogenic	NA	P	YES	SCV001161564
28339459	BRCA2	NM_000059.4	NM_000059.4:c.7976+35C>A	-	intron_variant	intron	1	1	0	-	-	-	-	-	-	no aberration		-	0	≤20	0.01	433821	criteria_provided,_multiple_submitters,_no_conflicts	Likely_benign	NA	LB	YES	SCV000592163|SCV002551679|SCV005215526
28339459	BRCA2	NM_000059.4	NM_000059.4:c.7977-7C>G	-	splice_polypyrimidine_tract_variant	intron,splice_region	1	0	1	Δ(E18)	0.216	▼(E18p6)	0.784	-	-	complete		▼(E18p6)	21.6	>20 & <50	0.98	4215214	criteria_provided,_single_submitter	Uncertain_significance	NA	VUS	NO	SCV006482292
28339459	BRCA2	NM_000059.4	NM_000059.4:c.7977-6T>G	-	splice_polypyrimidine_tract_variant	intron,splice_region	1	0.667	0.333	Δ(E18); Δ(E18p191)	31.0%; 2.3%	-	-	-	-	intermediate		-	33.3	>20 & <50	0.03	1407571	criteria_provided,_single_submitter	Uncertain_significance	NA	VUS	NO	SCV002177691
28339459	BRCA2	NM_000059.4	NM_000059.4:c.7977-2A>T	-	splice_acceptor_variant	intron,splice_acceptor	1	0	1	Δ(E18); Δ(E18p191)	93.3%; 6.7%	-	-	-	-	complete		-	100	≥80	0.98	126164	criteria_provided,_single_submitter	Pathogenic	NA	P	YES	SCV000327782
28339459	BRCA2	NM_000059.4	NM_000059.4:c.7977-1G>C	-	splice_acceptor_variant	intron,splice_acceptor	1	0	1	Δ(E18); Δ(E18p191)	89.8%; 10.2%	-	-	-	-	complete		-	100	≥80	0.95	38132	reviewed_by_expert_panel	Pathogenic	NA	P	YES	SCV004101453
28339459	BRCA2	NM_000059.4	NM_000059.4:c.7977-1G>T	-	splice_acceptor_variant	intron,splice_acceptor	1	0	1	Δ(E18); Δ(E18p191); Δ(E18p236)	91.5%; 7.0%; 1.5%	-	-	-	-	complete		-	100	≥80	0.98	126163	criteria_provided,_multiple_submitters,_no_conflicts	Pathogenic/Likely_pathogenic	NA	P/LP	YES	SCV000253757|SCV000683927|SCV004060668
28339459	BRCA2	NM_000059.4	NM_000059.4:c.7984dupA	NP_000050.3:p.Thr2662AsnfsTer4	frameshift_variant	exon	1	1	0	-	-	-	-	-	-	no aberration		-	0	N/A (frameshift - DNA level)	0.01	267046	reviewed_by_expert_panel	Pathogenic	NA	P	NO	SCV000324605
28339459	BRCA2	NM_000059.4	NM_000059.4:c.7985C>G	NP_000050.3:p.Thr2662Arg	missense_variant	exon	1	0	1	Δ(E18); Δ(E18p191)	90.2%; 5.0%	-	-	other	0.048	complete		-	95.2	≥80	0.23	2736008	criteria_provided,_single_submitter	Uncertain_significance	NA	VUS	NO	SCV004296246
28339459	BRCA2	NM_000059.4	NM_000059.4:c.7985C>T	NP_000050.3:p.Thr2662Met	missense_variant	exon	1	0.967	0.033	Δ(E18)	0.033	-	-	-	-	low		-	3.3	≤20	0.01	184089	criteria_provided,_conflicting_classifications	Conflicting_classifications_of_pathogenicity	Uncertain_significance(5)|Benign(2)|Likely_benign(4)	B/LB	YES	SCV000213736|SCV000279209|SCV000549530|SCV000695115|SCV000821947|SCV000903146|SCV001139200|SCV001470450|SCV002030320|SCV005903102|SCV005917624
28339459	BRCA2	NM_000059.4	NM_000059.4:c.7988A>T	NP_000050.3:p.Glu2663Val	missense_variant	exon	1	0.842	0.158	Δ(E18)	0.086	-	-	other	0.072	low		-	8.6	≤20	0.03	52462	reviewed_by_expert_panel	Pathogenic	NA	P	NO	SCV000244478
28339459	BRCA2	NM_000059.4	NM_000059.4:c.7992T>A	NP_000050.3:p.Ile2664=	synonymous_variant	exon	1	0.686	0.314	Δ(E18)	0.314	-	-	-	-	intermediate		-	31.4	>20 & <50	0.02	52463	reviewed_by_expert_panel	Likely_benign	NA	LB	YES	SCV000579007
28339459	BRCA2	NM_000059.4	NM_000059.4:c.8007A>G	NP_000050.3:p.Arg2669=	synonymous_variant	exon	1	0.848	0.152	Δ(E18)	0.152	-	-	-	-	low		-	15.2	≤20	0.04	188439	criteria_provided,_conflicting_classifications	Conflicting_classifications_of_pathogenicity	Uncertain_significance(5)|Benign(1)|Likely_benign(4)	VUS	NO	SCV000283329|SCV000665951|SCV000695119|SCV000903268|SCV001945430|SCV002531902|SCV004220583|SCV004845587|SCV005090055|SCV005917626
28339459	BRCA2	NM_000059.4	NM_000059.4:c.8009C>A	NP_000050.3:p.Ser2670Ter	stop_gained	exon	1	0.04	0.96	Δ(E18); Δ(E18p191)	91.2%; 4.8%	-	-	-	-	high		-	96	N/A (stop gained)	0.18	52470	reviewed_by_expert_panel	Pathogenic	NA	P	NO	SCV000324610
28339459	BRCA2	NM_000059.4	NM_000059.4:c.8009C>G	NP_000050.3:p.Ser2670Trp	missense_variant	exon	1	0.799	0.201	Δ(E18)	0.201	-	-	-	-	intermediate		-	20.1	>20 & <50	0.03	489785	criteria_provided,_conflicting_classifications	Conflicting_classifications_of_pathogenicity	Pathogenic(1)|Likely_pathogenic(4)|Uncertain_significance(1)	P/LP	NO	SCV000683934|SCV001384598|SCV004703689|SCV005030332|SCV005184350|SCV006311080
28339459	BRCA2	NM_000059.4	NM_000059.4:c.8009C>T	NP_000050.3:p.Ser2670Leu	missense_variant	exon	1	0.766	0.234	Δ(E18)	0.234	-	-	-	-	intermediate		-	23.4	>20 & <50	0.02	52471	criteria_provided,_multiple_submitters,_no_conflicts	Pathogenic/Likely_pathogenic	NA	P/LP	NO	SCV000073398|SCV000186012|SCV000210458|SCV000484655|SCV000683935|SCV000889147|SCV001426773|SCV001478293|SCV002010319|SCV002518606|SCV002810379|SCV003834800|SCV005090056|SCV006277868|SCV006311302|SCV006321085
28339459	BRCA2	NM_000059.4	NM_000059.4:c.8010_8032del	NP_000050.3:p.Ala2671GlyfsTer2	frameshift_variant	exon	1	1	0	-	-	-	-	-	-	no aberration		-	0	N/A (frameshift - DNA level)	0.02	254619	reviewed_by_expert_panel	Pathogenic	NA	P	NO	SCV000301234
28339459	BRCA2	NM_000059.4	NM_000059.4:c.8019A>G	NP_000050.3:p.Lys2673=	synonymous_variant	exon	1	1	0	-	-	-	-	-	-	no aberration		-	0	≤20	0.01	4215409	criteria_provided,_single_submitter	Likely_benign	NA	LB	YES	SCV006477287
28339459	BRCA2	NM_000059.4	NM_000059.4:c.8023A>G	NP_000050.3:p.Ile2675Val	missense_variant	exon	1	0	1	-	-	Δ(E18q309)	0.93	other	0.07	complete		-	93	≥80	0.99	52475	reviewed_by_expert_panel	Pathogenic	NA	P	NO	SCV004101416
28339459	BRCA2	NM_000059.4	NM_000059.4:c.8027T>C	NP_000050.3:p.Met2676Thr	missense_variant	exon	1	1	0	-	-	-	-	-	-	no aberration		-	0	≤20	0.01	38136	criteria_provided,_multiple_submitters,_no_conflicts	Benign/Likely_benign	NA	B/LB	YES	SCV000073404|SCV000184213|SCV000210665|SCV000600778|SCV000903868|SCV001737788
28339459	BRCA2	NM_000059.4	NM_000059.4:c.8035G>T	NP_000050.3:p.Asp2679Tyr	missense_variant	exon	1	0.024	0.976	Δ(E18q298)	0.936	-	-	878-nt	0.04	high		-	93.6	≥80	0.98	52480	criteria_provided,_multiple_submitters,_no_conflicts	Uncertain_significance	NA	VUS	NO	SCV000838865|SCV001564942
28339459	BRCA2	NM_000059.4	NM_000059.4:c.8039A>G	NP_000050.3:p.Asp2680Gly	missense_variant	exon	1	1	0	-	-	-	-	-	-	no aberration		-	0	≤20	0.01	52482	criteria_provided,_conflicting_classifications	Conflicting_classifications_of_pathogenicity	Uncertain_significance(6)|Likely_benign(1)	VUS	NO	SCV001508547|SCV002071317|SCV002675545|SCV004362728|SCV004836045|SCV005688988|SCV005915666
28339459	BRCA2	NM_000059.4	NM_000059.4:c.8042C>G	NP_000050.3:p.Thr2681Arg	missense_variant	exon	1	0.977	0.023	Δ(E18)	0.023	-	-	-	-	low		-	2.3	≤20	0.01	142520	criteria_provided,_conflicting_classifications	Conflicting_classifications_of_pathogenicity	Uncertain_significance(9)|Likely_benign(2)	VUS	NO	SCV000186726|SCV000218834|SCV000226715|SCV000279383|SCV000296671|SCV000689092|SCV000918933|SCV001271927|SCV001271928|SCV004213595|SCV004845593
28339459	BRCA2	NM_000059.4	NM_000059.4:c.8072C>T	NP_000050.3:p.Ser2691Phe	missense_variant	exon	1	0.949	0.051	Δ(E18)	0.051	-	-	-	-	low		-	5.1	≤20	0	52497	criteria_provided,_multiple_submitters,_no_conflicts	Uncertain_significance	NA	VUS	NO	SCV000073427|SCV005199831
28339459	BRCA2	NM_000059.4	NM_000059.4:c.8084C>T	NP_000050.3:p.Ser2695Leu	missense_variant	exon	1	1	0	-	-	-	-	-	-	no aberration		-	0	≤20	0	52500	criteria_provided,_conflicting_classifications	Conflicting_classifications_of_pathogenicity	Uncertain_significance(1)|Likely_benign(6)	LB	YES	SCV000564797|SCV000608046|SCV000906948|SCV001567804|SCV002600621|SCV002822078|SCV004243068
28339459	BRCA2	NM_000059.4	NM_000059.4:c.8111C>T	NP_000050.3:p.Ser2704Phe	missense_variant	exon	1	1	0	-	-	-	-	-	-	no aberration		-	0	≤20	0.01	52507	criteria_provided,_conflicting_classifications	Conflicting_classifications_of_pathogenicity	Uncertain_significance(5)|Benign(2)|Likely_benign(4)	B/LB	YES	SCV000073437|SCV000217764|SCV000568492|SCV000683940|SCV001469455|SCV001746178|SCV002065806|SCV004845599|SCV005039498|SCV005374693|SCV006277510
28339459	BRCA2	NM_000059.4	NM_000059.4:c.8165C>G	NP_000050.3:p.Thr2722Arg	missense_variant	exon	1	1	0	-	-	-	-	-	-	no aberration		-	0	≤20	0.02	9340	reviewed_by_expert_panel	Pathogenic	NA	P	NO	SCV000244480
28339459	BRCA2	NM_000059.4	NM_000059.4:c.8168A>G	NP_000050.3:p.Asp2723Gly	missense_variant	exon	1	0.696	0.304	Δ(E18); Δ(E18q164)	4.5%; 25.9%	-	-	-	-	intermediate		-	30.4	>20 & <50	0.23	38141	reviewed_by_expert_panel	Pathogenic	NA	P	NO	SCV000244482
28339459	BRCA2	NM_000059.4	NM_000059.4:c.8191C>T	NP_000050.3:p.Gln2731Ter	stop_gained	exon	1	1	0	-	-	-	-	-	-	no aberration		-	0	N/A (stop gained)	0.03	52525	reviewed_by_expert_panel	Pathogenic	NA	P	NO	SCV000783876
28339459	BRCA2	NM_000059.4	NM_000059.4:c.8219dup	NP_000050.3:p.Leu2740PhefsTer24	frameshift_variant	exon	1	1	0	-	-	-	-	-	-	no aberration		-	0	N/A (frameshift - DNA level)	0.06	126170	reviewed_by_expert_panel	Pathogenic	NA	P	NO	SCV000301255
28339459	BRCA2	NM_000059.4	NM_000059.4:c.8331G>A	NP_000050.3:p.Lys2777=	splice_region_variant,synonymous_variant	exon,splice_region	1	0.407	0.593	Δ(E18)	0.52	-	-	other	0.073	intermediate		-	52	≥50 & <80	0.78	52552	criteria_provided,_conflicting_classifications	Conflicting_classifications_of_pathogenicity	Likely_pathogenic(1)|Uncertain_significance(1)	VUS	NO	SCV004052624|SCV005917634
28339459	BRCA2	NM_000059.4	NM_000059.4:c.8331+1G>T	-	splice_donor_variant	intron,splice_donor	1	0	1	Δ(E18); Δ(E18q157); Δ(E17q151_E18)	81.0%; 6.4%; 6.1%	[▼(E17q58)Δ(E18)]	0.037	other	0.028	complete		-	97.2	≥80	0.93	52550	criteria_provided,_single_submitter	Likely_pathogenic	NA	LP	YES	SCV002677153
28339459	BRCA2	NM_000059.4	NM_000059.4:c.8331+2T>C	-	splice_donor_variant	intron,splice_donor	1	0	1	Δ(E18); Δ(E17q151_E18)	87.1%; 12.9%	-	-	-	-	complete		-	100	≥80	0.93	267692	criteria_provided,_multiple_submitters,_no_conflicts	Pathogenic/Likely_pathogenic	NA	P/LP	YES	SCV000327868|SCV000605691|SCV000617474|SCV000689116|SCV000759096|SCV001178672|SCV002025847|SCV002531933|SCV003814482|SCV004024416|SCV004214585|SCV004220598|SCV004829267|SCV004848283|SCV005197324
25382762	BRCA2	NM_000059.4	NM_000059.4:c.8486A>T	NP_000050.3:p.Gln2829Leu	missense_variant,splice_region_variant	exon,splice_region	1	0.2	0.8	-	-	Δ(E19)	0.8	-	-	high		-	80	≥80	0.54	52601	no_assertion_criteria_provided	Uncertain_significance	NA	VUS	NO	SCV000147375
25382762	BRCA2	NM_000059.4	NM_000059.4:c.8488-1G>A	-	splice_acceptor_variant	intron,splice_acceptor	1	< 2%	0.98	▼(I19); Δ(E20)	43%; 28%	Δ(E20p12)	0.2	Ins-23nt ?	0.07	high		Δ(E20p12)	71	≥50 & <80	0.92	38164	reviewed_by_expert_panel	Pathogenic	NA	P	YES	SCV001161647
25382762	BRCA2	NM_000059.4	NM_000059.4:c.8633-24_8634del	-	splice_acceptor_variant,coding_sequence_variant	exon,intron,splice_acceptor	1	0	1	Δ(E21)	1	-	-	-	-	complete		-	100	≥80	1	267703	reviewed_by_expert_panel	Pathogenic	NA	P	YES	SCV001161649
25382762	BRCA2	NM_000059.4	NM_000059.4:c.8647C>T	NP_000050.3:p.Pro2883Ser	missense_variant	exon	1	1	0	-	-	-	-	-	-	no aberration		-	0	≤20	0.01	38175	criteria_provided,_conflicting_classifications	Conflicting_classifications_of_pathogenicity	Uncertain_significance(1)|Benign(1)|Likely_benign(5)	B/LB	YES	SCV000073603|SCV000512393|SCV000668605|SCV000689143|SCV000695168|SCV001139223|SCV002531963
25382762	BRCA2	NM_000059.4	NM_000059.4:c.8723T>G	NP_000050.3:p.Val2908Gly	missense_variant	exon	1	1	0	-	-	-	-	-	-	no aberration		-	0	≤20	0.01	52662	criteria_provided,_conflicting_classifications	Conflicting_classifications_of_pathogenicity	Uncertain_significance(1)|Likely_benign(11)	LB	YES	SCV000073621|SCV000186674|SCV000196017|SCV000210673|SCV000600820|SCV000679727|SCV000683994|SCV000918926|SCV001157037|SCV001961404|SCV002551830|SCV005415563
25382762	BRCA2	NM_000059.4	NM_000059.4:c.8732C>T	NP_000050.3:p.Ala2911Val	missense_variant	exon	1	1	0	-	-	-	-	-	-	no aberration		-	0	≤20	0.04	52664	criteria_provided,_conflicting_classifications	Conflicting_classifications_of_pathogenicity	Uncertain_significance(2)|Likely_benign(2)	VUS	NO	SCV000275292|SCV000695172|SCV000889163|SCV002127509
25382762	BRCA2	NM_000059.4	NM_000059.4:c.8745_8748dup	NP_000050.3:p.Glu2918ProfsTer2	frameshift_variant	exon	1	1	0	-	-	-	-	-	-	no aberration		-	0	N/A (frameshift - DNA level)	0.11	126189	reviewed_by_expert_panel	Pathogenic	NA	P	NO	SCV000301307
25382762	BRCA2	NM_000059.4	NM_000059.4:c.8754G>A	NP_000050.3:p.Glu2918=	splice_region_variant,synonymous_variant	exon,splice_region	1	0	1	▼(E21q46)	1	-	-	-	-	complete		-	100	≥80	0.98	52671	criteria_provided,_multiple_submitters,_no_conflicts	Pathogenic/Likely_pathogenic	NA	P/LP	YES	SCV000185972|SCV000327958|SCV000619052|SCV001133947|SCV001576245|SCV002819555|SCV004848891
25382762	BRCA2	NM_000059.4	NM_000059.4:c.8754+4A>G	-	splice_donor_region_variant	intron,splice_region	1	0	1	▼(E21q46)	1	-	-	-	-	complete		-	100	≥80	0.74	52669	reviewed_by_expert_panel	Pathogenic	NA	P	YES	SCV001161712
25382762	BRCA2	NM_000059.4	NM_000059.4:c.8754+5G>A	-	splice_donor_region_variant	intron,splice_region	1	0	1	▼(E21q46)	1	-	-	-	-	complete		-	100	≥80	0.85	38182	criteria_provided,_multiple_submitters,_no_conflicts	Pathogenic/Likely_pathogenic	NA	P/LP	YES	SCV000327957|SCV000666018|SCV000743352|SCV002304324|SCV004362774
25382762	BRCA2	NM_000059.4	NM_000059.4:c.8754+5G>T	-	splice_donor_region_variant	intron,splice_region	1	0	1	▼(E21q46)	1	-	-	-	-	complete		-	100	≥80	0.85	52670	no_assertion_criteria_provided	Uncertain_significance	NA	VUS	NO	SCV000147450
25382762	BRCA2	NM_000059.4	NM_000059.4:c.8755-1G>A	-	splice_acceptor_variant	intron,splice_acceptor	1	0	1	Δ(E22); Δ(E22p1)	17%; 83%	-	-	-	-	complete		-	100	≥80	0.99	38183	reviewed_by_expert_panel	Pathogenic	NA	P	YES	SCV000282251
25382762	BRCA2	NM_000059.4	NM_000059.4:c.8773C>T	NP_000050.3:p.Gln2925Ter	stop_gained	exon	1	1	0	-	-	-	-	-	-	no aberration		-	0	N/A (stop gained)	0.24	52676	reviewed_by_expert_panel	Pathogenic	NA	P	NO	SCV000301310
25382762	BRCA2	NM_000059.4	NM_000059.4:c.8789del	NP_000050.3:p.Asn2930IlefsTer7	frameshift_variant	exon	1	1	0	-	-	-	-	-	-	no aberration		-	0	N/A (frameshift - DNA level)	0.09	52680	reviewed_by_expert_panel	Pathogenic	NA	P	NO	SCV000301312
25382762	BRCA2	NM_000059.4	NM_000059.4:c.8915T>G	NP_000050.3:p.Leu2972Trp	missense_variant	exon	1	1	0	-	-	-	-	-	-	no aberration		-	0	≤20	0	52700	criteria_provided,_conflicting_classifications	Conflicting_classifications_of_pathogenicity	Uncertain_significance(9)|Likely_benign(2)	VUS	NO	SCV000210488|SCV000274114|SCV000684006|SCV001541203|SCV002500368|SCV002551838|SCV004216028|SCV004220632|SCV004846093|SCV005196952|SCV005431460
25382762	BRCA2	NM_000059.4	NM_000059.4:c.8948_8953+5del	-	splice_donor_variant,splice_donor_region_variant,coding_sequence_variant	exon,intron,splice_donor	1	0	1	Δ(E22); Δ(E22q7); ▼(I22)	52%; 23%; 25%	-	-	-	-	complete		-	100	≥80	0.99	141449	criteria_provided,_multiple_submitters,_no_conflicts	Pathogenic	NA	P	YES	SCV000184788|SCV000293590|SCV000296606|SCV000328003|SCV002123431|SCV002570879
25382762	BRCA2	NM_000059.4	NM_000059.4:c.8953+1G>T	-	splice_donor_variant	intron,splice_donor	1	0	1	Δ(E22); ▼(E22q4); ▼(I22)	44%; 17%; 39%	-	-	-	-	complete		-	100	≥80	0.99	38198	reviewed_by_expert_panel	Pathogenic	NA	P	YES	SCV000244490
25382762	BRCA2	NM_000059.4	NM_000059.4:c.9117G>A	NP_000050.3:p.Pro3039=	splice_region_variant,synonymous_variant	exon,splice_region	1	0	1	Δ(E23)	1	-	-	-	-	complete		-	100	≥80	0.89	38215	reviewed_by_expert_panel	Pathogenic	NA	P	YES	SCV004101443
25382762	BRCA2	NM_000059.4	NM_000059.4:c.9256+1G>A	-	splice_donor_variant	intron,splice_donor	1	0	1	Δ(E24); Δ(E24q43)	74%; 26%	-	-	-	-	complete		-	100	≥80	1	52787	criteria_provided,_multiple_submitters,_no_conflicts	Pathogenic/Likely_pathogenic	NA	P/LP	YES	SCV000328086|SCV001180385|SCV001579248|SCV005327481
25382762	BRCA2	NM_000059.4	NM_000059.4:c.9257-18C>A	-	intron_variant	intron,splice_region	1	1	0	-	-	-	-	-	-	no aberration		-	0	≤20	0.01	52791	criteria_provided,_multiple_submitters,_no_conflicts	Benign/Likely_benign	NA	B/LB	YES	SCV000073778|SCV000689185|SCV000695227|SCV001846765
25382762	BRCA2	NM_000059.4	NM_000059.4:c.9257-1G>C	-	splice_acceptor_variant	intron,splice_acceptor	1	0	1	-	-	Δ(E25p27)	1	-	-	complete		Δ(E25p27)	0	≤20	1	52793	criteria_provided,_multiple_submitters,_no_conflicts	Pathogenic	NA	P	YES	SCV000073780|SCV000185970|SCV000210500|SCV000328089|SCV000600851|SCV000839924|SCV001249502|SCV001354224|SCV002010291|SCV004212914|SCV005425838
25382762	BRCA2	NM_000059.4	NM_000059.4:c.9275_9278del	NP_000050.3:p.Tyr3092CysfsTer11	frameshift_variant	exon	1	1	0	-	-	-	-	-	-	no aberration		-	0	N/A (frameshift - DNA level)	0.01	52802	reviewed_by_expert_panel	Pathogenic	NA	P	NO	SCV000301371
25382762	BRCA2	NM_000059.4	NM_000059.4:c.9276T>G	NP_000050.3:p.Tyr3092Ter	stop_gained	exon	1	1	0	-	-	-	-	-	-	no aberration		-	0	N/A (stop gained)	0	52803	reviewed_by_expert_panel	Pathogenic	NA	P	NO	SCV000301370
25382762	BRCA2	NM_000059.4	NM_000059.4:c.9301C>G	NP_000050.3:p.Leu3101Val	missense_variant	exon	1	1	0	-	-	-	-	-	-	no aberration		-	0	≤20	0	52809	criteria_provided,_conflicting_classifications	Conflicting_classifications_of_pathogenicity	Uncertain_significance(3)|Likely_benign(1)	VUS	NO	SCV000607966|SCV001486262|SCV004216034|SCV004826676
25382762	BRCA2	NM_000059.4	NM_000059.4:c.9454G>A	NP_000050.3:p.Glu3152Lys	missense_variant	exon	1	1	0	-	-	-	-	-	-	no aberration		-	0	≤20	0	52838	criteria_provided,_conflicting_classifications	Conflicting_classifications_of_pathogenicity	Uncertain_significance(3)|Likely_benign(7)	B/LB	YES	SCV000073835|SCV000210687|SCV000216131|SCV000695240|SCV000911043|SCV001133981|SCV001714441|SCV002532036|SCV003830149|SCV004846178
25382762	BRCA2	NM_000059.4	NM_000059.4:c.9466del	NP_000050.3:p.Gln3156LysfsTer7	frameshift_variant	exon	1	1	0	-	-	-	-	-	-	no aberration		-	0	N/A (frameshift - DNA level)	0.02	52845	reviewed_by_expert_panel	Pathogenic	NA	P	NO	SCV000301396
25382762	BRCA2	NM_000059.4	NM_000059.4:c.9501G>A	NP_000050.3:p.Glu3167=	splice_region_variant,synonymous_variant	exon,splice_region	1	1	0	-	-	-	-	-	-	no aberration		-	0	≤20	0.16	52855	no_assertion_criteria_provided	Pathogenic	NA	P	NO - excluded after review: VUS	SCV000147655
25382762	BRCA2	NM_000059.4	NM_000059.4:c.9501+3A>T	-	splice_donor_region_variant	intron,splice_region	1	0.87	0.13	Δ(E25)	0.13	-	-	-	-	low		-	13	≤20	0.17	38242	reviewed_by_expert_panel	Benign	NA	B	YES	SCV001161629
25382762	BRCA2	NM_000059.4	NM_000059.4:c.9501+4A>G	-	splice_donor_region_variant	intron,splice_region	1	1	0	-	-	-	-	-	-	no aberration		-	0	≤20	0.02	52854	criteria_provided,_conflicting_classifications	Conflicting_classifications_of_pathogenicity	Uncertain_significance(3)|Benign(1)|Likely_benign(6)	B/LB	YES	SCV000073852|SCV000184087|SCV000512398|SCV000906964|SCV001470258|SCV002532038|SCV004818146|SCV005090076|SCV005917947|SCV006324808
25382762	BRCA2	NM_000059.4	NM_000059.4:c.9501+9A>C	-	intron_variant	intron	1	1	0	-	-	-	-	-	-	no aberration		-	0	≤20	0	38243	reviewed_by_expert_panel	Benign	NA	B	YES	SCV001161627
25382762	BRCA2	NM_000059.4	NM_000059.4:c.9502-12T>G	-	splice_polypyrimidine_tract_variant	intron,splice_region	1	0.92	0.08	-	-	Δ(E26)	0.08	-	-	low		-	8	≤20	0.02	52856	reviewed_by_expert_panel	Benign	NA	B	YES	SCV001161603
25382762	BRCA2	NM_000059.4	NM_000059.4:c.9502-2A>C	-	splice_acceptor_variant	intron,splice_acceptor	1	0	1	▼(E26p70); Δ(E26p28)	57%; 8%	Δ(E26)	0.33	-	-	complete		-	98	≥80	0.98	52858	criteria_provided,_multiple_submitters,_no_conflicts	Pathogenic/Likely_pathogenic	NA	P/LP	YES	SCV000185979|SCV000328148|SCV000600864|SCV001588440|SCV002532041|SCV004362822|SCV005059194
25382762	BRCA2	NM_000059.4	NM_000059.4:c.9550C>G	NP_000050.3:p.Leu3184Val	missense_variant	exon	1	1	0	-	-	-	-	-	-	no aberration		-	0	≤20	0.01	233655	criteria_provided,_conflicting_classifications	Conflicting_classifications_of_pathogenicity	Uncertain_significance(3)|Likely_benign(1)	VUS	NO	SCV000278077|SCV000684070|SCV001376047|SCV001822316
25382762	BRCA2	NM_000059.4	NM_000059.4:c.9610A>G	NP_000050.3:p.Thr3204Ala	missense_variant	exon	1	1	0	-	-	-	-	-	-	no aberration		-	0	≤20	0.01	52873	criteria_provided,_conflicting_classifications	Conflicting_classifications_of_pathogenicity	Uncertain_significance(5)|Likely_benign(1)	VUS	NO	SCV000073878|SCV000277176|SCV004213637|SCV004846199|SCV005874635|SCV006061023
25382762	BRCA2	NM_000059.4	NM_000059.4:c.9611C>G	NP_000050.3:p.Thr3204Ser	missense_variant	exon	1	1	0	-	-	-	-	-	-	no aberration		-	0	≤20	0.01	52874	criteria_provided,_multiple_submitters,_no_conflicts	Uncertain_significance	NA	VUS	NO	SCV000073879|SCV000889184|SCV002694828|SCV004240379
25382762	BRCA2	NM_000059.4	NM_000059.4:c.9613_9614delGCinsCT	NP_000050.3:p.Ala3205Leu	missense_variant	exon	1	1	0	-	-	-	-	-	-	no aberration		-	0	≤20	0	52875	criteria_provided,_conflicting_classifications	Conflicting_classifications_of_pathogenicity	Uncertain_significance(7)|Likely_benign(4)	VUS	NO	SCV000073880|SCV000184031|SCV000210801|SCV000684078|SCV000916855|SCV001133987|SCV002563167|SCV003830142|SCV003932779|SCV004213581|SCV004543923
25382762	BRCA2	NM_000059.4	NM_000059.4:c.9646C>T	NP_000050.3:p.Leu3216=	splice_region_variant,synonymous_variant	exon,splice_region	1	1	0	-	-	-	-	-	-	no aberration		-	0	≤20	0.01	52878	reviewed_by_expert_panel	Likely_benign	NA	LB	YES	SCV000578624
25382762	BRCA2	NM_000059.4	NM_000059.4:c.9649-5A>G	-	splice_polypyrimidine_tract_variant	intron,splice_region	1	1	0	-	-	-	-	-	-	no aberration		-	0	≤20	0.06	385769	criteria_provided,_conflicting_classifications	Conflicting_classifications_of_pathogenicity	Uncertain_significance(1)|Likely_benign(4)	LB	YES	SCV000527155|SCV001696980|SCV002046341|SCV005031648|SCV006063454
25382762	BRCA2	NM_000059.4	NM_000059.4:c.9649-2A>G	-	splice_acceptor_variant	intron,splice_acceptor	1	0	1	Δ(E27p62); Δ(E27p424)	72%; 28%	-	-	-	-	complete		-	100	≥80	0.99	52885	criteria_provided,_multiple_submitters,_no_conflicts	Pathogenic/Likely_pathogenic	NA	P/LP	YES	SCV005031647|SCV005823560
25382762	BRCA2	NM_000059.4	NM_000059.4:c.9698G>T	NP_000050.3:p.Cys3233Phe	missense_variant	exon	1	0.95	0.05	Δ(E27p62); Δ(E27p424)	<1%; 4%	-	-	-	-	low		-	4	≤20	0.36	2976136	criteria_provided,_multiple_submitters,_no_conflicts	Uncertain_significance	NA	VUS	NO	SCV004634966|SCV005032078|SCV005325302
39780207	TP53	NM_000546.6	NM_000546.6:c.993G>C	NP_000537.3:p.Gln331His	missense_variant,splice_region_variant	exon,splice_region	1	0.202	0.798	▼(I9-mg); Δ(E9)	15%; 61.5%	-	-	773-nt	0.033	intermediate		-	76.5	≥50 & <80	0.64	1497451	criteria_provided,_single_submitter	Uncertain_significance	NA	VUS	NO	SCV002285676
39780207	TP53	NM_000546.6	NM_000546.6:c.993G>T	NP_000537.3:p.Gln331His	missense_variant,splice_region_variant	exon,splice_region	1	0.253	0.747	▼(I9-mg); Δ(E9)	29.7%; 45%	-	-	-	-	intermediate		-	74.7	≥50 & <80	0.62	2832740	criteria_provided,_single_submitter	Uncertain_significance	NA	VUS	NO	SCV004433850
39780207	TP53	NM_000546.6	NM_000546.6:c.992A>G	NP_000537.3:p.Gln331Arg	missense_variant,splice_region_variant	exon,splice_region	1	0.706	0.294	▼(I9-mg); Δ(E9)	19.5%; 9.9%	-	-	-	-	intermediate		-	29.4	>20 & <50	0.36	421319	criteria_provided,_conflicting_classifications	Conflicting_classifications_of_pathogenicity	Uncertain_significance(4)|Likely_benign(1)	VUS	NO	SCV000570482|SCV001200660|SCV002582855|SCV002583227|SCV005036134
39780207	TP53	NM_000546.6	NM_000546.6:c.783-1G>A	-	splice_acceptor_variant	intron,splice_acceptor	1	0	1	▼(I7)	0.016	Δ(E8p24); ▼(E8p3)	48.2%; 50.2%	-	-	complete		▼(E8p3)	50	≥50 & <80	1	458565	criteria_provided,_multiple_submitters,_no_conflicts	Pathogenic/Likely_pathogenic	NA	P/LP	YES	SCV000629870|SCV000672380|SCV002580191|SCV002582462|SCV002583123|SCV005407750|SCV005918361|SCV006093308
39780207	TP53	NM_000546.6	NM_000546.6:c.835G>A	NP_000537.3:p.Gly279Arg	missense_variant	exon	1	0.7	0.3	-	-	Δ(E8p54)	0.3	-	-	intermediate		-	30	>20 & <50	0.92	458568	criteria_provided,_conflicting_classifications	Conflicting_classifications_of_pathogenicity	Likely_pathogenic(1)|Uncertain_significance(4)	VUS	NO	SCV000629876|SCV000672406|SCV002549874|SCV004206211|SCV006277471
39780207	TP53	NM_000546.6	NM_000546.6:c.817C>A	NP_000537.3:p.Arg273Ser	missense_variant	exon	1	1	0	-	-	-	-	-	-	no aberration		-	0	≤20	0.05	376656	criteria_provided,_multiple_submitters,_no_conflicts	Pathogenic	NA	P	NO	SCV000664439|SCV000827427|SCV002582454|SCV002583116|SCV004931836
39780207	TP53	NM_000546.6	NM_000546.6:c.816G>A	NP_000537.3:p.Val272=	synonymous_variant	exon	1	1	0	-	-	-	-	-	-	no aberration		-	0	≤20	0.02	1136213	criteria_provided,_multiple_submitters,_no_conflicts	Benign/Likely_benign	NA	B/LB	YES	SCV001675893|SCV005522153|SCV006298733
39780207	TP53	NM_000546.6	NM_000546.6:c.811G>A	NP_000537.3:p.Glu271Lys	missense_variant	exon	1	0.973	0.027	-	-	-	-	955-nt	0.027	low		-	0	≤20	0.01	406566	criteria_provided,_conflicting_classifications	Conflicting_classifications_of_pathogenicity	Likely_pathogenic(3)|Uncertain_significance(2)	LP	NO	SCV000545276|SCV000910131|SCV001189712|SCV002063561|SCV004012927
39780207	TP53	NM_000546.6	NM_000546.6:c.811G>C	NP_000537.3:p.Glu271Gln	missense_variant	exon	1	0.967	0.033	-	-	-	-	955-nt	0.033	low		-	0	≤20	0.32	3634426	criteria_provided,_single_submitter	Uncertain_significance	NA	VUS	NO	SCV005733521
39780207	TP53	NM_000546.6	NM_000546.6:c.797G>T	NP_000537.3:p.Gly266Val	missense_variant	exon	1	0.984	0.016	-	-	-	-	955-nt	0.016	low		-	0	≤20	0.17	233303	criteria_provided,_conflicting_classifications	Conflicting_classifications_of_pathogenicity	Pathogenic(1)|Uncertain_significance(3)	VUS	NO	SCV000277650|SCV002170693|SCV002581995|SCV002583177
39780207	TP53	NM_000546.6	NM_000546.6:c.784G>A	NP_000537.3:p.Gly262Ser	missense_variant	exon	1	1	0	-	-	-	-	-	-	no aberration		-	0	≤20	0.52	141228	reviewed_by_expert_panel	Likely_benign	NA	LB	YES	SCV001432164
39780207	TP53	NM_000546.6	NM_000546.6:c.782+1G>A	-	splice_donor_variant	intron,splice_donor	1	0	1	Δ(E7); ▼(I7)	10.3%; 89.7%	-	-	-	-	complete		-	100	≥80	0.99	634684	criteria_provided,_multiple_submitters,_no_conflicts	Pathogenic	NA	P	YES	SCV001228639|SCV006451503
39780207	TP53	NM_000546.6	NM_000546.6:c.782G>C	NP_000537.3:p.Ser261Thr	missense_variant,splice_region_variant	exon,splice_region	1	0.166	0.834	Δ(E7); ▼(I7)	5.7%; 77.7%	-	-	-	-	high		-	83.4	≥80	0.64	187005	criteria_provided,_multiple_submitters,_no_conflicts	Uncertain_significance	NA	VUS	NO	SCV000217491|SCV005736992
39780207	TP53	NM_000546.6	NM_000546.6:c.781A>C	NP_000537.3:p.Ser261Arg	missense_variant,splice_region_variant	exon,splice_region	1	1	0	-	-	-	-	-	-	no aberration		-	0	≤20	0.03	3708635	criteria_provided,_single_submitter	Uncertain_significance	NA	VUS	NO	SCV005818665
39780207	TP53	NM_000546.6	NM_000546.6:c.781A>G	NP_000537.3:p.Ser261Gly	missense_variant,splice_region_variant	exon,splice_region	1	1	0	-	-	-	-	-	-	no aberration		-	0	≤20	0.04	1383522	criteria_provided,_conflicting_classifications	Conflicting_classifications_of_pathogenicity	Uncertain_significance(1)|Likely_benign(1)	VUS	NO	SCV002151432|SCV005177951
39780207	TP53	NM_000546.6	NM_000546.6:c.710T>G	NP_000537.3:p.Met237Arg	missense_variant	exon	1	0.952	0.048	Δ(E7p38)	0.048	-	-	-	-	low		-	4.8	≤20	0.58	419524	criteria_provided,_multiple_submitters,_no_conflicts	Uncertain_significance	NA	VUS	NO	SCV000567377|SCV002664240|SCV003349253
39780207	TP53	NM_000546.6	NM_000546.6:c.672+1G>A	-	splice_donor_variant	intron,splice_donor	1	0	1	▼(E6q5); Δ(E6)	89.9%; 5.8%	-	-	925-nt; 1005-nt	2.3%; 2.1%	complete		-	95.7	≥80	0.99	216078	criteria_provided,_multiple_submitters,_no_conflicts	Pathogenic/Likely_pathogenic	NA	P/LP	YES	SCV000253850|SCV002559557|SCV002582476|SCV002583137|SCV003911996|SCV004204265|SCV004359993|SCV004932263
39780207	TP53	NM_000546.6	NM_000546.6:c.673-1G>A	-	splice_acceptor_variant	intron,splice_acceptor	1	0	1	▼(E7p49); Δ(E7p1); ▼(I6)	63.4%; 21.5%; 7.7%	-	-	320-nt; 1050-nt; 1155-nt	2.5%; 3.5%; 1.4%	complete		-	92.6	≥80	1	379336	criteria_provided,_multiple_submitters,_no_conflicts	Pathogenic	NA	P	YES	SCV000516108|SCV000821784|SCV001187807|SCV001198241|SCV002582474|SCV002583135
39780207	TP53	NM_000546.6	NM_000546.6:c.672G>C	NP_000537.3:p.Glu224Asp	missense_variant,splice_region_variant	exon,splice_region	1	0	1	▼(E6q5); Δ(E6)	93.9%; 6.1%	-	-	-	-	complete		-	100	≥80	0.98	1493447	criteria_provided,_single_submitter	Uncertain_significance	NA	VUS	NO	SCV002278101
39780207	TP53	NM_000546.6	NM_000546.6:c.672G>T	NP_000537.3:p.Glu224Asp	missense_variant,splice_region_variant	exon,splice_region	1	0	1	▼(E6q5); Δ(E6)	95.7%; 4.3%	-	-	-	-	complete		-	100	≥80	0.97	635390	criteria_provided,_conflicting_classifications	Conflicting_classifications_of_pathogenicity	Uncertain_significance(1)|Likely_benign(1)	VUS	NO	SCV003443761|SCV005402682
39780207	TP53	NM_000546.6	NM_000546.6:c.671A>C	NP_000537.3:p.Glu224Ala	missense_variant,splice_region_variant	exon,splice_region	1	0	1	▼(E6q5); Δ(E6)	87.6%; 7.1%	-	-	1043-nt	0.053	complete		-	94.7	≥80	0.77	428892	criteria_provided,_multiple_submitters,_no_conflicts	Uncertain_significance	NA	VUS	NO	SCV000581140|SCV001400797|SCV002582029|SCV002582507
39780207	TP53	NM_000546.6	NM_000546.6:c.671A>G	NP_000537.3:p.Glu224Gly	missense_variant,splice_region_variant	exon,splice_region	1	0.52	0.48	▼(E6q5); Δ(E6)	23.4%; 24.6%	-	-	-	-	intermediate		-	48	>20 & <50	0.73	826574	criteria_provided,_multiple_submitters,_no_conflicts	Uncertain_significance	NA	VUS	NO	SCV001187784|SCV004206218
39780207	TP53	NM_000546.6	NM_000546.6:c.560G>C	NP_000537.3:p.Gly187Ala	missense_variant,splice_region_variant	exon,splice_region	1	0.373	0.627	Δ(E6)	0.627	-	-	-	-	intermediate		-	62.7	≥50 & <80	0.29	1479275	criteria_provided,_multiple_submitters,_no_conflicts	Uncertain_significance	NA	VUS	NO	SCV002258744|SCV005522151
39780207	TP53	NM_000546.6	NM_000546.6:c.560G>T	NP_000537.3:p.Gly187Val	missense_variant,splice_region_variant	exon,splice_region	1	0.418	0.582	Δ(E6)	0.582	-	-	-	-	intermediate		-	58.2	≥50 & <80	0.38	2032550	criteria_provided,_single_submitter	Uncertain_significance	NA	VUS	NO	SCV003237696
39780207	TP53	NM_000546.6	NM_000546.6:c.559+1G>A	-	splice_donor_variant	intron,splice_donor	1	0	1	Δ(E5q46); ▼(I5)	90.9%; 5.9%	-	-	953-nt	0.033	complete		-	96.8	≥80	1	428908	criteria_provided,_multiple_submitters,_no_conflicts	Pathogenic/Likely_pathogenic	NA	P/LP	YES	SCV000581171|SCV000894155|SCV001247048|SCV001382477|SCV002005066|SCV002582378|SCV002583039|SCV004204286|SCV004930469
39780207	TP53	NM_000546.6	NM_000546.6:c.560-2A>C	-	splice_acceptor_variant	intron,splice_acceptor	1	0	1	Δ(E6p17); Δ(E6); ▼(I5)	78.2%; 16.6%; 2.6%	-	-	-	-	complete		-	97.4	≥80	0.98	1189743	criteria_provided,_multiple_submitters,_no_conflicts	Pathogenic	NA	P	YES	SCV001770512|SCV002241970|SCV002582489|SCV002583150|SCV005689588
39780207	TP53	NM_000546.6	NM_000546.6:c.559G>A	NP_000537.3:p.Gly187Ser	missense_variant,splice_region_variant	exon,splice_region	1	0	1	Δ(E5q46)	0.889	-	-	417-nt	0.111	complete		-	88.9	≥80	0.56	840399	criteria_provided,_conflicting_classifications	Conflicting_classifications_of_pathogenicity	Uncertain_significance(3)|Likely_benign(1)	VUS	NO	SCV001206053|SCV002648850|SCV005402586|SCV005872479
39780207	TP53	NM_000546.6	NM_000546.6:c.559G>C	NP_000537.3:p.Gly187Arg	missense_variant,splice_region_variant	exon,splice_region	1	0	1	Δ(E5q46)	1	-	-	-	-	complete		-	100	≥80	0.4	635392	criteria_provided,_conflicting_classifications	Conflicting_classifications_of_pathogenicity	Likely_pathogenic(1)|Uncertain_significance(1)	VUS	NO	SCV001491803|SCV002651396
39780207	TP53	NM_000546.6	NM_000546.6:c.551A>G	NP_000537.3:p.Asp184Gly	missense_variant	exon	1	0.378	0.622	-	-	Δ(E5q9)	0.622	-	-	intermediate		-	62.2	≥50 & <80	0.98	406606	criteria_provided,_single_submitter	Uncertain_significance	NA	VUS	NO	SCV000545357
39780207	TP53	NM_000546.6	NM_000546.6:c.410T>A	NP_000537.3:p.Leu137Gln	missense_variant	exon	1	0	1	-	-	Δ(E5p36)	1	-	-	complete		-	100	≥80	0.7	3972459	criteria_provided,_single_submitter	Uncertain_significance	NA	VUS	NO	SCV006182472
39780207	TP53	NM_000546.6	NM_000546.6:c.376-1G>A	-	splice_acceptor_variant	intron,splice_acceptor	1	0	1	-	-	Δ(E5p21)	1	-	-	complete		-	100	≥80	1	481003	criteria_provided,_multiple_submitters,_no_conflicts	Pathogenic/Likely_pathogenic	NA	P/LP	YES	SCV000665059|SCV000939844|SCV001786270|SCV002582608|SCV002583170|SCV004026692|SCV004933395|SCV005625969
39780207	TP53	NM_000546.6	NM_000546.6:c.374C>G	NP_000537.3:p.Thr125Arg	missense_variant,splice_region_variant	exon,splice_region	1	1	0	-	-	-	-	-	-	no aberration		-	0	≤20	0.15	376667	criteria_provided,_multiple_submitters,_no_conflicts	Pathogenic/Likely_pathogenic	NA	P/LP	NO	SCV000581128|SCV000629809|SCV002582406|SCV002583068|SCV004011719|SCV004931104|SCV005324867|SCV005407753
39780207	TP53	NM_000546.6	NM_000546.6:c.368C>G	NP_000537.3:p.Thr123Ser	missense_variant	exon	1	0.599	0.401	-	-	Δ(E4q12)	0.401	-	-	intermediate		-	40.1	>20 & <50	0.95	1460570	criteria_provided,_single_submitter	Uncertain_significance	NA	VUS	NO	SCV002241083
39780207	TP53	NM_000546.6	NM_000546.6:c.359A>G	NP_000537.3:p.Lys120Arg	missense_variant	exon	1	0.175	0.825	Δ(E4q16); Δ(E4q16_E5)	67.5%; 6.4%	-	-	364-nt	0.086	high		-	73.9	≥50 & <80	0.93	1360099	criteria_provided,_multiple_submitters,_no_conflicts	Uncertain_significance	NA	VUS	NO	SCV002127018|SCV005036120|SCV005918322
39780207	TP53	NM_000546.6	NM_000546.6:c.356C>G	NP_000537.3:p.Ala119Gly	missense_variant	exon	1	0.051	0.949	Δ(E4q20); Δ(E4q200)	24.0%; 70.9%	-	-	-	-	high		-	94.9	≥80	0.82	949408	criteria_provided,_conflicting_classifications	Conflicting_classifications_of_pathogenicity	Likely_pathogenic(1)|Uncertain_significance(1)	VUS	NO	SCV001392876|SCV005036216
39780207	TP53	NM_000546.6	NM_000546.6:c.325T>A	NP_000537.3:p.Phe109Ile	missense_variant	exon	1	1	0	-	-	-	-	-	-	no aberration		-	0	≤20	0.64	2627017	criteria_provided,_multiple_submitters,_no_conflicts	Likely_pathogenic	NA	LP	NO	SCV004098979|SCV005198847
39780207	TP53	NM_000546.6	NM_000546.6:c.318C>G	NP_000537.3:p.Ser106Arg	missense_variant	exon	1	0	1	Δ(E4q58)	1	-	-	-	-	complete		-	100	≥80	1	492752	criteria_provided,_conflicting_classifications	Conflicting_classifications_of_pathogenicity	Likely_pathogenic(1)|Uncertain_significance(1)	VUS	NO	SCV001220062|SCV005324868
39780207	TP53	NM_000546.6	NM_000546.6:c.315C>T	NP_000537.3:p.Gly105=	synonymous_variant	exon	1	0.841	0.159	Δ(E4q200); Δ(E4q62)	13.0%; 3.0%	-	-	-	-	low		-	16	≤20	0.73	4071190	criteria_provided,_single_submitter	Benign	NA	B	YES	SCV006300448
39780207	TP53	NM_000546.6	NM_000546.6:c.314G>T	NP_000537.3:p.Gly105Val	missense_variant	exon	1	0.136	0.864	-	-	Δ(E4q63)	0.864	-	-	high		-	86.4	≥80	0.98	634708	criteria_provided,_conflicting_classifications	Conflicting_classifications_of_pathogenicity	Likely_pathogenic(1)|Uncertain_significance(1)	VUS	NO	SCV003806323|SCV005812858
39780207	TP53	NM_000546.6	NM_000546.6:c.236C>G	NP_000537.3:p.Ala79Gly	missense_variant	exon	1	0.458	0.542	Δ(E4q140)	0.542	-	-	-	-	intermediate		-	54.2	≥50 & <80	0.8	655254	criteria_provided,_multiple_submitters,_no_conflicts	Uncertain_significance	NA	VUS	NO	SCV000951646|SCV004004448
39780207	TP53	NM_000546.6	NM_000546.6:c.206C>T	NP_000537.3:p.Ala69Val	missense_variant	exon	1	0.345	0.655	Δ(E4q200)	0.035	Δ(E4q171)	0.621	-	-	intermediate		-	65.6	≥50 & <80	0.61	528260	criteria_provided,_conflicting_classifications	Conflicting_classifications_of_pathogenicity	Uncertain_significance(3)|Likely_benign(1)	VUS	NO	SCV000754588|SCV001175004|SCV002582142|SCV002582704
39780207	TP53	NM_000546.6	NM_000546.6:c.182A>G	NP_000537.3:p.Asp61Gly	missense_variant	exon	1	0.118	0.882	Δ(E4q194)	0.882	-	-	-	-	high		-	88.2	≥80	0.98	950660	criteria_provided,_conflicting_classifications	Conflicting_classifications_of_pathogenicity	Uncertain_significance(3)|Likely_benign(1)	VUS	NO	SCV001394513|SCV002711144|SCV004837532|SCV005402605
39780207	TP53	NM_000546.6	NM_000546.6:c.97-1G>A	-	splice_acceptor_variant	intron,splice_acceptor	1	0	1	Δ(E4p19)	0.153	Δ(E4)	0.847	-	-	complete		-	100	≥80	0.99	638853	reviewed_by_expert_panel	Pathogenic	NA	P	YES	SCV001142562
39780207	TP53	NM_000546.6	NM_000546.6:c.46C>A	NP_000537.3:p.Gln16Lys	missense_variant	exon	1	0.47	0.53	Δ(E2q31)	0.53	-	-	-	-	intermediate		-	53	≥50 & <80	0.84	1172924	reviewed_by_expert_panel	Uncertain_significance	NA	VUS	NO	SCV001737930
40341019	TP53	NM_000546.6	NM_000546.6:c.75-2A>G	-	splice_acceptor_variant	intron,splice_acceptor	1	0	1	Δ(E3); Δ(E3_E4p19)	27.5%; 34.5%	Δ(E3_E4); ▼(I2)	31.4%; 3.8%	785-nt	0.028	complete		-	97.2	≥80	0.99	428882	criteria_provided,_multiple_submitters,_no_conflicts	Likely_pathogenic	NA	LP	YES	SCV000581120|SCV002295345|SCV002582415|SCV002583076
40341019	TP53	NM_000546.6	NM_000546.6:c.96+1G>T	-	splice_donor_variant	intron,splice_donor	1	0	1	Δ(E3)	1	-	-	-	-	complete		-	100	≥80	1	482212	criteria_provided,_multiple_submitters,_no_conflicts	Pathogenic/Likely_pathogenic	NA	P/LP	YES	SCV000667182|SCV000894157|SCV001374404|SCV002582414|SCV002583075|SCV004931081
40341019	TP53	NM_000546.6	NM_000546.6:c.96+31_96+54del	-	intron_variant	intron	1	0.949	0.051	-	-	Δ(E4)	0.026	954-nt	0.025	low		-	2.6	≤20	0.05	926699	criteria_provided,_single_submitter	Likely_benign	NA	LB	YES	SCV001356807
40341019	TP53	NM_000546.6	NM_000546.6:c.581_585del	NP_000537.3:p.Leu194ProfsTer13	frameshift_variant	exon	1	0.933	0.067	Δ(E5q91_E6)	0.067	-	-	-	-	low		-	6.7	N/A (frameshift - DNA level)	0.01	1076187	criteria_provided,_single_submitter	Pathogenic	NA	P	NO	SCV001591573
40341019	TP53	NM_000546.6	NM_000546.6:c.628_639del	NP_000537.3:p.Asn210_Arg213del	inframe_deletion	exon	1	0.983	0.017	Δ(E6)	0.017	-	-	-	-	low		-	1.7	N/A (deletion - DNA level, affects DNA binding domain)	0.21	984966	criteria_provided,_single_submitter	Pathogenic	NA	P	NO	SCV001443793
40341019	TP53	NM_000546.6	NM_000546.6:c.655_670del	NP_000537.3:p.Pro219ArgfsTer23	frameshift_variant,splice_region_variant	exon,splice_region	1	0.027	0.973	▼(E6del5q130)	0.069	Δ(E6q21)	0.904	-	-	high		-	97.3	N/A (frameshift - DNA level)	0.93	486553	criteria_provided,_single_submitter	Pathogenic	NA	P	NO	SCV000675337
40341019	TP53	NM_000546.6	NM_000546.6:c.96G>C	NP_000537.3:p.Leu32=	splice_region_variant,synonymous_variant	exon,splice_region	1	0.96	0.04	Δ(E3)	0.04	-	-	-	-	low		-	4	≤20	0.04	4189252	criteria_provided,_single_submitter	Uncertain_significance	NA	VUS	NO	SCV006455258
40341019	TP53	NM_000546.6	NM_000546.6:c.590T>G	NP_000537.3:p.Val197Gly	missense_variant	exon	1	0.954	0.046	Δ(E6)	0.046	-	-	-	-	low		-	4.6	≤20	0.13	826051	criteria_provided,_multiple_submitters,_no_conflicts	Uncertain_significance	NA	VUS	NO	SCV001186735|SCV001414435|SCV002582049|SCV002582347
40341019	TP53	NM_000546.6	NM_000546.6:c.592G>T	NP_000537.3:p.Glu198Ter	stop_gained	exon	1	0.741	0.259	Δ(E6)	0.259	-	-	-	-	intermediate		-	25.9	N/A (stop gained)	0.35	634704	criteria_provided,_single_submitter	Pathogenic	NA	P	NO	SCV002959600
40341019	TP53	NM_000546.6	NM_000546.6:c.594A>G	NP_000537.3:p.Glu198=	synonymous_variant	exon	1	0.955	0.045	Δ(E6)	0.045	-	-	-	-	low		-	4.5	≤20	0.13	2758376	criteria_provided,_single_submitter	Likely_benign	NA	LB	YES	SCV004320398
40341019	TP53	NM_000546.6	NM_000546.6:c.619G>C	NP_000537.3:p.Asp207His	missense_variant	exon	1	0.969	0.031	Δ(E6)	0.031	-	-	-	-	low		-	3.1	≤20	0.19	919639	criteria_provided,_single_submitter	Uncertain_significance	NA	VUS	NO	SCV001342263
40341019	TP53	NM_000546.6	NM_000546.6:c.622G>T	NP_000537.3:p.Asp208Tyr	missense_variant	exon	1	0.835	0.165	Δ(E6)	0.165	-	-	-	-	low		-	16.5	≤20	0.09	1350980	criteria_provided,_conflicting_classifications	Conflicting_classifications_of_pathogenicity	Pathogenic(1)|Uncertain_significance(1)	VUS	NO	SCV002114370|SCV003806300
40341019	TP53	NM_000546.6	NM_000546.6:c.661G>T	NP_000537.3:p.Glu221Ter	stop_gained	exon	1	0.92	0.08	Δ(E6)	0.08	-	-	-	-	low		-	8	N/A (stop gained)	0.19	634754	criteria_provided,_multiple_submitters,_no_conflicts	Pathogenic	NA	P	NO	SCV000934290|SCV004932653
40341019	TP53	NM_000546.6	NM_000546.6:c.672+7T>G	-	intron_variant	intron	1	0.901	0.099	Δ(E6)	0.099	-	-	-	-	low		-	9.9	≤20	0.14	4071436	criteria_provided,_single_submitter	Likely_benign	NA	LB	YES	SCV006298789
40341019	TP53	NM_000546.6	NM_000546.6:c.672+18G>A	-	intron_variant	intron	1	0.857	0.143	Δ(E6)	0.143	-	-	-	-	low		-	14.3	≤20	0.15	3673840	criteria_provided,_single_submitter	Likely_benign	NA	LB	YES	SCV005778140
40341019	TP53	NM_000546.6	NM_000546.6:c.76C>A	NP_000537.3:p.Leu26Ile	missense_variant	exon	1	1	0	-	-	-	-	-	-	no aberration		-	0	≤20	0	923838	criteria_provided,_single_submitter	Uncertain_significance	NA	VUS	NO	SCV001350940
40341019	TP53	NM_000546.6	NM_000546.6:c.78T>C	NP_000537.3:p.Leu26=	synonymous_variant	exon	1	1	0	-	-	-	-	-	-	no aberration		-	0	≤20	0	482209	criteria_provided,_multiple_submitters,_no_conflicts	Benign/Likely_benign	NA	B/LB	YES	SCV000667179|SCV000968920|SCV001632434|SCV002582306|SCV002582968|SCV004360022|SCV006301592
40341019	TP53	NM_000546.6	NM_000546.6:c.79C>A	NP_000537.3:p.Pro27Thr	missense_variant	exon	1	1	0	-	-	-	-	-	-	no aberration		-	0	≤20	0.01	406600	criteria_provided,_conflicting_classifications	Conflicting_classifications_of_pathogenicity	Uncertain_significance(4)|Likely_benign(1)	VUS	NO	SCV000545349|SCV001134878|SCV002582174|SCV002582737|SCV002678645
40341019	TP53	NM_000546.6	NM_000546.6:c.79C>G	NP_000537.3:p.Pro27Ala	missense_variant	exon	1	1	0	-	-	-	-	-	-	no aberration		-	0	≤20	0	1505620	criteria_provided,_conflicting_classifications	Conflicting_classifications_of_pathogenicity	Uncertain_significance(1)|Likely_benign(1)	VUS	NO	SCV002288294|SCV002679411
40341019	TP53	NM_000546.6	NM_000546.6:c.79C>T	NP_000537.3:p.Pro27Ser	missense_variant	exon	1	1	0	-	-	-	-	-	-	no aberration		-	0	≤20	0.01	528271	criteria_provided,_multiple_submitters,_no_conflicts	Uncertain_significance	NA	VUS	NO	SCV000754615|SCV000903794|SCV001189532|SCV002066802|SCV002582173|SCV002582736
40341019	TP53	NM_000546.6	NM_000546.6:c.80C>G	NP_000537.3:p.Pro27Arg	missense_variant	exon	1	1	0	-	-	-	-	-	-	no aberration		-	0	≤20	0	664352	criteria_provided,_single_submitter	Uncertain_significance	NA	VUS	NO	SCV000963237
40341019	TP53	NM_000546.6	NM_000546.6:c.80C>T	NP_000537.3:p.Pro27Leu	missense_variant	exon	1	1	0	-	-	-	-	-	-	no aberration		-	0	≤20	0.01	481176	criteria_provided,_multiple_submitters,_no_conflicts	Uncertain_significance	NA	VUS	NO	SCV000665397|SCV002198686|SCV002582172|SCV002582735|SCV005918363
40341019	TP53	NM_000546.6	NM_000546.6:c.81T>C	NP_000537.3:p.Pro27=	synonymous_variant	exon	1	1	0	-	-	-	-	-	-	no aberration		-	0	≤20	0	511134	criteria_provided,_multiple_submitters,_no_conflicts	Likely_benign	NA	LB	YES	SCV000721579|SCV001594053|SCV002582305|SCV002582967
40341019	TP53	NM_000546.6	NM_000546.6:c.81T>G	NP_000537.3:p.Pro27=	synonymous_variant	exon	1	1	0	-	-	-	-	-	-	no aberration		-	0	≤20	0.01	1762440	criteria_provided,_multiple_submitters,_no_conflicts	Likely_benign	NA	LB	YES	SCV002679710|SCV003224706
40341019	TP53	NM_000546.6	NM_000546.6:c.82G>A	NP_000537.3:p.Glu28Lys	missense_variant	exon	1	1	0	-	-	-	-	-	-	no aberration		-	0	≤20	0.01	3634439	criteria_provided,_single_submitter	Uncertain_significance	NA	VUS	NO	SCV005732441
40341019	TP53	NM_000546.6	NM_000546.6:c.83A>T	NP_000537.3:p.Glu28Val	missense_variant	exon	1	1	0	-	-	-	-	-	-	no aberration		-	0	≤20	0.01	185581	criteria_provided,_conflicting_classifications	Conflicting_classifications_of_pathogenicity	Uncertain_significance(4)|Likely_benign(1)	VUS	NO	SCV000215722|SCV002125174|SCV002582171|SCV002582734|SCV005054331
40341019	TP53	NM_000546.6	NM_000546.6:c.85A>G	NP_000537.3:p.Asn29Asp	missense_variant	exon	1	1	0	-	-	-	-	-	-	no aberration		-	0	≤20	0.01	822586	criteria_provided,_single_submitter	Likely_benign	NA	LB	YES	SCV001179227
40341019	TP53	NM_000546.6	NM_000546.6:c.86A>C	NP_000537.3:p.Asn29Thr	missense_variant	exon	1	1	0	-	-	-	-	-	-	no aberration		-	0	≤20	0	842527	criteria_provided,_multiple_submitters,_no_conflicts	Uncertain_significance	NA	VUS	NO	SCV001208782|SCV001343836|SCV002582170|SCV002582732|SCV002684595
40341019	TP53	NM_000546.6	NM_000546.6:c.87C>G	NP_000537.3:p.Asn29Lys	missense_variant	exon	1	1	0	-	-	-	-	-	-	no aberration		-	0	≤20	0	638927	criteria_provided,_multiple_submitters,_no_conflicts	Uncertain_significance	NA	VUS	NO	SCV000930866|SCV002532719|SCV002582169|SCV002582731|SCV004058540
40341019	TP53	NM_000546.6	NM_000546.6:c.87C>T	NP_000537.3:p.Asn29=	synonymous_variant	exon	1	1	0	-	-	-	-	-	-	no aberration		-	0	≤20	0.01	1764717	criteria_provided,_multiple_submitters,_no_conflicts	Benign/Likely_benign	NA	B/LB	YES	SCV002687297|SCV005840664|SCV006299087
40341019	TP53	NM_000546.6	NM_000546.6:c.88A>G	NP_000537.3:p.Asn30Asp	missense_variant	exon	1	1	0	-	-	-	-	-	-	no aberration		-	0	≤20	0.01	3634438	criteria_provided,_single_submitter	Uncertain_significance	NA	VUS	NO	SCV005732502
40341019	TP53	NM_000546.6	NM_000546.6:c.89A>T	NP_000537.3:p.Asn30Ile	missense_variant	exon	1	1	0	-	-	-	-	-	-	no aberration		-	0	≤20	0	1515391	criteria_provided,_single_submitter	Uncertain_significance	NA	VUS	NO	SCV002297602
40341019	TP53	NM_000546.6	NM_000546.6:c.90C>T	NP_000537.3:p.Asn30=	synonymous_variant	exon	1	1	0	-	-	-	-	-	-	no aberration		-	0	≤20	0.01	215764	criteria_provided,_multiple_submitters,_no_conflicts	Benign/Likely_benign	NA	B/LB	YES	SCV000253317|SCV000277010|SCV000514932|SCV000686781|SCV000884716|SCV002582304|SCV002582965|SCV004823859|SCV006298831
40341019	TP53	NM_000546.6	NM_000546.6:c.91G>A	NP_000537.3:p.Val31Ile	missense_variant	exon	1	1	0	-	-	-	-	-	-	no aberration		-	0	≤20	0.01	127827	criteria_provided,_conflicting_classifications	Conflicting_classifications_of_pathogenicity	Uncertain_significance(2)|Benign(1)|Likely_benign(10)	B/LB	YES	SCV000149651|SCV000166401|SCV000187523|SCV000407074|SCV000697455|SCV000910670|SCV001140270|SCV001193757|SCV002046225|SCV002532723|SCV004017840|SCV004239793|SCV006059717
40341019	TP53	NM_000546.6	NM_000546.6:c.91G>T	NP_000537.3:p.Val31Phe	missense_variant	exon	1	1	0	-	-	-	-	-	-	no aberration		-	0	≤20	0	233852	criteria_provided,_multiple_submitters,_no_conflicts	Uncertain_significance	NA	VUS	NO	SCV000278312|SCV002147767|SCV002582167|SCV002582730|SCV002584772|SCV004360021
40341019	TP53	NM_000546.6	NM_000546.6:c.93T>A	NP_000537.3:p.Val31=	synonymous_variant	exon	1	1	0	-	-	-	-	-	-	no aberration		-	0	≤20	0.01	2033299	criteria_provided,_single_submitter	Likely_benign	NA	LB	YES	SCV003239916
40341019	TP53	NM_000546.6	NM_000546.6:c.93T>G	NP_000537.3:p.Val31=	synonymous_variant	exon	1	1	0	-	-	-	-	-	-	no aberration		-	0	≤20	0	485033	criteria_provided,_multiple_submitters,_no_conflicts	Benign/Likely_benign	NA	B/LB	YES	SCV000672396|SCV000718468|SCV002582303|SCV002582964|SCV004297909|SCV006298574
40341019	TP53	NM_000546.6	NM_000546.6:c.94C>G	NP_000537.3:p.Leu32Val	missense_variant,splice_region_variant	exon,splice_region	1	1	0	-	-	-	-	-	-	no aberration		-	0	≤20	0.01	1767161	criteria_provided,_single_submitter	Likely_benign	NA	LB	YES	SCV002688226
40341019	TP53	NM_000546.6	NM_000546.6:c.94C>T	NP_000537.3:p.Leu32=	splice_region_variant,synonymous_variant	exon,splice_region	1	1	0	-	-	-	-	-	-	no aberration		-	0	≤20	0.01	486552	criteria_provided,_multiple_submitters,_no_conflicts	Likely_benign	NA	LB	YES	SCV000675336|SCV002374213|SCV002582301|SCV002582963
40341019	TP53	NM_000546.6	NM_000546.6:c.96G>A	NP_000537.3:p.Leu32=	splice_region_variant,synonymous_variant	exon,splice_region	1	1	0	-	-	-	-	-	-	no aberration		-	0	≤20	0.06	663809	criteria_provided,_multiple_submitters,_no_conflicts	Uncertain_significance	NA	VUS	NO	SCV000962533|SCV004054275
40341019	TP53	NM_000546.6	NM_000546.6:c.577C>T	NP_000537.3:p.His193Tyr	missense_variant	exon	1	1	0	-	-	-	-	-	-	no aberration		-	0	≤20	0.09	230256	criteria_provided,_multiple_submitters,_no_conflicts	Pathogenic/Likely_pathogenic	NA	P/LP	NO	SCV000273726|SCV000491082|SCV000949726|SCV002582376|SCV002583037|SCV004932201
40341019	TP53	NM_000546.6	NM_000546.6:c.586C>T	NP_000537.3:p.Arg196Ter	stop_gained	exon	1	1	0	-	-	-	-	-	-	no aberration		-	0	N/A (stop gained)	0.21	43589	criteria_provided,_multiple_submitters,_no_conflicts	Pathogenic	NA	P	NO	SCV000060186|SCV000186503|SCV000260299|SCV000490858|SCV000597519|SCV000605426|SCV001134872|SCV001351214|SCV001447028|SCV001482285|SCV002011369|SCV002582485|SCV002583146|SCV004204262|SCV004932444|SCV005200616|SCV005918341
40341019	TP53	NM_000546.6	NM_000546.6:c.587G>C	NP_000537.3:p.Arg196Pro	missense_variant	exon	1	1	0	-	-	-	-	-	-	no aberration		-	0	≤20	0.07	231165	criteria_provided,_multiple_submitters,_no_conflicts	Pathogenic/Likely_pathogenic	NA	P/LP	NO	SCV000274927|SCV002530470|SCV003784963|SCV004359998|SCV004931085
40341019	TP53	NM_000546.6	NM_000546.6:c.587G>T	NP_000537.3:p.Arg196Leu	missense_variant	exon	1	1	0	-	-	-	-	-	-	no aberration		-	0	≤20	0.14	100814	criteria_provided,_conflicting_classifications	Conflicting_classifications_of_pathogenicity	Likely_pathogenic(1)|Uncertain_significance(5)	VUS	NO	SCV001186684|SCV001478187|SCV001735580|SCV003317131|SCV005651985|SCV005687972
40341019	TP53	NM_000546.6	NM_000546.6:c.588A>G	NP_000537.3:p.Arg196=	synonymous_variant	exon	1	1	0	-	-	-	-	-	-	no aberration		-	0	≤20	0.08	3809665	criteria_provided,_single_submitter	Likely_benign	NA	LB	YES	SCV005951591
40341019	TP53	NM_000546.6	NM_000546.6:c.593A>G	NP_000537.3:p.Glu198Gly	missense_variant	exon	1	1	0	-	-	-	-	-	-	no aberration		-	0	≤20	0.15	1750606	criteria_provided,_multiple_submitters,_no_conflicts	Uncertain_significance	NA	VUS	NO	SCV002653971|SCV003301929|SCV004359997
40341019	TP53	NM_000546.6	NM_000546.6:c.595G>T	NP_000537.3:p.Gly199Ter	stop_gained	exon	1	1	0	-	-	-	-	-	-	no aberration		-	0	N/A (stop gained)	0.14	634672	no_assertion_criteria_provided	Pathogenic	NA	P	NO	SCV000923826
40341019	TP53	NM_000546.6	NM_000546.6:c.596G>T	NP_000537.3:p.Gly199Val	missense_variant	exon	1	1	0	-	-	-	-	-	-	no aberration		-	0	≤20	0.04	451799	criteria_provided,_single_submitter	Likely_pathogenic	NA	LP	NO	SCV000620549
40341019	TP53	NM_000546.6	NM_000546.6:c.619G>A	NP_000537.3:p.Asp207Asn	missense_variant	exon	1	1	0	-	-	-	-	-	-	no aberration		-	0	≤20	0.13	2969522	criteria_provided,_single_submitter	Uncertain_significance	NA	VUS	NO	SCV004627477
40341019	TP53	NM_000546.6	NM_000546.6:c.620A>G	NP_000537.3:p.Asp207Gly	missense_variant	exon	1	1	0	-	-	-	-	-	-	no aberration		-	0	≤20	0.26	3972466	criteria_provided,_single_submitter	Uncertain_significance	NA	VUS	NO	SCV006178268
40341019	TP53	NM_000546.6	NM_000546.6:c.622G>A	NP_000537.3:p.Asp208Asn	missense_variant	exon	1	1	0	-	-	-	-	-	-	no aberration		-	0	≤20	0.07	1752332	criteria_provided,_single_submitter	Likely_benign	NA	LB	YES	SCV002658239
40341019	TP53	NM_000546.6	NM_000546.6:c.623A>T	NP_000537.3:p.Asp208Val	missense_variant	exon	1	1	0	-	-	-	-	-	-	no aberration		-	0	≤20	0.09	1036023	criteria_provided,_conflicting_classifications	Conflicting_classifications_of_pathogenicity	Pathogenic(1)|Likely_pathogenic(1)|Uncertain_significance(1)	P/LP	NO	SCV001532672|SCV002659448|SCV005689589
40341019	TP53	NM_000546.6	NM_000546.6:c.624C>T	NP_000537.3:p.Asp208=	synonymous_variant	exon	1	1	0	-	-	-	-	-	-	no aberration		-	0	≤20	0.12	1136749	criteria_provided,_single_submitter	Likely_benign	NA	LB	YES	SCV001676663
40341019	TP53	NM_000546.6	NM_000546.6:c.628A>T	NP_000537.3:p.Asn210Tyr	missense_variant	exon	1	1	0	-	-	-	-	-	-	no aberration		-	0	≤20	0.03	406588	criteria_provided,_single_submitter	Uncertain_significance	NA	VUS	NO	SCV000545326
40341019	TP53	NM_000546.6	NM_000546.6:c.638G>A	NP_000537.3:p.Arg213Gln	missense_variant	exon	1	1	0	-	-	-	-	-	-	no aberration		-	0	≤20	0.08	135359	criteria_provided,_multiple_submitters,_no_conflicts	Pathogenic/Likely_pathogenic	NA	P/LP	NO	SCV000166400|SCV000184899|SCV000292157|SCV000517027|SCV000731632|SCV001434920|SCV001449717|SCV001469324|SCV002042828|SCV002582482|SCV002583142|SCV003800820|SCV003843119|SCV003925607|SCV004206242|SCV004823777|SCV005329582|SCV005407759
40341019	TP53	NM_000546.6	NM_000546.6:c.638G>C	NP_000537.3:p.Arg213Pro	missense_variant	exon	1	1	0	-	-	-	-	-	-	no aberration		-	0	≤20	0.14	231214	criteria_provided,_multiple_submitters,_no_conflicts	Pathogenic/Likely_pathogenic	NA	P/LP	NO	SCV000274991|SCV000605421|SCV002582373|SCV002583034|SCV003442486|SCV005888858
40341019	TP53	NM_000546.6	NM_000546.6:c.638G>T	NP_000537.3:p.Arg213Leu	missense_variant	exon	1	1	0	-	-	-	-	-	-	no aberration		-	0	≤20	0.13	376650	criteria_provided,_conflicting_classifications	Conflicting_classifications_of_pathogenicity	Pathogenic(1)|Likely_pathogenic(1)|Uncertain_significance(1)	P/LP	NO	SCV001567646|SCV004931617|SCV005522069
40341019	TP53	NM_000546.6	NM_000546.6:c.660T>A	NP_000537.3:p.Tyr220Ter	stop_gained	exon	1	1	0	-	-	-	-	-	-	no aberration		-	0	N/A (stop gained)	0.09	634774	criteria_provided,_multiple_submitters,_no_conflicts	Pathogenic	NA	P	NO	SCV004931613|SCV005522082|SCV005750181
40341019	TP53	NM_000546.6	NM_000546.6:c.661G>A	NP_000537.3:p.Glu221Lys	missense_variant	exon	1	1	0	-	-	-	-	-	-	no aberration		-	0	≤20	0.08	184647	criteria_provided,_multiple_submitters,_no_conflicts	Uncertain_significance	NA	VUS	NO	SCV000214531|SCV000629849|SCV001340444|SCV002011368|SCV002582032|SCV002582540
40341019	TP53	NM_000546.6	NM_000546.6:c.664C>T	NP_000537.3:p.Pro222Ser	missense_variant	exon	1	1	0	-	-	-	-	-	-	no aberration		-	0	≤20	0.04	406592	criteria_provided,_conflicting_classifications	Conflicting_classifications_of_pathogenicity	Uncertain_significance(2)|Likely_benign(2)	VUS	NO	SCV000545333|SCV000672417|SCV000910215|SCV004022731
40341019	TP53	NM_000546.6	NM_000546.6:c.666G>T	NP_000537.3:p.Pro222=	synonymous_variant	exon	1	1	0	-	-	-	-	-	-	no aberration		-	0	≤20	0.05	132972	criteria_provided,_multiple_submitters,_no_conflicts	Benign/Likely_benign	NA	B/LB	YES	SCV000212719|SCV000253314|SCV000686759|SCV000697445|SCV001134875|SCV001940211|SCV002042830|SCV002532701|SCV002582549|SCV002582851|SCV004017834|SCV004823773|SCV004848641|SCV005872476|SCV005918346

## Sheet: S5
Supplementary Table 5. Manual review of ClinVar submissions for variants outside the splice donor/acceptor ±1,2 dinucleotide positions
# Check for circularity: ClinVar variants that were classified with or without the application of minigene splicing data from Eladio A. Velasco-Sampedro (EAVS) research group (online ClinVar search date: 19 Feb 2026)
# Excluded from the Reference Set: variants classified as VUS after review
Reference set	Gene	HGVSc	ClinVar ID	At least 1 submitter cited EAVS paper	EAVS paper	Number of ClinVar submissions (1 or more stars) that cited or did not cite the EAVS paper	EAVS paper not cited - majority rule for conflicting classifications	EAVS paper not cited - summary classification	P/LP set: EAVS minigene data + other assays (e.g. patient RNA)	Additional information	Keep variant in the Reference Set
P/LP	RAD51C	NM_058216.3:c.571+5G>A	216805	YES	Sanoguera-Miralles 2020 (PMID 33333735)	8 of 13 submitters cited EAVS paper and classified the variant as P/LP (6) or VUS (2); the remaining 5 submitters classified the variant as P/LP (3) or VUS (2)	P/LP	P/LP	YES		YES
P/LP	RAD51C	NM_058216.3:c.965+5G>A	409841	YES	Sanoguera-Miralles 2020 (PMID 33333735)	3 of 5 submitters cited EAVS paper and classified the variant as P/LP; the remaining 2 submitters classified the variant as LP	-	LP	YES		YES
P/LP	RAD51C	NM_058216.3:c.1026+5_1026+7del	128201	YES	Sanoguera-Miralles 2020 (PMID 33333735)	6 of 22 submitters cited EAVS paper and classified the variant as P/LP; the remaining 16 submitters classified the variant as P/LP	-	P/LP	YES	Submitter: German Consortium for Hereditary Breast and Ovarian Cancer: PVS1_RNA - EAVS minigene data; Submitter: Molecular Diagnostics Laboratory, Catalan Institute of Oncology: PVS1_Strong (RNA) - EAVS minigene data + other assays	YES
P/LP	RAD51C	NM_058216.3:c.837+4_837+7del	128212	YES	Sanoguera-Miralles 2022 (PMID 35740625)	3 of 5 submitters cited EAVS paper and classified the variant as P/LP (2) or VUS (1); the remaining 2 submitters classified the variant as LP	-	LP	YES		YES
P/LP	PALB2	NM_024675.4:c.48G>A	143978	NO	-	-	-	-	-		YES
P/LP	PALB2	NM_024675.4:c.3113+5G>C	231961	YES	Valenzuela-Palomo 2022 (PMID 34846068)	5 of 11 submitters cited EAVS paper and classified the variant as P/LP; the remaining 6 submitters classified the variant as P/LP	-	P/LP	YES		YES
P/LP	PALB2	NM_024675.4:c.3350+4A>G	126737	YES	Valenzuela-Palomo 2022 (PMID 34846068)	4 of 17 submitters cited EAVS paper and classified the variant as P; the remaining 13 submitters classified the variant as P/LP	-	P/LP	YES		YES
P/LP	PALB2	NM_024675.4:c.3350+5G>A	142586	YES	Valenzuela-Palomo 2022 (PMID 34846068)	4 of 13 submitters cited EAVS paper and classified the variant as LP; the remaining 9 submitters classified the variant as P/LP	-	P/LP	YES		YES
P/LP	ATM	NM_000051.4:c.496+5G>A	3047	YES	Bueno-Martínez 2022 (PMID 35716007)	4 of 10 submitters cited EAVS paper and classified the variant as LP; the remaining 6 submitters classified the variant as P/LP	-	P/LP	YES		YES
P/LP	ATM	NM_000051.4:c.4109+5G>A	838766	NO	-	-	-	-	-		YES
P/LP	ATM	NM_000051.4:c.4110-9C>G	407567	YES	Bueno-Martínez 2022 (PMID 35716007)	1 of 7 submitters cited EAVS paper and classified the variant as LP; the remaining 6 submitters classified the variant as P/LP (4) or VUS (2)	P/LP	P/LP	YES		YES
P/LP	ATM	NM_000051.4:c.7788G>A	135778	YES	Bueno-Martínez 2022 (PMID 35716007)	1 of 13 submitters cited EAVS paper and classified the variant as P; the remaining 12 submitters classified the variant as P/LP	-	P/LP	YES		YES
P/LP	CHEK2	NM_007194.4:c.592+3A>T	142956	YES	Sanoguera-Miralles 2024 (PMID 37725924)	3 of 24 submitters cited EAVS paper and classified the variant as LP; the remaining 21 submitters classified the variant as P/LP	-	P/LP	YES		YES
P/LP	CHEK2	NM_007194.4:c.846+4_846+7del	216652	YES	Sanoguera-Miralles 2024 (PMID 37725924)	4 of 21 submitters cited EAVS paper and classified the variant as P/LP; the remaining 17 submitters classified the variant as P/LP	-	P/LP	YES		YES
P/LP	CHEK2	NM_007194.4:c.1260-8A>G	216641	YES	Sanoguera-Miralles 2024 (PMID 37725924)	2 of 8 submitters cited EAVS paper and classified the variant as LP; the remaining 6 submitters classified the variant as P/LP (5) or VUS (1)	P/LP	P/LP	YES		YES
P/LP	BRCA2	NM_000059.4:c.67+3A>G	826563	YES	Fraile-Bethencourt 2019 (PMID 30883759)	2 of 3 submitters cited EAVS paper and classified the variant as P/LP; the remaining 1 submitter classified the variant as LP	-	LP	YES		YES
P/LP	BRCA2	NM_000059.4:c.316+3del	51408	NO	-	-	-	-	-	Reported as NM_000059.4(BRCA2):c.316+4del in ClinVar	YES
P/LP	BRCA2	NM_000059.4:c.316+5G>C	51410	YES	Fraile-Bethencourt 2019 (PMID 30883759)	2 of 6 submitters cited EAVS paper and classified the variant as P; the remaining 4 submitters classified the variant as P	-	P	YES		YES
P/LP	BRCA2	NM_000059.4:c.475+3A>T	126116	NO	-	-	-	-	-		YES
P/LP	BRCA2	NM_000059.4:c.631+3A>G	52054	YES	Fraile-Bethencourt 2019 (PMID 30883759)	4 of 6 submitters cited EAVS paper and classified the variant as LP; the remaining 2 submitters classified the variant as P/LP	-	P/LP	YES		YES
P/LP	BRCA2	NM_000059.4:c.632-3C>G	219896	YES	Fraile-Bethencourt 2019 (PMID 30883759)	8 of 10 submitters cited EAVS paper and classified the variant as P/LP; the remaining 2 submitters classified the variant as P/LP	-	P/LP	YES		YES
P/LP	BRCA2	NM_000059.4:c.681+4A>G	52193	YES	Fraile-Bethencourt 2019 (PMID 30883759)	5 of 6 submitters cited EAVS paper and classified the variant as P/LP; the remaining 1 submitter classified the variant as P	-	P	YES		YES
P/LP	BRCA2	NM_000059.4:c.7805+3A>C	52411	YES	Fraile-Bethencourt 2018 (PMID 29881398)	2 of 3 submitters cited EAVS paper and classified the variant as LP (1) or VUS (1); the remaining 1 submitter classified the variant as P	-	P	NO	Submitter: ClinGen ENIGMA VCEP: LP - PVS1_Strong (RNA) - EAVS minigene data, PM2_Supporting, PS3	YES
P/LP	BRCA2	NM_000059.4:c.7806-9T>G	52420	YES	Fraile-Bethencourt 2017 (PMID 28339459)	2 of 3 submitters cited EAVS paper and classified the variant as P; the remaining 1 submitter classified the variant as P	-	P	YES		YES
P/LP	BRCA2	NM_000059.4:c.8754G>A	52671	YES	Acedo 2015 (PMID 25382762)	6 of 7 submitters cited EAVS paper and classified the variant as P/LP; the remaining 1 submitter classified the variant as P	-	P	YES		YES
P/LP	BRCA2	NM_000059.4:c.8754+4A>G	52669	YES	Acedo 2015 (PMID 25382762)	7 of 9 submitters cited EAVS paper and classified the variant as P/LP; the remaining 2 submitters classified the variant as P/LP	-	P/LP	YES		YES
P/LP	BRCA2	NM_000059.4:c.8754+5G>A	38182	YES	Acedo 2015 (PMID 25382762)	1 of 5 submitters cited EAVS paper and classified the variant as P; the remaining 4 submitters classified the variant as P/LP	-	P/LP	YES		YES
P/LP	BRCA2	NM_000059.4:c.9117G>A	38215	YES	Acedo 2015 (PMID 25382762)	7 of 27 submitters cited EAVS paper and classified the variant as P; the remaining 20 submitters classified the variant as P	-	P	YES		YES
P/LP	BRCA2	NM_000059.4:c.9501G>A	52855	NO	-	-	-	-	-	Single submitter (no star): Breast Cancer Information Core (BIC) (BRCA2), 1997. Review following the ClinGen ENIGMA BRCA1/2 VCEP Specifications V1.2, EAVS minigene data not used (19 Feb 2026): VUS - PM2_Supporting, no bioinformatic code (synonymous variant with SpliceAI max delta score = 0.16), no other information	NO
B/LB	RAD51C	NM_058216.3:c.146-3C>T	409838	YES	Sanoguera-Miralles 2020 (PMID 33333735)	1 of 6 submitters cited EAVS paper and classified the variant as VUS; the remaining 5 submitters classified the variant as LB	LB	LB	-		YES
B/LB	PALB2	NM_024675.4:c.48+7G>C	241568	NO	-	-	-	-	-		YES
B/LB	PALB2	NM_024675.4:c.109-6_109-4del	630449	NO	-	-	-	-	-		YES
B/LB	PALB2	NM_024675.4:c.48+5C>T	492225	NO	-	-	-	-	-		YES
B/LB	PALB2	NM_024675.4:c.108+5G>A	568096	NO	-	-	-	-	-		YES
B/LB	PALB2	NM_024675.4:c.210A>G	482003	NO	-	-	-	-	-		YES
B/LB	PALB2	NM_024675.4:c.210A>C	186040	NO	-	-	-	-	-		YES
B/LB	ATM	NM_000051.4:c.903T>G	231747	YES	Bueno-Martínez 2022 (PMID 35716007)	1 of 6 submitters cited EAVS paper and classified the variant as LB; the remaining 5 submitters classified the variant as B/LB	-	B/LB	-		YES
B/LB	ATM	NM_000051.4:c.1066-6T>G	3038	YES	Bueno-Martínez 2022 (PMID 35716007)	2 of 25 submitters cited EAVS paper and classified the variant as B/LB; the remaining 23 submitters classified the variant as B/LB (19) or VUS (4)	B/LB	B/LB	-	This is a common variant, meeting BS1 population code. Although the variant leads to intermediate level of aberration, background splicing is tolerated at this junction: 34% predicted LOF transcript in WT construct.	YES
B/LB	ATM	NM_000051.4:c.3993+5G>T	136444	YES	Bueno-Martínez 2022 (PMID 35716007)	2 of 17 submitters cited EAVS paper and classified the variant as B; the remaining 15 submitters classified the variant as B/LB	-	B/LB	-		YES
B/LB	CHEK2	NM_007194.4:c.-6G>A	128041	NO	-	-	-	-	-		YES
B/LB	BRCA2	NM_000059.4:c.68-7T>A	52187	NO	-	-	-	-	-		YES
B/LB	BRCA2	NM_000059.4:c.222G>A	384193	NO	-	-	-	-	-		YES
B/LB	BRCA2	NM_000059.4:c.378A>G	184648	NO	-	-	-	-	-		YES
B/LB	BRCA2	NM_000059.4:c.438A>G	427541	NO	-	-	-	-	-		YES
B/LB	BRCA2	NM_000059.4:c.441A>G	51645	YES	Fraile-Bethencourt 2019 (PMID 30883759)	3 of 11 submitters cited EAVS paper and classified the variant as LB; the remaining 8 submitters classified the variant as LB	-	LB	-	EAVS minigene data - complete impact; 1 patient assay (PMID 32123317) - no impact. VCEP Specifications V1.2, EAVS minigene data not used (19 Feb 2026): Benign - BS1_Supporting, BP1_Strong (synonymous variant outside a known clinically important domain and no predicted impact on splicing, SpliceAI maximum score = 0.04), BP5_Strong, based on case-control LR code. Total 9 benign points.	YES
B/LB	BRCA2	NM_000059.4:c.447A>G	1740873	NO	-	-	-	-	-		YES
B/LB	BRCA2	NM_000059.4:c.606C>T	252412	NO	-	-	-	-	-		YES
B/LB	BRCA2	NM_000059.4:c.627C>A	185119	NO	-	-	-	-	-		YES
B/LB	BRCA2	NM_000059.4:c.627C>T	182278	NO	-	-	-	-	-		YES
B/LB	BRCA2	NM_000059.4:c.741C>T	52324	NO	-	-	-	-	-		YES
B/LB	BRCA2	NM_000059.4:c.750G>A	135814	NO	-	-	-	-	-		YES
B/LB	BRCA2	NM_000059.4:c.7008-5T>C	38078	YES	Fraile-Bethencourt 2019 (PMID 30883759)	3 of 8 submitters cited EAVS paper and classified the variant as LB (2) or VUS (1); the remaining 5 submitters classified the variant as LB (3) or VUS (2)	LB	LB	-	Submitter: ClinGen ENIGMA VCEP: LB - BP7_Strong (RNA) - EAVS minigene data, PM2_Supporting	YES
B/LB	BRCA2	NM_000059.4:c.7182A>G	52280	NO	-	-	-	-	-		YES
B/LB	BRCA2	NM_000059.4:c.7296A>G	391335	NO	-	-	-	-	-		YES
B/LB	BRCA2	NM_000059.4:c.7428A>G	2774942	NO	-	-	-	-	-		YES
B/LB	BRCA2	NM_000059.4:c.7435+6G>A	38096	YES	Fraile-Bethencourt 2019 (PMID 30883759)	2 of 20 submitters cited EAVS paper and classified the variant as B; the remaining 18 submitters classified the variant as B/LB (16) or VUS (2)	B/LB	B/LB	-	Submitter: Molecular Diagnostics Laboratory, Catalan Institute of Oncology: B - BP7_Strong (RNA) - EAVS minigene data, BA1, BP5_Strong	YES
B/LB	BRCA2	NM_000059.4:c.7435+7T>G	236902	NO	-	-	-	-	-		YES
B/LB	BRCA2	NM_000059.4:c.7435+10G>A	52327	YES	Fraile-Bethencourt 2019 (PMID 30883759)	2 of 7 submitters cited EAVS paper and classified the variant as LB; the remaining 5 submitters classified the variant as LB (3) or VUS (2)	LB	LB	-		YES
B/LB	BRCA2	NM_000059.4:c.7436-14T>G	52328	YES	Fraile-Bethencourt 2019 (PMID 30883759)	1 of 5 submitters cited EAVS paper and classified the variant as LB; the remaining 4 submitters classified the variant as LB	-	LB	-		YES
B/LB	BRCA2	NM_000059.4:c.7436-4A>G	38097	YES	Fraile-Bethencourt 2019 (PMID 30883759)	4 of 11 submitters cited EAVS paper and classified the variant as LB; the remaining 7 submitters classified the variant as B/LB (6) or VUS (1)	B/LB	B/LB	-		YES
B/LB	BRCA2	NM_000059.4:c.7436-4A>T	462438	NO	-	-	-	-	-		YES
B/LB	BRCA2	NM_000059.4:c.7467T>C	2719609	NO	-	-	-	-	-		YES
B/LB	BRCA2	NM_000059.4:c.7806-40A>G	52419	NO	-	-	-	-	-		YES
B/LB	BRCA2	NM_000059.4:c.7875A>G	1086635	YES	Fraile-Bethencourt 2017 (PMID 28339459)	1 of 3 submitters cited EAVS paper and classified the variant as LB; the remaining 2 submitters classified the variant as LB (1) or VUS (1)	VUS	VUS	-	Review following the ClinGen ENIGMA BRCA1/2 VCEP Specifications V1.2, EAVS minigene data not used (19 Feb 2026): VUS	NO
B/LB	BRCA2	NM_000059.4:c.7947A>G	52445	NO	-	-	-	-	-		YES
B/LB	BRCA2	NM_000059.4:c.7971A>G	215618	NO	-	-	-	-	-		YES
B/LB	BRCA2	NM_000059.4:c.7976+35C>A	433821	NO	-	-	-	-	-		YES
B/LB	BRCA2	NM_000059.4:c.7992T>A	52463	YES	Fraile-Bethencourt 2017 (PMID 28339459)	3 of 10 submitters cited EAVS paper and classified the variant as LB; the remaining 7 submitters classified the variant as B/LB (5) or VUS (2)	B/LB	B/LB	-		YES
B/LB	BRCA2	NM_000059.4:c.8019A>G	4215409	NO	-	-	-	-	-		YES
B/LB	BRCA2	NM_000059.4:c.9257-18C>A	52791	YES	Acedo 2015 (PMID 25382762)	1 of 4 submitters cited EAVS paper and classified the variant as LB; the remaining 3 submitters classified the variant as B/LB	-	B/LB	-		YES
B/LB	BRCA2	NM_000059.4:c.9501+3A>T	38242	YES	Acedo 2015 (PMID 25382762)	4 of 21 submitters cited EAVS paper and classified the variant as B/LB; the remaining 17 submitters classified the variant as B/LB (10) or VUS (7)	B/LB	B/LB	-		YES
B/LB	BRCA2	NM_000059.4:c.9501+4A>G	52854	NO	-	-	-	-	-		YES
B/LB	BRCA2	NM_000059.4:c.9501+9A>C	38243	NO	-	-	-	-	-		YES
B/LB	BRCA2	NM_000059.4:c.9502-12T>G	52856	YES	Acedo 2015 (PMID 25382762)	2 of 16 submitters cited EAVS paper and classified the variant as B; the remaining 14 submitters classified the variant as B/LB (10) or VUS (4)	B/LB	B/LB	-		YES
B/LB	BRCA2	NM_000059.4:c.9646C>T	52878	NO	-	-	-	-	-		YES
B/LB	BRCA2	NM_000059.4:c.9649-5A>G	385769	NO	-	-	-	-	-		YES
B/LB	TP53	NM_000546.6:c.816G>A	1136213	NO	-	-	-	-	-		YES
B/LB	TP53	NM_000546.6:c.315C>T	4071190	NO	-	-	-	-	-		YES
B/LB	TP53	NM_000546.6:c.96+31_96+54del	926699	NO	-	-	-	-	-		YES
B/LB	TP53	NM_000546.6:c.594A>G	2758376	NO	-	-	-	-	-		YES
B/LB	TP53	NM_000546.6:c.672+7T>G	4071436	NO	-	-	-	-	-		YES
B/LB	TP53	NM_000546.6:c.672+18G>A	3673840	NO	-	-	-	-	-		YES
B/LB	TP53	NM_000546.6:c.78T>C	482209	NO	-	-	-	-	-		YES
B/LB	TP53	NM_000546.6:c.81T>C	511134	NO	-	-	-	-	-		YES
B/LB	TP53	NM_000546.6:c.81T>G	1762440	NO	-	-	-	-	-		YES
B/LB	TP53	NM_000546.6:c.87C>T	1764717	NO	-	-	-	-	-		YES
B/LB	TP53	NM_000546.6:c.90C>T	215764	NO	-	-	-	-	-		YES
B/LB	TP53	NM_000546.6:c.93T>A	2033299	NO	-	-	-	-	-		YES
B/LB	TP53	NM_000546.6:c.93T>G	485033	NO	-	-	-	-	-		YES
B/LB	TP53	NM_000546.6:c.94C>T	486552	NO	-	-	-	-	-		YES
B/LB	TP53	NM_000546.6:c.588A>G	3809665	NO	-	-	-	-	-		YES
B/LB	TP53	NM_000546.6:c.624C>T	1136749	NO	-	-	-	-	-		YES
B/LB	TP53	NM_000546.6:c.666G>T	132972	NO	-	-	-	-	-		YES
B/LB missense	PALB2	NM_024675.4:c.46A>G	873421	NO	-	-	-	-	-		YES
B/LB missense	BRCA2	NM_000059.4:c.440A>G	51644	NO	-	-	-	-	-		YES
B/LB missense	BRCA2	NM_000059.4:c.506A>G	37941	YES	Fraile-Bethencourt 2019 (PMID 30883759)	2 of 12 submitters cited EAVS paper and classified the variant as LB; the remaining 10 submitters classified the variant as B/LB (8) or VUS (2)	B/LB	B/LB	-		YES
B/LB missense	BRCA2	NM_000059.4:c.599C>T	140966	NO	-	-	-	-	-		YES
B/LB missense	BRCA2	NM_000059.4:c.7397T>C	133738	NO	-	-	-	-	-		YES
B/LB missense	BRCA2	NM_000059.4:c.7544C>T	38102	NO	-	-	-	-	-		YES
B/LB missense	BRCA2	NM_000059.4:c.7601C>T	38109	NO	-	-	-	-	-		YES
B/LB missense	BRCA2	NM_000059.4:c.7625C>G	52371	NO	-	-	-	-	-		YES
B/LB missense	BRCA2	NM_000059.4:c.7985C>T	184089	YES	Fraile-Bethencourt 2017 (PMID 28339459)	3 of 11 submitters cited EAVS paper and classified the variant as B (1) or VUS (2); the remaining 8 submitters classified the variant as B/LB (5) or VUS (3)	B/LB	B/LB	-		YES
B/LB missense	BRCA2	NM_000059.4:c.8027T>C	38136	NO	-	-	-	-	-		YES
B/LB missense	BRCA2	NM_000059.4:c.8084C>T	52500	NO	-	-	-	-	-		YES
B/LB missense	BRCA2	NM_000059.4:c.8111C>T	52507	YES	Fraile-Bethencourt 2017 (PMID 28339459)	2 of 11 submitters cited EAVS paper and classified the variant as LB (1) or VUS (1); the remaining 9 submitters classified the variant as B/LB (5) or VUS (4)	B/LB	B/LB	-		YES
B/LB missense	BRCA2	NM_000059.4:c.8647C>T	38175	YES	Acedo 2015 (PMID 25382762)	3 of 9 submitters cited EAVS paper and classified the variant as LB; the remaining 6 submitters classified the variant as B/LB (4) or VUS (2)	B/LB	B/LB	-		YES
B/LB missense	BRCA2	NM_000059.4:c.8723T>G	52662	YES	Acedo 2015 (PMID 25382762)	1 of 12 submitters cited EAVS paper and classified the variant as LB; the remaining 11 submitters classified the variant as LB (10) or VUS (1)	LB	LB	-		YES
B/LB missense	BRCA2	NM_000059.4:c.9454G>A	52838	YES	Acedo 2015 (PMID 25382762)	3 of 10 submitters cited EAVS paper and classified the variant as LB; the remaining 7 submitters classified the variant as LB (4) or VUS (3)	LB	LB	-		YES
B/LB missense	TP53	NM_000546.6:c.784G>A	141228	NO	-	-	-	-	-		YES
B/LB missense	TP53	NM_000546.6:c.85A>G	822586	NO	-	-	-	-	-		YES
B/LB missense	TP53	NM_000546.6:c.91G>A	127827	NO	-	-	-	-	-		YES
B/LB missense	TP53	NM_000546.6:c.94C>G	1767161	NO	-	-	-	-	-		YES
B/LB missense	TP53	NM_000546.6:c.622G>A	1752332	NO	-	-	-	-	-		YES

## Sheet: S6
Supplementary Table S6. Concordance of SpliceAI max delta score thresholds defined in Walker et al., 2023 and observed splicing by MPSAs
MaPSy Studies						Vex-seq						MFASS						TTN assay						ParSE-Seq
Soemedi						Adamson						Chong						Patel						O'Neill
|allelic ratio FC| > 1.5 & FDR < 0.05						|DPSI| > 5						DPSI < 50%												DPSI < -50% & FDR < 0.1
	No splicing	proportion	Splicing	proportion			No splicing	proportion	Splicing	proportion			No splicing	proportion	Splicing	proportion			No splicing	proportion	Splicing	proportion			No splicing	proportion	Unknown	proportion	Splicing	proportion
<=0.1	3660	0.840799	443	0.53632		<=0.1	1229	0.866714	257	0.645729		<=0.1	24860	0.932099	489	0.465714		<=0.1	108	0.794118	27	0.228814		<=0.1	62	0.601942	12	0.285714	1	0.012987
0.1-0.2	371	0.0852286	113	0.136804		0.1-0.2	109	0.0768688	52	0.130653		0.1-0.2	1014	0.0380188	128	0.121905		0.1-0.2	5	0.0367647	13	0.110169		0.1-0.2	13	0.126214	3	0.0714286	0	0
>=0.2	322	0.073972	270	0.326877		>=0.2	80	0.0564175	89	0.223618		>=0.2	797	0.0298826	433	0.412381		>=0.2	23	0.169118	78	0.661017		>=0.2	28	0.271845	27	0.642857	76	0.987013
Rhine
|allelic ratio FC| > 1.5 & FDR < 0.05
	No splicing	proportion	Splicing	proportion
<=0.1	589	0.866176	17	0.404762
0.1-0.2	58	0.0852941	4	0.0952381
>=0.2	33	0.0485294	21	0.5
Rong
|allelic ratio FC| > log2(1.5) & FDR < 0.05
	No splicing	proportion	Splicing	proportion
<=0.1	3857	0.920305	761	0.782922
0.1-0.2	212	0.0505846	123	0.126543
>=0.2	122	0.02911	88	0.090535

## Sheet: S7
Supplementary Table S7. Number of variants tested and percentage of canonical transcript produced by each wild type construct included in the traditional minigene dataset.
Reference (PMID)	Gene	WT minigene construct	WT canonical transcript (%)	No. of variants tested	Total no. of variants
35716007	ATM	mgATM_ex4-9	65.7	14	56
35716007	ATM	mgATM _ex11-17	84.1	11
35716007	ATM	mgATM _ex25_29	100	20
35716007	ATM	mgATM _ex49-52	75.8	11
30883759	BRCA2	mgBR2_ex2-9	91.9	83	239
31191615, 29881398, 28339459	BRCA2	mgBR2_ex14-20	100	116
25382762	BRCA2	mgBR2_ex19-27	100	40
37725924	CHEK2	mgChk2_ex1-7	73.3	27	52
37725924	CHEK2	mgChk2_ex6-10	89.5	14
37725924	CHEK2	mgChk2_ex11-15	85.9	11
34846068, 36139699	PALB2	mgPB2_ex1-3	100	29	58
34846068	PALB2	mgPB2_ex4-6	100	5
34846068	PALB2	mgPB2_ex5-12	100	24
33333735, 35740625	RAD51C	mgR51C_ex2-8	98.6	40	40
34200360	RAD51D	mgR51D_ex2-9 (Primers V1-ex9)	57.8	2	11
34200360	RAD51D	mgR51D_ex2-9 (Primers ex2-V2)	73.1	9
39780207, 40341019	TP53	mgTP53_ex2-9	100	217	217
				Total =	673

## Sheet: S8
Supplementary Table S8. Distribution of variants outside the splice donor/acceptor ±1,2 dinucleotide positions with additional stratification of SpliceAI max delta score bins.
Stratification to identify similarity in proportions for bins for scores ≥0.2; total n=518
SpliceAI max delta Score	Non-spliceogenic set (n)	Proportion within non-spliceogenic set	Spliceogenic set* (n)	Proportion within spliceogenic set	No. of variants in the spliceogenic set, separated by level of aberration			Proportion in the spliceogenic set
					Low	Intermediate	High/ complete	Low	Intermediate	High/ complete	Comments
≤0.05	167	0.662698	36	0.135338	28	5	3	0.78	0.14	0.08
>0.05 & ≤0.1	31	0.123016	14	0.052632	7	7	0	0.5	0.5	0
>0.1 & <0.2	30	0.119048	32	0.120301	22	9	1	0.69	0.28	0.03
≥0.2 & <0.3	9	0.035714	15	0.056391	6	7	2	0.4	0.47	0.13	Youden's Index yields 0.185 for “no versus low-to-complete”
≥0.3 & <0.4	5	0.019841	22	0.082707	5	13	4	0.23	0.59	0.18	Youden's Index yields 0.285 for "no-low vs intermediate-complete"
≥0.4 & <0.5	3	0.011905	17	0.06391	2	7	8	0.12	0.41	0.47	Similar proportions for these bins
≥0.5 & <0.6	3	0.011905	18	0.067669	3	5	10	0.17	0.28	0.56
≥0.6 & <0.75	4	0.015873	26	0.097744	4	9	13	0.15	0.35	0.5
≥0.75 up to 0.8	0	0	8	0.030075	0	2	6	0	0.25	0.75	Similar proportions for these bins
≥0.8	0	0	78	0.293233	4	9	65	0.05	0.12	0.83
TOTAL =	252		266		81	73	112
*Spliceogenic set is subdivided into three levels of splicing impact - low, intermediate, and high/complete.
Collapsed strata based on similarity in proportions across different bins for scores ≥0.2; total n=518
SpliceAI max delta Score	Non-spliceogenic set (n)	Proportion within non-spliceogenic set	Spliceogenic set* (n)	Proportion within spliceogenic set	No. of variants in the spliceogenic set, separated by level of aberration			Proportion in the spliceogenic set
					Low	Intermediate	High/ complete	Low	Intermediate	High/ complete
≤0.05	167	0.662698	36	0.135338	28	5	3	0.78	0.14	0.08
>0.05 & ≤0.1	31	0.123016	14	0.052632	7	7	0	0.5	0.5	0
>0.1 & <0.2	30	0.119048	32	0.120301	22	9	1	0.69	0.28	0.03
≥0.2 & <0.3	9	0.035714	15	0.056391	6	7	2	0.4	0.47	0.13
≥0.3 & <0.4	5	0.019841	22	0.082707	5	13	4	0.23	0.59	0.18
≥0.4 & <0.75	10	0.039683	61	0.229323	9	21	31	0.15	0.34	0.51
≥0.75	0	0	86	0.323308	4	11	71	0.05	0.13	0.83
TOTAL =	252		266		81	73	112
*Spliceogenic set is subdivided into three levels of splicing impact - low, intermediate, and high/complete.
Kendall's τ	0.66
P value	1.4e-73

## Sheet: S9
Supplementary Table S9. Proportion of variants (including the splice donor/acceptor ±1,2 dinucleotide positions) across different ranges of SpliceAI max delta scores.
SpliceAI max delta score	No. of variants					Proportion in the spliceogenic set
	Non-spliceogenic set	Spliceogenic set*	Low	Intermediate	High/ complete	Low	Intermediate	High/ complete
≤0.05	167	37	28	5	4	0.76	0.14	0.11
>0.05 & ≤0.1	31	14	7	7	0	0.5	0.5	0
>0.1 & <0.2	30	32	22	9	1	0.69	0.28	0.03
≥0.2 & <0.5	17	55	14	27	14	0.25	0.49	0.25
≥0.5 & <0.8	7	56	7	16	33	0.13	0.29	0.59
≥0.8	0	227	4	9	214	0.02	0.04	0.94
TOTAL =	252	421	82	73	266
*Spliceogenic set is subdivided into three levels of splicing impact - low, intermediate, and high/complete.
Kendall's τ	0.761191
P value	1.62118e-121

[truncated: 5 more sheets: S10, S11, S12, S13, S14]
